# Supplementary material
Source: Research Square preprint supplement (doi:10.21203/rs.3.rs-9625420/v1)
Supplement: Supplementary file 1 [file ac35f2dc0a2b9104329143d6.xlsx]

## Sheet: Table S1
Cell Line ID	Cell Type	Histological Subtype	Source
H226	PM	Epithelioid	ATCC
H2452	PM	Epithelioid	ATCC
H28	PM	Epithelioid	ATCC
REN	PM	Epithelioid	University of Piemonte Orientale (Amedeo Avogadro), Novara, Italy
VMC20	PM	Epithelioid	Institute of Cancer Research and Walter Klepetko, Medical University of Vienna, Vienna, Austria
VMC23	PM	Epithelioid	Institute of Cancer Research and Walter Klepetko, Medical University of Vienna, Vienna, Austria
VMC33	PM	Epithelioid	Institute of Cancer Research and Walter Klepetko, Medical University of Vienna, Vienna, Austria
1157	PM	Epithelioid	ADDRI Biobank
1505	PM	Epithelioid	ADDRI Biobank
1506	PM	Epithelioid	ADDRI Biobank
2174	PM	Epithelioid	ADDRI Biobank
2175	PM	Epithelioid	ADDRI Biobank
2291	PM	Epithelioid	ADDRI Biobank
1187	PM	Epithelioid	ADDRI Biobank
MSTO-211H	PM	Non-Epithelioid (Biphasic)	ATCC
MM05	PM	Non-Epithelioid (Biphasic)	Thoracic Research Centre, The Prince Charles Hospital, The University of Queensland, Brisbane, Australia
VMC40	PM	Non-Epithelioid (Biphasic)	Institute of Cancer Research and Walter Klepetko, Medical University of Vienna, Vienna, Austria
1170	PM	Non-Epithelioid (Biphasic)	ADDRI Biobank
1171	PM	Non-Epithelioid (Biphasic)	ADDRI Biobank
1180	PM	Non-Epithelioid (Biphasic)	ADDRI Biobank
1518	PM	Non-Epithelioid (Biphasic)	ADDRI Biobank
1843	PM	Non-Epithelioid (Biphasic)	ADDRI Biobank
H2052	PM	Non-Epithelioid (Sarcomatoid)	ATCC
1137	PM	Non-Epithelioid (Sarcomatoid)	ADDRI Biobank
2359	PM	Non-Epithelioid (Sarcomatoid)	ADDRI Biobank
2347	PM	Unknown	ADDRI Biobank
2378	PM	Unknown	ADDRI Biobank
A549	Lung Cancer	-	ATCC
H1975	Lung Cancer	-	ATCC
H3122	Lung Cancer	-	ATCC
HCC827	Lung Cancer	-	ATCC
PC-9	Lung Cancer	-	ATCC
H23	Lung Cancer	-	ATCC
HCC1806	Breast Cancer	-	ATCC
MCF-7	Breast Cancer	-	ATCC
MDA-MB-231	Breast Cancer	-	University of New South Wales, Sydney, Australia
COLO 205	Colon Cancer	-	ATCC
HCT116	Colon Cancer	-	ATCC
HT-29	Colon Cancer	-	ATCC
SW480	Colon Cancer	-	ATCC
AsPC1	Pancreatic Cancer	-	ATCC
BxPC-3	Pancreatic Cancer	-	ATCC
PANC-1	Pancreatic Cancer	-	ATCC
CFPAC-1	Pancreatic Cancer	-	ATCC
MKN-45	Gastric Cancer	-	ATCC
MeT-5A	Normal Mesothelial	-	ATCC
IMR-90	Normal Lung Fibroblast	-	ATCC
MRC-5	Normal Lung Fibroblast	-	ATCC
WI-38	Normal Lung Fibroblast	-	ATCC
HumFib	Normal Human Fibroblast	-	ADDRI Biobank
Table S1. List of cell lines used in the current study

## Sheet: Table S2
CircRNA ID	Forward Primer Sequence(5' to 3')	Reverse Primer Sequence (5' to 3')	Probe Sequence (5' to 3')	Probe Label	Product Length (bp)	Tm (°C)
hsa_circ_0007386	CCG GAC AGC TAT GAA ACT C	CTT CAC AGC GGG CCT T	TGC CAA CAA GAA GAG AAG CC	FAM	98	60
hsa_circ_0006294	CCA AGT CAG GAT ATG TGC C	CAC TTA TCC CAT GCT TTC C	CAG CTT TAA AGA GAA TTG AAG TGT T	FAM	88	60
hsa_circ_0002346	CCG GAC AGC TAT GAA ACT C	AGC CAG CAA TAA GGT TTT C	CAA CAA GAT GAG AAC TGG ACT GA	FAM	128	60
hsa_circ_0002348	ACC CTG TGA AAG TGC CTG	GCA GCC AGC AAT AAG GTT	TGT GCG AAG ATG AGA ACT GGA	FAM	110	60
hsa_circ_0006349	ACT ACA ACG TGG CTA TCC C	GCT TGT CTT GCG GAG GT	CAC TTC CGC TTC CAT GTT T	FAM	102	60
hsa_circ_0084021	AGA AAG ATA TGA AGG ACT GGG	AAT GGA GTT TTT GGT TTC TGT	AAG CCA GCA AGA TCA CCG T	FAM	94	60
hsa_circ_0001829	TGA TGT TTG GCA GGG AGT T	AGG TGG TCC GCT GGT AAT	TGT TGC AGA TTG ATC ATC CAG TC	FAM	109	60
hsa_circ_0006646	CAG TGT GAG GGA GAA GTA TGA	AGG TAA GCA GCT GCC ATT	CAG AGG AGT GGA AAA TAT GAC AGA T	FAM	97	60
hsa_circ_0000284	GTC GGC CAG TCA TGT ATC A	TTC ACA CTA CAA AAG GCA CTT	AAT CTC GGT ACT ACA GGT ATG GC	HEX	133	60
GAPDH	CCC CGG TTT CTA TAA ATT GA	CTT CCC CAT GGT GTC TGA G	CTC TCT GCT CCT CCT GTT CGA C	FAM	124	60
Table S2. List of primer and probe sequences used for ddPCR circRNA detection experiments
