# Supplementary material
Source: Research Square preprint supplement (doi:10.21203/rs.3.rs-9625420/v1)
Supplement: Supplementary file 2 [file e1caac919ea95966a49a871f.xlsx]

## Sheet: Table 1
CircRNA ID	FC	P-value	Chromosome	CircRNA Type	Gene Name
hsa_circ_0084021	5.8786	0.0189513	chr8	exonic	PLEKHA2
hsa_circ_0006349	4.8157	0.000456211	chr1	exonic	TMEM39B
hsa_circ_0007386	4.3901	0.0176047	chr2	exonic	CRIM1
hsa_circ_0002346	4.1022	0.0103763	chr2	exonic	CRIM1
hsa_circ_0002348	4.0172	0.00698051	chr2	exonic	CRIM1
hsa_circ_0006646	2.6251	0.0143513	chr8	exonic	PTK2
hsa_circ_0001829	1.7661	0.0452104	chr8	exonic	SLC45A4
Table 1. List of eight upregulated circRNA candidates selected for biomarker validation. FC refers to fold-change in circRNA expression in the PM cell group with respect to the non-malignant mesothelial cell control group.

## Sheet: Table 2
CircRNA ID	PM vs Non-malignant FC (mean ± SD)	PM vs Other Cancer FC (mean ± SD)	Other Cancer vs Non-malignant FC (mean ± SD)
hsa_circ_0007386	2.20 ± 3.30 **	5.04 ± 7.57 ****	0.44 ± 0.44 ****
hsa_circ_0006294	1.47 ± 1.66 *	5.33 ± 6.01 ****	0.28 ± 0.31 ****
hsa_circ_0002346	1.43 ± 1.35 *	4.79 ± 4.50 ****	0.30 ± 0.26 ***
hsa_circ_0002348	1.32 ± 1.77 NS	3.68 ± 4.94 ****	0.36 ± 0.33 ***
hsa_circ_0006349	1.13 ± 1.30 NS	1.92 ± 2.21 **	0.59 ± 0.55 NS
hsa_circ_0084021	2.69 ± 2.95 ****	2.89 ± 3.17 ****	0.93 ± 1.06 NS
hsa_circ_0001829	4.29 ± 2.72 ****	0.54 ± 0.34 ***	7.96 ± 7.42 ****
hsa_circ_0006646	5.53 ± 5.72 ****	1.78 ± 1.83 **	3.12 ± 2.50 ****
Table 2. Summary of differential circRNA expression between PM, other cancer and non-malignant cell groups. FC refers to the fold-change in circRNA expression. *, **, ***, **** represent a p-value <0.05, <0.005, <0.0005 and <0.00005, respectively. NS depicts no statistical significance.

## Sheet: Table 3
CircRNA ID	PM vs Lung Cancer FC (mean ± SD)	PM vs Breast Cancer FC (mean ± SD)	PM vs Colorectal Cancer FC (mean ± SD)	PM vs Pancreatic Cancer FC (mean ± SD)	PM vs Gastric Cancer FC (mean ± SD)
hsa_circ_0007386	2.65 ± 3.98 ****	2.91 ± 4.4 **	8.62 ± 12.94 ****	6.23 ± 9.37 ****	28.83 ± 43.32 ****
hsa_circ_0006294	5.36 ± 6.05 ****	3.50 ± 3.95 ****	23.82 ± 26.89 ****	3.33 ± 3.75 ****	32.71 ± 36.93 ****
hsa_circ_0002346	3.29 ± 3.09 ****	3.65 ± 3.44 ****	10.74 ± 10.11 ****	5.66 ± 5.33 ****	25.69 ± 24.17 ****
hsa_circ_0002348	2.37 ± 3.18 ***	4.58 ± 6.14 ****	6.11 ± 8.20 ****	3.92 ± 5.26 ****	38.89 ± 52.18 ****
hsa_circ_0006349	1.31 ± 1.52 NS	1.86 ± 2.15 *	2.83 ± 3.26 ***	2.73 ± 3.15 **	3.22 ± 3.71 *
hsa_circ_0084021	3.89 ± 4.28 ****	3.59 ± 3.94 ****	3.92 ± 4.31 ****	1.49 ± 1.64 NS	6.61 ± 7.26 ****
hsa_circ_0001829	0.68 ± 0.43 NS	0.43 ± 0.27 NS	0.53 ± 0.34 ****	0.71 ± 0.45 NS	0.23 ± 0.14 **
hsa_circ_0006646	2.30 ± 2.38 ***	0.98 ± 1.02 NS	2.05 ± 2.12 ***	2.27 ± 2.35 ***	1.27 ± 1.31 NS
Table 3. Summary of differential circRNA expression between PM and specific other cancer type cell groups. FC refers to the fold-change in circRNA expression. *, **, ***, **** represent a p-value of <0.05, <0.005, <0.0005 and <0.00005, respectively. NS depicts no statistical significance.

## Sheet: Table 4
Diagnostic Test	CircRNA Signature ID	Threshold	Sensitivity (%)	Specificity (%)	AUC	CI (95%)
Cancer vs Non-malignant	hsa_circ_0001829, hsa_circ_0006646	0.42759	87	87	0.937	0.90-0.97
	hsa_circ_0001829, hsa_circ_0006646, hsa_circ_0006349	0.508652	83	93	0.934	0.89-0.97
	hsa_circ_0001829, hsa_circ_0006646, hsa_circ_0002348	0.560856	84	100	0.933	0.89-0.97
	hsa_circ_0001829, hsa_circ_0006646, hsa_circ_0002348, hsa_circ_0006349	0.581919	82	100	0.933	0.89-0.97
	hsa_circ_0001829	0.077797	84	87	0.924	0.88-0.96
	hsa_circ_0001829, hsa_circ_0006646, hsa_circ_0084021	0.64189	85	87	0.915	0.87-0.96
	hsa_circ_0001829, hsa_circ_0006349, hsa_circ_0006646, hsa_circ_0084021	0.672952	84	87	0.913	0.86-0.96
	hsa_circ_0001829, hsa_circ_0006349	0.099165	80	87	0.911	0.86-0.96
	hsa_circ_0001829, hsa_circ_0006646, hsa_circ_0084021, hsa_circ_0002348	0.735116	82	87	0.908	0.89-0.97
	hsa_circ_0001829, hsa_circ_0006646, hsa_circ_0084021, hsa_circ_0002348, hsa_circ_0006349	0.736219	84	87	0.908	0.85-0.96
PM vs Other Cancer	hsa_circ_0007386, hsa_circ_0006294, hsa_circ_0002346, hsa_circ_0002348	2.79283	80	87	0.921	0.87-0.96
	hsa_circ_0007386, hsa_circ_0006294, hsa_circ_0002346, hsa_circ_0002348, hsa_circ_0006349	2.79713	80	87	0.92	0.87-0.96
	hsa_circ_0007386, hsa_circ_0006294, hsa_circ_0002346, hsa_circ_0002348, hsa_circ_0084021	2.91099	80	85	0.92	0.88-0.96
	hsa_circ_0007386, hsa_circ_0006294, hsa_circ_0002346, hsa_circ_0002348, hsa_circ_0084021, hsa_circ_0006349	2.91529	80	85	0.919	0.87-0.96
	hsa_circ_0007386, hsa_circ_0006294, hsa_circ_0002346	2.73283	79	87	0.919	0.87-0.96
	hsa_circ_0007386, hsa_circ_0006294, hsa_circ_0002346, hsa_circ_0006349	2.73713	79	87	0.918	0.87-0.96
	hsa_circ_0007386, hsa_circ_0006294, hsa_circ_0002346, hsa_circ_0006349, hsa_circ_0084021	2.86529	80	85	0.917	0.87-0.96
	hsa_circ_0007386, hsa_circ_0006294, hsa_circ_0002346, hsa_circ_0084021	2.86099	80	85	0.917	0.87-0.96
	hsa_circ_0007386, hsa_circ_0002346, hsa_circ_0002348	2.65986	79	87	0.917	0.87-0.96
	hsa_circ_0007386, hsa_circ_0002346, hsa_circ_0002348, hsa_circ_0084021	2.78802	80	85	0.916	0.87-0.96
Table 4. Summary of the specificity, sensitivity and area under the curve (AUC) values of the top ten circRNA biomarker signatures
