# Supplementary material
Source: Research Square preprint supplement (doi:10.21203/rs.3.rs-9625420/v1)
Supplement: Supplementary file 3 [file eddeb89dd3e82078740c9bd0.xlsx]

## Sheet: GSEA GO BP
pathway GO_BP_ID msigdb_id size_num_pathway_genes_found Enrichment_Score_ES Normalized_Enrichment_Score_NES pval padj leadingEdge_core_genes_used_in_Enrichment_Score gs_description gs_url db_version regulation
GOBP_CYTOPLASMIC_TRANSLATION GO:0002181 M10085 100 -0.522024256068773 -2.0383252831223757 1.516767742095571e-6 0.0034172777229413216 RPL13A	EIF3F	RPS6	RPS5	EIF3E	PABPC1	RPL37A	RPL17	RPL5	RPL11	RPS11	RPL10A	RPS21	RPLP0	RPL31	RPS2	RPL19	RPL7A	EIF4B	EIF3L	EIF4A1	RPS27	RPS19	RPL35A	RPL27	RPL18A	EIF3D	RPLP1	RPS16	RPS14	RPS12	RPS3	EEF2	SLBP	RPS15A	EIF2S3	RPS29	EIF3H	ETF1	EIF3M	DRG1	RPS4X The chemical reactions and pathways resulting in the formation of a protein in the cytoplasm. This is a ribosome-mediated process in which the information in messenger RNA (mRNA) is used to specify the sequence of amino acids in the protein. [GOC:hjd] http://amigo.geneontology.org/amigo/term/GO:0002181 2025.1.Hs down
GOBP_TRANSLATION GO:0006412 M11989 297 -0.3668210117441409 -1.6535805118139941 1.0386247098288005e-5 0.011700107356221437 EIF4ENIF1	WARS2	EEF1A1	RPL13A	GAPDH	TCF25	EIF3F	RPS6	RPS5	CDK5RAP1	EIF3E	PABPC1	RPL37A	RPL17	RPL5	RPL11	HSPB1	RPS11	CAPRIN1	RPL10A	RPS21	THBS1	RPLP0	RPL31	RPS2	PUM2	RPL19	RPL7A	EIF4B	EIF3L	EIF4A1	RPS27	RPS19	RPL35A	RPL27	RPL18A	RPS27L	EIF3D	RPLP1	METAP2	RPS16	EEFSEC	APEH	EIF4A3	ALKBH5	APP	GADD45GIP1	ENC1	EIF2AK1	EIF2AK3
GOBP_PROTEIN_RNA_COMPLEX_ORGANIZATION GO:0071826 M13539 101 -0.475282786213935 -1.8584198652678015 3.8474751968782325e-5 0.028894538728555526 DICER1	RPL13A	EIF3F	RPS6	RPS5	EIF3E	RPL5	HSP90AA1	RPL11	EIF4B	EIF3L	RPS27	RPS19	RPS27L	EIF3D	KIF5B	ATM	RPS14	BRIX1	KLC1	HSP90AB1	VCP	EIF2S3	EIF3H	EIF3M	RUVBL1 Any process in which macromolecules aggregate	disaggregate	or are modified	resulting in the formation	disassembly	or alteration of a ribonucleoprotein complex. [GOC:mah] http://amigo.geneontology.org/amigo/term/GO:0071826 2025.1.Hs down
GOBP_REGULATION_OF_PROTEIN_TRANSPORT GO:0051223 M48478 147 -0.4123846499207984 -1.7108513397561569 7.530134546538053e-5 0.042413482833375586 RBM22	RPH3AL	PER2	BARD1	STX1A	HSP90AA1	HIF1A	PPP3CB	CHP1	PTPN11	UBR5	PPIA	RAB11FIP3	EI24	GAPVD1	SEC24A	KIF20B	YWHAE	ADAM9	APP	RANGAP1	ITPR1	EDEM2	SUFU	CPT1A	FRMD4A	PKDCC	WLS	VEGFC	TGFB1	PRKCA	JUP	UNC13B	TM9SF4	RFX3	NDEL1	EP300	RAB11FIP1	EDEM1	VPS35	PSEN1	EPM2A	PIK3R1	NF1	GOLPH3L	HDAC3	RAC1	PTPN14	GNAI1	PRKCB
GOBP_REGULATION_OF_ESTABLISHMENT_OF_PROTEIN_LOCALIZATION GO:0070201 M42902 190 -0.38591533513115195 -1.6526622792468366 1.1402732161502256e-4 0.05138071111972917 RBM22	FBXW7	ABLIM3	RPH3AL	PER2	BARD1	STX1A	HSP90AA1	HIF1A	PPP3CB	CHP1	PTPN11	UBR5	PPIA	RAB11FIP3	EI24	GAPVD1	BNIP3L	USP7	PRNP	SEC24A	HUWE1	KIF20B	YWHAE	ADAM9	APP	RANGAP1	ITPR1	CEP135	VPS11	EDEM2	HPS4	SUFU	CPT1A	FRMD4A	PKDCC	WLS	VEGFC	TGFB1	PRKCA	JUP	NPEPPS	UNC13B	UBE2J2	TM9SF4	RFX3	CCT6A	NDEL1	EP300	RAB11FIP1
GOBP_NEGATIVE_REGULATION_OF_PROTEOLYSIS GO:0045861 M10339 46 -0.5475401526617989 -1.8301111899708102 3.700330060691637e-4 0.10421054533422823 TIMP1	GAPDH	RPL5	RPL11	CAMLG	THBS1	CST3	USP7	PRNP	HIPK2	SUFU	HSP90AB1	EIF3H Any process that stops	prevents	or reduces the frequency	rate or extent of the hydrolysis of a peptide bond or bonds within a protein. [GOC:go_curators] http://amigo.geneontology.org/amigo/term/GO:0045861 2025.1.Hs down
GOBP_REGULATION_OF_PROTEIN_SECRETION GO:0050708 M12257 72 -0.4961627147599092 -1.81196088134623 3.6738643237120794e-4 0.10421054533422823 RPH3AL	PER2	STX1A	HIF1A	PPP3CB	PTPN11	PPIA	RAB11FIP3	SEC24A	ADAM9	ITPR1	CPT1A	FRMD4A	WLS	VEGFC	TGFB1	PRKCA	UNC13B	RFX3	RAB11FIP1	VPS35	GOLPH3L	RAC1	GNAI1	PRKCB	GOLPH3 Any process that modulates the frequency	rate or extent of the controlled release of a protein from a cell. [GOC:ai] http://amigo.geneontology.org/amigo/term/GO:0050708 2025.1.Hs down
GOBP_RIBONUCLEOPROTEIN_COMPLEX_BIOGENESIS GO:0022613 M16027 194 -0.3762223459546054 -1.6193232257978194 2.8147681315730366e-4 0.10421054533422823 DICER1	RPL13A	EIF3F	RPS6	RPS5	EIF3E	RPL5	HSP90AA1	RPL11	RPS11	RPS21	NOL10	RPLP0	RPL7A	EIF4B	EIF3L	RPS27	RPS19	RPL35A	RPL27	DDX17	RPS27L	EIF3D	DDX31	RPS16	EIF4A3	ATM	NOM1	RPS14	RPS12	ERCC2	BRIX1	HSP90AB1	RPS15A	EIF2S3	EIF3H	EIF3M	RUVBL1	RPS4X A cellular process that results in the biosynthesis of constituent macromolecules	assembly	and arrangement of constituent parts of a complex containing RNA and proteins. Includes the biosynthesis of the constituent RNA and protein molecules	and those macromolecular modifications that are involved in synthesis or assembly of the ribonucleoprotein complex. [GOC:isa_complete	GOC:mah] http://amigo.geneontology.org/amigo/term/GO:0022613 2025.1.Hs down
GOBP_DEVELOPMENTAL_PROCESS_INVOLVED_IN_REPRODUCTION GO:0003006 M14904 293 0.33307106106391726 1.49407838181636 6.536578951243117e-4 0.16363235974611937 CDYL	RAD23B	DLG1	DAZAP1	GAS2	POC1B	RHOBTB3	CRIP1	ZFP57	RHBDD1	KRT19	STAU2	EIF2S2	NRIP1	TBP	UBE3A	FXR1	CFAP44	FLNA	TIPARP	ASH1L	DHCR24	STK3	KRT8	SSH2	PRKDC	CCNYL1	CALR	FOXJ3	RAN	TCFL5	FBXW11	CCNY	CCND1	SMARCC1	USP9Y	SLIT2	PPP2R1A	CREM	EAF2	ABHD2	FANCA	KATNAL1	SMARCA2	CENPI	NDRG3	AXL	AFF4	HERC4	SUN1
GOBP_POSITIVE_REGULATION_OF_PROTEIN_SECRETION GO:0050714 M16633 45 -0.5260269795689504 -1.7512009812428462 0.0013999090646241166 0.2628329268831779 RPH3AL	HIF1A	PPP3CB	PPIA	SEC24A	ADAM9	ITPR1	FRMD4A	WLS	VEGFC	TGFB1	PRKCA	UNC13B	VPS35	GOLPH3L	RAC1	PRKCB	GOLPH3	DYNLL1 Any process that activates or increases the frequency	rate or extent of the controlled release of a protein from a cell. [GOC:ai] http://amigo.geneontology.org/amigo/term/GO:0050714 2025.1.Hs down
GOBP_ENDOPLASMIC_RETICULUM_TO_GOLGI_VESICLE_MEDIATED_TRANSPORT GO:0006888 M12529 65 -0.4702417224821777 -1.6796617674480714 0.0012147220335985915 0.2628329268831779 VAPB	SEC23A	STX5	RAB2A	TRAPPC4	SEC24A	P4HB	TMED4	USO1	TRAPPC9	RABGGTA	PGAP1	VCP	SEC22C	SEC13	VAPA	ARCN1	ERGIC2	YIF1A	LMAN2L	TFG	COPA	COPB2	RABGGTB	STX18	PREB	GBF1	SEC23IP The directed movement of substances from the endoplasmic reticulum (ER) to the Golgi	mediated by COP II vesicles. Small COP II coated vesicles form from the ER and then fuse directly with the cis-Golgi. Larger structures are transported along microtubules to the cis-Golgi. [GOC:ascb_2009	GOC:dph	GOC:jp	GOC:tb	ISBN:0716731363] http://amigo.geneontology.org/amigo/term/GO:0006888 2025.1.Hs down
GOBP_REGULATION_OF_CELLULAR_LOCALIZATION GO:0060341 M13054 391 -0.30243539009294146 -1.4005889932744937 0.001305860216677411 0.2628329268831779 RBM22	FBXW7	ABLIM3	RPH3AL	FNTA	PER2	ACTB	BARD1	NCKAP1	STX1A	HSP90AA1	HIF1A	PPP3CB	SSH1	CHP1	PUM2	WWTR1	GPSM2	PTPN11	UBR5	PPIA	JAK1	RALGAPA2	CEP250	RAB11FIP3	EI24	MMD	GAPVD1	BNIP3L	KIF5B	USP7	SUMO3	PRNP	SEC24A	YAP1	HUWE1	TFRC	KIF20B	ALKBH5	PPFIA1	YWHAE	ADAM9	APP	TERT	VCL	NUP153	DYNC1H1	RANGAP1	EHD2	EIF2AK3
GOBP_PROTEIN_STABILIZATION GO:0050821 M13097 94 -0.4164603128008261 -1.6072172764693302 0.0020220150344122815 0.3504307594254516 HIP1	GAPDH	FBXW7	CREB1	OTUD3	NCKAP1	RPL5	HSP90AA1	RPL11	CAMLG	CHP1	PHB2	PFDN2	ATP1B3	USP7	STXBP1	UBR4	HPS4	HSP90AB1	AAK1	RUVBL1	IFT46	GRN	PEX6	CCT6A	EP300 Any process involved in maintaining the structure and integrity of a protein and preventing it from degradation or aggregation. [GOC:ai] http://amigo.geneontology.org/amigo/term/GO:0050821 2025.1.Hs down
GOBP_BIOLOGICAL_PROCESS_INVOLVED_IN_SYMBIOTIC_INTERACTION GO:0044403 M34173 67 -0.47031840902304617 -1.698059290796783 0.0023429682209987527 0.3519138267940126 FN1	UVRAG	GAPDH	VAPB	PPIA	EXOC7	CHMP4A	CHMP5	GPX1	TFRC	ITGB5	P4HB	TRIM62	NUP153	ITGA5	HSP90AB1	EPS15	CBL	VAPA	RAB7A	KIAA0319L	SLC20A2	SCARB1	PPARA	ICAM1	ARL8B	ITCH	CHMP3 A process carried out by gene products in an organism that enable the organism to engage in a symbiotic relationship	a more or less intimate association	with another organism. The various forms of symbiosis include parasitism	in which the association is disadvantageous or destructive to one of the organisms; mutualism	in which the association is advantageous	or often necessary to one or both and not harmful to either; and commensalism	in which one member of the association benefits while the other is not affected. However	mutualism	parasitism	and commensalism are often not discrete categories of interactions and should rather be perceived as a continuum of interaction ranging from parasitism to mutualism. In fact	the direction of a symbiotic interaction can change during the lifetime of the symbionts due to developmental changes as well as changes in the biotic/abiotic environment in which the interaction occurs. Microscopic symbionts are often referred to as endosymbionts. [GOC:cc	PMID:31257129] http://amigo.geneontology.org/amigo/term/GO:0044403 2025.1.Hs down
GOBP_POSITIVE_REGULATION_OF_ESTABLISHMENT_OF_PROTEIN_LOCALIZATION GO:1904951 M16565 129 -0.3806601921759628 -1.5409355953554194 0.0022275961383848627 0.3519138267940126 RBM22	FBXW7	ABLIM3	RPH3AL	HSP90AA1	HIF1A	PPP3CB	CHP1	UBR5	PPIA	PRNP	SEC24A	HUWE1	KIF20B	YWHAE	ADAM9	APP	ITPR1	CEP135	VPS11	EDEM2	HPS4	FRMD4A	WLS	VEGFC	TGFB1	PRKCA	JUP	NPEPPS	UNC13B	UBE2J2	TM9SF4	CCT6A	EP300	EDEM1	VPS35	PSEN1	PIK3R1	GOLPH3L	HDAC3	RAC1	UBL5	PINK1	PRKCB	GOLPH3	PCNT	GLI3 Any process that activates or increases the frequency	rate or extent of establishment of protein localization. [GO_REF:0000058	GOC:TermGenie	PMID:22761445] http://amigo.geneontology.org/amigo/term/GO:1904951 2025.1.Hs down
GOBP_BIOLOGICAL_PROCESS_INVOLVED_IN_INTERSPECIES_INTERACTION_BETWEEN_ORGANISMS GO:0044419 M42801 483 -0.28002890678276954 -1.3211190662623065 0.0034009968027575205 0.4789028622882934 FN1	EEF1A1	MX1	TPT1	UVRAG	RPL13A	GAPDH	VIM	MLH1	PCBP2	DDIT4	HSP90AA1	HIF1A	PPT1	HSPB1	HK1	VAPB	EXT1	HDAC5	ST13	SEC11A	PUM2	IRAK3	SLAMF6	RBPJ	CEP192	PTPN11	RPS19	PPIA	PHB2	EXOC7	JAK1	MAPKAPK2	DDX17	FBXO9	BCR	BNIP3L	ZMYND11	IFNGR2	KIF5B	CHMP4A	USP7	CHMP5	GPX1	TFRC	FKBP5	ITGB5	NPLOC4	P4HB	STXBP1
GOBP_REPRODUCTIVE_SYSTEM_DEVELOPMENT GO:0061458 M12778 103 0.4080512277298065 1.5976271764206926 0.0036420033787131554 0.4825000322371352 DLG1	GAS2	RHOBTB3	CRIP1	EIF2S2	NRIP1	UBE3A	FLNA	TIPARP	ASH1L	DHCR24	CCND1	SMARCC1	SLIT2	EAF2	FANCA	AXL	ACVR2A	ZFY	BAX	NUP107	GREB1L	PSAP	SERPINE2	CTNNA1	NUP210L	CHD7	DMC1	GFRA1	NDUFS6	FOXO3	NASP The progression of the reproductive system over time from its formation to the mature structure. The reproductive system consists of the organs that function in reproduction. [GOC:dph] http://amigo.geneontology.org/amigo/term/GO:0061458 2025.1.Hs up
GOBP_POSITIVE_REGULATION_OF_PROTEIN_TRANSPORT GO:0051222 M48477 95 -0.41171271133778936 -1.5845177819529566 0.003854860443971786 0.4825000322371352 RBM22	RPH3AL	HSP90AA1	HIF1A	PPP3CB	CHP1	UBR5	PPIA	SEC24A	KIF20B	YWHAE	ADAM9	APP	ITPR1	EDEM2	FRMD4A	WLS	VEGFC	TGFB1	PRKCA	JUP	UNC13B	TM9SF4	EP300	EDEM1	VPS35	PSEN1	PIK3R1	GOLPH3L	HDAC3	RAC1	PRKCB	GOLPH3	PCNT	GLI3 Any process that activates or increases the frequency	rate or extent of the directed movement of a protein into	out of or within a cell	or between cells	by means of some agent such as a transporter or pore. [GOC:ai] http://amigo.geneontology.org/amigo/term/GO:0051222 2025.1.Hs down
GOBP_MITOTIC_CYTOKINETIC_PROCESS GO:1902410 M25071 17 -0.6845853487985246 -1.8403809635392336 0.004564477068398776 0.49572381869260046 EXOC7	RAB11FIP3	CHMP4A	CHMP5	KIF20B	MTMR3	RHOA	PDCD6IP	CHMP3	CNTROB Any cytokinetic process that is involved in mitotic cell cycle. [GOC:mtg_cell_cycle	GOC:TermGenie] http://amigo.geneontology.org/amigo/term/GO:1902410 2025.1.Hs down
GOBP_REGULATION_OF_BLOOD_PRESSURE GO:0008217 M10469 38 -0.5230565987265927 -1.7014380833490814 0.00462059484800027 0.49572381869260046 ATP2B1	SNX5	RPS6KA2	NAV2	ECE1	EXT1	WNK1	BMPR2	VEGFC	RNLS	PPARA	COL1A2	RHOA Any process that modulates the force with which blood travels through the circulatory system. The process is controlled by a balance of processes that increase pressure and decrease pressure. [GOC:dph	GOC:mtg_cardio	ISBN:0721643949] http://amigo.geneontology.org/amigo/term/GO:0008217 2025.1.Hs down
GOBP_PROTEIN_LOCALIZATION_TO_ORGANELLE GO:0033365 M14653 449 -0.27811227225377644 -1.3029678115994718 0.004407210030673446 0.49572381869260046 RBM22	EIF4ENIF1	FBXW7	ABLIM3	BARD1	HSP90AA1	NOMO1	RPL11	CAMLG	HK1	PPP3CB	CHP1	WWTR1	PITRM1	IFFO1	GPSM2	CEP192	UBR5	POM121	PHB2	JAK1	LONP2	CEP250	TULP2	RAB11FIP3	ARL1	EI24	BNIP3L	E2F3	EMC1	TNPO3	CHMP4A	USP7	SUMO3	SRGN	NOMO3	YAP1	HUWE1	TFRC	KIF20B	SPATA7	YWHAE	APP	CHCHD10	SRP68	TERT	NUP153	RANGAP1	EIF2AK1	EIF2AK3
GOBP_REGULATION_OF_SUBSTRATE_ADHESION_DEPENDENT_CELL_SPREADING GO:1900024 M12343 30 0.5793371299774428 1.7806631935929822 0.005507233397881543 0.5097596212013902 ACTN4	PTK2	FERMT2	CORO1C	FLNA	CALR	UNC13D	RREB1	ABL1 Any process that modulates the frequency	rate or extent of substrate adhesion-dependent cell spreading. [GOC:TermGenie	GOC:yaf] http://amigo.geneontology.org/amigo/term/GO:1900024 2025.1.Hs up
GOBP_RIBOSOME_ASSEMBLY GO:0042255 M11348 32 -0.5548490577390828 -1.7161308651783755 0.006559868640324659 0.5097596212013902 RPS6	RPS5	RPL5	RPL11	RPS27	RPS19	RPS27L	RPS14	BRIX1 The aggregation	arrangement and bonding together of the mature ribosome and of its subunits. [GOC:ma	PMID:30467428] http://amigo.geneontology.org/amigo/term/GO:0042255 2025.1.Hs down
GOBP_REGULATION_OF_IMMUNOGLOBULIN_PRODUCTION GO:0002637 M12231 24 -0.584255942322663 -1.712638925582693 0.007692777239612634 0.5097596212013902 GALNT2	MLH1	PHB2	GPI	TFRC	IL27RA	HMCES	TP53BP1	TGFB1 Any process that modulates the frequency	rate	or extent of immunoglobulin production. [GOC:add] http://amigo.geneontology.org/amigo/term/GO:0002637 2025.1.Hs down
GOBP_BONE_MINERALIZATION GO:0030282 M12864 40 -0.5064496339733153 -1.652395655269185 0.006584831731613854 0.5097596212013902 ATP2B1	HIF1A	AXIN2	SRGN	RUNX2	LTBP3	EIF2AK3	ERCC2	PTN	BMPR2	PKDCC	SLC20A2	COL6A1	COL1A2	DDR2	ANO6	TXLNG	NBR1	TMEM38B	MEF2C	ANKH	ACVR2B The deposition of hydroxyapatite	a form of calcium phosphate with the formula Ca10(PO4)6(OH)2	in bone tissue. [GOC:mah	PMID:22936354] http://amigo.geneontology.org/amigo/term/GO:0030282 2025.1.Hs down
GOBP_RIBOSOMAL_SMALL_SUBUNIT_BIOGENESIS GO:0042274 M12963 49 -0.484106440879469 -1.6420799541770819 0.006376672863049465 0.5097596212013902 RPS6	RPS5	RPS11	RPS21	NOL10	RPS27	RPS19	RPS27L	RPS16	NOM1	RPS14	RPS12	ERCC2	RPS15A	RPS4X A cellular process that results in the biosynthesis of constituent macromolecules	assembly	and arrangement of constituent parts of a small ribosomal subunit; includes transport to the sites of protein synthesis. [GOC:jl] http://amigo.geneontology.org/amigo/term/GO:0042274 2025.1.Hs down
GOBP_REGULATION_OF_INTRINSIC_APOPTOTIC_SIGNALING_PATHWAY GO:2001242 M16230 64 -0.43482761216700355 -1.5516625918305302 0.00525547415683553 0.5097596212013902 TPT1	FBXW7	CD44	CREB3L1	HIF1A	HSPB1	PPIA	EI24	GPX1	P4HB	APP	SERINC3	ENO1	EIF2AK3	RPS3 Any process that modulates the frequency	rate or extent of intrinsic apoptotic signaling pathway. [GOC:mtg_apoptosis] http://amigo.geneontology.org/amigo/term/GO:2001242 2025.1.Hs down
GOBP_PROTEIN_LOCALIZATION_TO_EXTRACELLULAR_REGION GO:0071692 M42927 109 -0.386394493822665 -1.531683406881708 0.0071788320823284206 0.5097596212013902 RPH3AL	LTBP1	PER2	STX1A	HIF1A	PPP3CB	PTPN11	PPIA	RAB11FIP3	FBN1	SEC24A	TVP23C	ADAM9	ITPR1	SNX19	CPT1A	FRMD4A	WLS	VEGFC	AP1B1	TGFB1	PRKCA	LTBP2	UNC13B	PDIA4	RFX3	NAGPA	RAB11FIP1	VPS35	GOLPH3L	RAC1	PLEK	IL1RN	GNAI1	PRKCB	GOLPH3 Any process in which a protein is transported from one specific location in the extracellular region to another	or maintained in a specific extracellular location. [GOC:mah] http://amigo.geneontology.org/amigo/term/GO:0071692 2025.1.Hs down
GOBP_MYELOID_LEUKOCYTE_ACTIVATION GO:0002274 M12762 74 -0.4133324183394249 -1.5234074352294544 0.0063377525800133415 0.5097596212013902 FN1	DNASE1	THBS1	RBPJ	PTPN11	BCR	IFNGR2	STXBP1	ADAM9	APP	HSPA12A	CBL	GPR137B	TGFB1	TLR1	SPI1	PLA2G4A	PREX1	GRN A change in the morphology or behavior of a myeloid leukocyte resulting from exposure to an activating factor such as a cellular or soluble ligand. [GOC:add	ISBN:0781735149] http://amigo.geneontology.org/amigo/term/GO:0002274 2025.1.Hs down
GOBP_NEGATIVE_REGULATION_OF_CYTOKINE_PRODUCTION GO:0001818 M16054 84 -0.39976809376908184 -1.5006066127285613 0.006461295515296252 0.5097596212013902 FN1	DICER1	ATP2B1	TNFRSF21	THBS1	IRAK3	PTPN11	NPTN	SRGN	PRNP	YY1	NPLOC4	IL27RA	GSTP1	NFKB1	TGFB1	PRKCA	ELF4	GPATCH3	PPARA	PTPRS	STAT3	IKBKB	ITCH	LILRA5	HDAC3	RAC1	OTUD5	TWSG1 Any process that stops	prevents	or reduces the rate of production of a cytokine. [GOC:add	ISBN:0781735149] http://amigo.geneontology.org/amigo/term/GO:0001818 2025.1.Hs down
GOBP_REGULATION_OF_SMALL_GTPASE_MEDIATED_SIGNAL_TRANSDUCTION GO:0051056 M11142 157 0.3493880505438263 1.4587207154567061 0.007338578945724076 0.5097596212013902 FERMT2	SQSTM1	TRIO	ARHGEF12	ARHGAP11B	TNS3	CADM4	ARHGEF28	FXR1	PICALM	ARHGAP23	MYO9A	MYO9B	ARHGAP12	RALGPS1	ARHGAP1	ABL2	FAM13B	MET	ARFGEF3	DOCK7	DENND3	DENND1A	DNMBP	SLIT2	ABL1	RASGRF2	ARHGEF2	OBSCN	ROBO1	PLEKHG4B	ABR Any process that modulates the frequency	rate or extent of small GTPase mediated signal transduction. [GOC:go_curators] http://amigo.geneontology.org/amigo/term/GO:0051056 2025.1.Hs up
GOBP_POSITIVE_REGULATION_OF_PROTEIN_LOCALIZATION GO:1903829 M11085 213 -0.3202754719605814 -1.3923863148883429 0.007651689285356041 0.5097596212013902 RBM22	FBXW7	ABLIM3	RPH3AL	FNTA	HSP90AA1	HIF1A	PPP3CB	SSH1	CHP1	WWTR1	GPSM2	UBR5	PPIA	JAK1	CEP250	KIF5B	PRNP	SEC24A	YAP1	HUWE1	TFRC	KIF20B	YWHAE	ADAM9	APP	TERT	EIF2AK3	ITPR1	CEP135	FARP1	VPS11	EDEM2	HPS4	FRMD4A	HSP90AB1	WLS	VEGFC	GPR137B	CRKL	TGFB1	KAT7	PRKCA	JUP	TYK2	NPEPPS	NF2	UNC13B	UBE2J2	ATP2B4
GOBP_POSITIVE_REGULATION_OF_GENE_EXPRESSION GO:0010628 M40375 370 -0.28548166609862774 -1.3158642647807168 0.006470423458284655 0.5097596212013902 FN1	RBM22	EIF4ENIF1	GAPDH	CREB1	APEX1	RPS6KA2	CDK5RAP1	GALNT2	EIF3E	VIM	ARID1B	PABPC1	MLH1	RPL5	HSP90AA1	HIF1A	RPL11	CNN2	HSPB1	HK1	THBS1	PKD2	IRAK3	SLAMF6	RBPJ	PTPN11	UBR5	PHB2	MAPKAPK2	PRDX6	TCF12	RPS27L	AXIN2	GPI	YY1	EIF4A3	YAP1	TFRC	ATM	TLE1	APP	ENO1	RUNX2	OVOL2	IL27RA	EIF2AK3	CD276	STAT5B	HMCES
GOBP_REPRODUCTIVE_PROCESS GO:0022414 M48399 446 0.27790573641968863 1.2968531948362882 0.007414396574377904 0.5097596212013902 CDYL	RAD23B	DLG1	MYH9	DAZAP1	GAS2	ACTR2	POC1B	RHOBTB3	CRIP1	ZFP57	RHBDD1	KRT19	HSPG2	STAU2	EIF2S2	NRIP1	TBP	UBE3A	FXR1	GABRB3	CFAP44	ZNF148	FLNA	SKA3	PCSK5	TIPARP	ASH1L	DHCR24	STK3	P2RX1	KRT8	SSH2	PRKDC	CCNYL1	SMURF2	ANAPC1	CALR	FOXJ3	CCT3	RAN	MMP9	TCFL5	FBXW11	CCNY	CCND1	SMARCC1	USP9Y	SLIT2	TUBGCP3
GOBP_FIBROBLAST_GROWTH_FACTOR_RECEPTOR_SIGNALING_PATHWAY GO:0008543 M14806 24 -0.5822294486277753 -1.7066986317270323 0.008132351580598739 0.5109613285261962 CREB3L1	THBS1	EXT1	PTPN11	NPTN	RUNX2	CRKL	GRB2	KIF16B The series of molecular signals generated as a consequence of a fibroblast growth factor receptor binding to one of its physiological ligands. [GOC:ceb] http://amigo.geneontology.org/amigo/term/GO:0008543 2025.1.Hs down
GOBP_NEGATIVE_REGULATION_OF_MICROTUBULE_POLYMERIZATION_OR_DEPOLYMERIZATION GO:0031111 M23003 20 0.6010636099947875 1.6919457269412477 0.008164495262735492 0.5109613285261962 ATXN7	MID1	CLASP1	TBCD	NAV3	DYRK1A	ARHGEF2	DIAPH3	TAOK1	CLASP2	TTBK2	TPX2	EML2 Any process that stops	prevents	or reduces the frequency	rate or extent of microtubule polymerization or depolymerization. [GOC:mah] http://amigo.geneontology.org/amigo/term/GO:0031111 2025.1.Hs up
GOBP_VIRAL_RELEASE_FROM_HOST_CELL GO:0019076 M34112 15 -0.6605275798499848 -1.715262783122614 0.008639957729332463 0.5261033720050281 VAPB	PPIA	CHMP4A	CHMP5	TRIM62	VAPA	RAB7A	ARL8B	CHMP3	PC	DDB1 The dissemination of mature viral particles from a host cell	e.g. by cell lysis or the budding of virus particles from the cell membrane. [GOC:jl] http://amigo.geneontology.org/amigo/term/GO:0019076 2025.1.Hs down
GOBP_POSITIVE_REGULATION_OF_IMMUNOGLOBULIN_PRODUCTION GO:0002639 M13791 19 -0.6164856416579036 -1.697585383686013 0.011616775830779953 0.5305310589508409 GALNT2	MLH1	PHB2	GPI	TFRC	HMCES	TP53BP1	TGFB1 Any process that activates or increases the frequency	rate	or extent of immunoglobulin production. [GOC:add] http://amigo.geneontology.org/amigo/term/GO:0002639 2025.1.Hs down
GOBP_RESPONSE_TO_FIBROBLAST_GROWTH_FACTOR GO:0071774 M13039 32 -0.5381358543160375 -1.6644374472113928 0.010773669113221227 0.5305310589508409 CD44	CREB3L1	THBS1	EXT1	PTPN11	NPTN	RUNX2	CRKL	GRB2	KIF16B Any process that results in a change in state or activity of a cell or an organism (in terms of movement	secretion	enzyme production	gene expression	etc.) as a result of a fibroblast growth factor stimulus. [GOC:mah] http://amigo.geneontology.org/amigo/term/GO:0071774 2025.1.Hs down
GOBP_POSITIVE_REGULATION_OF_CALCIUM_ION_TRANSMEMBRANE_TRANSPORT GO:1904427 M12807 20 0.5865444020033809 1.6510753240235854 0.011695006716629921 0.5305310589508409 ASPH	CEMIP	P2RX1	PPP3CA	ABL1	VMP1	HTT	BAX	TRPC1	STIM1	STAC	PDPK1 Any process that activates or increases the frequency	rate or extent of calcium ion transmembrane transport. [GO_REF:0000058	GOC:TermGenie	PMID:22910094] http://amigo.geneontology.org/amigo/term/GO:1904427 2025.1.Hs up
GOBP_CARTILAGE_DEVELOPMENT GO:0051216 M10512 70 -0.42700208845535453 -1.5565906943669467 0.01028395238164439 0.5305310589508409 TIMP1	CD44	CSGALNACT1	EFEMP1	HIF1A	EXT1	PTPN11	AXIN2	RUNX2	LTBP3	EIF2AK3	POR	SNX19	BBS2	SMAD1	ZBTB16	BMPR2	PKDCC	TGFB1	BGN	RUNX1	TGFBR1	COL6A1	PRKG2	TRPS1 The process whose specific outcome is the progression of a cartilage element over time	from its formation to the mature structure. Cartilage elements are skeletal elements that consist of connective tissue dominated by extracellular matrix containing collagen type II and large amounts of proteoglycan	particularly chondroitin sulfate. [GOC:cjm	PMID:23251424] http://amigo.geneontology.org/amigo/term/GO:0051216 2025.1.Hs down
GOBP_BIOMINERAL_TISSUE_DEVELOPMENT GO:0031214 M45841 52 -0.4527344963583618 -1.5485057472885326 0.0095412575323469 0.5305310589508409 ATP2B1	HIF1A	AXIN2	SRGN	RUNX2	LTBP3	EIF2AK3	ERCC2	PTN	BMPR2	PKDCC	WLS	TGFB1	SLC20A2	PPARA	COL6A1	COL1A2	DDR2	ANO6	TXLNG Formation of hard tissues that consist mainly of inorganic compounds	and also contain a small amounts of organic matrices that are believed to play important roles in their formation. [PMID:15132736] http://amigo.geneontology.org/amigo/term/GO:0031214 2025.1.Hs down
GOBP_TISSUE_REMODELING GO:0048771 M19176 59 -0.43850287306318586 -1.5437026453375993 0.010541546564614288 0.5305310589508409 TIMP1	HIF1A	CST3	EXT1	RBPJ	SEMA3C	BCR	SUCO	LTBP3	PTN	LEPR	NFKB1	LRRK1	BMPR2	GPR137B	TGFB1	PRKCA	BGN	RUNX1	RAB7A	C6orf89	COL6A1	EPAS1	DDR2	NF1 The reorganization or renovation of existing tissues. This process can either change the characteristics of a tissue such as in blood vessel remodeling	or result in the dynamic equilibrium of a tissue such as in bone remodeling. [GOC:ebc] http://amigo.geneontology.org/amigo/term/GO:0048771 2025.1.Hs down
GOBP_REGULATION_OF_PROTEIN_UBIQUITINATION GO:0031396 M45109 90 -0.3878178077835123 -1.4914803701505128 0.011066739096368022 0.5305310589508409 TCF25	FBXW7	PER2	RPL5	HSP90AA1	RPL11	CAMLG	CHP1	RPS2	PPIA	CHFR	HUWE1	FBXO33	MTA1	NXN	RPS3	WNK1	HSP90AB1 Any process that modulates the frequency	rate or extent of the addition of ubiquitin groups to a protein. [GOC:mah] http://amigo.geneontology.org/amigo/term/GO:0031396 2025.1.Hs down
GOBP_RIBOSOME_BIOGENESIS GO:0042254 M10214 125 -0.3661850584456617 -1.477570217275083 0.009213865077765107 0.5305310589508409 RPS6	RPS5	RPL5	RPL11	RPS11	RPS21	NOL10	RPLP0	RPL7A	RPS27	RPS19	RPL35A	RPL27	DDX17	RPS27L	DDX31	RPS16	EIF4A3	NOM1	RPS14	RPS12	ERCC2	BRIX1 A cellular process that results in the biosynthesis of constituent macromolecules	assembly	and arrangement of constituent parts of ribosome subunits; includes transport to the sites of protein synthesis. [GOC:ma	PMID:26404467	Wikipedia:Ribosome_biogenesis] http://amigo.geneontology.org/amigo/term/GO:0042254 2025.1.Hs down
GOBP_REGULATION_OF_MONOATOMIC_ION_TRANSPORT GO:0043269 M15848 115 0.3669894579010279 1.4643319366179193 0.011665378820969756 0.5305310589508409 ACTN4	DLG1	ASPH	CEMIP	B2M	MLLT6	UBQLN1	ATP8B1	FLNA	TMX1	P2RX1	LPAR3	FKBP1A	MMP9	PPP3CA	UCP2	PDE4D	PDE4B	ABL1	VMP1	JPH1	AHNAK	HTT	GRIN2D	BAX	CNKSR3	HOMER2	SERPINE2	GABRE	TRPC1	SLMAP	TMSB4X	CHD7	STIM1	WWP2 Any process that modulates the frequency	rate or extent of the directed movement of charged atoms or small charged molecules into	out of or within a cell	or between cells	by means of some agent such as a transporter or pore. [GOC:jl] http://amigo.geneontology.org/amigo/term/GO:0043269 2025.1.Hs up
GOBP_REGULATION_OF_PROTEIN_LOCALIZATION_TO_NUCLEUS GO:1900180 M15292 77 -0.3952928658585747 -1.4600977810209301 0.00996786605924581 0.5305310589508409 RBM22	HSP90AA1	PPP3CB	CHP1	WWTR1	UBR5	JAK1	EI24	SUMO3	YAP1	TFRC	APP	TERT	EIF2AK3	YWHAZ	SUFU	TGFB1	KAT7	JUP	TYK2	NF2	CCT6A	EP300	MARK3	PSEN1	EPM2A	PIK3R1	NF1 Any process that modulates the frequency	rate or extent of protein localization to nucleus. [GOC:TermGenie] http://amigo.geneontology.org/amigo/term/GO:1900180 2025.1.Hs down
GOBP_REGULATION_OF_HORMONE_SECRETION GO:0046883 M16778 69 -0.3998628625193874 -1.458786870481898 0.010087154385690137 0.5305310589508409 RPH3AL	CREB1	PER2	STX1A	HIF1A	PPP3CB	PTPN11	RAB11FIP3	ITPR1	CPT1A	PRKCA Any process that modulates the frequency	rate or extent of the regulated release of a hormone from a cell. [GOC:ai] http://amigo.geneontology.org/amigo/term/GO:0046883 2025.1.Hs down
GOBP_REGULATION_OF_POST_TRANSLATIONAL_PROTEIN_MODIFICATION GO:1901873 M43006 110 -0.366735736399782 -1.4555261021851127 0.011424752818571112 0.5305310589508409 TCF25	FBXW7	PER2	RPL5	HSP90AA1	HIF1A	RPL11	CAMLG	CHP1	RPS2	PPIA	CHFR	UBA2	HUWE1	FBXO33	MTA1	NXN	RPS3	WNK1	HSP90AB1	VCP	TGFBR1	CDC14B	DCUN1D4	GABARAP	EPAS1	EPM2A	ITCH	UBE2S	TANK	HDAC3	PINK1 Any process that modulates the frequency	rate or extent of post-translational protein modification. [GOC:TermGenie	GOC:yaf	PMID:21209915] http://amigo.geneontology.org/amigo/term/GO:1901873 2025.1.Hs down
GOBP_REGULATION_OF_CELL_MORPHOGENESIS GO:0022604 M10484 110 0.3663606485037499 1.452396941597531 0.011773880580355988 0.5305310589508409 PTK2	DLG1	FERMT2	MYH9	CORO1C	GAS2	CCL24	ANKRD27	PLXND1	STAU2	BVES	MYO9A	ITGB2	ZRANB1	PRKDC	LRP8	RREB1	FMNL2	WTIP	DNMBP	CAMSAP1 Any process that modulates the frequency	rate or extent of cell morphogenesis. Cell morphogenesis is the developmental process in which the shape of a cell is generated and organized. [GOC:isa_complete] http://amigo.geneontology.org/amigo/term/GO:0022604 2025.1.Hs up
GOBP_RETINOIC_ACID_RECEPTOR_SIGNALING_PATHWAY GO:0048384 M16403 19 0.6087663955632283 1.690718474579608 0.018738483046677325 0.5563624987892816 ACTN4	ASXL1	CNOT1	SP100	CALR	GREB1L	ZNF536	ALDH1A2	EZH2	RXRA A nuclear receptor-mediated signaling pathway initiated by a retinoic acid binding to an intracellular receptor of the nuclear receptor protein family	and ending with regulation of a downstream cellular process	e.g. transcription. [GOC:dgh] http://amigo.geneontology.org/amigo/term/GO:0048384 2025.1.Hs up
GOBP_ATTACHMENT_OF_SPINDLE_MICROTUBULES_TO_KINETOCHORE GO:0008608 M10211 21 0.5799437634576976 1.6528291306921394 0.020467988516115164 0.5563624987892816 KNTC1	SKA3	ZNF207	MAD1L1	CCNB1	SPC24	RACGAP1	ZWILCH	SPAG5	KIF2C The process in which spindle microtubules become physically associated with the proteins making up the kinetochore complex. [GOC:vw	PMID:10322137] http://amigo.geneontology.org/amigo/term/GO:0008608 2025.1.Hs up
GOBP_GLIAL_CELL_PROLIFERATION GO:0014009 M22725 21 -0.5877970266063548 -1.6412281122334322 0.01589971155096722 0.5563624987892816 DICER1	CREB1	RNF10	LEPR	EEF2	ETV5	VEGFC	NF2	EPM2A	NF1	NFIA The multiplication or reproduction of glial cells by cell division	resulting in the expansion of their population. Glial cells exist throughout the nervous system	and include Schwann cells	astrocytes	and oligodendrocytes among others. [GOC:ef	ISBN:0878932585] http://amigo.geneontology.org/amigo/term/GO:0014009 2025.1.Hs down
GOBP_ENDOCHONDRAL_BONE_MORPHOGENESIS GO:0060350 M15575 19 -0.5924089738341196 -1.6312866791847984 0.0203740219135742 0.5563624987892816 CSGALNACT1	EXT1	AXIN2	RUNX2	POR	BMPR2	INPPL1 The process in which bones are generated and organized as a result of the conversion of initial cartilaginous anlage into bone. [GOC:dph	PMID:11680679] http://amigo.geneontology.org/amigo/term/GO:0060350 2025.1.Hs down
GOBP_REGULATION_OF_BIOMINERAL_TISSUE_DEVELOPMENT GO:0070167 M45907 28 -0.5388254977354336 -1.6193424938902372 0.014668262653521582 0.5563624987892816 ATP2B1	HIF1A	SRGN	LTBP3	PTN	BMPR2	PKDCC	TGFB1	SLC20A2	DDR2	ANO6	TXLNG	NBR1	MEF2C	ANKH	ACVR2B Any process that modulates the frequency	rate or extent of biomineral tissue development	the formation of hard tissues that consist mainly of inorganic compounds. [GOC:mah] http://amigo.geneontology.org/amigo/term/GO:0070167 2025.1.Hs down
GOBP_ESTABLISHMENT_OR_MAINTENANCE_OF_BIPOLAR_CELL_POLARITY GO:0061245 M15632 23 0.5557674701156097 1.6094567777416173 0.018512873659842177 0.5563624987892816 DLG1	MTCL1	SCRIB	MYO9A	PARD3	PRKCZ	PRKCI Any cellular process that results in the specification	formation or maintenance of a bipolar intracellular organization or cell growth patterns. [GOC:dph	GOC:vw] http://amigo.geneontology.org/amigo/term/GO:0061245 2025.1.Hs up
GOBP_INNER_EAR_RECEPTOR_CELL_DEVELOPMENT GO:0060119 M16719 18 0.5885249887098956 1.6066855204068744 0.020496266045055646 0.5563624987892816 SCRIB	GABRB3	ATP8B1	SLC4A7	SDC4	FGFR1 The process whose specific outcome is the progression of an inner ear receptor cell over time	from its formation to the mature structure. Cell development does not include the steps involved in committing a cell to a specific fate. [GOC:dph] http://amigo.geneontology.org/amigo/term/GO:0060119 2025.1.Hs up
GOBP_REGULATION_OF_BONE_MINERALIZATION GO:0030500 M22971 26 -0.5374727111083716 -1.6026919922537721 0.015251373798403507 0.5563624987892816 ATP2B1	HIF1A	SRGN	LTBP3	PTN	BMPR2	PKDCC	SLC20A2	DDR2	ANO6	TXLNG	NBR1	MEF2C	ANKH	ACVR2B Any process that modulates the frequency	rate or extent of bone mineralization. [GOC:go_curators] http://amigo.geneontology.org/amigo/term/GO:0030500 2025.1.Hs down
GOBP_REGULATION_OF_TRANSPORTER_ACTIVITY GO:0032409 M12446 28 0.5349642153418794 1.6024382961174635 0.018701012619799923 0.5563624987892816 ACTN4	ASPH	UBQLN1	MMP9	VMP1	CNIH3	CNIH2	AHNAK	HTT	TMSB4X	STIM1	WWP2 Any process that modulates the activity of a transporter. [GOC:mah] http://amigo.geneontology.org/amigo/term/GO:0032409 2025.1.Hs up
GOBP_SENSORY_PERCEPTION_OF_LIGHT_STIMULUS GO:0050953 M13006 37 -0.49739466588974773 -1.5964005448923457 0.01845069379315094 0.5563624987892816 EFEMP1	PPT1	PITPNA	CEP250	TULP2	DHRS3	SPATA7	EYA3	BBS2	ATF6	RABGGTA The series of events required for an organism to receive a sensory light stimulus	convert it to a molecular signal	and recognize and characterize the signal. This is a neurological process. [GOC:ai] http://amigo.geneontology.org/amigo/term/GO:0050953 2025.1.Hs down
GOBP_REGULATION_OF_PROTEIN_IMPORT_INTO_NUCLEUS GO:0042306 M45144 30 -0.5221870696795352 -1.5895746246696032 0.01926090389983621 0.5563624987892816 RBM22	HSP90AA1	CHP1	UBR5	EI24	SUFU	TGFB1	JUP	EP300	PSEN1	EPM2A	PIK3R1	NF1	HDAC3 Any process that modulates the frequency	rate or extent of movement of proteins from the cytoplasm to the nucleus. [GOC:jl] http://amigo.geneontology.org/amigo/term/GO:0042306 2025.1.Hs down
GOBP_POSITIVE_REGULATION_OF_TUMOR_NECROSIS_FACTOR_SUPERFAMILY_CYTOKINE_PRODUCTION GO:1903557 M11905 26 -0.5273669108525377 -1.5725574667037385 0.020189782846964086 0.5563624987892816 HSPB1	THBS1	PTPN11	MAPKAPK2	APP	TGFB1	TLR1	STAT3	PSEN1	PIK3R1	LILRA5	PLCG2	LRRK2	EPHB2	RIPK1	SYK Any process that activates or increases the frequency	rate or extent of tumor necrosis factor superfamily cytokine production. [GO_REF:0000058	GOC:TermGenie	PMID:24187568] http://amigo.geneontology.org/amigo/term/GO:1903557 2025.1.Hs down
GOBP_POSITIVE_REGULATION_OF_MONOATOMIC_ION_TRANSMEMBRANE_TRANSPORT GO:0034767 M42763 31 0.507041457348362 1.5691874005760862 0.014931322731094347 0.5563624987892816 ACTN4	ASPH	CEMIP	FLNA	P2RX1	PPP3CA	ABL1	VMP1	HTT	BAX	TRPC1	TMSB4X	STIM1 Any process that activates or increases the frequency	rate or extent of the directed movement of ions from one side of a membrane to the other. [GOC:mah] http://amigo.geneontology.org/amigo/term/GO:0034767 2025.1.Hs up
GOBP_NEGATIVE_REGULATION_OF_PROTEIN_UBIQUITINATION GO:0031397 M46761 31 -0.511534065182237 -1.5680748354884546 0.017343708563475762 0.5563624987892816 PER2	RPL5	RPL11	CAMLG	CHP1	PPIA	NXN	RPS3	WNK1 Any process that stops	prevents	or reduces the frequency	rate or extent of the addition of ubiquitin groups to a protein. [GOC:mah] http://amigo.geneontology.org/amigo/term/GO:0031397 2025.1.Hs down
GOBP_POSITIVE_REGULATION_OF_MONOATOMIC_ION_TRANSPORT GO:0043270 M12749 47 0.4615551294749263 1.5661329946665075 0.012732488570226753 0.5563624987892816 ACTN4	DLG1	ASPH	CEMIP	MLLT6	FLNA	P2RX1	LPAR3	PPP3CA	ABL1	VMP1	HTT	BAX	CNKSR3	TRPC1	TMSB4X	STIM1 Any process that activates or increases the frequency	rate or extent of the directed movement of charged atoms or small charged molecules into	out of or within a cell	or between cells	by means of some agent such as a transporter or pore. [GOC:jl] http://amigo.geneontology.org/amigo/term/GO:0043270 2025.1.Hs up
GOBP_ACTIN_FILAMENT_BASED_MOVEMENT GO:0030048 M17820 47 0.461019481648136 1.564315452879003 0.013335203047638359 0.5563624987892816 ACTN4	DLG1	MYH9	FLNA	MYO9B	WIPF1	PDE4D	PDE4B Movement of organelles or other particles along actin filaments	or sliding of actin filaments past each other	mediated by motor proteins. [GOC:BHF	GOC:mah] http://amigo.geneontology.org/amigo/term/GO:0030048 2025.1.Hs up
GOBP_REGULATION_OF_OSSIFICATION GO:0030278 M16923 45 -0.4643938763704448 -1.5460176826852157 0.0140403233464827 0.5563624987892816 ATP2B1	HIF1A	RBPJ	PTPN11	SRGN	DHRS3	RUNX2	LTBP3	PTN	ZBTB16	BMPR2	PKDCC	TGFB1	SLC20A2	DDR2	ANO6	TXLNG Any process that modulates the frequency	rate or extent of ossification	the formation of bone or of a bony substance or the conversion of fibrous tissue or of cartilage into bone or a bony substance. [GOC:go_curators] http://amigo.geneontology.org/amigo/term/GO:0030278 2025.1.Hs down
GOBP_REGULATION_OF_RHO_PROTEIN_SIGNAL_TRANSDUCTION GO:0035023 M13862 41 0.4650287486345607 1.5264700951090022 0.020262572002700482 0.5563624987892816 FERMT2	ARHGEF28	FXR1	MYO9B	ABL2	MET	DOCK7	ABL1	ARHGEF2	ROBO1	LPAR1	PKP4 Any process that modulates the frequency	rate or extent of Rho protein signal transduction. [GOC:bf] http://amigo.geneontology.org/amigo/term/GO:0035023 2025.1.Hs up
GOBP_ESTABLISHMENT_OF_CELL_POLARITY GO:0030010 M12181 70 0.41272074922460833 1.5106720467788326 0.018939763212208725 0.5563624987892816 PTK2	MYH9	SCRIB	CLASP1	SKA3	MYO9A	ABL2	PARD3	FBXW11	DOCK7	PRKCZ	ABL1	GSK3B	RICTOR	PRKCI	HTT	FLOT2	GPSM1	SIPA1L3	DIAPH3	WDPCP	CCDC66	FAT1	PHLDB2	EZR	EPHB1	NDE1	GJA1	PARD3B	SPAG5	CYTH1 The specification and formation of anisotropic intracellular organization or cell growth patterns. [GOC:mah] http://amigo.geneontology.org/amigo/term/GO:0030010 2025.1.Hs up
GOBP_REGULATION_OF_INSULIN_SECRETION GO:0050796 M42845 44 -0.4511835965528102 -1.508859148050421 0.01999708498546091 0.5563624987892816 RPH3AL	PER2	STX1A	HIF1A	PPP3CB	PTPN11	ITPR1	CPT1A	PRKCA Any process that modulates the frequency	rate or extent of the regulated release of insulin. [GOC:ai] http://amigo.geneontology.org/amigo/term/GO:0050796 2025.1.Hs down
GOBP_MESODERM_DEVELOPMENT GO:0007498 M15421 42 -0.454761936332907 -1.4989870890419192 0.01999708498546091 0.5563624987892816 NCKAP1	NOMO1	ITGB4	EXT1	GPI	NOMO3	YAP1	SMAD1	BMPR2	WLS	SSBP3	NF2 The process whose specific outcome is the progression of the mesoderm over time	from its formation to the mature structure. The mesoderm is the middle germ layer that develops into muscle	bone	cartilage	blood and connective tissue. [GOC:dph	GOC:tb] http://amigo.geneontology.org/amigo/term/GO:0007498 2025.1.Hs down
GOBP_PROTEIN_LOCALIZATION_TO_MITOCHONDRION GO:0070585 M15269 52 -0.4297331383429317 -1.4698332905421807 0.019469516347017487 0.5563624987892816 FBXW7	ABLIM3	HSP90AA1	HK1	PITRM1	BNIP3L	HUWE1	EIF2AK1	HSPA4	VPS11	HPS4	NPEPPS	UBE2J2	MFN2	TOMM20	UBL5	PINK1	TOMM6	AP3B1	DNAJA1 A process in which a protein is transported to	or maintained in	a location within the mitochondrion. [GOC:ecd] http://amigo.geneontology.org/amigo/term/GO:0070585 2025.1.Hs down
GOBP_REGULATION_OF_MONOATOMIC_ION_TRANSMEMBRANE_TRANSPORT GO:0034765 M42761 84 0.3820901739170273 1.456639308256458 0.014232651727844983 0.5563624987892816 ACTN4	DLG1	ASPH	CEMIP	UBQLN1	FLNA	P2RX1	FKBP1A	MMP9	PPP3CA	UCP2	PDE4D	PDE4B	ABL1	VMP1	JPH1	AHNAK	HTT	GRIN2D	BAX	TRPC1	SLMAP	TMSB4X	CHD7	STIM1	WWP2 Any process that modulates the frequency	rate or extent of the directed movement of ions from one side of a membrane to the other. [GOC:mah] http://amigo.geneontology.org/amigo/term/GO:0034765 2025.1.Hs up
GOBP_ESTABLISHMENT_OR_MAINTENANCE_OF_CELL_POLARITY GO:0007163 M1049 97 0.37526665278513793 1.4551608882068363 0.019874702767173753 0.5563624987892816 PTK2	DLG1	MYH9	MTCL1	ACTR2	SCRIB	CLASP1	SKA3	MYO9A	DST	ABL2	PARD3	FBXW11	DOCK7	PRKCZ	ABL1	GSK3B	RICTOR	RHOG	PRKCI	HTT	FLOT2	GPSM1	SIPA1L3	DIAPH3	CTNNA1	WDPCP Any cellular process that results in the specification	formation or maintenance of anisotropic intracellular organization or cell growth patterns. [GOC:mah] http://amigo.geneontology.org/amigo/term/GO:0007163 2025.1.Hs up
GOBP_PYRIDINE_CONTAINING_COMPOUND_METABOLIC_PROCESS GO:0072524 M24591 75 -0.39117996873118077 -1.4470862603426082 0.01544254934741515 0.5563624987892816 GAPDH	DDIT4	HIF1A	TPI1	HK1	PSAT1	TALDO1	GPI	ME2	APP	ENO1	ALDOA	MDH2	LDHB	PNPO	GOT2	VCP	SLC25A13	ME1	PGLS	NNMT	PPARA	COL6A1	STAT3	EP300	PSEN1	MDH1	TP53I3	PC	NCOR1	ADPGK	LIPA	TKT	MFSD8	PFKL	ACO1	ACACB	G6PD The chemical reactions and pathways involving a pyridine-containing compound	i.e. any compound that contains pyridine or a formal derivative thereof. [GOC:mah] http://amigo.geneontology.org/amigo/term/GO:0072524 2025.1.Hs down
GOBP_REGULATION_OF_MACROAUTOPHAGY GO:0016241 M22819 81 -0.3843589426282 -1.4296121383694524 0.015107555604740086 0.5563624987892816 UVRAG	GAPDH	FBXW7	SNX5	HIF1A	VDAC1	EXOC7	BNIP3L	HUWE1	EIF2AK1	CAPNS1	WIPI1	ATP6V1E1	AMBRA1	ATP6V0B	VPS13D	PIP4K2A	VPS35	EPM2A	VPS13C	TECPR1	PINK1 Any process that modulates the frequency	rate or extent of macroautophagy. [GOC:krc] http://amigo.geneontology.org/amigo/term/GO:0016241 2025.1.Hs down
GOBP_PEPTIDE_TRANSPORT GO:0015833 M42679 69 -0.38680072911535063 -1.4111333610005867 0.018316481927829555 0.5563624987892816 RPH3AL	PER2	SLC13A3	STX1A	HIF1A	PPP3CB	PTPN11	ABCC4	ABCC1	ITPR1	SNX19	CPT1A	PRKCA The directed movement of peptides	compounds of two or more amino acids where the alpha carboxyl group of one is bound to the alpha amino group of another	into	out of or within a cell	or between cells	by means of some agent such as a transporter or pore. [GOC:ai] http://amigo.geneontology.org/amigo/term/GO:0015833 2025.1.Hs down
GOBP_VASCULAR_PROCESS_IN_CIRCULATORY_SYSTEM GO:0003018 M16767 84 -0.37168354770003303 -1.3951858545350921 0.0182271014430643 0.5563624987892816 ATP2B1	PER2	SLC13A3	ECE1	EXT1	HTR7	PTPN11	ABCC4	BCR	GPX1	TFRC	ABCC1	SLC7A2	LEPR	BBS2	BMPR2	TGFB1	SCARB1	TJP1	ATP2B4	SLC2A3	RHOA	KCNMA1	SLC7A3	ABCC5	ADD3	ATP2A3	ABCC3	GCLC	FLVCR2	SVEP1	CTNNBIP1	SLC38A1	SLC7A8	ITGB1BP1	PRKG1 A circulatory process that occurs at the level of the vasculature. [GOC:mtg_cardio] http://amigo.geneontology.org/amigo/term/GO:0003018 2025.1.Hs down
GOBP_MESENCHYME_DEVELOPMENT GO:0060485 M14932 108 -0.34566277653080296 -1.368819502292542 0.019825833358991414 0.5563624987892816 FN1	SEMA4G	NCKAP1	HIF1A	NOMO1	EXT1	PKD2	WWTR1	RBPJ	ROBO2	TGFB1I1	DDX17	SEMA3C	AXIN2	NOMO3	YAP1	TRIM62	OVOL2 The process whose specific outcome is the progression of a mesenchymal tissue over time	from its formation to the mature structure. A mesenchymal tissue is made up of loosely packed stellate cells. [GOC:dph] http://amigo.geneontology.org/amigo/term/GO:0060485 2025.1.Hs down
GOBP_AXON_DEVELOPMENT GO:0061564 M24295 192 -0.31106788403665686 -1.3363445484211092 0.015541867456500238 0.5563624987892816 FN1	SEMA4G	VASH2	CREB1	TNFRSF21	ACTB	SIPA1L1	ECE1	PITPNA	PPP3CB	EXT1	PUM2	PTPN11	ROBO2	DDR1	CNP	SEMA3C	NOTCH3	NPTN	KIF5B	STXBP1	APP	APLP2	VCL	PAK2	SLIT3	PTN	UST	MAP2K2	BMPR2	ENAH	CYFIP1	PALLD	PRKCA	NTN4	MARK2	UNC5D	BRAF	TIAM2	ULK2	LIMK1	PTPRS	GRN	NDEL1	BAIAP2	ZFYVE27	ACTG1	SPG21	PSEN1 The progression of an axon over time. Covers axonogenesis (de novo generation of an axon) and axon regeneration (regrowth)	as well as processes pertaining to the progression of the axon over time (fasciculation and defasciculation). [GOC:dph
GOBP_GAMETE_GENERATION GO:0007276 M45815 240 0.3010567867565064 1.327871061380275 0.013594603023129502 0.5563624987892816 CDYL	RAD23B	DAZAP1	GAS2	POC1B	ZFP57	RHBDD1	STAU2	EIF2S2	NRIP1	TBP	FXR1	CFAP44	ZNF148	SKA3	SSH2	CCNYL1	CALR	FOXJ3	RAN	TCFL5	FBXW11	CCNY	USP9Y	PPP2R1A	CREM	ABHD2	FANCA	ORC4	KATNAL1	SMARCA2	NDRG3	AXL	AFF4	HERC4	SUN1	SPIRE1	SBF1	FANCL	ACVR2A	CELF1	ZFY	BAX	TRIM28	VPS13B	TTLL5	NUP210L	ZMIZ1	DMC1	AURKA
GOBP_RESPONSE_TO_PEPTIDE GO:1901652 M10640 288 -0.29325096299388714 -1.317453310904311 0.013787087565745988 0.5563624987892816 TIMP1	DICER1	MX1	RPL13A	GAPDH	CREB1	TNFRSF21	CD44	VIM	HIF1A	PRDM5	THBS1	PPP3CB	EXT1	IRAK3	PTPN11	JAK1	MAPKAPK2	IFNGR2	RPS16	COMMD7	KIF5B	YY1	YAP1	TFRC	P4HB	STXBP1	ADAM9	APP	CPNE1	IL27RA	ACTR3	GSTP1	STAT5B	SLIT3	RPS3	WNK1	LEPR	BBS2	NFKB1	HSP90AB1	NFYB	VEGFC	CBL	CRKL	PRKCA	FLNB	HIPK1	ABCD4	TYK2
GOBP_MULTICELLULAR_ORGANISMAL_REPRODUCTIVE_PROCESS GO:0048609 M48471 269 0.29649762548195324 1.3090362709524257 0.017959247280759868 0.5563624987892816 CDYL	RAD23B	DAZAP1	GAS2	POC1B	ZFP57	RHBDD1	STAU2	EIF2S2	NRIP1	TBP	FXR1	GABRB3	CFAP44	ZNF148	SKA3	ASH1L	P2RX1	SSH2	CCNYL1	CALR	FOXJ3	RAN	TCFL5	FBXW11	CCNY	USP9Y	SLIT2	PPP2R1A	CREM	ABHD2	FANCA	ORC4	KATNAL1	SMARCA2	NDRG3	AXL	AFF4	HERC4	SUN1	SPIRE1	SBF1	FANCL	ACVR2A	CELF1	TPST2	ZFY	BAX	TRIM28	VPS13B
GOBP_LUNG_EPITHELIUM_DEVELOPMENT GO:0060428 M10346 17 -0.6181461064522392 -1.6617713613023928 0.020837150633640292 0.5588821473522807 CREB1	RBPJ	YAP1	MAP2K2	COL6A1 The biological process whose specific outcome is the progression of the lung epithelium from an initial condition to its mature state. This process begins with the formation of lung epithelium and ends with the mature structure. The lung epithelium is the specialized epithelium that lines the inside of the lung. [GOC:dph	GOC:mtg_lung] http://amigo.geneontology.org/amigo/term/GO:0060428 2025.1.Hs down
GOBP_NEGATIVE_REGULATION_OF_HYDROLASE_ACTIVITY GO:0051346 M10900 15 -0.6186039007599307 -1.6063950709052417 0.02122410429238204 0.5593592231870191 TIMP1	GAPDH	CHP1 Any process that stops or reduces the rate of hydrolase activity	the catalysis of the hydrolysis of various bonds. [GOC:ai] http://amigo.geneontology.org/amigo/term/GO:0051346 2025.1.Hs down
GOBP_REGULATION_OF_TUMOR_NECROSIS_FACTOR_MEDIATED_SIGNALING_PATHWAY GO:0010803 M14642 24 -0.5456884381604541 -1.5995853747224549 0.021351483885523145 0.5593592231870191 DICER1	EXT1	MAPKAPK2	CPNE1	GSTP1	HIPK1	IKBKB	TANK Any process that modulates the rate or extent of the tumor necrosis factor-mediated signaling pathway. The tumor necrosis factor-mediated signaling pathway is the series of molecular signals generated as a consequence of tumor necrosis factor binding to a cell surface receptor. [GOC:dph	GOC:tb] http://amigo.geneontology.org/amigo/term/GO:0010803 2025.1.Hs down
GOBP_NEGATIVE_REGULATION_OF_UBIQUITIN_DEPENDENT_PROTEIN_CATABOLIC_PROCESS GO:2000059 M25433 25 -0.5420571218794741 -1.5917746342866927 0.02334828222671759 0.560281585425278 RPL5	RPL11	CAMLG	USP7	HIPK2	SUFU	HSP90AB1	EIF3H Any process that stops	prevents	or reduces the frequency	rate or extent of ubiquitin-dependent protein catabolic process. [GOC:BHF] http://amigo.geneontology.org/amigo/term/GO:2000059 2025.1.Hs down
GOBP_REGULATION_OF_ESTABLISHMENT_OF_PROTEIN_LOCALIZATION_TO_MITOCHONDRION GO:1903747 M13792 22 -0.5658597989048102 -1.5866793475052772 0.022533112903784916 0.560281585425278 FBXW7	ABLIM3	BNIP3L	HUWE1	VPS11	HPS4	NPEPPS	UBE2J2	UBL5	PINK1	DNAJA1 Any process that modulates the frequency	rate or extent of establishment of protein localization to mitochondrion. [GO_REF:0000058	GOC:TermGenie	PMID:16857185] http://amigo.geneontology.org/amigo/term/GO:1903747 2025.1.Hs down
GOBP_TUMOR_NECROSIS_FACTOR_SUPERFAMILY_CYTOKINE_PRODUCTION GO:0071706 M24512 41 -0.4686160598872093 -1.5419171861424452 0.02386106144019199 0.560281585425278 DICER1	HSPB1	THBS1	IRAK3	PTPN11	MAPKAPK2	APP	IL27RA	GSTP1	TGFB1	TLR1	ELF4	STAT3	PSEN1	PIK3R1	LILRA5	HDAC3 The appearance of any member of the TNF superfamily due to biosynthesis or secretion following a cellular stimulus	resulting in an increase in its intracellular or extracellular levels. [GOC:add] http://amigo.geneontology.org/amigo/term/GO:0071706 2025.1.Hs down
GOBP_NEGATIVE_REGULATION_OF_POST_TRANSLATIONAL_PROTEIN_MODIFICATION GO:1901874 M46900 36 -0.476215552251999 -1.525061130773129 0.023160378640579356 0.560281585425278 PER2	RPL5	RPL11	CAMLG	CHP1	PPIA	NXN	RPS3	WNK1 Any process that stops	prevents or reduces the frequency	rate or extent of post-translational protein modification. [GOC:TermGenie	GOC:yaf	PMID:21209915] http://amigo.geneontology.org/amigo/term/GO:1901874 2025.1.Hs down
GOBP_RESPONSE_TO_TYPE_II_INTERFERON GO:0034341 M15265 39 -0.463704146519783 -1.5158255724592373 0.02387351628975885 0.560281585425278 RPL13A	GAPDH	VIM	JAK1	IFNGR2	KIF5B	STXBP1	ACTR3	FLNB	TYK2 Any process that results in a change in state or activity of a cell or an organism (in terms of movement	secretion	enzyme production	gene expression	etc.) as a result of an interferon-gamma stimulus. Interferon-gamma is also known as type II interferon. [GOC:add	ISBN:0126896631	PMID:15546383] http://amigo.geneontology.org/amigo/term/GO:0034341 2025.1.Hs down
GOBP_VIRAL_LIFE_CYCLE GO:0019058 M13783 110 -0.34826038742921095 -1.3821998620492713 0.022398853887314104 0.560281585425278 EEF1A1	MX1	UVRAG	PABPC1	PCBP2	VAPB	PPIA	CHMP4A	CHMP5	TFRC	ITGB5	P4HB	TRIM62	NUP153	ITGA5	HSP90AB1	EPS15	VCP	CBL	VAPA	RAB7A	KIAA0319L	SLC20A2	MVB12B	SCARB1	ICAM1	ARL8B	ADAR	PDCD6IP	ITCH	CHMP3	NFIA A set of processes which all viruses follow to ensure survival; includes attachment and entry of the virus particle	decoding of genome information	translation of viral mRNA by host ribosomes	genome replication	and assembly and release of viral particles containing the genome. [ISBN:1555811272] http://amigo.geneontology.org/amigo/term/GO:0019058 2025.1.Hs down
GOBP_REGULATION_OF_SYNAPSE_STRUCTURE_OR_ACTIVITY GO:0050803 M14201 112 -0.3457555053646268 -1.373204891885683 0.023244082715264267 0.560281585425278 SIPA1L1	PPT1	CAPRIN1	PUM2	ROBO2	NEDD8	KIF5B	PRNP	APP	YWHAZ	FARP1	DOCK1	ETV5	VCP	CYFIP1	PRKCA	TANC2	PDLIM5	NEDD4L	PTPRS	BAIAP2	RHOA	SRGAP2	DLGAP4	VPS35	PSEN1	AGAP1	NF1	DLG5	ABI2	RTN4	RAC1	PTPN13	ELMO1	SYNDIG1	ARF4	PPFIA2	EEF2K	THBS2	ZMYND8	UBE3B	MEF2C	LRRK2	SPARC	ABHD17B Any process that modulates the physical form or the activity of a synapse	the junction between a neuron and a target (neuron	muscle	or secretory cell). [GOC:ai] http://amigo.geneontology.org/amigo/term/GO:0050803 2025.1.Hs down
GOBP_RESPONSE_TO_VIRUS GO:0009615 M16779 130 -0.32556893110991003 -1.3198687357776149 0.02300539925370172 0.560281585425278 MX1	TPT1	PCBP2	DDIT4	HSP90AA1	HIF1A	HSPB1	VAPB	EXT1	SEC11A	IRAK3	PHB2	JAK1	DDX17	BNIP3L	ZMYND11	IFNGR2	SERINC3	ENO1 Any process that results in a change in state or activity of a cell or an organism (in terms of movement	secretion	enzyme production	gene expression	etc.) as a result of a stimulus from a virus. [GOC:hb] http://amigo.geneontology.org/amigo/term/GO:0009615 2025.1.Hs down
GOBP_NERVOUS_SYSTEM_PROCESS GO:0050877 M9711 280 -0.28844663165892614 -1.2903161490349173 0.023430733255060822 0.560281585425278 DICER1	CREB1	RPS6KA2	TNFRSF21	CCDC50	NAV2	EFEMP1	STX1A	HSP90AA1	HIF1A	CCND2	PPT1	PITPNA	PPP3CB	SSH1	VDAC1	CEP250	TULP2	EI24	BCR	GPI	CHMP4A	PRNP	EIF4A3	DHRS3	RNF10	GPX1	SPATA7	LGMN	EYA3	APP	VDAC3	GNB1	EIF2AK3	RCSD1	ITPR1	PTN	ITGA5	BBS2	EEF2	HIPK2	DIAPH1	EIF4EBP2	ATF6	RABGGTA	PGAP1	CYFIP1	SHROOM4	PRKCA	BRAF
GOBP_SEXUAL_REPRODUCTION GO:0019953 M45100 317 0.2832543921720939 1.2771926333076982 0.023452817889588005 0.560281585425278 CDYL	RAD23B	MYH9	DAZAP1	GAS2	ACTR2	POC1B	ZFP57	RHBDD1	STAU2	EIF2S2	NRIP1	TBP	UBE3A	FXR1	CFAP44	ZNF148	SKA3	ASH1L	SSH2	CCNYL1	ANAPC1	CALR	FOXJ3	CCT3	RAN	TCFL5	FBXW11	CCNY	USP9Y	TUBGCP3	PPP2R1A	CREM	ABHD2	FANCA	CDC25C	ORC4	KATNAL1	SMARCA2	ANAPC7	NDRG3	AXL	AFF4	HERC4	SUN1	SPIRE1	SBF1	FANCL	ACVR2A	CELF1
GOBP_NEGATIVE_REGULATION_OF_MICROTUBULE_DEPOLYMERIZATION GO:0007026 M49349 16 0.5936734594509994 1.581938673362342 0.02602512101185504 0.5692679382496059 ATXN7	MID1	CLASP1	NAV3	ARHGEF2	DIAPH3	TAOK1	CLASP2	TTBK2	TPX2 Any process that stops	prevents	or reduces the frequency	rate or extent of microtubule depolymerization; prevention of depolymerization of a microtubule can result from binding by 'capping' at the plus end (e.g. by interaction with another cellular protein of structure) or by exposing microtubules to a stabilizing drug such as taxol. [GOC:mah	ISBN:0815316194] http://amigo.geneontology.org/amigo/term/GO:0007026 2025.1.Hs up
GOBP_ACUTE_INFLAMMATORY_RESPONSE GO:0002526 M6557 22 -0.5591125705151324 -1.5677600180891864 0.024985660647414157 0.5692679382496059 FN1	DNASE1	EXT1	TFRC	GSTP1	EIF2AK1 Inflammation which comprises a rapid	short-lived	relatively uniform response to acute injury or antigenic challenge and is characterized by accumulations of fluid	plasma proteins	and granulocytic leukocytes. An acute inflammatory response occurs within a matter of minutes or hours	and either resolves within a few days or becomes a chronic inflammatory response. [GO_REF:0000022	GOC:add	ISBN:0781735149] http://amigo.geneontology.org/amigo/term/GO:0002526 2025.1.Hs down
GOBP_ASSOCIATIVE_LEARNING GO:0008306 M10883 23 -0.536909317522419 -1.5484178896812115 0.025329553721800343 0.5692679382496059 CREB1	HIF1A	PPT1	EIF4A3	LGMN	APP Learning by associating a stimulus (the cause) with a particular outcome (the effect). [ISBN:0582227089] http://amigo.geneontology.org/amigo/term/GO:0008306 2025.1.Hs down
GOBP_TRANSLATIONAL_INITIATION GO:0006413 M11328 66 -0.4003459399988892 -1.438192765707966 0.025174299748005936 0.5692679382496059 RPL13A	EIF3F	RPS5	EIF3E	HSPB1	EIF4B	EIF3L	EIF4A1	EIF3D	METAP2	EIF2AK1	EIF2AK3	CTIF	RPS3	SLBP	EIF4EBP2	EIF2S3	EIF3H	EIF3M	EIF2B3	EIF4G3	EIF1	BZW2 The process preceding formation of the peptide bond between the first two amino acids of a protein. This includes the formation of a complex of the ribosome	mRNA or circRNA	and an initiation complex that contains the first aminoacyl-tRNA. [ISBN:019879276X] http://amigo.geneontology.org/amigo/term/GO:0006413 2025.1.Hs down
GOBP_MITOTIC_CYTOKINESIS GO:0000281 M10078 50 -0.41855083981723157 -1.4202031642256372 0.02581979461333942 0.5692679382496059 ESPL1	EXOC7	RAB11FIP3	CHMP4A	CHMP5	KIF20B	WNK1	MTMR3	SNX9	STAMBP	RHOA	PDCD6IP	MYH14	CHMP3	CNTROB	TTC19 A cell cycle process that results in the division of the cytoplasm of a cell after mitosis	resulting in the separation of the original cell into two daughter cells. [GOC:mtg_cell_cycle] http://amigo.geneontology.org/amigo/term/GO:0000281 2025.1.Hs down
GOBP_RRNA_PROCESSING GO:0006364 M5199 86 -0.3706217713829992 -1.405561104076671 0.025987433524437265 0.5692679382496059 RPS6	RPL5	RPL11	RPS21	NOL10	RPL7A	RPS27	RPS19	RPL35A	RPL27	DDX17	RPS16	EIF4A3	RPS14	ERCC2	BRIX1 Any process involved in the conversion of a primary ribosomal RNA (rRNA) transcript into one or more mature rRNA molecules. [GOC:curators] http://amigo.geneontology.org/amigo/term/GO:0006364 2025.1.Hs down
GOBP_POSITIVE_REGULATION_OF_IMMUNE_SYSTEM_PROCESS GO:0002684 M4046 343 -0.26980828070782176 -1.2308369348226997 0.025082974284445697 0.5692679382496059 RPL13A	CREB1	TNFRSF21	GALNT2	ARID1B	ACTB	MLH1	PCBP2	HSP90AA1	PPT1	HK1	THBS1	THEMIS2	PUM2	IRAK3	SLAMF6	CD99L2	PTPN11	RPS19	PHB2	MAPKAPK2	GPI	PRNP	TFRC	NPLOC4	P4HB	LGMN	STXBP1	YWHAE	TRIM62	APP	IL27RA	PAK2	CD276	STAT5B	HMCES	LPXN	PTN	RPS3	WNK1	NFKB1	CPT1A	ZBTB16	VEGFC	TP53BP1	CRKL	PUM1	TGFB1	PRKCA	TLR1
GOBP_POSITIVE_REGULATION_OF_CELL_MATRIX_ADHESION GO:0001954 M12172 22 0.5466419125530922 1.585531849504685 0.030128019511182973 0.5752634384697437 PLEKHA2	FERMT2	SDC4	ABL1	GSK3B Any process that activates or increases the rate or extent of cell adhesion to an extracellular matrix. [GOC:hjd] http://amigo.geneontology.org/amigo/term/GO:0001954 2025.1.Hs up
GOBP_POSTSYNAPTIC_MEMBRANE_ORGANIZATION GO:0001941 M13157 15 -0.6029465161263741 -1.5657358615667383 0.030129199174180984 0.5752634384697437 FNTA	SSH1	FARP1	ETV5	CRKL	GPHN A process which results in the assembly	arrangement of constituent parts	or disassembly of a postsynaptic membrane	the specialized area of membrane facing the presynaptic membrane on the tip of the nerve ending and separated from it by a minute cleft (the synaptic cleft). [GOC:dph	GOC:pr] http://amigo.geneontology.org/amigo/term/GO:0001941 2025.1.Hs down
GOBP_CELLULAR_RESPONSE_TO_TYPE_II_INTERFERON GO:0071346 M42916 32 -0.5037684723216592 -1.558140204432866 0.027407799324355903 0.5752634384697437 RPL13A	GAPDH	VIM	JAK1	IFNGR2	KIF5B	STXBP1	ACTR3	FLNB	TYK2 Any process that results in a change in state or activity of a cell (in terms of movement	secretion	enzyme production	gene expression	etc.) as a result of an interferon-gamma stimulus. Interferon gamma is the only member of the type II interferon found so far. [GOC:mah] http://amigo.geneontology.org/amigo/term/GO:0071346 2025.1.Hs down
GOBP_REGULATION_OF_TUBE_SIZE GO:0035150 M23314 35 -0.4790188646396448 -1.5236528305140626 0.02937159842125187 0.5752634384697437 ATP2B1	PER2	ECE1	EXT1	HTR7	PTPN11	GPX1	BBS2	BMPR2	SCARB1	RHOA	KCNMA1	ADD3	GCLC	SVEP1	ITGB1BP1	PRKG1 Ensuring that a tube is of the correct length and diameter. Tube size must be maintained not only during tube formation	but also throughout development and in some physiological processes. [PMID:10887083] http://amigo.geneontology.org/amigo/term/GO:0035150 2025.1.Hs down
GOBP_RESPONSE_TO_ACTIVITY GO:0014823 M16849 31 -0.4891239670233227 -1.499378118347436 0.029408655426671457 0.5752634384697437 FN1	CREB1	HIF1A	HDAC5 Any process that results in a change in state or activity of a cell or an organism (in terms of movement	secretion	enzyme production	gene expression	etc.) as a result of an activity stimulus. [GOC:mtg_muscle] http://amigo.geneontology.org/amigo/term/GO:0014823 2025.1.Hs down
GOBP_CHONDROCYTE_DIFFERENTIATION GO:0002062 M13053 48 -0.4305329972973692 -1.451708072012541 0.029423699690697788 0.5752634384697437 EFEMP1	HIF1A	EXT1	PTPN11	AXIN2	RUNX2	LTBP3	EIF2AK3	POR	SNX19	ZBTB16	BMPR2	PKDCC	TGFB1	RUNX1	TGFBR1	PRKG2	TRPS1 The process in which a chondroblast acquires specialized structural and/or functional features of a chondrocyte. A chondrocyte is a polymorphic cell that forms cartilage. [GOC:dph] http://amigo.geneontology.org/amigo/term/GO:0002062 2025.1.Hs down
GOBP_VIRAL_GENOME_REPLICATION GO:0019079 M13578 48 -0.42935266992572396 -1.4477281429855184 0.029716470418370288 0.5752634384697437 EEF1A1	MX1	PABPC1	PCBP2	VAPB	PPIA Any process involved directly in viral genome replication	including viral nucleotide metabolism. [ISBN:0781702534] http://amigo.geneontology.org/amigo/term/GO:0019079 2025.1.Hs down
GOBP_REGULATION_OF_PEPTIDE_TRANSPORT GO:0090087 M34253 51 -0.42294363862253215 -1.4362884562224425 0.029655839333227952 0.5752634384697437 RPH3AL	PER2	STX1A	HIF1A	PPP3CB	PTPN11	ITPR1	CPT1A	PRKCA Any process that modulates the frequency	rate or extent of the directed movement of peptides	compounds of two or more amino acids where the alpha carboxyl group of one is bound to the alpha amino group of another	into	out of or within a cell	or between cells	by means of some agent such as a transporter or pore. [GOC:dph	GOC:tb] http://amigo.geneontology.org/amigo/term/GO:0090087 2025.1.Hs down
GOBP_SEX_DIFFERENTIATION GO:0007548 M14458 88 0.36389997168198207 1.4030756369576518 0.02848934829944808 0.5752634384697437 GAS2	RHOBTB3	EIF2S2	NRIP1	UBE3A	FLNA	TIPARP	DHCR24	CCND1	SLIT2	FANCA	CENPI	AXL	ACVR2A	ZFY	BAX	NUP107	GREB1L	CTNNA1	NUP210L	CHD7	DMC1	GFRA1 The establishment of the sex of an organism by physical differentiation. [GOC:ai] http://amigo.geneontology.org/amigo/term/GO:0007548 2025.1.Hs up
GOBP_CARBOHYDRATE_METABOLIC_PROCESS GO:0005975 M13504 171 -0.31898494032060426 -1.3363991998208116 0.027754503998073422 0.5752634384697437 PHKG1	GAPDH	PER2	SIAE	B4GALT4	DDIT4	HIF1A	TPI1	HK1	EXT1	CS	FBN1	NUDT5	TALDO1	IGFBP4	GPI	USP7	APP	ENO1	NCOA2	ALDOA	WIPI1	LEPR	NFKB1	MDH2	EDEM2	CPT1A	GK	SLC25A13	TGFB1	ME1	PGLS	GLB1	NNMT	PLA2G4A	ENOSF1	PPARA	INPPL1	COL6A1	ATG3	TFF1	STAT3	SLC2A3	EP300	NAGPA	EDEM1	ST8SIA6	PSEN1	HECTD4	EPM2A
GOBP_RESPONSE_TO_RADIATION GO:0009314 M13646 163 -0.3124499653753119 -1.307971671429776 0.028737267784532953 0.5752634384697437 TIMP1	COL6A3	FBXW7	CREB1	PER2	BARD1	HIF1A	CCND2	COL6A2	EXT1	GPSM2	CEP250	EI24	YY1	YAP1	GPX1	ATM	EYA3	APP	MTA1	ERCC2	SWI5	TP53BP1	CBL	MAP3K4	TGFB1	BRAF	PTPRK	GRB2	SCARA3	COL6A1	DYNLRB1	ERCC5	TOPBP1	BRCA2	EP300	CDC25A	PIK3R1	DNMT3A	NF1	CLK2	XRRA1	EYA1	BRCC3	ERCC1	FBXL3	TANK Any process that results in a change in state or activity of a cell or an organism (in terms of movement	secretion	enzyme production	gene expression
GOBP_CYTOKINE_PRODUCTION GO:0001816 M13156 211 -0.29668874439664616 -1.290154998925216 0.029653196638223245 0.5752634384697437 FN1	DICER1	ATP2B1	GAPDH	CREB1	TNFRSF21	HSP90AA1	HIF1A	HSPB1	HK1	THBS1	IRAK3	SLAMF6	PTPN11	MAPKAPK2	NPTN	SRGN	PRNP	YY1	NPLOC4	APP	IL27RA	GSTP1	EIF2AK3	CD276	STAT5B	RPS3	MAST2	NFKB1	USP22	ZNF131	TGFB1	PRKCA	TLR1	TYK2	ELF4	RUNX1	GPATCH3	PPARA	PTPRS	STAT3	ELF1	PSEN1	CD226	IKBKB	PIK3R1	ITCH	LILRA5	CAPN2	NFAM1
GOBP_ENZYME_LINKED_RECEPTOR_PROTEIN_SIGNALING_PATHWAY GO:0007167 M284 373 -0.2684629401440803 -1.239554189178957 0.028979229740051942 0.5752634384697437 HIP1	FBXW7	CREB1	SNX5	FNTA	LTBP1	HTRA1	CREB3L1	DDIT4	EFEMP1	HIF1A	SIPA1L1	NOMO1	CAMLG	HSPB1	SAP130	THBS1	EXT1	WWTR1	SLC31A1	FSTL1	RBPJ	PTPN11	JAK1	TGFB1I1	MAPKAPK2	DDR1	FBN1	RBPMS	NPTN	IGFBP4	NOMO3	SHC3	ITGB5	LGMN	REPS2	ADAM9	RUNX2	OVOL2	LTBP3	PAK2	EIF2AK3	AP3S1	STAT5B	RAPGEF1	LPXN	ERCC2	PTN	FARP1	ITGA5
GOBP_POSITIVE_REGULATION_OF_MULTICELLULAR_ORGANISMAL_PROCESS GO:0051240 M17126 480 -0.25532423400882204 -1.2026310274427225 0.02989196138540791 0.5752634384697437 FN1	DICER1	WARS2	ATP2B1	RPL13A	GAPDH	VASH2	CREB1	PER2	ARID1B	ACTB	MLH1	HSP90AA1	HIF1A	CUX1	HSPB1	HK1	SAP130	CAPRIN1	THBS1	IRAK3	WWTR1	SLAMF6	RBPJ	PTPN11	RPS19	ROBO2	JAK1	TGFB1I1	MAPKAPK2	CACNA1C	NPTN	AXIN2	YAP1	RNF10	TFRC	NAP1L1	TGM2	APP	ENO1	RUNX2	OVOL2	IL27RA	TERT	LTBP3	NCOA2	DYNC1H1	EIF2AK3	CD276	STAT5B
GOBP_NEGATIVE_REGULATION_OF_GENE_EXPRESSION GO:0010629 M40376 428 -0.25794969178593735 -1.200518545212387 0.029403436458703566 0.5752634384697437 FN1	DICER1	EIF4ENIF1	ATP2B1	RPL13A	GAPDH	FBXW7	BAZ1A	CREB1	APEX1	TNFRSF21	EIF3E	VIM	PABPC1	MLH1	CREB3L1	HIF1A	CAPRIN1	THBS1	HDAC5	PUM2	IRAK3	SND1	PTPN11	UBR5	MAPKAPK2	DDX17	RBM33	NPTN	AXIN2	USP7	SRGN	PRNP	YY1	EIF4A3	YAP1	ATM	ALKBH5	NPLOC4	LGMN	APP	CPNE1	OVOL2	IL27RA	TERT	ZCCHC7	FTO	ENC1	GSTP1	EIF2AK1
GOBP_NEGATIVE_REGULATION_OF_CELL_ADHESION GO:0007162 M17747 99 0.34906293170725883 1.3527126450398181 0.030528806676691236 0.5779949701057593 ACTN4	PTK2	DLG1	CORO1C	ADAM22	SCRIB	PLXND1	HSPG2	DUSP3	TBCD	SEMA5A	TMX1	PODXL	DUSP22	SDC4	ABL1 Any process that stops	prevents	or reduces the frequency	rate or extent of cell adhesion. [GOC:go_curators] http://amigo.geneontology.org/amigo/term/GO:0007162 2025.1.Hs up
GOBP_RESPONSE_TO_ETHANOL GO:0045471 M10221 36 -0.4640001443155349 -1.4859417787226923 0.030936872805286758 0.5808397869192589 RPS6	CREB1	RPL10A	GSTP1	EEF2	CPT1A	GOT2	CBL	TGFB1	PRKCA	SPI1	PPARA	STAT3 Any process that results in a change in state or activity of a cell or an organism (in terms of movement	secretion	enzyme production	gene expression	etc.) as a result of an ethanol stimulus. [GOC:go_curators] http://amigo.geneontology.org/amigo/term/GO:0045471 2025.1.Hs down
GOBP_PROTEIN_TARGETING_TO_MITOCHONDRION GO:0006626 M15596 44 -0.43522871966050963 -1.4555024610190295 0.032451207968265734 0.5944111508333553 FBXW7	ABLIM3	HSP90AA1	PITRM1	BNIP3L	HUWE1	HSPA4	VPS11	HPS4	NPEPPS	UBE2J2	MFN2	TOMM20	UBL5	PINK1	TOMM6 The process of directing proteins towards and into the mitochondrion	usually mediated by mitochondrial proteins that recognize signals contained within the imported protein. [GOC:mcc	ISBN:0716731363] http://amigo.geneontology.org/amigo/term/GO:0006626 2025.1.Hs down
GOBP_NEGATIVE_REGULATION_OF_IMMUNE_SYSTEM_PROCESS GO:0002683 M3748 140 -0.32673113225021894 -1.3412576510662233 0.032217270934353864 0.5944111508333553 FN1	FBXW7	TNFRSF21	PCBP2	CNN2	PPT1	THBS1	PPP3CB	IRAK3	PTPN11	RPS19	PAG1	FBN1	BCR	PRNP	GPX1	ATM	NPLOC4	YWHAE	IL27RA	YWHAZ	LPXN	GPR137B	TGFB1	SPI1	SAMHD1	RUNX1	GRB2	GPATCH3	PTPRS	GRN	ADAR	ELF1	PIK3R1	ITCH	CD59	NF1 Any process that stops	prevents	or reduces the frequency	rate	or extent of an immune system process. [GOC:add] http://amigo.geneontology.org/amigo/term/GO:0002683 2025.1.Hs down
GOBP_INTRINSIC_APOPTOTIC_SIGNALING_PATHWAY GO:0097193 M13922 123 -0.3318053225626917 -1.3312164669912332 0.032323195313558574 0.5944111508333553 TPT1	FBXW7	CD44	MLH1	CREB3L1	DDIT4	HIF1A	HSPB1	PPIA	EI24	RPS27L	GPX1	ATM	P4HB	APP	SERINC3	ENO1	EIF2AK3	ITPR1	ERCC2	RPS3	HIPK2 The series of molecular signals in which an intracellular signal is conveyed to trigger the apoptotic death of a cell. The pathway starts with reception of an intracellular signal (e.g. DNA damage	endoplasmic reticulum stress	oxidative stress etc.)	and ends when the execution phase of apoptosis is triggered. The intrinsic apoptotic signaling pathway is crucially regulated by permeabilization of the mitochondrial outer membrane (MOMP). [GOC:mtg_apoptosis	GOC:yaf	PMID:11919192	PMID:17340152	PMID:18852119] http://amigo.geneontology.org/amigo/term/GO:0097193 2025.1.Hs down
GOBP_MORPHOGENESIS_OF_AN_EPITHELIAL_SHEET GO:0002011 M13139 26 0.5152661293343739 1.5247011711266378 0.033033211208930414 0.6001921359170985 COL5A1	FERMT2	PHACTR4	CLASP1	FLNA	ARHGAP12	RREB1 The process in which the anatomical structures of an epithelial sheet are generated and organized. An epithelial sheet is a flat surface consisting of closely packed epithelial cells. [GOC:jl] http://amigo.geneontology.org/amigo/term/GO:0002011 2025.1.Hs up
GOBP_UNSATURATED_FATTY_ACID_BIOSYNTHETIC_PROCESS GO:0006636 M16551 15 0.6213799951724147 1.6218316019843662 0.0341149253224796 0.6016826936260723 FADS2	SCD	TMEM135	DAGLB	PTGES3	FADS1 The chemical reactions and pathways resulting in the formation of an unsaturated fatty acid	any fatty acid containing one or more double bonds between carbon atoms. [GOC:mah	MetaCyc:PWY-762	MetaCyc:PWY-782] http://amigo.geneontology.org/amigo/term/GO:0006636 2025.1.Hs up
GOBP_INTERLEUKIN_1_BETA_PRODUCTION GO:0032611 M49411 17 -0.5962908090914947 -1.603017440719963 0.035251715738411696 0.6016826936260723 HSPB1	HK1	APP	GSTP1	ELF4	STAT3	LILRA5 The appearance of interleukin-1 beta due to biosynthesis or secretion following a cellular stimulus	resulting in an increase in its intracellular or extracellular levels. [GOC:mah] http://amigo.geneontology.org/amigo/term/GO:0032611 2025.1.Hs down
GOBP_METANEPHROS_DEVELOPMENT GO:0001656 M10490 21 -0.5533993095770602 -1.5451839037231085 0.034999836874750376 0.6016826936260723 PKD2	WWTR1	ROBO2	FBN1	YAP1	FRAS1	NF1	EYA1	DLG5	GLI3 The process whose specific outcome is the progression of the metanephros over time	from its formation to the mature structure. In mammals	the metanephros is the excretory organ of the fetus	which develops into the mature kidney and is formed from the rear portion of the nephrogenic cord. The metanephros is an endocrine and metabolic organ that filters the blood and excretes the end products of body metabolism in the form of urine. [GOC:bf	ISBN:0192800752] http://amigo.geneontology.org/amigo/term/GO:0001656 2025.1.Hs down
GOBP_POSITIVE_REGULATION_OF_HORMONE_SECRETION GO:0046887 M13625 38 -0.4615437965368784 -1.5013445857927956 0.03465139047130718 0.6016826936260723 RPH3AL	CREB1	HIF1A	PPP3CB	PTPN11	ITPR1	PRKCA Any process that activates or increases the frequency	rate or extent of the regulated release of a hormone from a cell. [GOC:ai] http://amigo.geneontology.org/amigo/term/GO:0046887 2025.1.Hs down
GOBP_RHO_PROTEIN_SIGNAL_TRANSDUCTION GO:0007266 M7069 63 0.40826731945533967 1.4681708687195272 0.03372573136006103 0.6016826936260723 FERMT2	ARHGEF12	ARHGEF28	FXR1	PHACTR4	MYO9B	ARHGAP1	ABL2	MET	DOCK7	ABL1	ARHGEF2	ROBO1	RHOG	CELSR1	LPAR1	PKP4	PDPN An intracellular signaling cassette in which a small monomeric GTPase of the Rho subfamily relays a signal. [GOC:bf] http://amigo.geneontology.org/amigo/term/GO:0007266 2025.1.Hs up
GOBP_SISTER_CHROMATID_COHESION GO:0007062 M13145 31 -0.47739216589236194 -1.4634150351813895 0.034252485505231536 0.6016826936260723 ESPL1	FBXW7	PDS5B	PHB2	AXIN2 The cell cycle process in which the sister chromatids of a replicated chromosome become tethered to each other. [GOC:jh	GOC:mah	ISBN:0815316194] http://amigo.geneontology.org/amigo/term/GO:0007062 2025.1.Hs down
GOBP_RESPONSE_TO_BACTERIUM GO:0009617 M18818 134 -0.33018672718530856 -1.3469100454644363 0.03505198458080206 0.6016826936260723 RPL13A	VIM	MLH1	HDAC5	ST13	IRAK3	RBPJ	CEP192	PTPN11	RPS19	MAPKAPK2	BCR	CHMP5	GPX1	FKBP5	ADAM9	APP	IL27RA	GSTP1	NFKB1	PRKCA	TLR1	SPI1	RAB7A	SCARB1	COL6A1	GRN	RHOA	HADHB	RPL39	CDK19	CAPN2	RAC1	OTUD5	MAPKAPK3	MR1	ZNFX1	PRDX3	AKAP8	E2F1	PLCG2	MTDH	MEF2C Any process that results in a change in state or activity of a cell or an organism (in terms of movement	secretion	enzyme production	gene expression	etc.) as a result of a stimulus from a bacterium. [GOC:hb] http://amigo.geneontology.org/amigo/term/GO:0009617 2025.1.Hs down
GOBP_SMALL_GTPASE_MEDIATED_SIGNAL_TRANSDUCTION GO:0007264 M15802 232 0.2899653727351448 1.2750682862400429 0.03418356702332966 0.6016826936260723 FERMT2	SQSTM1	BCAR3	TRIO	ARHGEF12	ARHGAP11B	TNS3	CADM4	ARHGEF28	FXR1	PICALM	PHACTR4	ARHGAP23	MYO9A	MYO9B	ARHGAP12	RALGPS1	DHCR24	ARHGAP1	ABL2	FAM13B	MET	ARFGEF3	DOCK7	DENND3	DENND1A	DNMBP	SLIT2	RRAS2	ABL1	RASGRF2	ARHGEF2	G3BP1	OBSCN	ROBO1	PLEKHG4B	ABR	RHOG	TNK2	MAPKAPK5	CELSR1	HACE1	FOXM1	SIPA1L3	DENND4A	ARHGAP32	LPAR1	PKP4	ARHGEF10L	RHEB
GOBP_PLASMA_MEMBRANE_ORGANIZATION GO:0007009 M11086 48 0.4368308486442439 1.4880829746663768 0.0364384786476017 0.6172623488198995 COL5A1	MYH9	ASAP1	PLEC	ATP8B1	MYOF	UGCG	VMP1	AHNAK	AKT2	ANXA2	MTSS1	TPST2 A process that is carried out at the cellular level which results in the assembly	arrangement of constituent parts	or disassembly of the plasma membrane. [GOC:dph	GOC:jl	GOC:mah] http://amigo.geneontology.org/amigo/term/GO:0007009 2025.1.Hs up
GOBP_STEM_CELL_DIVISION GO:0017145 M12183 16 -0.5902087039799851 -1.5514448885048622 0.03705945309029467 0.6230966254659245 EXT1	WWTR1	MLLT3	ZBTB16	NCOA3	ETV5 The self-renewing division of a stem cell. A stem cell is an undifferentiated cell	in the embryo or adult	that can undergo unlimited division and give rise to one or several different cell types. [GOC:jid	ISBN:0582227089] http://amigo.geneontology.org/amigo/term/GO:0017145 2025.1.Hs down
GOBP_REGULATION_OF_MICROTUBULE_DEPOLYMERIZATION GO:0031114 M23004 17 0.5799306226968983 1.5596886800018641 0.03736253338847733 0.6235391683276995 ATXN7	MID1	CLASP1	NAV3	ARHGEF2	DIAPH3	TAOK1	CLASP2	TTBK2	TPX2 Any process that modulates the frequency	rate or extent of microtubule depolymerization. [GOC:mah] http://amigo.geneontology.org/amigo/term/GO:0031114 2025.1.Hs up
GOBP_PLACENTA_BLOOD_VESSEL_DEVELOPMENT GO:0060674 M12124 17 -0.593553586171157 -1.5956589236783791 0.037662032654116426 0.6239158791891494 VASH2	PKD2	RBPJ	OVOL2 The process whose specific outcome is the progression of a blood vessel of the placenta over time	from its formation to the mature structure. [GOC:dph	PMID:16916377] http://amigo.geneontology.org/amigo/term/GO:0060674 2025.1.Hs down
GOBP_POSITIVE_REGULATION_OF_ESTABLISHMENT_OF_PROTEIN_LOCALIZATION_TO_MITOCHONDRION GO:1903749 M25193 17 -0.5910814687954392 -1.589013093810868 0.03886719238925457 0.6326600971617568 FBXW7	ABLIM3	HUWE1	VPS11	HPS4	NPEPPS	UBE2J2	UBL5	PINK1 Any process that activates or increases the frequency	rate or extent of establishment of protein localization to mitochondrion. [GO_REF:0000058	GOC:TermGenie	PMID:16857185] http://amigo.geneontology.org/amigo/term/GO:1903749 2025.1.Hs down
GOBP_CELLULAR_RESPONSE_TO_VIRUS GO:0098586 M10352 22 -0.5365413514190704 -1.5044699818345295 0.03851097191476249 0.6326600971617568 HSP90AA1	HIF1A	EXT1	JAK1	IFNGR2	NFKB1	TGFB1	TYK2	IFI6	ADAR	GBF1 Any process that results in a change in state or activity of a cell (in terms of movement	secretion	enzyme production	gene expression	etc.) as a result of a stimulus from a virus. [GOC:dos] http://amigo.geneontology.org/amigo/term/GO:0098586 2025.1.Hs down
GOBP_GOLGI_VESICLE_TRANSPORT GO:0048193 M18265 154 -0.3134435588401597 -1.3058605989785188 0.03903229183554558 0.6326600971617568 UVRAG	CUX1	VAPB	COPZ2	SEC23A	RAB11FIP3	STX5	RAB2A	TRAPPC4	SEC24A	P4HB	RAB31	TMED4	USO1	AP3S1	WIPI1	BBS2	TRAPPC9	EPS15	PKDCC	RABGGTA	PGAP1	VCP	SEC22C	SEC13	VAPA	VTI1B	ARCN1	ERGIC2	STXBP5	YIF1A	LMAN2L	TFG	KLHL20	COPA	KIF16B	COPB2	RABGGTB	STX18	PREB	ARL8B	AP4M1	GBF1	AP3D1	GOLPH3L	SEC23IP	RABEP1 The directed movement of substances into	out of or within the Golgi apparatus	mediated by vesicles. [GOC:jid	ISBN:0716731363
GOBP_ROOF_OF_MOUTH_DEVELOPMENT GO:0060021 M24078 34 0.4791755304521815 1.5208775377996793 0.04111273354605069 0.6613192465120233 DLG1	ASPH	PRRX1	GABRB3	TIPARP	SKI	NPRL3	SATB2	WDPCP	CHD7 The biological process whose specific outcome is the progression of the roof of the mouth from an initial condition to its mature state. This process begins with the formation of the structure and ends with the mature structure. The roof of the mouth is the partition that separates the nasal and oral cavities. [GOC:dph	ISBN:0721662544] http://amigo.geneontology.org/amigo/term/GO:0060021 2025.1.Hs up
GOBP_VESICLE_MEDIATED_TRANSPORT_IN_SYNAPSE GO:0099003 M24840 109 -0.34462802313169566 -1.3661194272077917 0.04138748946213728 0.6613192465120233 MX1	HIP1	RPH3AL	ACTB	STX1A	PPP3CB	MKLN1	STXBP1	AP3S1	CLTA	EPS15	ATP6V1E1	PIP5K1C	AP2A2	AAK1	BRAF	UNC13B	RAB7A	SNX9	STXBP5	ATP2A2	VPS35	ACTG1	PSEN1	OSBPL2	AP2B1	AP3D1	RABEP1	CAPN2	RAC1	VAC14	RAB5A	PRKCB	SYNDIG1	EFR3A	PPFIA2	DNM2	USP46	FBXO45	EPS15L1	LRRK2	GIT2	RIMS2	STON2	CACNA1B	SYN3	SCRN1 Any vesicle-mediated transport that occurs in a synapse. [GOC:dos] http://amigo.geneontology.org/amigo/term/GO:0099003 2025.1.Hs down
GOBP_REGULATION_OF_PEPTIDYL_TYROSINE_PHOSPHORYLATION GO:0050730 M16603 21 0.5437498712958894 1.5496771992677918 0.04173003000258016 0.6620968844775571 GPRC5A	CADM4	ITGB2	ABL1	ARHGEF2	TNK2 Any process that modulates the frequency	rate or extent of the phosphorylation of peptidyl-tyrosine. [GOC:ai] http://amigo.geneontology.org/amigo/term/GO:0050730 2025.1.Hs up
GOBP_BLOOD_VESSEL_REMODELING GO:0001974 M14110 19 -0.5532955402591688 -1.5235819920747364 0.042144841434017345 0.6640022919639236 CST3	EXT1	RBPJ	SEMA3C	BCR	BMPR2	TGFB1	BGN The reorganization or renovation of existing blood vessels. [GOC:hjd] http://amigo.geneontology.org/amigo/term/GO:0001974 2025.1.Hs down
GOBP_GLUCOSE_METABOLIC_PROCESS GO:0006006 M13870 63 -0.3984908538938329 -1.4150364490269085 0.04381520775821632 0.6855254380504262 GAPDH	PER2	TPI1	HK1	FBN1	IGFBP4	GPI	USP7	ENO1	NCOA2	LEPR	MDH2	CPT1A	SLC25A13	NNMT	PPARA	INPPL1	EP300	HECTD4	CLK2	LCMT1	PC	ADPGK	DDB1	LIPA	KAT2A	KBTBD2	PFKL	ACACB	G6PD The chemical reactions and pathways involving glucose	the aldohexose gluco-hexose. D-glucose is dextrorotatory and is sometimes known as dextrose; it is an important source of energy for living organisms and is found free as well as combined in homo- and hetero-oligosaccharides and polysaccharides. [ISBN:0198506732] http://amigo.geneontology.org/amigo/term/GO:0006006 2025.1.Hs down
GOBP_INTRINSIC_APOPTOTIC_SIGNALING_PATHWAY_IN_RESPONSE_TO_DNA_DAMAGE_BY_P53_CLASS_MEDIATOR GO:0042771 M10278 19 -0.5490727029489195 -1.5119537781940617 0.04573157867408264 0.7105741155359185 CD44	DDIT4	RPS27L	HIPK2	HIPK1	BRCA2	EP300	PPP2R5C The series of molecular signals in which an intracellular signal is conveyed to trigger the apoptotic death of a cell. The pathway is induced by the cell cycle regulator phosphoprotein p53	or an equivalent protein	in response to the detection of DNA damage	and ends when the execution phase of apoptosis is triggered. [GOC:go_curators	GOC:mtg_apoptosis] http://amigo.geneontology.org/amigo/term/GO:0042771 2025.1.Hs down
GOBP_PEPTIDYL_THREONINE_PHOSPHORYLATION GO:0018107 M49379 21 0.5357748443670494 1.5269485182186981 0.04705718361765822 0.7230049569747096 CEMIP	MAP3K10	CADM4	PRKDC	PARD3 The phosphorylation of peptidyl-threonine to form peptidyl-O-phospho-L-threonine. [RESID:AA0038] http://amigo.geneontology.org/amigo/term/GO:0018107 2025.1.Hs up
GOBP_INTERLEUKIN_1_PRODUCTION GO:0032612 M11670 21 -0.5359756013493703 -1.49653398126988 0.04717342595440848 0.7230049569747096 HSPB1	HK1	APP	GSTP1	ELF4	STAT3	LILRA5	HDAC3 The appearance of interleukin-1 due to biosynthesis or secretion following a cellular stimulus	resulting in an increase in its intracellular or extracellular levels. [GOC:mah] http://amigo.geneontology.org/amigo/term/GO:0032612 2025.1.Hs down
GOBP_VASOCONSTRICTION GO:0042310 M40429 19 -0.540633287794041 -1.4887145868071354 0.05168986083499006 0.7246530466376795 ATP2B1	PER2	ECE1	HTR7	BBS2	BMPR2 A decrease in the diameter of blood vessels	especially arteries	due to constriction of smooth muscle cells that line the vessels	and usually causing an increase in blood pressure. [GOC:pr	ISBN:0192800752] http://amigo.geneontology.org/amigo/term/GO:0042310 2025.1.Hs down
GOBP_LUNG_MORPHOGENESIS GO:0060425 M11145 23 -0.5021753935263328 -1.4482471019166248 0.05090926928334232 0.7246530466376795 RPL13A	EXT1	YAP1	HIPK2	MAP2K2	COL6A1	DLG5	AP3B1 The process in which the anatomical structures of the lung are generated and organized. [GOC:dph] http://amigo.geneontology.org/amigo/term/GO:0060425 2025.1.Hs down
GOBP_NEGATIVE_REGULATION_OF_INTRINSIC_APOPTOTIC_SIGNALING_PATHWAY GO:2001243 M12485 41 -0.4396694189404618 -1.4466722148804116 0.05089994081333866 0.7246530466376795 TPT1	CD44	CREB3L1	HIF1A	HSPB1	PPIA	GPX1	ENO1 Any process that stops	prevents or reduces the frequency	rate or extent of intrinsic apoptotic signaling pathway. [GOC:mtg_apoptosis] http://amigo.geneontology.org/amigo/term/GO:2001243 2025.1.Hs down
GOBP_NEGATIVE_REGULATION_OF_CATALYTIC_ACTIVITY GO:0043086 M13991 55 -0.4135758182714289 -1.4351792020732288 0.048638132295719845 0.7246530466376795 TIMP1	CEP85	GAPDH	CDK5RAP1	RPL5	RPL11	CHP1	PPIA Any process that stops or reduces the activity of an enzyme. [GOC:ebc	GOC:jl	GOC:tb	GOC:vw] http://amigo.geneontology.org/amigo/term/GO:0043086 2025.1.Hs down
GOBP_NEGATIVE_REGULATION_OF_PROTEOLYSIS_INVOLVED_IN_PROTEIN_CATABOLIC_PROCESS GO:1903051 M40559 29 -0.4739935073283097 -1.4285438677786775 0.05179282868525897 0.7246530466376795 RPL5	RPL11	CAMLG	USP7	HIPK2	SUFU	HSP90AB1	EIF3H	PSMF1	PSEN1 Any process that stops	prevents or reduces the frequency	rate or extent of proteolysis involved in protein catabolic process. [GO_REF:0000058	GOC:BHF	GOC:rl	GOC:TermGenie	PMID:18307834] http://amigo.geneontology.org/amigo/term/GO:1903051 2025.1.Hs down
GOBP_MONOSACCHARIDE_BIOSYNTHETIC_PROCESS GO:0046364 M12988 34 -0.4553795677138436 -1.4268662972694757 0.0499001996007984 0.7246530466376795 PER2	TPI1	GPI	USP7	ENO1	LEPR	MDH2	SLC25A13	NNMT	PPARA	EP300	CLK2	PC	DDB1	KAT2A The chemical reactions and pathways resulting in the formation of monosaccharides	polyhydric alcohols containing either an aldehyde or a keto group and between three to ten or more carbon atoms. [ISBN:0198506732] http://amigo.geneontology.org/amigo/term/GO:0046364 2025.1.Hs down
GOBP_PROTEIN_DEPOLYMERIZATION GO:0051261 M14516 49 0.41805460517015 1.4245538325396594 0.04898575671674258 0.7246530466376795 ASPH	ATXN7	MID1	CLASP1	SEMA5A	MICAL2	NAV3	ARHGEF2	MTPN	DIAPH3	TAOK1	GAK	CLASP2	DNAJC6 The process in which protein polymers	compounds composed of a large number of component monomers	are broken down. Depolymerization occurs by the successive removal of monomers from an existing poly- or oligomeric protein. [GOC:ai] http://amigo.geneontology.org/amigo/term/GO:0051261 2025.1.Hs up
GOBP_VESICLE_BUDDING_FROM_MEMBRANE GO:0006900 M22483 43 -0.429324083838667 -1.4176779564976036 0.05189620758483034 0.7246530466376795 MX1	VAPB	SEC23A	CHMP4A	TRAPPC4	SEC24A	CHMP5	AP3S1	TRAPPC9	SEC13	VAPA	RAB7A	TFG	PREB	GBF1	AP3D1	GOLPH3L The evagination of a membrane	resulting in formation of a vesicle. [GOC:jid	GOC:tb] http://amigo.geneontology.org/amigo/term/GO:0006900 2025.1.Hs down
GOBP_REGULATION_OF_PROTEIN_DEPOLYMERIZATION GO:1901879 M25036 36 0.4437795342249673 1.411479731467073 0.05186721991701245 0.7246530466376795 ASPH	ATXN7	MID1	CLASP1	SEMA5A	NAV3	ARHGEF2	MTPN	DIAPH3	TAOK1	CLASP2 Any process that modulates the frequency	rate or extent of protein depolymerization. [GOC:BHF	GOC:rl	GOC:TermGenie	PMID:12032137] http://amigo.geneontology.org/amigo/term/GO:1901879 2025.1.Hs up
GOBP_BIOLOGICAL_PROCESS_INVOLVED_IN_INTERACTION_WITH_HOST GO:0051701 M13571 64 -0.39494309555921003 -1.4093365051656666 0.05142857142857143 0.7246530466376795 UVRAG	VAPB	PPIA	EXOC7	CHMP4A	CHMP5	TFRC	ITGB5	P4HB	TRIM62	NUP153	ITGA5	HSP90AB1	EPS15	CBL	VAPA	RAB7A	KIAA0319L	SLC20A2	SCARB1	PPARA	ICAM1	ARL8B	ITCH	CHMP3 An interaction between two organisms living together in more or less intimate association. The term host is used for the larger (macro) of the two members of a symbiosis; the various forms of symbiosis include parasitism	commensalism and mutualism. [GOC:cc] http://amigo.geneontology.org/amigo/term/GO:0051701 2025.1.Hs down
GOBP_REGULATION_OF_WOUND_HEALING GO:0061041 M10495 36 0.4428967715199535 1.4086720272587252 0.05186721991701245 0.7246530466376795 PTK2	FERMT2	CADM4	CLASP1	TMX1	RREB1	ANXA2	SERPINE2	ST3GAL4	CLASP2 Any process that modulates the rate	frequency	or extent of the series of events that restore integrity to a damaged tissue	following an injury. [GOC:BHF	GOC:dph] http://amigo.geneontology.org/amigo/term/GO:0061041 2025.1.Hs up
GOBP_PEPTIDYL_TYROSINE_MODIFICATION GO:0018212 M19329 42 0.4135410356235933 1.3660767451818665 0.052313883299798795 0.7246530466376795 PTK2	GPRC5A	CADM4	ITGB2	ABL2	FGFR1	ABL1	DYRK1A	ARHGEF2	TNK2	TPST2 The modification of peptidyl-tyrosine. [GOC:go_curators] http://amigo.geneontology.org/amigo/term/GO:0018212 2025.1.Hs up
GOBP_SECONDARY_ALCOHOL_METABOLIC_PROCESS GO:1902652 M49619 43 0.409243294394799 1.3617142329499428 0.05189620758483034 0.7246530466376795 HMGCS1	LDLR	DHCR24	KPNB1	CYP24A1	SCAP	FGFR1	LBR	LRP5	EPHX2	CAT	FDXR	SREBF2	SOAT1	MVK The chemical reactions and pathways involving secondary alcohol. [GO_REF:0000068	GOC:mengo_curators	GOC:TermGenie	PMID:11288200] http://amigo.geneontology.org/amigo/term/GO:1902652 2025.1.Hs up
GOBP_REGULATION_OF_PROTEIN_STABILITY GO:0031647 M13931 156 -0.3061897895425373 -1.2753153966743405 0.050880626223091974 0.7246530466376795 HIP1	GAPDH	FBXW7	CREB1	OTUD3	NCKAP1	RPL5	HSP90AA1	RPL11	CAMLG	CHP1	PHB2	CHFR	PFDN2	ATP1B3	DAD1	USP7	PRNP	AHSA1	STXBP1	KDM8	TERT	UBR4	YWHAZ	VPS11	HPS4	HSP90AB1	AAK1	RUVBL1	IFT46	NF2	NEDD4L Any process that affects the structure and integrity of a protein	altering the likelihood of its degradation or aggregation. [GOC:dph	GOC:mah	GOC:tb] http://amigo.geneontology.org/amigo/term/GO:0031647 2025.1.Hs down
GOBP_ESTABLISHMENT_OF_PROTEIN_LOCALIZATION_TO_ORGANELLE GO:0072594 M11490 209 -0.2912371629450647 -1.2680639529420155 0.05128205128205128 0.7246530466376795 RBM22	EIF4ENIF1	FBXW7	ABLIM3	HSP90AA1	HK1	CHP1	PITRM1	UBR5	POM121	PHB2	LONP2	EI24	BNIP3L	E2F3	TNPO3	CHMP4A	USP7	HUWE1	SRP68	TERT	NUP153	HSPA4	VPS11	HPS4	SUFU	EPS15	CBL	TGFB1	SEC13	JUP	IFT122	NPEPPS	RAB7A	VPS13D	KPNA5	NUP155	UBE2J2	MVB12B	STAT3	PEX6	BRCA2	CCT6A	EP300	NAGPA	MFN2	EDEM1	ADAR	AP4M1	PSEN1
GOBP_INTRACELLULAR_PROTEIN_TRANSPORT GO:0006886 M10598 312 -0.2718224988259866 -1.231734797511865 0.05242718446601942 0.7246530466376795 RBM22	EIF4ENIF1	RPH3AL	SNX5	BARD1	STX1A	HSP90AA1	HSPB1	CHP1	COPZ2	SEC23A	PTPN11	UBR5	POM121	PHB2	LONP2	ARL1	EI24	BCR	STX5	E2F3	TNPO3	KIF5B	SEC24A	XPO6	KIF20B	NPLOC4	RAB31	TMED4	STXBP1	YWHAE	TERT	NUP153	RANGAP1	USO1	AP3S1	CLTA	XPO7	VPS11	EDEM2	RANBP3	SUFU	WLS	AP1B1	AP2A2	VCP	TGFB1	SEC13	JUP	VTI1B
GOBP_ACETYL_COA_METABOLIC_PROCESS GO:0006084 M11586 17 0.5533042376893927 1.488078612072613 0.0536779324055666 0.7374169616447656 HMGCS1	PDHX	PDK1	FASN	DLST	ACACA	DLAT	PDK3	MVK	MLYCD The chemical reactions and pathways involving acetyl-CoA	a derivative of coenzyme A in which the sulfhydryl group is acetylated; it is a metabolite derived from several pathways (e.g. glycolysis	fatty acid oxidation	amino-acid catabolism) and is further metabolized by the tricarboxylic acid cycle. It is a key intermediate in lipid and terpenoid biosynthesis. [ISBN:0198547684] http://amigo.geneontology.org/amigo/term/GO:0006084 2025.1.Hs up
GOBP_REGULATION_OF_SPROUTING_ANGIOGENESIS GO:1903670 M15869 17 -0.5575910349821854 -1.4989802630487796 0.056112224448897796 0.749066924066924 CREB3L1	THBS1	JAK1	TGM2	ITGA5	SMAD1	TJP1 Any process that modulates the frequency	rate or extent of sprouting angiogenesis. [GO_REF:0000058	GOC:TermGenie	PMID:16756958] http://amigo.geneontology.org/amigo/term/GO:1903670 2025.1.Hs down
GOBP_PROTEIN_INSERTION_INTO_ER_MEMBRANE GO:0045048 M23682 15 -0.5768838444645272 -1.4980561278295592 0.057539682539682536 0.749066924066924 NOMO1	CAMLG	EMC1	NOMO3	WNK1	EMC2 The process that results in incorporation of a protein into an endoplasmic reticulum (ER) membrane. It depends on specific topogenic sequences of amino acids that ensure that a protein acquires the proper orientation during its insertion into the ER membrane. [ISBN:0716731363] http://amigo.geneontology.org/amigo/term/GO:0045048 2025.1.Hs down
GOBP_POSITIVE_REGULATION_OF_INTERLEUKIN_1_PRODUCTION GO:0032732 M13347 15 -0.5730743568814288 -1.4881636229994952 0.061507936507936505 0.749066924066924 HSPB1	HK1	APP	STAT3	LILRA5 Any process that activates or increases the frequency	rate	or extent of interleukin-1 production. [GOC:mah] http://amigo.geneontology.org/amigo/term/GO:0032732 2025.1.Hs down
GOBP_SYNAPTIC_VESICLE_TRANSPORT GO:0048489 M29223 20 -0.5249988600655314 -1.4495397620555772 0.05846774193548387 0.749066924066924 MX1	KIF5B	AP3S1	AP3D1	PINK1	AP3B1	KIF1B	DNM2	LRRK2 The directed movement of synaptic vesicles. [GOC:aruk	GOC:bc	GOC:jid	GOC:lmg	GOC:pr] http://amigo.geneontology.org/amigo/term/GO:0048489 2025.1.Hs down
GOBP_REGULATION_OF_CARTILAGE_DEVELOPMENT GO:0061035 M10632 28 -0.4817577837400964 -1.4478358100190907 0.05807477970315383 0.749066924066924 EFEMP1	PTPN11	AXIN2	RUNX2	LTBP3	POR	SMAD1	ZBTB16	BMPR2	PKDCC	TGFB1	TGFBR1	PRKG2	TRPS1 Any process that modulates the rate	frequency	or extent of cartilage development	the process whose specific outcome is the progression of the cartilage over time	from its formation to the mature structure. Cartilage is a connective tissue dominated by extracellular matrix containing collagen type II and large amounts of proteoglycan	particularly chondroitin sulfate. [GOC:dph] http://amigo.geneontology.org/amigo/term/GO:0061035 2025.1.Hs down
GOBP_REGULATION_OF_RELEASE_OF_SEQUESTERED_CALCIUM_ION_INTO_CYTOSOL GO:0051279 M15552 28 0.482339190057965 1.4448046573979043 0.06019946676546433 0.749066924066924 ASPH	CEMIP	FKBP1A	PDE4D	ABL1	JPH1	HTT	BAX	TRPC1	CHD7	PTK2B	PDPK1	SLC8A1 Any process that modulates the frequency	rate or extent of the release into the cytosolic compartment of calcium ions sequestered in the endoplasmic reticulum or mitochondria. [GOC:ai	GOC:tb] http://amigo.geneontology.org/amigo/term/GO:0051279 2025.1.Hs up
GOBP_MAINTENANCE_OF_PROTEIN_LOCATION GO:0045185 M23696 32 -0.46400932558079594 -1.435166401119249 0.061173109393551944 0.749066924066924 LTBP1	BARD1	HK1	FBN1	SRGN	CHCHD10	RANGAP1	CIZ1	VPS13D	HDAC3	VPS13C	PINK1	GOLPH3 Any process in which a protein is maintained in a location and prevented from moving elsewhere. These include sequestration	stabilization to prevent transport elsewhere and the active retrieval of proteins that do move away. [GOC:bf] http://amigo.geneontology.org/amigo/term/GO:0045185 2025.1.Hs down
GOBP_MICROTUBULE_DEPOLYMERIZATION GO:0007019 M12616 25 0.487808955879848 1.4335497597539073 0.06012024048096192 0.749066924066924 ATXN7	MID1	CLASP1	NAV3	ARHGEF2	DIAPH3	TAOK1	CLASP2	TTBK2	TPX2	KIF2C	KIF18A	CKAP5	CCDC88C	KIF14 The removal of tubulin heterodimers from one or both ends of a microtubule. [ISBN:0815316194] http://amigo.geneontology.org/amigo/term/GO:0007019 2025.1.Hs up
GOBP_REGULATION_OF_EXTRACELLULAR_MATRIX_ORGANIZATION GO:1903053 M11743 27 -0.47841089289826344 -1.4295368158265458 0.05708661417322835 0.749066924066924 LAMC1	PRDM5	CST3	DDR1	LAMB1	AXIN2	NID1	TGFB1	RUNX1	TGFBR1	EFEMP2	COL6A1	STAT3	DDR2 Any process that modulates the frequency	rate or extent of extracellular matrix organization. [GO_REF:0000058	GOC:BHF	GOC:rl	GOC:TermGenie	PMID:22357537] http://amigo.geneontology.org/amigo/term/GO:1903053 2025.1.Hs down
GOBP_TRANSLATIONAL_ELONGATION GO:0006414 M14270 27 -0.47500670884407387 -1.4193647931875284 0.0610236220472441 0.749066924066924 EEF1A1	TCF25	RPLP1	EEFSEC	EIF4A3	EEF2	KLHDC10 The successive addition of amino acid residues to a nascent polypeptide chain during protein biosynthesis. [GOC:ems] http://amigo.geneontology.org/amigo/term/GO:0006414 2025.1.Hs down
GOBP_CYTOPLASMIC_TRANSLATIONAL_INITIATION GO:0002183 M13161 29 -0.46795667502867805 -1.4103497794016953 0.055776892430278883 0.749066924066924 RPL13A	EIF3F	EIF3E	EIF4B	EIF3L	EIF4A1	EIF3D	SLBP	EIF2S3	EIF3H	EIF3M	EIF2B3 The process preceding formation of the peptide bond between the first two amino acids of a protein in the cytoplasm. This includes the formation of a complex of the ribosome	mRNA or circRNA	and an initiation complex that contains the first aminoacyl-tRNA. [GOC:hjd] http://amigo.geneontology.org/amigo/term/GO:0002183 2025.1.Hs down
GOBP_REGULATION_OF_ERBB_SIGNALING_PATHWAY GO:1901184 M10477 33 -0.450097151958337 -1.4002679992166138 0.06 0.749066924066924 HIP1	FBXW7	SNX5	RBPJ	LGMN	CBL	TGFB1	RAB7A	MVB12B	IFI6 Any process that modulates the frequency	rate or extent of ERBB signaling pathway. [GOC:BHF	GOC:TermGenie] http://amigo.geneontology.org/amigo/term/GO:1901184 2025.1.Hs down
GOBP_ENDOPLASMIC_RETICULUM_ORGANIZATION GO:0007029 M15310 44 -0.4184013976880584 -1.3992281219488343 0.061386138613861385 0.749066924066924 NOMO1	CAMLG	VAPB	EMC1	NOMO3	EIF2AK3	WNK1	EMC2	VAPA	STX18	ZFYVE27	EMC3	RTN4	RTN3	RTN1	ESYT1	REEP3	TMCC1	WDR83OS	TMEM38B A process that is carried out at the cellular level which results in the assembly	arrangement of constituent parts	or disassembly of the endoplasmic reticulum. [GOC:dph	GOC:jl	GOC:mah] http://amigo.geneontology.org/amigo/term/GO:0007029 2025.1.Hs down
GOBP_IMMUNOGLOBULIN_PRODUCTION GO:0002377 M12930 40 -0.42879939475543644 -1.3990458465081492 0.05893909626719057 0.749066924066924 GALNT2	MLH1	PHB2	GPI	YY1	TFRC	IL27RA	HMCES	TP53BP1	TGFB1	SAMHD1 The appearance of immunoglobulin due to biosynthesis or secretion following a cellular stimulus	resulting in an increase in its intracellular or extracellular levels. [GOC:add	ISBN:0781735149] http://amigo.geneontology.org/amigo/term/GO:0002377 2025.1.Hs down
GOBP_POSITIVE_REGULATION_OF_VASCULATURE_DEVELOPMENT GO:1904018 M11039 57 -0.4005362625369043 -1.394980283231092 0.06042884990253411 0.749066924066924 WARS2	VASH2	HIF1A	HSPB1	THBS1	JAK1	TGM2	TERT	WNK1	ITGA5	HIPK2	SMAD1	VEGFC	ANGPTL4	TGFB1	PRKCA	JUP	HIPK1	RUNX1	TGFBR1	TJP1	GRN	STAT3 Any process that activates or increases the frequency	rate or extent of vasculature development. [GO_REF:0000058	GOC:TermGenie	PMID:21472453] http://amigo.geneontology.org/amigo/term/GO:1904018 2025.1.Hs down
GOBP_REGULATION_OF_RESPONSE_TO_WOUNDING GO:1903034 M13178 53 0.3992051379640885 1.3863730224176878 0.05918367346938776 0.749066924066924 PTPRF	PTK2	FERMT2	EXTL3	CADM4	CLASP1	TMX1	RREB1 Any process that modulates the frequency	rate or extent of response to wounding. [GO_REF:0000058	GOC:kmv	GOC:TermGenie	PMID:19164535] http://amigo.geneontology.org/amigo/term/GO:1903034 2025.1.Hs up
GOBP_LEARNING GO:0007612 M13048 49 -0.40733055817721303 -1.3816576021823592 0.058365758754863814 0.749066924066924 CREB1	HIF1A	PPT1	PPP3CB	VDAC1	EIF4A3	LGMN	APP	VDAC3	PTN	BRAF	PRKAR2B Any process in an organism in which a relatively long-lasting adaptive behavioral change occurs as the result of experience. [ISBN:0582227089	ISBN:0721662544] http://amigo.geneontology.org/amigo/term/GO:0007612 2025.1.Hs down
GOBP_TOR_SIGNALING GO:0031929 M14826 86 -0.35335081440291805 -1.3400620232461025 0.061420345489443376 0.749066924066924 RPS6	RPS6KA2	DDIT4	HIF1A	FBXO9	USP7	ITFG2	ATM	SYAP1	YWHAZ	EIF4EBP2	GPR137B	SEC13	FAM83D	SIK3	PREX1	EP300	NLK	AKT1S1	EPM2A	RPS6KA1	HDAC3	EIF4EBP1	PINK1	OTUD5	GOLPH3	TSC2	LIPA	RNF152	MFSD8	USP9X	RPS6KB1	SYK	SAR1A	F3 The series of molecular signals mediated by TOR (Target of rapamycin) proteins	members of the phosphoinositide (PI) 3-kinase related kinase (PIKK) family that act as serine/threonine kinases in response to nutrient availability or growth factors. [PMID:12372295] http://amigo.geneontology.org/amigo/term/GO:0031929 2025.1.Hs down
GOBP_CIRCULATORY_SYSTEM_PROCESS GO:0003013 M10531 175 -0.29853494237912825 -1.2647166744630218 0.06149009212269092 0.749066924066924 ATP2B1	SNX5	RPS6KA2	PER2	SLC13A3	NAV2	HSP90AA1	ECE1	EXT1	WWTR1	HTR7	PTPN11	ABCC4	CACNA1C	BCR	YAP1	GPX1	TFRC	ABCC1	YWHAE	APP	SLC7A2	WNK1	LEPR	BBS2	BMPR2	VEGFC	TGFB1	RNLS	JUP	NEDD4L	NUP155	SCARB1	PPARA	TJP1	COL1A2	ATP2B4	SLC2A3	RHOA	ATP2A2	EPAS1	KCNMA1	PIK3CG	SCNN1A	FLI1	RAC1	SLC7A3	ABCC5	ADD3	ATP2A3
GOBP_GENERATION_OF_PRECURSOR_METABOLITES_AND_ENERGY GO:0006091 M1210 165 -0.2991647713866102 -1.252918928109439 0.05555555555555555 0.749066924066924 PHKG1	GAPDH	PER2	COX4I1	DDIT4	HIF1A	TPI1	HK1	PUM2	RBPJ	CS	COX7C	TALDO1	GPI	NDUFB2	APP	ENO1	CHCHD10	ALDOA	COX6C	WIPI1	POR	LEPR	MDH2	VCP	SLC25A13	NDUFS3	LYRM7	PGLS	PPARA	COL6A1	ATG3	STAT3	EP300	RHOA	MFN2	UQCRH	PSEN1	CYC1	EPM2A	NDUFA12	IDH3B	PDIA5	CROT	MDH1	PINK1	NDUFS8	UGP2	GFPT2	ADSL
GOBP_REGULATION_OF_IMMUNE_SYSTEM_PROCESS GO:0002682 M5017 474 -0.2511518161924184 -1.1819270415134464 0.055445544554455446 0.749066924066924 FN1	DNASE1	RPL13A	FBXW7	CREB1	TNFRSF21	GALNT2	SIAE	ARID1B	ACTB	MLH1	PCBP2	HSP90AA1	HIF1A	CNN2	PPT1	HK1	THBS1	PPP3CB	THEMIS2	PUM2	IRAK3	SLAMF6	CD99L2	PTPN11	RPS19	PHB2	MAPKAPK2	PAG1	FBN1	BCR	GPI	PRNP	GPX1	TFRC	ATM	NPLOC4	P4HB	LGMN	STXBP1	YWHAE	TRIM62	APP	IL27RA	PAK2	YWHAZ	CD276	STAT5B	HMCES	LPXN
GOBP_NEGATIVE_REGULATION_OF_FAT_CELL_DIFFERENTIATION GO:0045599 M10687 19 0.5242827768567391 1.4560832910553145 0.06212424849699399 0.7525050100200401 FERMT2	ASXL1	TRIO	AXIN1	SOD2 Any process that stops	prevents	or reduces the frequency	rate or extent of adipocyte differentiation. [GOC:go_curators] http://amigo.geneontology.org/amigo/term/GO:0045599 2025.1.Hs up
GOBP_NEGATIVE_REGULATION_OF_BLOOD_VESSEL_ENDOTHELIAL_CELL_MIGRATION GO:0043537 M10771 16 -0.5661443932357317 -1.4881885324941744 0.06412825651302605 0.760426115388672 THBS1	HDAC5	TGFB1	JUP	ATP2B4	RHOA	MEF2C	ITGB1BP1 Any process that stops	prevents	or reduces the frequency	rate or extent of the migration of the endothelial cells of blood vessels. [GOC:go_curators] http://amigo.geneontology.org/amigo/term/GO:0043537 2025.1.Hs down
GOBP_UROGENITAL_SYSTEM_DEVELOPMENT GO:0001655 M14876 19 0.5239155449992446 1.455063383106313 0.06412825651302605 0.760426115388672 CRIP1	UBE3A	AHI1	SMARCC1	EAF2	PSAP The process whose specific outcome is the progression of the urogenital system over time	from its formation to the mature structure. [GOC:go_curators] http://amigo.geneontology.org/amigo/term/GO:0001655 2025.1.Hs up
GOBP_VISUAL_BEHAVIOR GO:0007632 M15174 18 -0.5350728673235372 -1.4548896855796127 0.06374501992031872 0.760426115388672 CREB1	HIF1A	APP	BRAF	DYNLRB1	NF1 The behavior of an organism in response to a visual stimulus. [GOC:jid	GOC:pr] http://amigo.geneontology.org/amigo/term/GO:0007632 2025.1.Hs down
GOBP_REGULATION_OF_MRNA_SPLICING_VIA_SPLICEOSOME GO:0048024 M14810 45 0.4088424736411237 1.3721746016352652 0.06387225548902195 0.760426115388672 DAZAP1	NUP98	TRA2B	RBM39	DDX5	PTBP1	RBM4	DYRK1A	SRSF4	CELF1	CLNS1A	EXOSC10	RBM23	RNPS1	RBPMS2	KHDRBS1	CIRBP	SRRM1 Any process that modulates the frequency	rate or extent of mRNA splicing via a spliceosomal mechanism. [GOC:jid] http://amigo.geneontology.org/amigo/term/GO:0048024 2025.1.Hs up
GOBP_INSULIN_SECRETION GO:0030073 M10906 54 -0.40379886334639925 -1.3889960888711994 0.06496062992125984 0.7647657841140528 RPH3AL	PER2	STX1A	HIF1A	PPP3CB	PTPN11	ITPR1	SNX19	CPT1A	PRKCA	RFX3	RAC1	IL1RN	GNAI1	PRKCB	DYNLL1	PFKL	RIMS2	ACVR2B	GLUD1	SIRT6	PRKCE	KLF7	RAF1	PSMD9	PICK1	TM7SF3 The regulated release of proinsulin from secretory granules accompanied by cleavage of proinsulin to form mature insulin. In vertebrates	insulin is secreted from B granules in the B cells of the vertebrate pancreas and from insulin-producing cells in insects. [GOC:mah	ISBN:0198506732] http://amigo.geneontology.org/amigo/term/GO:0030073 2025.1.Hs down
GOBP_RNA_EXPORT_FROM_NUCLEUS GO:0006405 M22411 52 0.3961857652824775 1.3699883149885983 0.06517311608961303 0.7647657841140528 NUP214	NUP98	NEAT1	CPSF6	XPO1	RAN	SETD2	NUP188	POM121C	SMG1	HNRNPA2B1	XPO5	NUP107	AKAP8L	UPF2	GLE1 The directed movement of RNA from the nucleus to the cytoplasm. [GOC:ma] http://amigo.geneontology.org/amigo/term/GO:0006405 2025.1.Hs up
GOBP_POSITIVE_REGULATION_OF_TRANSMEMBRANE_TRANSPORT GO:0034764 M11713 56 0.3930928769100606 1.382609238645145 0.06557377049180328 0.7654803363628643 ACTN4	ASPH	CEMIP	FLNA	PTPRM	P2RX1	PPP3CA	ABL1	VMP1	PRKCI	HTT	AKT2	BAX	TRPC1	TMSB4X	STIM1 Any process that activates or increases the frequency	rate or extent of the directed movement of a solute from one side of a membrane to the other. [GOC:mah] http://amigo.geneontology.org/amigo/term/GO:0034764 2025.1.Hs up
GOBP_ORGANELLE_DISASSEMBLY GO:1903008 M16645 26 -0.480004823238911 -1.43132827127492 0.06601941747572816 0.7667100390351317 TCF25	STX5	KIF5B	KLC1	MAP4	MRRF	VCP	KLHDC10	NEMF	GBF1 The disaggregation of an organelle into its constituent components. [GO_REF:0000079	GOC:TermGenie] http://amigo.geneontology.org/amigo/term/GO:1903008 2025.1.Hs down
GOBP_REGULATION_OF_GLIAL_CELL_PROLIFERATION GO:0060251 M12542 16 -0.5637578598230768 -1.4819152006382703 0.06813627254509018 0.7689987269607572 DICER1	CREB1	RNF10	ETV5	VEGFC	NF2 Any process that modulates the frequency	rate or extent of glial cell proliferation. [GOC:dph	GOC:tb] http://amigo.geneontology.org/amigo/term/GO:0060251 2025.1.Hs down
GOBP_T_CELL_LINEAGE_COMMITMENT GO:0002360 M14950 15 -0.5699083832872202 -1.4799421999368452 0.06746031746031746 0.7689987269607572 SLAMF6	JAK1	BRAF	STAT3	EP300	RHOA	BRD4 The process in which a lymphoid progenitor cell becomes committed to becoming any type of T cell. [GOC:add	ISBN:0781735149] http://amigo.geneontology.org/amigo/term/GO:0002360 2025.1.Hs down
GOBP_MONOCYTE_DIFFERENTIATION GO:0030224 M40397 16 0.5500976071663107 1.4658237875501634 0.06759443339960239 0.7689987269607572 MYH9	INPP5D	JUN	FOXP1	FASN	ZBTB46 The process in which a relatively unspecialized myeloid precursor cell acquires the specialized features of a monocyte. [GOC:mah] http://amigo.geneontology.org/amigo/term/GO:0030224 2025.1.Hs up
GOBP_REGULATION_OF_ORGANIC_ACID_TRANSPORT GO:0032890 M10568 21 -0.5162929778692636 -1.4415767876880032 0.06667524532512492 0.7689987269607572 PER2	THBS1	STXBP1	SLC43A1	PLA2G4A	PPARA	PSEN1 Any process that modulates the frequency	rate or extent of the directed movement of organic acids into	out of or within a cell	or between cells	by means of some agent such as a transporter or pore. [GOC:mah] http://amigo.geneontology.org/amigo/term/GO:0032890 2025.1.Hs down
GOBP_NERVE_DEVELOPMENT GO:0021675 M13527 26 -0.47741120867093045 -1.4235943617885702 0.06796116504854369 0.7689987269607572 DICER1	NAV2	ECE1	EXT1 The process whose specific outcome is the progression of a nerve over time	from its formation to the mature structure. [GO_REF:0000021	GOC:cls	GOC:dgh	GOC:dph	GOC:jid] http://amigo.geneontology.org/amigo/term/GO:0021675 2025.1.Hs down
GOBP_MYELOID_LEUKOCYTE_MIGRATION GO:0097529 M10503 54 -0.4005466814426263 -1.3778091630160783 0.068897637795275593 0.7689987269607572 RPL13A	CNN2	THBS1	CD99L2	RPS19	PPIA	BCR	LGMN	APP	STAT5B	VEGFC	PIP5K1C	SPI1	MPP1	PREX1	GBF1	PIK3R1	ANO6	NF1	PIK3CG	RTN4	RAC1 The movement of a myeloid leukocyte within or between different tissues and organs of the body. [GOC:cvs	PMID:22342843	PMID:24157461] http://amigo.geneontology.org/amigo/term/GO:0097529 2025.1.Hs down
GOBP_NEGATIVE_REGULATION_OF_PROTEIN_LOCALIZATION GO:1903828 M11705 80 -0.35984589398344985 -1.335492273805817 0.0684931506849315 0.7689987269607572 BARD1	CHP1	PTPN11	RAB11FIP3	EI24	PPFIA1	APP	RANGAP1	YWHAZ	TMEM59	WNK1	SUFU	FRMD4A	PKDCC	VCP	TGFB1	SPI1	NEDD4L	RAB11FIP1	VPS35	MARK3	NSFL1C	NF1	HDAC3	GNAI1	DNAJA1	SIN3A	MRAP2	COMMD1	ITGB1BP1	LRRK2	ABHD17B	PFKL	ASTN2	LATS1	SIRT6	LYPLA1	UBAC2	KLF7 Any process that stops	prevents or reduces the frequency	rate or extent of a protein localization. [GO_REF:0000058	GOC:TermGenie	GOC:vw] http://amigo.geneontology.org/amigo/term/GO:1903828 2025.1.Hs down
GOBP_POSTSYNAPSE_ORGANIZATION GO:0099173 M24855 99 -0.3311272798353519 -1.2959550095473096 0.06928838951310862 0.7689987269607572 FNTA	ACTB	SIPA1L1	CAPRIN1	SSH1	PUM2	NEDD8	PRNP	LGMN	APP	FARP1	DOCK1	ETV5	ENAH	CRKL	TANC2	GPHN	PDLIM5	STK38	PTPRS	BAIAP2	VPS35	ACTG1	PSEN1	NF1	DLG5	ABI2	RTN4	RAC1	ELMO1	SYNDIG1	ARF4	PPFIA2	EEF2K	ZMYND8	UBE3B A process that is carried out at the cellular level which results in the assembly	arrangement of constituent parts	or disassembly of a postsynapse. [GOC:dos] http://amigo.geneontology.org/amigo/term/GO:0099173 2025.1.Hs down
GOBP_REGULATION_OF_IMMUNE_EFFECTOR_PROCESS GO:0002697 M4850 101 -0.3306513935217804 -1.2928915921704836 0.06928838951310862 0.7689987269607572 DNASE1	GALNT2	MLH1	HK1	PPP3CB	IRAK3	SLAMF6	RPS19	PHB2	MAPKAPK2	BCR	GPI	TFRC	STXBP1	IL27RA	STAT5B	HMCES	TP53BP1	TGFB1	SPI1	GRB2	ICAM1	GRN	EP300	CD226	CD59	BRD4 Any process that modulates the frequency	rate	or extent of an immune effector process. [GOC:add] http://amigo.geneontology.org/amigo/term/GO:0002697 2025.1.Hs down
GOBP_REGULATION_OF_OXIDATIVE_STRESS_INDUCED_INTRINSIC_APOPTOTIC_SIGNALING_PATHWAY GO:1902175 M16761 16 -0.5582775162969746 -1.467509362680465 0.07014028056112225 0.7708587907522362 FBXW7	HIF1A	HSPB1	PPIA	GPX1	P4HB Any process that modulates the frequency	rate or extent of an oxidative stress-induced intrinsic apoptotic signaling pathway. [GOC:BHF	GOC:mtg_apoptosis	GOC:TermGenie	PMID:11672522] http://amigo.geneontology.org/amigo/term/GO:1902175 2025.1.Hs down
GOBP_STEROL_BIOSYNTHETIC_PROCESS GO:0016126 M15206 22 0.4923355752392885 1.4280166179359426 0.07003891050583658 0.7708587907522362 HMGCS1	DHCR24	KPNB1	SCAP	LBR The chemical reactions and pathways resulting in the formation of sterols	steroids with one or more hydroxyl groups and a hydrocarbon side-chain in the molecule. [GOC:go_curators] http://amigo.geneontology.org/amigo/term/GO:0016126 2025.1.Hs up
GOBP_T_HELPER_17_TYPE_IMMUNE_RESPONSE GO:0072538 M24594 17 -0.5412843003168396 -1.4551426259911684 0.07615230460921844 0.7931809565076098 SLAMF6	JAK1	IL27RA	TYK2	STAT3	EP300	BRD4 An immune response which is associated with resistance to intracellular bacteria with a key role in inflammation and tissue injury. This immune response is associated with pathological autoimmune conditions such as multiple sclerosis	arthritis and psoriasis which is typically orchestrated by the production of particular cytokines by T-helper 17 cells	most notably interleukin-17	IL-21 and IL-22. [GOC:BHF	GOC:ebc] http://amigo.geneontology.org/amigo/term/GO:0072538 2025.1.Hs down
GOBP_NADH_METABOLIC_PROCESS GO:0006734 M13933 20 -0.5130338887913577 -1.4165040682035892 0.07459677419354839 0.7931809565076098 TPI1	HK1	GPI	ENO1	MDH2	GOT2	VCP	SLC25A13	ME1 The chemical reactions and pathways involving reduced nicotinamide adenine dinucleotide (NADH)	a coenzyme present in most living cells and derived from the B vitamin nicotinic acid. [GOC:jl	ISBN:0618254153] http://amigo.geneontology.org/amigo/term/GO:0006734 2025.1.Hs down
GOBP_POSITIVE_REGULATION_OF_INSULIN_SECRETION GO:0032024 M12237 26 -0.46723337902006096 -1.3932450515020383 0.07766990291262135 0.7931809565076098 RPH3AL	HIF1A	PPP3CB	ITPR1	PRKCA	RAC1	PRKCB	DYNLL1	GLUD1	SIRT6	PRKCE	PSMD9	TM7SF3 Any process that activates or increases the frequency	rate or extent of the regulated release of insulin. [GOC:mah] http://amigo.geneontology.org/amigo/term/GO:0032024 2025.1.Hs down
GOBP_POSITIVE_REGULATION_OF_PEPTIDE_SECRETION GO:0002793 M15157 29 -0.45407693820638484 -1.3685183774577543 0.07569721115537849 0.7931809565076098 RPH3AL	HIF1A	PPP3CB	ITPR1	PRKCA	RAC1	PRKCB	DYNLL1	GLUD1	SIRT6	PRKCE	PSMD9	TM7SF3 Any process that activates or increases the frequency	rate	or extent of peptide secretion. [GOC:add] http://amigo.geneontology.org/amigo/term/GO:0002793 2025.1.Hs down
GOBP_NEGATIVE_REGULATION_OF_ESTABLISHMENT_OF_PROTEIN_LOCALIZATION GO:1904950 M13086 42 -0.4145028431076865 -1.366284995617453 0.07524752475247524 0.7931809565076098 BARD1	CHP1	PTPN11	RAB11FIP3	EI24	RANGAP1	SUFU	FRMD4A	PKDCC	RAB11FIP1	NF1	HDAC3	GNAI1	DNAJA1	ITGB1BP1	LRRK2	PFKL	SIRT6	LYPLA1	UBAC2	KLF7 Any process that stops	prevents or reduces the frequency	rate or extent of establishment of protein localization. [GO_REF:0000058	GOC:TermGenie	PMID:22761445] http://amigo.geneontology.org/amigo/term/GO:1904950 2025.1.Hs down
GOBP_REGULATION_OF_CELL_SHAPE GO:0008360 M16874 61 0.3815910912612632 1.3624848115891723 0.07261410788381743 0.7931809565076098 PTK2	DLG1	FERMT2	MYH9	GAS2	CCL24	PLXND1	BVES	ITGB2	FMNL2	DNMBP Any process that modulates the surface configuration of a cell. [GOC:dph	GOC:go_curators	GOC:tb] http://amigo.geneontology.org/amigo/term/GO:0008360 2025.1.Hs up
GOBP_SPERMATID_DIFFERENTIATION GO:0048515 M6833 62 0.3786287347833135 1.3607776468087498 0.07453416149068323 0.7931809565076098 CDYL	POC1B	RHBDD1	FXR1	CFAP44	RAN	ABHD2	SMARCA2	AFF4	SBF1	BAX	VPS13B	TTLL5	NUP210L	DMC1	TTLL1 The process whose specific outcome is the progression of a spermatid over time	from initial commitment of the cell to a specific fate	to the fully functional differentiated cell. [GOC:dph	GOC:jid] http://amigo.geneontology.org/amigo/term/GO:0048515 2025.1.Hs up
GOBP_LYTIC_VACUOLE_ORGANIZATION GO:0080171 M14989 51 -0.3974523622824355 -1.3497217778326225 0.07495069033530571 0.7931809565076098 PPT1	PPP3CB	CLVS1	CHMP4A	CHMP5	TMEM165	HPS4	ATP6V0B	RAB7A	TMEM63A	GRN	NAGPA	ARL8B	VPS35	CHMP3	AP3B1	VPS33B	LIPA	VPS33A	MFSD8	LRRK2 A process that is carried out at the cellular level which results in the assembly	arrangement of constituent parts	or disassembly of a lytic vacuole. [PMID:20729380] http://amigo.geneontology.org/amigo/term/GO:0080171 2025.1.Hs down
GOBP_REGULATION_OF_CELL_MATRIX_ADHESION GO:0001952 M15173 57 0.37969320509386756 1.3405275338783031 0.077709611451942745 0.7931809565076098 PLEKHA2	PTK2	FERMT2	CORO1C	CLASP1	DUSP3	DUSP22	SDC4	ABL1	GSK3B Any process that modulates the frequency	rate or extent of attachment of a cell to the extracellular matrix. [GOC:hjd] http://amigo.geneontology.org/amigo/term/GO:0001952 2025.1.Hs up
GOBP_REGULATORY_NCRNA_MEDIATED_GENE_SILENCING GO:0031047 M42718 71 0.3592522301375265 1.3198309449642407 0.07789473684210527 0.7931809565076098 MALAT1	CNOT6L	NEAT1	CNOT1	CNOT10	FXR1	TNRC6B	CNOT2	CNOT6	EIF6	DDX5	RAN	RBM4	WTIP	DROSHA	CNOT11	DGCR8	HNRNPA2B1	XPO5	CELF1	ZC3H7B	MIR520H	AGO3	EZH2	AGO2	TNRC6A A process in which an regulatory non-coding RNA molecule reduces expression of target genes. This can occur pre-transcriptionally by assembly of heterochromatin and prevention of transcription or co- or post-transcriptionally by targeting RNAs for degradation or by interfering with splicing or translation. This process starts once the inhibitory RNA molecule has been transcribed	and includes processing of the RNA such as cleavage	modifications	transport from the nucleus to the cytoplasm	loading onto the RISC complex	and the effect on transcription or translation. [PMID:15020054] http://amigo.geneontology.org/amigo/term/GO:0031047 2025.1.Hs up
GOBP_CONNECTIVE_TISSUE_DEVELOPMENT GO:0061448 M15014 103 -0.32871591450160426 -1.2905653890062487 0.07303370786516854 0.7931809565076098 TIMP1	CD44	CSGALNACT1	EFEMP1	HIF1A	EXT1	PUM2	PTPN11	AXIN2	RUNX2	LTBP3	FTO	NCOA2	EIF2AK3	POR	SNX19	BBS2	SMAD1	ZBTB16	BMPR2	PKDCC	TGFB1	SPI1	BGN	RUNX1	TGFBR1 The progression of a connective tissue over time	from its formation to the mature structure. [GOC:BHF] http://amigo.geneontology.org/amigo/term/GO:0061448 2025.1.Hs down
GOBP_VIRAL_PROCESS GO:0016032 M42681 154 -0.29614457003762673 -1.2337899909143788 0.075 0.7931809565076098 EEF1A1	MX1	UVRAG	EIF3F	PABPC1	PCBP2	VAPB	EIF3L	PPIA	EIF3D	CHMP4A	CHMP5	TFRC	ITGB5	P4HB	TRIM62	NUP153	ITGA5	EDEM2	HSP90AB1	EPS15	VCP	CBL	ZDHHC20	VAPA	RAB7A	KIAA0319L	SLC20A2	MVB12B	SCARB1	ICAM1	EP300	ARL8B	ADAR	PDCD6IP	ITCH	CHMP3	EIF3A	BRD4	NFIA A multi-organism process in which a virus is a participant. The other participant is the host. Includes infection of a host cell	replication of the viral genome	and assembly of progeny virus particles. In some cases the viral genetic material may integrate into the host genome and only subsequently	under particular circumstances	'complete' its life cycle. [GOC:bf	GOC:jl	GOC:mah] http://amigo.geneontology.org/amigo/term/GO:0016032 2025.1.Hs down
GOBP_APOPTOTIC_SIGNALING_PATHWAY GO:0097190 M12660 215 -0.283237888097357 -1.2325457486148836 0.074 0.7931809565076098 TPT1	HIP1	FBXW7	CD44	MLH1	CREB3L1	DDIT4	HIF1A	ANXA6	HSPB1	THBS1	PPIA	EI24	RPS27L	BNIP3L	ZMYND11	VDAC2	YAP1	GPX1	ATM	P4HB	EYA3	APP	SERINC3	ENO1	CHCHD10	TERT	PAK2	GSTP1	EIF2AK3	ITPR1	ERCC2	RPS3	HIPK2	TP53BP1	TGFB1	PRKCA	GNAI2	HIPK1	SPI1	EEF1E1	TGFBR1	FASTK	ICAM1	ZDHHC3	BRCA2	IFI6	EP300	FAF1	GABARAP
GOBP_POSITIVE_REGULATION_OF_LOCOMOTION GO:0040017 M40427 204 0.2830470453419908 1.224759132842398 0.0781563126252505 0.7931809565076098 MALAT1	ACTN4	PTK2	FERMT2	ZNF609	ETS1	CCL24	CEMIP	BVES	CLASP1	FLNA	SEMA5A	AKT3	PODXL	ABL2	SMURF2	CALR	MMP9	MET	RREB1	PPP3CA	DOCK7	JUN	ELP3	SLIT2	RRAS2	FGFR1	ABL1	SOD2	SH3RF2	ARHGEF2	RICTOR	AKT2	HDAC9	FOXP1	SEMA6A	SEMA4B Any process that activates or increases the frequency	rate or extent of locomotion of a cell or organism. [GOC:go_curators] http://amigo.geneontology.org/amigo/term/GO:0040017 2025.1.Hs up
GOBP_RESPONSE_TO_PEPTIDE_HORMONE GO:0043434 M23605 168 -0.29049963547785956 -1.2180598436089487 0.07736943907156674 0.7931809565076098 TIMP1	ATP2B1	RPS6	CREB1	SNX5	HDAC5	PTPN11	JAK1	TCF12	FBN1	RAB31	NUDC	SYAP1	NCOA2	RANGAP1	USO1	GSTP1	AP3S1	STAT5B	POR	NFKB1	LPIN2	EIF4EBP2	TGFB1	PRKCA	TYK2	EIF2B3	GRB2	PPARA	INPPL1	COL6A1	CAD	TFF1	STAT3	NDEL1	BAIAP2	PIP4K2A	CYC1	DDR2	PIK3R1	SCNN1A	VPS13C	NONO	RAC1	GRB10	GNAI1	PRKCB	KANK1	MYO5A	IGFBP5
GOBP_CELL_SURFACE_RECEPTOR_PROTEIN_TYROSINE_KINASE_SIGNALING_PATHWAY GO:0007169 M17660 241 -0.27592048659411744 -1.2098521811362428 0.07630522088353414 0.7931809565076098 HIP1	FBXW7	SNX5	CREB3L1	DDIT4	EFEMP1	HIF1A	SIPA1L1	CAMLG	HSPB1	THBS1	EXT1	SLC31A1	RBPJ	PTPN11	JAK1	MAPKAPK2	DDR1	NPTN	IGFBP4	SHC3	LGMN	REPS2	RUNX2	PAK2	EIF2AK3	AP3S1	STAT5B	RAPGEF1	ERCC2	ITGA5	MAP2K2	EIF4EBP2	VEGFC	CBL	CYFIP1	CRKL	TGFB1	BRAF	TYK2	RAB7A	GRB2	MVB12B	INPPL1	COL6A1	KIF16B	STAT3	IFI6	NDEL1	BAIAP2
GOBP_CELL_PROJECTION_MORPHOGENESIS GO:0048858 M48474 271 -0.2687427335456102 -1.2003653789429072 0.07751937984496124 0.7931809565076098 FN1	DICER1	SEMA4G	CREB1	CD44	ACTB	NCKAP1	SIPA1L1	CUX1	CAPRIN1	ECE1	PITPNA	PPP3CB	EXT1	PTPN11	ROBO2	DDR1	CNP	SEMA3C	NOTCH3	NPTN	KIF5B	KIF20B	STXBP1	APP	CPNE1	APLP2	VCL	PAK2	SLIT3	PTN	FARP1	UST	MAP2K2	BMPR2	ENAH	CYFIP1	PALLD	PRKCA	NTN4	TANC2	MARK2	UNC5D	BRAF	PDLIM5	TIAM2	NEDD4L	ULK2	LIMK1	PTPRS
GOBP_SEGMENTATION GO:0035282 M13563 27 -0.46371184229950635 -1.3856146679395642 0.07874015748031496 0.7955227569647964 NCKAP1	RBPJ	MLLT3	SEMA3C	AXIN2	ATM The regionalization process that divides an organism or part of an organism into a series of semi-repetitive parts	or segments	often arranged along a longitudinal axis. [PMID:10611687	PMID:9706689] http://amigo.geneontology.org/amigo/term/GO:0035282 2025.1.Hs down
GOBP_FEMALE_SEX_DIFFERENTIATION GO:0046660 M13728 41 0.40651110959944314 1.334384280445346 0.07942973523421588 0.7989071137620016 GAS2	NRIP1	UBE3A	TIPARP	SLIT2	FANCA	AXL	ZFY	BAX	NUP107	CTNNA1	CHD7	DMC1	FOXO3 The establishment of the sex of a female organism by physical differentiation. [GOC:bf] http://amigo.geneontology.org/amigo/term/GO:0046660 2025.1.Hs up
GOBP_REGULATION_OF_MULTICELLULAR_ORGANISM_GROWTH GO:0040014 M12396 22 -0.49657709186703025 -1.3924095997535086 0.07991803278688525 0.7992533342342875 CREB1	LGMN	APP	FTO	STAT5B	BBS2 Any process that modulates the frequency	rate or extent of growth of the body of an organism so that it reaches its usual body size. [GOC:dph	GOC:ems	GOC:tb] http://amigo.geneontology.org/amigo/term/GO:0040014 2025.1.Hs down
GOBP_REGULATION_OF_DOUBLE_STRAND_BREAK_REPAIR_VIA_HOMOLOGOUS_RECOMBINATION GO:0010569 M11429 35 0.4307705306609082 1.366947571363673 0.08041237113402062 0.7992533342342875 CREBBP	ACTR2	ERCC6	SPIDR	HELQ	SETD2	ABL1	KDM1A	RTEL1	MBTD1 Any process that modulates the frequency	rate or extent of the error-free repair of a double-strand break in DNA in which the broken DNA molecule is repaired using homologous sequences. [GOC:dph	GOC:jp	GOC:tb] http://amigo.geneontology.org/amigo/term/GO:0010569 2025.1.Hs up
GOBP_REGULATION_OF_INTRACELLULAR_PROTEIN_TRANSPORT GO:0033157 M13668 65 -0.3710677482554707 -1.3254211187127953 0.08123791102514506 0.7992533342342875 RBM22	BARD1	HSP90AA1	CHP1	PTPN11	UBR5	EI24	KIF20B	YWHAE	RANGAP1	EDEM2	SUFU	TGFB1	JUP	TM9SF4	NDEL1	EP300	EDEM1	PSEN1	EPM2A	PIK3R1	NF1	HDAC3	PTPN14	PCNT	GLI3 Any process that modulates the frequency	rate or extent of the directed movement of proteins within cells. [GOC:mah] http://amigo.geneontology.org/amigo/term/GO:0033157 2025.1.Hs down
GOBP_NUCLEUS_ORGANIZATION GO:0006997 M13020 70 0.35800606101947596 1.3104011610164827 0.08085106382978724 0.7992533342342875 ETS1	NUP98	NEAT1	PLEC	ATXN7	FXR1	CFAP44	NOLC1	LMNB1	HABP4	LPIN1	NUP54	SUN1	NUP107	DDX11	AKAP8L A process that is carried out at the cellular level which results in the assembly	arrangement of constituent parts	or disassembly of the nucleus. [GOC:dph	GOC:ems	GOC:jl	GOC:mah] http://amigo.geneontology.org/amigo/term/GO:0006997 2025.1.Hs up
GOBP_POSITIVE_REGULATION_OF_DEVELOPMENTAL_PROCESS GO:0051094 M15406 458 -0.24593973654491863 -1.1523923194938683 0.08113590263691683 0.7992533342342875 FN1	DICER1	WARS2	ATP2B1	VASH2	CREB1	ARID1B	ACTB	MLH1	HIF1A	CUX1	LAMC1	HSPB1	SAP130	CAPRIN1	THBS1	PUM2	WWTR1	RBPJ	ROBO2	JAK1	TGFB1I1	WDFY2	TCF12	MMD	LAMB1	NPTN	AXIN2	YAP1	TFRC	SUCO	NAP1L1	TGM2	ADAM9	APP	SYAP1	CPNE1	RUNX2	OVOL2	TERT	LTBP3	NCOA2	EHD2	STAT5B	HMCES	POR	ZHX3	PTN	WNK1	ITGA5
GOBP_MRNA_3_END_PROCESSING GO:0031124 M13204 17 -0.5318592902879168 -1.4298052315102054 0.0841683366733467 0.8004379590333895 CPSF2	BARD1	RPRD1B	CSTF3	SLBP Any process involved in forming the mature 3' end of an mRNA molecule. [GOC:mah] http://amigo.geneontology.org/amigo/term/GO:0031124 2025.1.Hs down
GOBP_VIRION_ASSEMBLY GO:0019068 M14097 15 -0.5498690268864267 -1.4279038547101137 0.0873015873015873 0.8004379590333895 CHMP4A	CHMP5	MVB12B	PDCD6IP	CHMP3	PC	VPS37A A late phase of the viral life cycle during which all the components necessary for the formation of a mature virion collect at a particular site in the cell and the basic structure of the virus particle is formed. [ISBN:0121585336] http://amigo.geneontology.org/amigo/term/GO:0019068 2025.1.Hs down
GOBP_HOMOLOGOUS_CHROMOSOME_SEGREGATION GO:0045143 M14947 18 -0.5245015988767773 -1.4261458819485 0.08764940239043825 0.8004379590333895 ESPL1	MLH1	ATM The cell cycle process in which replicated homologous chromosomes are organized and then physically separated and apportioned to two sets during the first division of the meiotic cell cycle. Each replicated chromosome	composed of two sister chromatids	aligns at the cell equator	paired with its homologous partner; this pairing off	referred to as synapsis	permits genetic recombination. One homolog (both sister chromatids) of each morphologic type goes into each of the resulting chromosome sets. [GOC:ai	ISBN:0815316194] http://amigo.geneontology.org/amigo/term/GO:0045143 2025.1.Hs down
GOBP_NEGATIVE_REGULATION_OF_NUCLEOCYTOPLASMIC_TRANSPORT GO:0046823 M13384 15 -0.5480323470555605 -1.423134351279065 0.08928571428571429 0.8004379590333895 BARD1	CHP1	EI24	NUP153	RANGAP1	SUFU Any process that stops	prevents	or reduces the frequency	rate or extent of the directed movement of substances between the cytoplasm and the nucleus. [GOC:bf] http://amigo.geneontology.org/amigo/term/GO:0046823 2025.1.Hs down
GOBP_REGULATION_OF_SYSTEMIC_ARTERIAL_BLOOD_PRESSURE GO:0003073 M11135 17 -0.5289577110651764 -1.4220048729791555 0.09018036072144289 0.8004379590333895 RPS6KA2	NAV2	ECE1	WNK1	BMPR2 The process that modulates the force with which blood travels through the systemic arterial circulatory system. The process is controlled by a balance of processes that increase pressure and decrease pressure. [GOC:mtg_cardio] http://amigo.geneontology.org/amigo/term/GO:0003073 2025.1.Hs down
GOBP_PROTEIN_INSERTION_INTO_MEMBRANE GO:0051205 M16160 16 -0.5368887475087595 -1.4112860372972222 0.09018036072144289 0.8004379590333895 NOMO1	CAMLG	EMC1	NOMO3	WNK1	EMC2 The process that results in the incorporation of a protein into a biological membrane. Incorporation in this context means having some part or covalently attached group that is inserted into the the hydrophobic region of one or both bilayers. [GOC:ai] http://amigo.geneontology.org/amigo/term/GO:0051205 2025.1.Hs down
GOBP_MITOCHONDRIAL_GENOME_MAINTENANCE GO:0000002 M15237 16 0.5283123556518666 1.407773471621447 0.09741550695825049 0.8004379590333895 AKT3	SESN2	SLC25A36	NEURL4	DNA2	LIG3	TOP3A	PIF1	MEF2A The maintenance of the structure and integrity of the mitochondrial genome; includes replication and segregation of the mitochondrial chromosome. [GOC:ai	GOC:vw] http://amigo.geneontology.org/amigo/term/GO:0000002 2025.1.Hs up
GOBP_POSITIVE_REGULATION_OF_VIRAL_GENOME_REPLICATION GO:0045070 M11124 15 -0.54009999158314 -1.4025355533796164 0.10714285714285714 0.8004379590333895 PABPC1	VAPB	PPIA Any process that activates or increases the frequency	rate or extent of viral genome replication. [GOC:ai] http://amigo.geneontology.org/amigo/term/GO:0045070 2025.1.Hs down
GOBP_NEGATIVE_REGULATION_OF_PROTEASOMAL_UBIQUITIN_DEPENDENT_PROTEIN_CATABOLIC_PROCESS GO:0032435 M23086 17 -0.5177585382812935 -1.3918979704066456 0.10220440881763528 0.8004379590333895 RPL11	CAMLG	USP7	HSP90AB1	EIF3H Any process that stops	prevents	or reduces the frequency	rate or extent of the breakdown of a protein or peptide by hydrolysis of its peptide bonds	initiated by the covalent attachment of ubiquitin	and mediated by the proteasome. [GOC:mah] http://amigo.geneontology.org/amigo/term/GO:0032435 2025.1.Hs down
GOBP_MESENCHYMAL_CELL_MIGRATION GO:0090497 M45210 18 -0.5112098428099334 -1.3900049374419672 0.099601593625498 0.8004379590333895 FN1	SEMA4G	HIF1A	SEMA3C	OVOL2 The orderly movement of a mesenchymal cell from one site to another	often during the development of a multicellular organism. [GOC:dph	GOC:tb] http://amigo.geneontology.org/amigo/term/GO:0090497 2025.1.Hs down
GOBP_COPII_COATED_VESICLE_BUDDING GO:0090114 M24666 19 -0.5043145389901257 -1.3887054820411509 0.09741550695825049 0.8004379590333895 VAPB	SEC23A	TRAPPC4	SEC24A	SEC13	VAPA	TFG	PREB The evagination of an endoplasmic reticulum membrane	resulting in formation of a COPII-coated vesicle. [GOC:ascb_2009	GOC:dph	GOC:tb] http://amigo.geneontology.org/amigo/term/GO:0090114 2025.1.Hs down
GOBP_MITOCHONDRIAL_FISSION GO:0000266 M12786 23 0.47887688905267034 1.3867879935997598 0.09054325955734406 0.8004379590333895 PGAM5	MTCH2	TMEM135	UCP2	SPIRE1	MYO19	AURKA The division of a mitochondrion within a cell to form two or more separate mitochondrial compartments. [PMID:11038192] http://amigo.geneontology.org/amigo/term/GO:0000266 2025.1.Hs up
GOBP_NEUROTROPHIN_SIGNALING_PATHWAY GO:0038179 M16665 19 -0.5018008030494014 -1.381783534305363 0.10139165009940358 0.8004379590333895 DDIT4	PTPN11	RAPGEF1	CYFIP1	ZFYVE27	AKT1S1	DOCK3 The series of molecular signals initiated by neurotrophin binding to its receptor on the surface of a target cell	and ending with the regulation of a downstream cellular process	e.g. transcription. Neurotrophins are a family of secreted growth factors that induce the survival	development	and function of neurons. [GOC:bf	GOC:jc	GOC:signaling	PMID:17466268	Wikipedia:Neurotrophin] http://amigo.geneontology.org/amigo/term/GO:0038179 2025.1.Hs down
GOBP_ANTEROGRADE_AXONAL_TRANSPORT GO:0008089 M29064 19 -0.5000614414673903 -1.3769939421412594 0.10536779324055666 0.8004379590333895 HSPB1	KIF5B	AP3S1	ARL8B	AP3D1	AP3B1	DLG2	KIF1B	KIF4A	SPG7 The directed movement of organelles or molecules along microtubules from the cell body toward the cell periphery in nerve cell axons. [ISBN:0815316194] http://amigo.geneontology.org/amigo/term/GO:0008089 2025.1.Hs down
GOBP_MODULATION_BY_HOST_OF_VIRAL_PROCESS GO:0044788 M11671 23 -0.47728135265836424 -1.376454013273107 0.09306930693069307 0.8004379590333895 EEF1A1	VAPB	ZDHHC20	VAPA	PI4KA	PAIP1	RAB5A	PC	EIF2AK4	IFI27	PSMC3	TMEM41B A process in which a host organism modulates the frequency	rate or extent of any of a process being mediated by a virus with which it is infected. [GOC:jl] http://amigo.geneontology.org/amigo/term/GO:0044788 2025.1.Hs down
GOBP_NON_MOTILE_CILIUM_ASSEMBLY GO:1905515 M25360 25 -0.46786087395991444 -1.3738940814252139 0.08946322067594434 0.8004379590333895 CEP250	DYNC2H1	CEP135	BBS2	MAP4	IFT172	IFT122	C2CD3	TTC8	IFT88	CEP350	CEP89	BBS1	CEP290 The aggregation	arrangement and bonding together of a set of components to form a non-motile cilium. [GO_REF:0000079	GOC:cilia	GOC:kmv	GOC:TermGenie	PMID:14521833	PMID:14521834] http://amigo.geneontology.org/amigo/term/GO:1905515 2025.1.Hs down
GOBP_ACYL_COA_METABOLIC_PROCESS GO:0006637 M48369 33 0.43809284290617145 1.3737245590233647 0.08964143426294821 0.8004379590333895 HMGCS1	SUCLG2	PDHX	PDK1	ACSF3	FASN	DLST	OGDH	ACACA	DLAT	PDK3	HACD1	ACSL3	ELOVL5	MVK	MLYCD The chemical reactions and pathways involving acyl-CoA	any derivative of coenzyme A in which the sulfhydryl group is in thiolester linkage with an acyl group. [ISBN:0198506732] http://amigo.geneontology.org/amigo/term/GO:0006637 2025.1.Hs up
GOBP_MECHANORECEPTOR_DIFFERENTIATION GO:0042490 M14332 23 0.47376794721678955 1.3719929192080622 0.10261569416498995 0.8004379590333895 SCRIB	GABRB3	ATP8B1	SLC4A7	SDC4	FGFR1	DIAPH3	WDPCP The process in which a relatively unspecialized cell acquires specialized features of a mechanoreceptor	a cell specialized to transduce mechanical stimuli and relay that information centrally in the nervous system. [CL:0000199	GOC:jl] http://amigo.geneontology.org/amigo/term/GO:0042490 2025.1.Hs up
GOBP_EPIBOLY GO:0090504 M13804 22 0.470783152854957 1.365503935795024 0.10894941634241245 0.8004379590333895 COL5A1	FERMT2	CLASP1	FLNA	RREB1 The expansion of one cell sheet over other cells or yolk. [GOC:dph	GOC:tb] http://amigo.geneontology.org/amigo/term/GO:0090504 2025.1.Hs up
GOBP_CELL_KILLING GO:0001906 M15770 34 -0.43577841302028497 -1.3654489017543148 0.08582834331337326 0.8004379590333895 DNASE1	GAPDH	PPP3CB	SLAMF6	RPS19	KIF5B	STAT5B	TGFB1	SPI1	GRB2	ICAM1	PLEKHM2	ARL8B	CD226	PIK3R1	CD59 Any process in an organism that results in the killing of its own cells or those of another organism	including in some cases the death of the other organism. Killing here refers to the induction of death in one cell by another cell	not cell-autonomous death due to internal or other environmental conditions. [GOC:add] http://amigo.geneontology.org/amigo/term/GO:0001906 2025.1.Hs down
GOBP_NEGATIVE_REGULATION_OF_MUSCLE_CELL_APOPTOTIC_PROCESS GO:0010656 M12233 16 0.5123832406497434 1.3653277758384523 0.10536779324055666 0.8004379590333895 HSPB6	CFLAR Any process that decreases the rate or frequency of muscle cell apoptotic process	a form of programmed cell death induced by external or internal signals that trigger the activity of proteolytic caspases whose actions dismantle a muscle cell and result in its death. [GOC:dph	GOC:mtg_apoptosis	GOC:tb] http://amigo.geneontology.org/amigo/term/GO:0010656 2025.1.Hs up
GOBP_RENAL_TUBULE_MORPHOGENESIS GO:0061333 M49504 24 0.47045714200198485 1.364259466681381 0.10526315789473684 0.8004379590333895 DLG1	C1orf54	HS3ST3A1	AHI1	KLHL3	MTSS1	GREB1L	LAMA5 The process in which the renal tubule is generated by specification of cell fate	through the maintenance of cell polarity	regulated cell proliferation and morphogenetic cell rearrangements	shape changes and growth. A renal tubule is a tube that filters	re-absorbs and secretes substances to rid an organism of waste and to play a role in fluid homeostasis. [GOC:dph	GOC:mtg_kidney_jan10] http://amigo.geneontology.org/amigo/term/GO:0061333 2025.1.Hs up
GOBP_REGULATION_OF_VIRAL_GENOME_REPLICATION GO:0045069 M15836 30 -0.4465348127887102 -1.3592837675512115 0.08582834331337326 0.8004379590333895 MX1	PABPC1	VAPB	PPIA Any process that modulates the frequency	rate or extent of viral genome replication. [GOC:ai] http://amigo.geneontology.org/amigo/term/GO:0045069 2025.1.Hs down
GOBP_POSITIVE_REGULATION_OF_MACROAUTOPHAGY GO:0016239 M22818 35 -0.4261441291497515 -1.3554700169781828 0.09284332688588008 0.8004379590333895 UVRAG	HIF1A	VDAC1	BNIP3L	HUWE1	EIF2AK1	WIPI1	AMBRA1	VPS13D	PIP4K2A	EPM2A Any process	such as recognition of nutrient depletion	that activates or increases the rate of macroautophagy to bring cytosolic macromolecules to the vacuole/lysosome for degradation. [GOC:go_curators	PMID:9412464] http://amigo.geneontology.org/amigo/term/GO:0016239 2025.1.Hs down
GOBP_CELLULAR_RESPONSE_TO_XENOBIOTIC_STIMULUS GO:0071466 M42919 43 -0.40925270250011286 -1.351399925631722 0.08582834331337326 0.8004379590333895 RBM22	ABCC4	PRNP	TFRC	ABCC1	GSTP1	POR	CYP2S1	SUFU	CRKL	BRAF Any process that results in a change in state or activity of a cell (in terms of movement	secretion	enzyme production	gene expression	etc.) as a result of a stimulus from a xenobiotic	a compound foreign to the organism exposed to it. It may be synthesized by another organism (like ampicilin) or it can be a synthetic chemical. [GOC:krc	GOC:mah] http://amigo.geneontology.org/amigo/term/GO:0071466 2025.1.Hs down
GOBP_INNER_EAR_MORPHOGENESIS GO:0042472 M16847 29 0.4435554125746846 1.350143301684789 0.098 0.8004379590333895 PRRX1	ZEB1	SCRIB	FGFR1	TTC39C	WDPCP	CHD7	NR4A3 The process in which the anatomical structures of the inner ear are generated and organized. The inner ear is the structure in vertebrates that contains the organs of balance and hearing. It consists of soft hollow sensory structures (the membranous labyrinth) containing fluid (endolymph) surrounded by fluid (perilymph) and encased in a bony cavity (the bony labyrinth). It consists of two c…	the sacculus and utriculus	from which arise the cochlea and semicircular canals respectively. [GOC:jl	ISBN:0192801023] http://amigo.geneontology.org/amigo/term/GO:0042472 2025.1.Hs up
GOBP_LAMELLIPODIUM_ASSEMBLY GO:0030032 M16776 34 -0.4301073034474145 -1.3476792965911422 0.09381237524950099 0.8004379590333895 ABLIM3	NCKAP1	HSP90AA1	VCL	ACTR3	CYFIP1	CAPZB	SRGAP2	PIK3R1	ABI2	RAC1	SPATA13	GOLPH3 Formation of a lamellipodium	a thin sheetlike extension of the surface of a migrating cell. [GOC:mah	ISBN:0815316194] http://amigo.geneontology.org/amigo/term/GO:0030032 2025.1.Hs down
GOBP_NEURAL_CREST_CELL_DIFFERENTIATION GO:0014033 M16602 30 -0.44073444788248395 -1.3416270437368518 0.09381237524950099 0.8004379590333895 FN1	SEMA4G	HIF1A	EXT1	SEMA3C	OVOL2 The process in which a relatively unspecialized cell acquires specialized features of a neural crest cell. [GOC:dh	GOC:ef] http://amigo.geneontology.org/amigo/term/GO:0014033 2025.1.Hs down
GOBP_REGULATION_OF_VIRAL_LIFE_CYCLE GO:1903900 M49639 41 -0.40714522714245804 -1.3396558008232289 0.09393346379647749 0.8004379590333895 MX1	PABPC1	VAPB	PPIA	P4HB	TRIM62 Any process that modulates the frequency	rate or extent of viral life cycle. [GO_REF:0000058	GOC:TermGenie	PMID:18005716] http://amigo.geneontology.org/amigo/term/GO:1903900 2025.1.Hs down
GOBP_CRANIAL_SKELETAL_SYSTEM_DEVELOPMENT GO:1904888 M13822 27 -0.4475647018446283 -1.337365491147766 0.10433070866141732 0.8004379590333895 EXT1	PAX5	EIF4A3	RUNX2	MTHFD1L	CRKL	TGFB1	WDR19	TGFBR1 The process whose specific outcome is the progression of a cranial skeletal system over time	from its formation to the mature structure. The cranial skeletal system is the skeletal subdivision of the head	and includes the skull (cranium plus mandible)	pharyngeal and/or hyoid apparatus. [GO_REF:0000094	GOC:bf	GOC:PARL	GOC:TermGenie	PMID:11262227] http://amigo.geneontology.org/amigo/term/GO:1904888 2025.1.Hs down
GOBP_CELLULAR_RESPONSE_TO_IONIZING_RADIATION GO:0071479 M14071 31 -0.4357617049161353 -1.3357995298027812 0.10483870967741936 0.8004379590333895 BARD1	CCND2	YAP1	ATM	SWI5	TP53BP1	TGFB1	GRB2	BRCA2	BRCC3	TANK Any process that results in a change in state or activity of a cell (in terms of movement	secretion	enzyme production	gene expression	etc.) as a result of a ionizing radiation stimulus. Ionizing radiation is radiation with sufficient energy to remove electrons from atoms and may arise from spontaneous decay of unstable isotopes	resulting in alpha and beta particles and gamma rays. Ionizing radiation also includes X-rays. [GOC:mah] http://amigo.geneontology.org/amigo/term/GO:0071479 2025.1.Hs down
GOBP_REGULATION_OF_DOUBLE_STRAND_BREAK_REPAIR GO:2000779 M10088 61 0.37350391209050865 1.333609245463313 0.08713692946058091 0.8004379590333895 CREBBP	ACTR2	ERCC6	PRKDC	SPIDR	HELQ	SETD2	SMARCC1	ABL1	SMARCA2	KDM1A	SPIRE1	RTEL1	MBTD1	FOXM1	DDX11	RNF169 Any process that modulates the frequency	rate or extent of double-strand break repair. [GOC:BHF] http://amigo.geneontology.org/amigo/term/GO:2000779 2025.1.Hs up
GOBP_REGULATION_OF_CALCIUM_ION_TRANSMEMBRANE_TRANSPORT GO:1903169 M12642 56 0.37906877842918774 1.333282859913127 0.08401639344262295 0.8004379590333895 ASPH	CEMIP	UBQLN1	P2RX1	FKBP1A	PPP3CA	UCP2	PDE4D	PDE4B	ABL1	VMP1	JPH1	AHNAK	HTT	BAX	TRPC1	CHD7	STIM1	PTK2B	STAC	PDPK1	SLC8A1	PSEN2 Any process that modulates the frequency	rate or extent of calcium ion transmembrane transport. [GO_REF:0000058	GOC:BHF	GOC:rl	GOC:TermGenie	PMID:24125847] http://amigo.geneontology.org/amigo/term/GO:1903169 2025.1.Hs up
GOBP_CELLULAR_SENESCENCE GO:0090398 M11558 47 0.39283394039535396 1.3329506188738869 0.08502024291497975 0.8004379590333895 B2M	MNT	AKT3	MAP2K4	CALR	ABL1	MAPKAPK5	RSL1D1	KAT6A	TERF2	ZMIZ1	RBL1	NEK6	NDUFS6 A cell aging process stimulated in response to cellular stress	whereby normal cells lose the ability to divide through irreversible cell cycle arrest. [GOC:BHF	PMID:28682291] http://amigo.geneontology.org/amigo/term/GO:0090398 2025.1.Hs up
GOBP_REGULATION_OF_STRIATED_MUSCLE_CONTRACTION GO:0006942 M12174 28 0.4446839210118487 1.3320116079945126 0.10975609756097561 0.8004379590333895 DLG1	ASPH	FKBP1A	PDE4D	PDE4B	JPH1 Any process that modulates the frequency	rate or extent of striated muscle contraction. [GOC:go_curators] http://amigo.geneontology.org/amigo/term/GO:0006942 2025.1.Hs up
GOBP_HUMORAL_IMMUNE_RESPONSE GO:0006959 M13774 29 -0.43988116153925316 -1.3257344798037718 0.10756972111553785 0.8004379590333895 GAPDH	TNFRSF21	RBPJ	RPS19	PHB2	GPI	APP An immune response mediated through a body fluid. [GOC:hb	ISBN:0198506732] http://amigo.geneontology.org/amigo/term/GO:0006959 2025.1.Hs down
GOBP_NEGATIVE_REGULATION_OF_PROTEIN_CATABOLIC_PROCESS GO:0042177 M11768 45 -0.39732328299632597 -1.3227323884108728 0.09780439121756487 0.8004379590333895 TIMP1	RPL11	CAMLG	CST3	IRAK3	USP7	HSP90AB1	EIF3H Any process that stops	prevents or reduces the frequency	rate or extent of protein catabolic process. [GO_REF:0000058	GOC:kmv	GOC:obol	GOC:TermGenie	PMID:24785082] http://amigo.geneontology.org/amigo/term/GO:0042177 2025.1.Hs down
GOBP_TEMPERATURE_HOMEOSTASIS GO:0001659 M16432 61 0.37003055298414467 1.3212074909779712 0.0954356846473029 0.8004379590333895 SQSTM1	SCD	PGAM5	CLSTN3	ZNF423	TRPV1	DOCK7	UCP2	KDM1A	LPIN1	EHMT1	IL4R	ABHD6	SFXN5	RHEB	ADIPOR2	ADAM17	OMA1	LETMD1	PPARGC1B A homeostatic process in which an organism modulates its internal body temperature. [GOC:jl] http://amigo.geneontology.org/amigo/term/GO:0001659 2025.1.Hs up
GOBP_VASCULAR_TRANSPORT GO:0010232 M34087 37 -0.4116045870907025 -1.3210551543337938 0.10325047801147227 0.8004379590333895 SLC13A3	ABCC4	TFRC	ABCC1	SLC7A2	LEPR	ATP2B4	SLC2A3	SLC7A3	ABCC5	ATP2A3	ABCC3	FLVCR2	SLC38A1	SLC7A8 The directed movement of substances	into	out of or within a cell	either in a vascular tissue or in the vascular membrane. [GOC:sm] http://amigo.geneontology.org/amigo/term/GO:0010232 2025.1.Hs down
GOBP_T_CELL_DIFFERENTIATION_IN_THYMUS GO:0033077 M23178 30 0.42972732544827297 1.3208192468808042 0.10179640718562874 0.8004379590333895 NFATC3	ZEB1	B2M	PRKDC	ABL1 The process in which a precursor cell type acquires the specialized features of a T cell via a differentiation pathway dependent upon transit through the thymus. [GOC:add	ISBN:0781735149] http://amigo.geneontology.org/amigo/term/GO:0033077 2025.1.Hs up
GOBP_ENDOCYTIC_RECYCLING GO:0032456 M14656 35 0.41490958607887585 1.3166166454234076 0.10721649484536082 0.8004379590333895 ANKRD27	SCRIB	BVES	STX6	ARHGAP1	DENND1A	EHD1	DENND1B	GGA3	VPS13B	ATP9A	RAB35 The directed movement of membrane-bounded vesicles from endosomes back to the plasma membrane	a trafficking pathway that promotes the recycling of internalized transmembrane proteins. [PMID:16473635	PMID:23563491] http://amigo.geneontology.org/amigo/term/GO:0032456 2025.1.Hs up
GOBP_REGULATION_OF_POSTSYNAPSE_ORGANIZATION GO:0099175 M24857 59 -0.3738176717485969 -1.3159852858457777 0.08670520231213873 0.8004379590333895 SIPA1L1	CAPRIN1	PUM2	NEDD8	PRNP	APP	DOCK1	TANC2	PDLIM5	PTPRS	BAIAP2	VPS35	PSEN1	NF1	ABI2	RTN4	RAC1	ELMO1	SYNDIG1	ARF4	PPFIA2	EEF2K	ZMYND8	UBE3B	LRRK2	ABHD17B	EPHB2 Any process that modulates the physical form of a postsynapse. [GOC:ai	GOC:dph	GOC:tb] http://amigo.geneontology.org/amigo/term/GO:0099175 2025.1.Hs down
GOBP_MONONUCLEAR_CELL_MIGRATION GO:0071674 M24504 56 -0.37800426579587587 -1.3153647651927374 0.08949416342412451 0.8004379590333895 RPL13A	CNN2	THBS1	EXT1	CD99L2	RPS19	BCR	P4HB	LGMN	APP	IL27RA	WNK1	CRKL	TGFB1	MYO1G	SPI1	ICAM1	RHOA	ANO6	PIK3CG	RTN4 The movement of a mononuclear cell within or between different tissues and organs of the body. [GOC:mah] http://amigo.geneontology.org/amigo/term/GO:0071674 2025.1.Hs down
GOBP_REGULATION_OF_MICROTUBULE_POLYMERIZATION_OR_DEPOLYMERIZATION GO:0031110 M15466 43 0.3950314950385448 1.3144259579206374 0.09580838323353294 0.8004379590333895 ATXN7	MID1	CLASP1	SKA3	TBCD	HAUS6	MET	NAV3	CAMSAP1	ABL1	DYRK1A	ARHGEF2 Any process that modulates the frequency	rate or extent of microtubule polymerization or depolymerization by the addition or removal of tubulin heterodimers from a microtubule. [GOC:mah] http://amigo.geneontology.org/amigo/term/GO:0031110 2025.1.Hs up
GOBP_TRANSCRIPTION_BY_RNA_POLYMERASE_I GO:0006360 M22402 36 0.41301336002381345 1.3136252159911526 0.0975103734439834 0.8004379590333895 CREBBP	DHX33	TBP	FLNA	ERCC6 The synthesis of RNA from a DNA template by RNA polymerase I (RNAP I)	originating at an RNAP I promoter. [GOC:jl	GOC:txnOH] http://amigo.geneontology.org/amigo/term/GO:0006360 2025.1.Hs up
GOBP_DIGESTIVE_SYSTEM_DEVELOPMENT GO:0055123 M12187 46 -0.3929281894785271 -1.3133324979433858 0.1067193675889328 0.8004379590333895 CLMP	NCKAP1	HIF1A	EXT1	YAP1	OVOL2	PKDCC	WLS	IFT172	CRKL	TGFB1	WDR19 The process whose specific outcome is the progression of the digestive system over time	from its formation to the mature structure. The digestive system is the entire structure in which digestion takes place. Digestion is all of the physical	chemical	and biochemical processes carried out by multicellular organisms to break down ingested nutrients into components that may be easily absorbed and directed into metabolism. [GOC:jid] http://amigo.geneontology.org/amigo/term/GO:0055123 2025.1.Hs down
GOBP_REGULATION_OF_NERVOUS_SYSTEM_PROCESS GO:0031644 M13921 38 -0.4031776302656359 -1.3114867036539544 0.10857142857142857 0.8004379590333895 DICER1	TNFRSF21	STX1A	SSH1	EIF4A3	RNF10	APP	EIF2AK3 Any process that modulates the frequency	rate or extent of a neurophysiological process	an organ system process carried out by any of the organs or tissues of the nervous system. [GOC:dph	GOC:mah	GOC:tb] http://amigo.geneontology.org/amigo/term/GO:0031644 2025.1.Hs down
GOBP_POSITIVE_REGULATION_OF_JNK_CASCADE GO:0046330 M23778 35 0.4129438820160285 1.3103789522585425 0.10927835051546392 0.8004379590333895 MAP3K10	RNF13	AXIN1	STK3	DUSP22	SH3RF2	RASSF2	MAPKBP1	MAPK8IP3	TAOK1	EDA2R	PTK2B	GADD45A Any process that activates or increases the frequency	rate or extent of signal transduction mediated by the JNK cascade. [GOC:bf] http://amigo.geneontology.org/amigo/term/GO:0046330 2025.1.Hs up
GOBP_POSITIVE_REGULATION_OF_PRODUCTION_OF_MOLECULAR_MEDIATOR_OF_IMMUNE_RESPONSE GO:0002702 M14743 43 -0.39662180038843214 -1.3096912207896758 0.10978043912175649 0.8004379590333895 GALNT2	MLH1	HK1	PHB2	MAPKAPK2	GPI	TFRC	HMCES	TP53BP1	TGFB1 Any process that activates or increases the frequency	rate	or extent of the production of molecular mediator of immune response. [GOC:add] http://amigo.geneontology.org/amigo/term/GO:0002702 2025.1.Hs down
GOBP_REGULATION_OF_RNA_SPLICING GO:0043484 M16816 81 0.3454096706274735 1.308977679424332 0.08333333333333333 0.8004379590333895 POLR2A	DAZAP1	NUP98	ATXN7	PTBP3	TRA2B	RBM39	DDX5	PTBP1	HNRNPH1	AHNAK2	MBNL1	RBM4	HABP4	DYRK1A	AHNAK	SRSF4	CELF1 Any process that modulates the frequency	rate or extent of RNA splicing	the process of removing sections of the primary RNA transcript to remove sequences not present in the mature form of the RNA and joining the remaining sections to form the mature form of the RNA. [GOC:jl] http://amigo.geneontology.org/amigo/term/GO:0043484 2025.1.Hs up
GOBP_NUCLEOSIDE_PHOSPHATE_CATABOLIC_PROCESS GO:1901292 M14500 69 -0.35852663376669036 -1.3079832989780624 0.08411214953271028 0.8004379590333895 GAPDH	DDIT4	HIF1A	NUDT4	TPI1	HK1	CNP	NUDT5	GPI	PDE5A	APP	ENO1	ALDOA	VCP	SAMHD1	PPARA	COL6A1	PDE7B	STAT3	EP300 The chemical reactions and pathways resulting in the breakdown of a nucleoside phosphate. [GOC:TermGenie] http://amigo.geneontology.org/amigo/term/GO:1901292 2025.1.Hs down
GOBP_INORGANIC_ANION_TRANSPORT GO:0015698 M11296 40 0.40004398274078257 1.3066969475463912 0.09939148073022312 0.8004379590333895 GABRB3	ATP8B1	SLC4A7	UCP2	FGFR1	SLC26A7	SLC37A4	SLC12A9	GABRE	SLC1A4	CLNS1A	SLC4A4	CRY2	RACGAP1	SLC26A11 The directed movement of inorganic anions into	out of or within a cell	or between cells	by means of some agent such as a transporter or pore. Inorganic anions are atoms or small molecules with a negative charge which do not contain carbon in covalent linkage. [GOC:krc] http://amigo.geneontology.org/amigo/term/GO:0015698 2025.1.Hs up
GOBP_SUBSTRATE_ADHESION_DEPENDENT_CELL_SPREADING GO:0034446 M13894 49 0.38271269437732003 1.3041235015576351 0.09221311475409837 0.8004379590333895 ACTN4	PTK2	FERMT2	CORO1C	BVES	FLNA	ITGB7	CALR	UNC13D	RREB1	ABL1 The morphogenetic process that results in flattening of a cell as a consequence of its adhesion to a substrate. [GOC:mah	GOC:pf	PMID:17050732] http://amigo.geneontology.org/amigo/term/GO:0034446 2025.1.Hs up
GOBP_CARBOHYDRATE_CATABOLIC_PROCESS GO:0016052 M14508 58 -0.3719863143357941 -1.3009962255619452 0.09266409266409266 0.8004379590333895 GAPDH	DDIT4	HIF1A	TPI1	HK1	NUDT5	GPI	APP	ENO1	ALDOA	WIPI1	GK	GLB1	ENOSF1	PPARA	COL6A1	ATG3	STAT3	EP300 The chemical reactions and pathways resulting in the breakdown of carbohydrates	any of a group of organic compounds based of the general formula Cx(H2O)y. [ISBN:0198506732] http://amigo.geneontology.org/amigo/term/GO:0016052 2025.1.Hs down
GOBP_LOCOMOTORY_BEHAVIOR GO:0007626 M7204 67 -0.3598376030239307 -1.2991742897371663 0.08795411089866156 0.8004379590333895 NAV2	CCND2	PPT1	PPP3CB	CNP	APP	NCOA2	MTA1	MEIS1	HIPK2	ETV5	PUM1	ARCN1	GRN	OXR1	VPS35	SPG21	APBA2	ASL	PEX13 The specific movement from place to place of an organism in response to external or internal stimuli. Locomotion of a whole organism in a manner dependent upon some combination of that organism's internal state and external conditions. [GOC:dph] http://amigo.geneontology.org/amigo/term/GO:0007626 2025.1.Hs down
GOBP_ORGANOPHOSPHATE_CATABOLIC_PROCESS GO:0046434 M13815 83 -0.3457793052208077 -1.2986667952771318 0.1076923076923077 0.8004379590333895 GAPDH	DDIT4	HIF1A	NUDT4	TPI1	HK1	PRDX6	CNP	NUDT5	GPI	PDE5A	APP	ENO1	ALDOA	VCP	GDE1	SAMHD1	PLA2G4A	SCARB1	PPARA	COL6A1	PDE7B	STAT3	EP300 The chemical reactions and pathways resulting in the breakdown of organophosphates	any phosphate-containing organic compound. [GOC:ai] http://amigo.geneontology.org/amigo/term/GO:0046434 2025.1.Hs down
GOBP_ERBB_SIGNALING_PATHWAY GO:0038127 M12775 66 -0.3601016767985007 -1.29362027873281 0.09423076923076923 0.8004379590333895 HIP1	FBXW7	SNX5	EFEMP1	CAMLG	RBPJ	PTPN11	SHC3	LGMN	REPS2	MAP2K2	CBL	TGFB1	BRAF	RAB7A	GRB2	MVB12B	KIF16B	IFI6 The series of molecular signals initiated by binding of a ligand to a member of the ERBB family of receptor tyrosine kinases on the surface of a cell	and ending with the regulation of a downstream cellular process	e.g. transcription. [GOC:jc	PMID:16460914	Wikipedia:ErbB] http://amigo.geneontology.org/amigo/term/GO:0038127 2025.1.Hs down
GOBP_DETECTION_OF_STIMULUS GO:0051606 M14602 43 0.38843728747457695 1.292484422364972 0.10978043912175649 0.8004379590333895 PTK2	ASPH	EXTL3	TRPV1	GNAQ The series of events in which a stimulus is received by a cell or organism and converted into a molecular signal. [GOC:add	GOC:ai	GOC:dph	GOC:mah] http://amigo.geneontology.org/amigo/term/GO:0051606 2025.1.Hs up
GOBP_AMIDE_TRANSPORT GO:0042886 M42787 81 -0.34732973703744613 -1.2918830629777363 0.08627450980392157 0.8004379590333895 RPH3AL	PER2	SLC13A3	STX1A	HIF1A	PPP3CB	PTPN11	ABCC4	ABCC1	ITPR1	SNX19	CPT1A	PRKCA	VAPA The directed movement of an amide	any compound containing one	two	or three acyl groups attached to a nitrogen atom	into	out of or within a cell	or between cells	by means of some agent such as a transporter or pore. [GOC:jl	ISBN:0198506732] http://amigo.geneontology.org/amigo/term/GO:0042886 2025.1.Hs down
GOBP_REGULATION_OF_RESPONSE_TO_CYTOKINE_STIMULUS GO:0060759 M15741 60 -0.3653291516025886 -1.291378799723796 0.09596928982725528 0.8004379590333895 DICER1	HIF1A	EXT1	IRAK3	PTPN11	MAPKAPK2	CPNE1	GSTP1	SLIT3	HIPK1	SAMHD1 Any process that modulates the rate	frequency	or extent of a response to cytokine stimulus. [GOC:BHF	GOC:dph	GOC:tb] http://amigo.geneontology.org/amigo/term/GO:0060759 2025.1.Hs down
GOBP_POSITIVE_REGULATION_OF_MRNA_METABOLIC_PROCESS GO:1903313 M29345 67 0.3543995040133069 1.2909244613912907 0.08977035490605428 0.8004379590333895 CNOT6L	DAZAP1	NUP98	CNOT1	CNOT10	FXR1	TNRC6B	TRA2B	CNOT2	CNOT6	PAN3	SAMD4A	ZC3HAV1	CNOT11	CELF1	AGO3	CCNB1	CLNS1A	AGO2	TNRC6A	YTHDF2	RC3H2	GIGYF2	PARN	EXOSC10	NT5C3B Any process that activates or increases the frequency	rate or extent of mRNA metabolic process. [GO_REF:0000058	GOC:TermGenie	GOC:vw] http://amigo.geneontology.org/amigo/term/GO:1903313 2025.1.Hs up
GOBP_RESPONSE_TO_TOPOLOGICALLY_INCORRECT_PROTEIN GO:0035966 M16675 67 -0.3575426439200538 -1.2908884634680402 0.08986615678776291 0.8004379590333895 CREB3L1	HSP90AA1	HSPB1	THBS1	VAPB	UBR5	EIF2AK3	UBR4	HSPA4	EDEM2	HSP90AB1	ATF6	VCP	BFAR Any process that results in a change in state or activity of a cell or an organism (in terms of movement	secretion	enzyme production	gene expression	etc.) as a result of a protein that is not folded in its correct three-dimensional structure. [GOC:bf] http://amigo.geneontology.org/amigo/term/GO:0035966 2025.1.Hs down
GOBP_MEMBRANE_FUSION GO:0061025 M11041 69 -0.3536966550050129 -1.2903624837869547 0.09345794392523364 0.8004379590333895 UVRAG	RPH3AL	STX1A	CHP1	STX5	RAB2A	CHMP4A	CHMP5	HUWE1	STXBP1	USO1	VPS11	VAPA	VTI1B	RAB7A	KIAA0319L	STX18	PIP4K2A	ARL8B	NSFL1C	CHMP3	RABEP1	ANKFY1 The membrane organization process that joins two lipid bilayers to form a single membrane. [GOC:dph	GOC:tb] http://amigo.geneontology.org/amigo/term/GO:0061025 2025.1.Hs down
GOBP_DEVELOPMENTAL_CELL_GROWTH GO:0048588 M14996 86 -0.34011270266985705 -1.2898572690192303 0.09980806142034548 0.8004379590333895 FN1	PPP3CB	EXT1	PUM2	DDR1	YY1	APP	CPNE1	VCL	SLIT3	MEIS1	BMPR2	CYFIP1	PDLIM5	NEDD4L	ULK2	LIMK1	PPARA	PTPRS	SPAG9	NDEL1	ZFYVE27	SPG21 The growth of a cell	where growth contributes to the progression of the cell over time from one condition to another. [GOC:go_curators	GOC:isa_complete] http://amigo.geneontology.org/amigo/term/GO:0048588 2025.1.Hs down
GOBP_DEVELOPMENT_OF_PRIMARY_SEXUAL_CHARACTERISTICS GO:0045137 M16813 76 0.3471725729387445 1.287815902800189 0.08298755186721991 0.8004379590333895 GAS2	RHOBTB3	EIF2S2	NRIP1	UBE3A	FLNA	TIPARP	CCND1	SLIT2	FANCA	ACVR2A	ZFY	BAX	NUP107	CTNNA1	NUP210L	DMC1	GFRA1 The process whose specific outcome is the progression of the primary sexual characteristics over time	from their formation to the mature structures. The primary sexual characteristics are the testes in males and the ovaries in females and they develop in response to sex hormone secretion. [GOC:ai] http://amigo.geneontology.org/amigo/term/GO:0045137 2025.1.Hs up
GOBP_RESPONSE_TO_MOLECULE_OF_BACTERIAL_ORIGIN GO:0002237 M16728 88 -0.3379839457762718 -1.2839867317353229 0.09001956947162426 0.8004379590333895 RPL13A	VIM	HDAC5	IRAK3	PTPN11	MAPKAPK2	BCR	CHMP5	GPX1	ADAM9	GSTP1	NFKB1	PRKCA	TLR1	SPI1	SCARB1	COL6A1	RHOA	HADHB	CDK19	CAPN2	RAC1	OTUD5	MAPKAPK3	PRDX3	AKAP8	E2F1	PLCG2	MTDH	MEF2C Any process that results in a change in state or activity of an organism (in terms of movement	secretion	enzyme production	gene expression	etc.) as a result of a stimulus by molecules of bacterial origin such as peptides derived from bacterial flagellin. [GOC:rl	GOC:sm] http://amigo.geneontology.org/amigo/term/GO:0002237 2025.1.Hs down
GOBP_ADAPTIVE_THERMOGENESIS GO:1990845 M25419 58 0.3629686782462658 1.2827513338080268 0.10743801652892562 0.8004379590333895 SCD	PGAM5	CLSTN3	ZNF423	TRPV1	DOCK7	UCP2	KDM1A	LPIN1	EHMT1	IL4R	ABHD6	SFXN5	RHEB	ADIPOR2	ADAM17	OMA1	LETMD1	PPARGC1B The regulated production of heat in response to short term environmental changes	such as stress	diet or reduced temperature. [PMID:17260010	PMID:20363363] http://amigo.geneontology.org/amigo/term/GO:1990845 2025.1.Hs up
GOBP_BONE_DEVELOPMENT GO:0060348 M12408 80 -0.34453760087125335 -1.2786787669176893 0.1095890410958904 0.8004379590333895 FBXW7	CSGALNACT1	EXT1	FBN1	AXIN2	DHRS3	TGM2	RUNX2	LTBP3	XYLT1	POR	LEPR	SMAD1	LRRK1	ZBTB16	BMPR2	IFT172	TGFB1	BGN	INPPL1	COL6A1	BBX	RHOA	PAPPA2	DDR2	DYM	AKAP13	SLC38A10 The process whose specific outcome is the progression of bone over time	from its formation to the mature structure. Bone is the hard skeletal connective tissue consisting of both mineral and cellular components. [GOC:dph] http://amigo.geneontology.org/amigo/term/GO:0060348 2025.1.Hs down
GOBP_POSITIVE_REGULATION_OF_PROTEIN_LOCALIZATION_TO_NUCLEUS GO:1900182 M12260 53 -0.37142362668143125 -1.274994678922371 0.109375 0.8004379590333895 RBM22	HSP90AA1	PPP3CB	WWTR1	UBR5	JAK1	YAP1	TFRC	TERT	EIF2AK3	TGFB1	KAT7	JUP	TYK2	CCT6A	EP300	PSEN1	PIK3R1 Any process that activates or increases the frequency	rate or extent of protein localization to nucleus. [GOC:TermGenie] http://amigo.geneontology.org/amigo/term/GO:1900182 2025.1.Hs down
GOBP_POSITIVE_REGULATION_OF_IMMUNE_EFFECTOR_PROCESS GO:0002699 M14875 68 -0.35192164212432003 -1.274701948690701 0.10266159695817491 0.8004379590333895 GALNT2	MLH1	HK1	SLAMF6	RPS19	PHB2	MAPKAPK2	GPI	TFRC	STXBP1	STAT5B	HMCES	TP53BP1	TGFB1	SPI1 Any process that activates or increases the frequency	rate	or extent of an immune effector process. [GOC:add] http://amigo.geneontology.org/amigo/term/GO:0002699 2025.1.Hs down
GOBP_REGULATION_OF_CELL_SUBSTRATE_ADHESION GO:0010810 M14273 98 0.326594381979184 1.2672502617384966 0.1031578947368421 0.8004379590333895 PLEKHA2	ACTN4	PTK2	FERMT2	CORO1C	CLASP1	DUSP3	FLNA	TBCD	CALR	UNC13D	RREB1	DUSP22	SDC4	ABL1	GSK3B Any process that modulates the frequency	rate or extent of cell-substrate adhesion. Cell-substrate adhesion is the attachment of a cell to the underlying substrate via adhesion molecules. [GOC:dph	GOC:pf	GOC:tb] http://amigo.geneontology.org/amigo/term/GO:0010810 2025.1.Hs up
GOBP_RESPONSE_TO_LIGHT_STIMULUS GO:0009416 M16292 109 -0.31507247407153915 -1.2489600349274854 0.09176029962546817 0.8004379590333895 TIMP1	COL6A3	FBXW7	CREB1	PER2	HIF1A	COL6A2	EXT1	GPSM2	CEP250	EI24	YY1	GPX1	APP	MTA1	ERCC2	MAP3K4	BRAF	PTPRK	SCARA3	COL6A1	DYNLRB1	ERCC5	BRCA2	EP300 Any process that results in a change in state or activity of a cell or an organism (in terms of movement	secretion	enzyme production	gene expression	etc.) as a result of a light stimulus	electromagnetic radiation of wavelengths classified as infrared	visible or ultraviolet light. [GOC:go_curators	ISBN:0582227089] http://amigo.geneontology.org/amigo/term/GO:0009416 2025.1.Hs down
GOBP_REGULATION_OF_BODY_FLUID_LEVELS GO:0050878 M16235 112 -0.31043560305189744 -1.2329281301733404 0.096045197740113 0.8004379590333895 CREB1	MYL9	ACTB	HIF1A	HSPB1	THBS1	EXT1	TLN1	PPIA	DDR1	GPI	STXBP1	VCL	STAT5B	WNK1	HPS4	PABPC4	ANGPTL4	PRKCA	GNAI2	PLA2G4A	CAD	COPA	ANXA8	ACTG1	ANO6	CD59	PIK3CG	NCOR2	SCNN1A	FLI1	PRRG1	PLEK	AP3B1	METAP1	ADA	VPS33B	SVEP1	PLAUR	LCK	PLCG2	DGKA	ITPR3	PDGFRA	PRKG1	CSRP1	EPHB2 Any process that modulates the levels of body fluids. [GOC:ai	GOC:dph	GOC:tb] http://amigo.geneontology.org/amigo/term/GO:0050878 2025.1.Hs down
GOBP_CYTOKINE_MEDIATED_SIGNALING_PATHWAY GO:0019221 M898 139 -0.2984645739267351 -1.2221195661899473 0.09633911368015415 0.8004379590333895 DICER1	MX1	CD44	HIF1A	EXT1	IRAK3	PTPN11	JAK1	MAPKAPK2	IFNGR2	COMMD7	YAP1	P4HB	CPNE1	IL27RA	GSTP1	STAT5B	SLIT3	WNK1	LEPR	BBS2	NFKB1	CBL	HIPK1	TYK2	SPI1	SAMHD1 The series of molecular signals initiated by the binding of a cytokine to a receptor on the surface of a cell	and ending with the regulation of a downstream cellular process	e.g. transcription. [GOC:mah	GOC:signaling	PMID:19295629] http://amigo.geneontology.org/amigo/term/GO:0019221 2025.1.Hs down
GOBP_REGULATION_OF_APOPTOTIC_SIGNALING_PATHWAY GO:2001233 M16933 129 -0.30088553554007513 -1.218002936400969 0.10058027079303675 0.8004379590333895 TPT1	FBXW7	CD44	CREB3L1	HIF1A	HSPB1	THBS1	PPIA	EI24	ZMYND11	YAP1	GPX1	P4HB	EYA3	APP	SERINC3	ENO1	TERT	PAK2	GSTP1	EIF2AK3	RPS3	TP53BP1	GNAI2	EEF1E1	TGFBR1	ICAM1	IFI6	FAF1	STYXL1	GRINA	PSEN1	NF1	EYA1	NONO	CTSC	FAIM	PINK1 Any process that modulates the frequency	rate or extent of apoptotic signaling pathway. [GOC:mtg_apoptosis] http://amigo.geneontology.org/amigo/term/GO:2001233 2025.1.Hs down
GOBP_OSSIFICATION GO:0001503 M14199 154 -0.2881062980292253 -1.2003011461013444 0.1076923076923077 0.8004379590333895 ATP2B1	CSGALNACT1	CREB3L1	HIF1A	TPM4	EXT1	WWTR1	RBPJ	SND1	PTPN11	AXIN2	SRGN	DHRS3	YAP1	SUCO	FHL2	RUNX2	LTBP3	XYLT1	EIF2AK3	ZHX3	ERCC2	PTN	SMAD1	SUFU	ZBTB16	BMPR2	PKDCC	VEGFC	TGFB1	SMOC1	RUNX1	SLC20A2	INPPL1	COL6A1	COL1A2	HNRNPC The formation of bone or of a bony substance	or the conversion of fibrous tissue or of cartilage into bone or a bony substance. [GOC:mtg_mpo	PMID:17572649] http://amigo.geneontology.org/amigo/term/GO:0001503 2025.1.Hs down
GOBP_SKELETAL_SYSTEM_DEVELOPMENT GO:0001501 M10584 166 -0.2863712767816145 -1.1965557483641407 0.10038610038610038 0.8004379590333895 TIMP1	FBXW7	CD44	CSGALNACT1	EFEMP1	HIF1A	EXT1	PAX5	PUM2	PTPN11	FBN1	AXIN2	EIF4A3	DHRS3	TGM2	RUNX2	LTBP3	XYLT1	EIF2AK3	MTHFD1L	POR	SNX19	LEPR	BBS2	SMAD1	LRRK1	ZBTB16	BMPR2	PKDCC	IFT172	TGFB1	WDR19	BGN	RUNX1	TGFBR1	INPPL1	COL6A1	COL1A2	BBX	KIAA1217	RHOA	PRKG2	TRPS1	PAPPA2	PSEN1	DDR2	DYM	NFIA	EYA1	AKAP13
GOBP_MEMBRANE_ORGANIZATION GO:0061024 M15146 308 -0.2627039070874992 -1.1922045317785281 0.09302325581395349 0.8004379590333895 DNAJC11	MX1	UVRAG	RPH3AL	FNTA	STX1A	NOMO1	CAMLG	PPT1	THBS1	VAPB	PITPNA	SSH1	CHP1	SEC23A	EXOC7	STX5	BNIP3L	RAB2A	EMC1	CHMP4A	NOMO3	TRAPPC4	VDAC2	SEC24A	CHMP5	HUWE1	ABCC1	SERINC2	RAB31	STXBP1	SERINC3	CHCHD10	EHD2	USO1	AP3S1	WNK1	FARP1	EMC2	VPS11	TRAPPC9	DOCK1	ETV5	PIP5K1C	CRKL	PRKCA	SEC13	VAPA	MTMR3	AAK1
GOBP_NUCLEOBASE_CONTAINING_COMPOUND_CATABOLIC_PROCESS GO:0034655 M49425 226 -0.2710882866944065 -1.185089141335762 0.10887096774193548 0.8004379590333895 DICER1	DNASE1	EIF4ENIF1	GAPDH	APEX1	EIF3E	VIM	PABPC1	MLH1	DDIT4	HIF1A	NUDT4	TPI1	HK1	CAPRIN1	PUM2	SND1	MAPKAPK2	CNP	RBM33	NUDT5	AXIN2	GPI	EIF4A3	ATM	ALKBH5	PDE5A	APP	ENO1	ZCCHC7	FTO	ALDOA	PATL2	CTIF	PABPC4	ZCCHC17	SMG5	VCP	PUM1	PRKCA	TNRC6C	ETF1 The chemical reactions and pathways resulting in the breakdown of nucleobases	nucleosides	nucleotides and nucleic acids. [GOC:mah] http://amigo.geneontology.org/amigo/term/GO:0034655 2025.1.Hs down
GOBP_POSITIVE_REGULATION_OF_CELL_DIFFERENTIATION GO:0045597 M12912 305 -0.25936417302237247 -1.1724507951742622 0.09823182711198428 0.8004379590333895 FN1	DICER1	CREB1	ARID1B	ACTB	HIF1A	CUX1	LAMC1	CAPRIN1	WWTR1	ROBO2	TGFB1I1	WDFY2	TCF12	MMD	LAMB1	NPTN	AXIN2	YAP1	SUCO	NAP1L1	TGM2	APP	SYAP1	CPNE1	RUNX2	OVOL2	TERT	LTBP3	STAT5B	POR	ZHX3	PTN	NFKB1	SMAD1	MAP2K2	ZBTB16	NID1	HSP90AB1	BMPR2	NCOA3	PKDCC	ETV5	VEGFC	TGFB1	KAT7	PRKCA	AMBRA1	BRAF	NF2
GOBP_REGULATION_OF_SECRETION GO:0051046 M531 178 -0.27940383629442483 -1.1845059265363918 0.11067961165048544 0.8043908549953023 MCTP2	RPH3AL	CREB1	PER2	STX1A	HIF1A	PPP3CB	PTPN11	PPIA	RAB11FIP3	BCR	SEC24A	STXBP1	ADAM9	ITPR1	WNK1	CPT1A	FRMD4A	WLS	VEGFC	TGFB1	PRKCA	GNAI2	BRAF	SPI1	UNC13B	RAB7A	PLA2G4A	STXBP5	MYO6	RFX3	ATP2A2	RAB11FIP1	VPS35	PDCD6IP	CHMP3	NF1	GOLPH3L	RAC1	PINK1	GNAI1	RAB5A	PRKCB	GOLPH3	ADA	PPFIA2	DYNLL1	STXBP6	SYT15	FBXO45
GOBP_MODIFIED_AMINO_ACID_BIOSYNTHETIC_PROCESS GO:0042398 M6149 18 -0.5078355599752202 -1.380830094925641 0.11155378486055777 0.8081372260155519 MTHFD1L	ALDH7A1	PTDSS1	ATIC	GCLC	SHMT1	GGT7	MTHFS	GCLM The chemical reactions and pathways resulting in the formation of compounds derived from amino acids	organic acids containing one or more amino substituents. [GOC:ai] http://amigo.geneontology.org/amigo/term/GO:0042398 2025.1.Hs down
GOBP_REGULATION_OF_B_CELL_MEDIATED_IMMUNITY GO:0002712 M13261 15 -0.5334578458417384 -1.3852871814147545 0.1130952380952381 0.8089002267573696 MLH1	TFRC	IL27RA	HMCES	TP53BP1	TGFB1 Any process that modulates the frequency	rate	or extent of B cell mediated immunity. [GOC:add] http://amigo.geneontology.org/amigo/term/GO:0002712 2025.1.Hs down
GOBP_ANTERIOR_POSTERIOR_PATTERN_SPECIFICATION GO:0009952 M12766 54 -0.3733388869792026 -1.2842192014611655 0.11220472440944881 0.8089002267573696 NCKAP1	RBPJ	MLLT3	SEMA3C	AXIN2	YY1	ATM	HIPK2	ZBTB16	BMPR2	WLS	PGAP1	CRKL	SSBP3	HIPK1	TGFBR1 The regionalization process in which specific areas of cell differentiation are determined along the anterior-posterior axis. The anterior-posterior axis is defined by a line that runs from the head or mouth of an organism to the tail or opposite end of the organism. [GOC:dph	GOC:go_curators	GOC:isa_complete	GOC:tb] http://amigo.geneontology.org/amigo/term/GO:0009952 2025.1.Hs down
GOBP_HORMONE_TRANSPORT GO:0009914 M11292 84 -0.33900161557314135 -1.2725079214264827 0.11306042884990253 0.8089002267573696 RPH3AL	CREB1	PER2	STX1A	HIF1A	PPP3CB	PTPN11	RAB11FIP3	ITPR1	SNX19	CPT1A	PRKCA The directed movement of hormones into	out of or within a cell	or between cells	by means of some agent such as a transporter or pore. [GOC:tb] http://amigo.geneontology.org/amigo/term/GO:0009914 2025.1.Hs down
GOBP_PATTERN_SPECIFICATION_PROCESS GO:0007389 M5927 133 -0.2923352406191197 -1.188418166752491 0.11306042884990253 0.8089002267573696 NCKAP1	HIF1A	NOMO1	EXT1	PKD2	RBPJ	ROBO2	MLLT3	SEMA3C	AXIN2	NOMO3	BICC1	YY1	ATM	OVOL2	DYNC2H1	MEIS1	HIPK2	SMAD1	SUFU	ZBTB16	BMPR2	WLS	AP1B1	PGAP1	IFT172	CRKL	SSBP3	HIPK1	IFT122	WDR19	TGFBR1 Any developmental process that results in the creation of defined areas or spaces within an organism to which cells respond and eventually are instructed to differentiate. [GOC:go_curators	GOC:isa_complete	ISBN:0521436125] http://amigo.geneontology.org/amigo/term/GO:0007389 2025.1.Hs down
GOBP_AMINE_TRANSPORT GO:0015837 M22784 17 -0.502299113144119 -1.3503381681414512 0.12224448897795591 0.8143373493975903 PER2	STX1A	STXBP1	SLC43A1	PSEN1	PINK1	FLVCR2	PRKG1 The directed movement of amines	including polyamines	organic compounds containing one or more amino groups	into	out of or within a cell	or between cells	by means of some agent such as a transporter or pore. [GOC:ai	ISBN:0198506732] http://amigo.geneontology.org/amigo/term/GO:0015837 2025.1.Hs down
GOBP_POSITIVE_REGULATION_OF_OSSIFICATION GO:0045778 M16952 19 -0.4901455935800176 -1.349689172487275 0.12524850894632206 0.8143373493975903 ATP2B1	PTPN11	PTN	ZBTB16	BMPR2	PKDCC	SLC20A2	ANO6 Any process that activates or increases the frequency	rate or extent of ossification	the formation of bone or of a bony substance or the conversion of fibrous tissue or of cartilage into bone or a bony substance. [GOC:go_curators] http://amigo.geneontology.org/amigo/term/GO:0045778 2025.1.Hs down
GOBP_ANIMAL_ORGAN_FORMATION GO:0048645 M23872 17 -0.5008774965703965 -1.3465164151864362 0.12224448897795591 0.8143373493975903 EXT1	RBPJ	ROBO2	AXIN2	MAP2K2 The process pertaining to the initial formation of an animal organ from unspecified parts. The process begins with the specific processes that contribute to the appearance of the discrete structure	such as inductive events	and ends when the structural rudiment of the organ is recognizable	such as a condensation of mesenchymal cells into the organ rudiment. Organs are a natural part or structure in an animal or a plant	capable of performing some special action (termed its function)	which is essential to the life or well-being of the whole. The heart and lungs are organs of animals	and the petal and leaf are organs of plants. In animals the organs are generally made up of several tissues	one of which usually predominates	and determines the principal function of the organ. [GOC:dph	GOC:jid] http://amigo.geneontology.org/amigo/term/GO:0048645 2025.1.Hs down
GOBP_NEGATIVE_REGULATION_OF_PROTEIN_BINDING GO:0032091 M12295 15 0.5082418222021491 1.3265355420218357 0.12650602409638553 0.8143373493975903 PTPRF	SYMPK	BAX	DDX11	AURKA	MITD1 Any process that stops	prevents	or reduces the frequency	rate or extent of protein binding. [GOC:mah] http://amigo.geneontology.org/amigo/term/GO:0032091 2025.1.Hs up
GOBP_BODY_FLUID_SECRETION GO:0007589 M14825 21 -0.4748146200809526 -1.3257622398593318 0.11740890688259109 0.8143373493975903 CREB1	HIF1A	DDR1	STAT5B	WNK1	CAD	COPA	NCOR2	ADA The controlled release of a fluid by a cell or tissue in an animal. [GOC:ai	GOC:dph	GOC:mah	GOC:tb] http://amigo.geneontology.org/amigo/term/GO:0007589 2025.1.Hs down
GOBP_POLYSACCHARIDE_METABOLIC_PROCESS GO:0005976 M2986 29 -0.43735315298513683 -1.3181154490325897 0.11952191235059761 0.8143373493975903 PHKG1	PER2	EXT1	WIPI1	LEPR	NFKB1	TGFB1	ATG3	EPM2A	UGP2	GRB10	PHKA2 The chemical reactions and pathways involving a polysaccharide	a polymer of many (typically more than 10) monosaccharide residues linked glycosidically. [ISBN:0198547684] http://amigo.geneontology.org/amigo/term/GO:0005976 2025.1.Hs down
GOBP_POSITIVE_REGULATION_OF_PROTEIN_IMPORT_INTO_NUCLEUS GO:0042307 M45145 22 -0.46963418725946565 -1.3168612918769511 0.125 0.8143373493975903 RBM22	HSP90AA1	UBR5	TGFB1	JUP	EP300	PSEN1	PIK3R1	HDAC3 Any process that activates or increases the frequency	rate or extent of movement of proteins from the cytoplasm into the nucleus. [GOC:jl] http://amigo.geneontology.org/amigo/term/GO:0042307 2025.1.Hs down
GOBP_BONE_MORPHOGENESIS GO:0060349 M15227 34 -0.4185728063314727 -1.3115376109346801 0.12375249500998003 0.8143373493975903 CSGALNACT1	EXT1	AXIN2	DHRS3	RUNX2	LTBP3	POR	BMPR2	TGFB1	INPPL1	PAPPA2 The process in which bones are generated and organized. [GOC:dph] http://amigo.geneontology.org/amigo/term/GO:0060349 2025.1.Hs down
GOBP_POSITIVE_REGULATION_OF_CALCIUM_ION_TRANSPORT GO:0051928 M10087 31 0.42370604524724853 1.3112817070756855 0.12648221343873517 0.8143373493975903 ASPH	CEMIP	P2RX1	LPAR3	PPP3CA	ABL1	VMP1	HTT	BAX	TRPC1	STIM1 Any process that activates or increases the frequency	rate or extent of the directed movement of calcium ions into	out of or within a cell	or between cells	by means of some agent such as a transporter or pore. [GOC:ai] http://amigo.geneontology.org/amigo/term/GO:0051928 2025.1.Hs up
GOBP_INTERMEDIATE_FILAMENT_BASED_PROCESS GO:0045103 M10384 30 0.4264226212259383 1.310661836160984 0.1157684630738523 0.8143373493975903 KRT19	PLEC	ARHGEF28	KRT5	KRT7	DST Any cellular process that depends upon or alters the intermediate filament cytoskeleton	that part of the cytoskeleton comprising intermediate filaments and their associated proteins. [GOC:ai] http://amigo.geneontology.org/amigo/term/GO:0045103 2025.1.Hs up
GOBP_STEM_CELL_DEVELOPMENT GO:0048864 M45161 25 -0.44624458162859004 -1.3104168860679712 0.12326043737574553 0.8143373493975903 FN1	SEMA4G	HIF1A	SEMA3C	OVOL2 The process whose specific outcome is the progression of the stem cell over time	from its formation to the mature structure. Cell development does not include the steps involved in committing a cell to its specific fate. [CL:0000034	GOC:isa_complete] http://amigo.geneontology.org/amigo/term/GO:0048864 2025.1.Hs down
GOBP_ENDOCRINE_SYSTEM_DEVELOPMENT GO:0035270 M15186 35 -0.41173484663713816 -1.3096372832245002 0.11605415860735009 0.8143373493975903 CREB1	RBPJ	EIF2AK3	HIPK2	MAP2K2	CRKL	BRAF	TGFBR1	RFX3	NF1 Progression of the endocrine system over time	from its formation to a mature structure. The endocrine system is a system of hormones and ductless glands	where the glands release hormones directly into the blood	lymph or other intercellular fluid	and the hormones circulate within the body to affect distant organs. The major glands that make up the human endocrine system are the hypothalamus	pituitary	thyroid	parathryoids	adrenals	pineal body	and the reproductive glands which include the ovaries and testes. [GOC:bf	Wikipedia:Development_of_the_endocrine_system] http://amigo.geneontology.org/amigo/term/GO:0035270 2025.1.Hs down
GOBP_REGULATION_OF_PROTEIN_BINDING GO:0043393 M10370 30 0.4250213005690107 1.3063547065345615 0.1217564870259481 0.8143373493975903 PTPRF	RAN	MMP9	ABL1	SYMPK	GSK3B	BAX	DDX11	AURKA	GAS8	EPB41	MITD1 Any process that modulates the frequency	rate or extent of protein binding. [GOC:go_curators] http://amigo.geneontology.org/amigo/term/GO:0043393 2025.1.Hs up
GOBP_REGULATION_OF_B_CELL_ACTIVATION GO:0050864 M14227 37 -0.4048154182464338 -1.299265148156367 0.12237093690248566 0.8143373493975903 TNFRSF21	MLH1	THEMIS2	TFRC	ATM	IL27RA	STAT5B	HMCES	TP53BP1	TGFB1	SPI1 Any process that modulates the frequency	rate or extent of B cell activation. [GOC:ai] http://amigo.geneontology.org/amigo/term/GO:0050864 2025.1.Hs down
GOBP_NUCLEOSIDE_DIPHOSPHATE_CATABOLIC_PROCESS GO:0009134 M22570 44 -0.3865816552621877 -1.2928157660593325 0.11683168316831684 0.8143373493975903 GAPDH	DDIT4	HIF1A	TPI1	HK1	NUDT5	GPI	APP	ENO1	ALDOA	PPARA	COL6A1	STAT3	EP300	PSEN1 The chemical reactions and pathways resulting in the breakdown of a nucleoside diphosphate	a compound consisting of a nucleobase linked to a deoxyribose or ribose sugar esterified with diphosphate on the sugar. [GOC:go_curators	ISBN:0198506732] http://amigo.geneontology.org/amigo/term/GO:0009134 2025.1.Hs down
GOBP_POSITIVE_REGULATION_OF_DOUBLE_STRAND_BREAK_REPAIR GO:2000781 M25529 40 0.39293263901058917 1.2834685738022518 0.12373225152129817 0.8143373493975903 CREBBP	ACTR2	ERCC6	PRKDC	SPIDR	HELQ	SMARCC1	SMARCA2	SPIRE1	MBTD1	FOXM1	DDX11 Any process that activates or increases the frequency	rate or extent of double-strand break repair. [GOC:BHF] http://amigo.geneontology.org/amigo/term/GO:2000781 2025.1.Hs up
GOBP_FATTY_ACID_BIOSYNTHETIC_PROCESS GO:0006633 M13591 49 0.37570455756808263 1.2802427261108533 0.11885245901639344 0.8143373493975903 FADS2	SCD	TMEM135	EIF6	DAGLB	SCAP	ABHD2	ACSF3	PTGES3	FASN	FADS1	ACACA	HACD1 The chemical reactions and pathways resulting in the formation of a fatty acid	any of the aliphatic monocarboxylic acids that can be liberated by hydrolysis from naturally occurring fats and oils. Fatty acids are predominantly straight-chain acids of 4 to 24 carbon atoms	which may be saturated or unsaturated; branched fatty acids and hydroxy fatty acids also occur	and very long chain acids of over 30 carbons are found in waxes. [GOC:mah	ISBN:0198506732] http://amigo.geneontology.org/amigo/term/GO:0006633 2025.1.Hs up
GOBP_INTEGRIN_MEDIATED_SIGNALING_PATHWAY GO:0007229 M15881 50 -0.37573006682562016 -1.2749061261792436 0.11834319526627218 0.8143373493975903 FN1	TIMP1	LAMC1	ITGB4	TLN1	PTPN11	LAMB1	ITGB5	ADAM9	PTN	ITGA5	CCM2	NID1	DOCK1 The series of molecular signals initiated by an extracellular ligand binding to an integrin on the surface of a target cell	and ending with the regulation of a downstream cellular process	e.g. transcription. [GOC:mah	GOC:signaling] http://amigo.geneontology.org/amigo/term/GO:0007229 2025.1.Hs down
GOBP_REGULATION_OF_CELL_SUBSTRATE_JUNCTION_ORGANIZATION GO:0150116 M34282 38 0.3953908082258984 1.2734665494673059 0.11530398322851153 0.8143373493975903 PTK2	FERMT2	CORO1C	CLASP1	DUSP3	DUSP22	SDC4	ABL1 Any process that modulates the frequency	rate or extent of cell-substrate junction organization. [GOC:aruk] http://amigo.geneontology.org/amigo/term/GO:0150116 2025.1.Hs up
GOBP_MICROTUBULE_ORGANIZING_CENTER_ORGANIZATION GO:0031023 M2497 79 -0.3405091017716459 -1.2658394421756702 0.12209302325581395 0.8143373493975903 UVRAG	CEP85	SSX2IP	PKD2	PDE4DIP	CEP192	CEP250	CHMP5	CEP135	CCDC57	HAUS1	WDR62	BRCA2	CCDC102B	NDEL1	CHD3	C2CD3	PDCD6IP	NSFL1C	CHMP3	CNTROB	CDK5RAP2	MARK4 A process that is carried out at the cellular level which results in the assembly	arrangement of constituent parts	or disassembly of a microtubule organizing center	a structure from which microtubules grow. [GOC:dph	GOC:jl	GOC:mah] http://amigo.geneontology.org/amigo/term/GO:0031023 2025.1.Hs down
GOBP_RESPIRATORY_SYSTEM_DEVELOPMENT GO:0060541 M15095 82 -0.3377007282360946 -1.2649198367785057 0.1218568665377176 0.8143373493975903 RPL13A	CREB1	CRISPLD2	EXT1	RBPJ	FBN1	YAP1	LTBP3	YWHAZ	HIPK2	MAP2K2	BMPR2	PKDCC	TGFB1	COL6A1	EP300	EPAS1	DISP1	DLG5	CCDC40	MYOCD	AP3B1	ADA	IGFBP5	GLI3	TMEM38B	LIPA The progression of the respiratory system over time from its formation to its mature structure. The respiratory system carries out respiratory gaseous exchange. [GOC:dph] http://amigo.geneontology.org/amigo/term/GO:0060541 2025.1.Hs down
GOBP_CARBOHYDRATE_DERIVATIVE_CATABOLIC_PROCESS GO:1901136 M11157 84 -0.33618305073744587 -1.261927894914182 0.12085769980506822 0.8143373493975903 GAPDH	CD44	DDIT4	HIF1A	NUDT4	TPI1	HK1	CST3	GPI	PDE5A	APP	ENO1	ALDOA	EDEM2	TGFB1	SUMF1	GLB1	SAMHD1	PPARA	COL6A1	PDE7B	STAT3	EP300	EDEM1	PSEN1 The chemical reactions and pathways resulting in the breakdown of carbohydrate derivative. [GOC:TermGenie] http://amigo.geneontology.org/amigo/term/GO:1901136 2025.1.Hs down
GOBP_PURINE_NUCLEOTIDE_CATABOLIC_PROCESS GO:0006195 M49333 57 -0.357094231544269 -1.2436811815856907 0.12475633528265107 0.8143373493975903 GAPDH	DDIT4	HIF1A	NUDT4	TPI1	HK1	GPI	PDE5A	APP	ENO1	ALDOA	SAMHD1	PPARA	COL6A1	PDE7B	STAT3	EP300 The chemical reactions and pathways resulting in the breakdown of a purine nucleotide	a compound consisting of nucleoside (a purine base linked to a deoxyribose or ribose sugar) esterified with a phosphate group at either the 3' or 5'-hydroxyl group of the sugar. [GOC:go_curators	ISBN:0198506732] http://amigo.geneontology.org/amigo/term/GO:0006195 2025.1.Hs down
GOBP_SENSORY_ORGAN_MORPHOGENESIS GO:0090596 M15276 87 0.3245722576713852 1.2435155227075567 0.12396694214876033 0.8143373493975903 COL5A1	BCAR3	PRRX1	ZEB1	SCRIB	STAU2	PHACTR4	PTPRM	AHI1	FGFR1	SKI	LRP5	PRKCI	BAX	TTC39C	WDPCP	CHD7 Morphogenesis of a sensory organ. A sensory organ is defined as a tissue or set of tissues that work together to receive and transmit signals from external or internal stimuli. Morphogenesis is the process in which anatomical structures are generated and organized. Organs are commonly observed as visibly distinct structures	but may also exist as loosely associated clusters of cells that work together to perform a specific function or functions. [GOC:kmv	ISBN:978-0199210893] http://amigo.geneontology.org/amigo/term/GO:0090596 2025.1.Hs up
GOBP_RRNA_METABOLIC_PROCESS GO:0016072 M3080 104 -0.3123219268271716 -1.2264866168887398 0.11842105263157894 0.8143373493975903 RPS6	RPL5	RPL11	RPS21	NOL10	RPL7A	RPS27	RPS19	RPL35A	RPL27	DDX17	RPS16	EIF4A3	RPS14	ERCC2	BRIX1 The chemical reactions and pathways involving rRNA	ribosomal RNA	a structural constituent of ribosomes. [ISBN:0198506732] http://amigo.geneontology.org/amigo/term/GO:0016072 2025.1.Hs down
GOBP_POSITIVE_REGULATION_OF_CYTOKINE_PRODUCTION GO:0001819 M11373 119 -0.30090837300976614 -1.2111432126180555 0.12167300380228137 0.8143373493975903 GAPDH	CREB1	HSP90AA1	HIF1A	HSPB1	HK1	THBS1	IRAK3	SLAMF6	PTPN11	MAPKAPK2	APP	IL27RA	EIF2AK3	CD276	STAT5B	RPS3	USP22	TGFB1	TLR1	TYK2	RUNX1	STAT3	PSEN1	CD226	PIK3R1	LILRA5	NFAM1	TANK	PIK3CG	RTN4 Any process that activates or increases the frequency	rate or extent of production of a cytokine. [GOC:add	ISBN:0781735149] http://amigo.geneontology.org/amigo/term/GO:0001819 2025.1.Hs down
GOBP_SIGNAL_RELEASE GO:0023061 M13839 146 -0.2899987461681313 -1.1991487750800152 0.1180952380952381 0.8143373493975903 MCTP2	RPH3AL	CREB1	PER2	STX1A	HIF1A	PPT1	PPP3CB	PTPN11	RAB11FIP3	ABCC4	TGM2	STXBP1	ITPR1	SNX19	CPT1A	WLS	PIP5K1C	PRKCA	BRAF	UNC13B	PLA2G4A	STXBP5	RFX3	ATP2A2	RAB11FIP1	VPS35	PSEN1	OSBPL2	AP2B1	NF1	RAC1	PINK1	IL1RN	GNAI1	RAB5A	PRKCB	EFR3A	PPFIA2	DYNLL1	FBXO45	MEF2C	LRRK2	PFKL	RIMS2	ACVR2B	CACNA1B	GLUD1	SYN3	SYK The process in which a signal is secreted or discharged into the extracellular medium from a cellular source. [GOC:mtg_signal] http://amigo.geneontology.org/amigo/term/GO:0023061 2025.1.Hs down
GOBP_REGULATION_OF_HORMONE_LEVELS GO:0010817 M11178 122 -0.297878365150735 -1.197438917990474 0.1262135922330097 0.8143373493975903 RPH3AL	CREB1	PER2	STX1A	HIF1A	ECE1	PPP3CB	PTPN11	RAB11FIP3	DHRS3	P4HB	STAT5B	ITPR1	POR	SNX19	CYP2S1	CPT1A Any process that modulates the levels of hormone within an organism or a tissue. A hormone is any substance formed in very small amounts in one specialized organ or group of cells and carried (sometimes in the bloodstream) to another organ or group of cells in the same organism	upon which it has a specific regulatory action. [GOC:BHF	GOC:dph	GOC:tb] http://amigo.geneontology.org/amigo/term/GO:0010817 2025.1.Hs down
GOBP_VESICLE_ORGANIZATION GO:0016050 M10786 166 -0.2825436087601216 -1.1805624608200143 0.11776061776061776 0.8143373493975903 MX1	UVRAG	RPH3AL	CREB1	STX1A	VAPB	SEC23A	STX5	RAB2A	CHMP4A	SRGN	TRAPPC4	SEC24A	CHMP5	STXBP1	USO1	AP3S1	UBR4	SNX19	DCAF17	VPS11	HPS4	TRAPPC9	EPS15	ATP6V1E1	AP1B1	AGFG1	ZDHHC20	SEC13	VAPA	ATP6V0B	VTI1B	RAB7A	KIAA0319L	MVB12B	TFG	ANXA8	PREB	PIP4K2A	ARL8B	PDCD6IP	GBF1	AP3D1	CHMP3	RFX2	GOLPH3L A process that is carried out at the cellular level which results in the assembly	arrangement of constituent parts	or disassembly of a vesicle. [GOC:mah] http://amigo.geneontology.org/amigo/term/GO:0016050 2025.1.Hs down
GOBP_SYNAPSE_ORGANIZATION GO:0050808 M221 196 -0.2738356976839383 -1.1785894115366733 0.11545988258317025 0.8143373493975903 CAST	FNTA	ACTB	SIPA1L1	CAPRIN1	SSH1	PUM2	ROBO2	NEDD8	CAP1	NPTN	KIF5B	ERC1	PRNP	PPFIA1	LGMN	APP	CHCHD10	YWHAZ	FARP1	DOCK1	ETV5	VCP	ENAH	CYFIP1	CRKL	PRKCA	TANC2	GPHN	PDLIM5	STK38	NEDD4L	PTPRS	GRN	BAIAP2	RHOA	SRGAP2	DLGAP4	VPS35	ACTG1	PSEN1	AGAP1	NF1	NFIA	PPFIBP2	DLG5	ABI2	RTN4	RAC1	PTPN13
GOBP_CELL_MORPHOGENESIS_INVOLVED_IN_NEURON_DIFFERENTIATION GO:0048667 M46815 232 -0.26794093118318735 -1.174516388678719 0.1188118811881188 0.8143373493975903 FN1	SEMA4G	CREB1	FAT3	ACTB	SIPA1L1	CUX1	CAPRIN1	ECE1	PITPNA	PPP3CB	EXT1	PTPN11	ROBO2	CNP	SEMA3C	NOTCH3	NPTN	KIF5B	STXBP1	APP	APLP2	VCL	PAK2	SLIT3	PTN	FARP1	UST	MAP2K2	BMPR2	ENAH	CYFIP1	PALLD	PRKCA	NTN4	TANC2	MARK2	UNC5D	BRAF	PDLIM5	TIAM2	NEDD4L	ULK2	LIMK1	PTPRS The process in which the structures of a neuron are generated and organized. This process occurs while the initially relatively unspecialized cell is acquiring the specialized features of a neuron. [GOC:dph	GOC:tb] http://amigo.geneontology.org/amigo/term/GO:0048667 2025.1.Hs down
GOBP_PROTEIN_MATURATION GO:0051604 M12410 212 -0.26938995484836126 -1.1696824444163276 0.12248995983935743 0.8143373493975903 FNTA	RPS6KA2	GALNT2	HSP90AA1	HSPB1	ECE1	THBS1	ST13	SEC11A	CCT6B	PITRM1	PPIA	LONP2	PFDN2	METAP2	SRGN	PRNP	FKBP5	P4HB	LGMN	AHSA1	BOLA2	NUDC	ADAM9	ENO1	INPP5B	DYNC2H1	HSPA4	PIGL	HSP90AB1	LMF2	ATF6	DNAJC7	PGAP1	IFT172	UGGT1	LYRM7	TTC1	SPPL3	VAPA	CDC123	PDIA4	RUNX1	CPD	LMAN2L	PIGP	GRN	CCT6A	EP300	PDIA6
GOBP_REGULATION_OF_CATALYTIC_ACTIVITY GO:0050790 M45888 214 -0.2684953938180066 -1.1667969816242525 0.126 0.8143373493975903 TIMP1	UVRAG	CEP85	GAPDH	CDK5RAP1	RPL5	SIPA1L1	RPL11	CHP1	RPS2	RSU1	PPIA	PHB2	RALGAPA2	FBN1	RGS10	MMD	CAP1	CACNA1C	BCR	TGM2	SYAP1	TOM1L1	PAK2	RANGAP1	RAPGEF1	RPS3	MAP2K2	VCP	MAP3K4	GPR137B	GNAI2	FGD1	STK38	SNX9	CDC14B	GRN	NDEL1	RHOA	CDC25A	SRGAP2	ADAR	AKT1S1	EPM2A	DDR2	NF1	ECSIT	LILRA5	UBE2S	LIMS1
GOBP_CELL_JUNCTION_ORGANIZATION GO:0034330 M12450 302 -0.25653453153384126 -1.1574169134852905 0.12133072407045009 0.8143373493975903 FN1	CAST	RPS6	ARHGAP6	FNTA	ACTB	SIPA1L1	LAMC1	CAPRIN1	THBS1	SSH1	ITGB4	EXT1	PUM2	TLN1	ROBO2	NEDD8	CAP1	BCR	NPTN	KIF5B	ERC1	SPECC1L	PRNP	PPFIA1	LGMN	APP	CHCHD10	VCL	PAK2	YWHAZ	RAPGEF1	FARP1	ITGA5	CCM2	DOCK1	ETV5	PIP5K1C	VCP	ENAH	CYFIP1	CRKL	TGFB1	PRKCA	TANC2	JUP	HIPK1	GPHN	PDLIM5	NF2
GOBP_REGULATION_OF_ORGANELLE_ORGANIZATION GO:0033043 M5517 493 0.23599250535613894 1.1128195243750165 0.12449799196787148 0.8143373493975903 PTK2	DLG1	CNOT6L	FERMT2	SQSTM1	TOM1L2	POC1B	CCL24	NSMCE4A	ANKRD27	STAU2	PGAM5	CNOT1	MTCH2	ATXN7	CLSTN3	TBC1D14	MID1	KNTC1	TMEM135	CLASP1	FLNA	SKA3	NEK7	TBCD	SEMA5A	STIL	TBC1D3	CNOT2	NUSAP1	TBC1D4	CNOT6	ABL2	USP10	SSH2	BUB1B	ANAPC1	CALR	CCT3	MMP9	HAUS6	PAN3	MET	TACC3	NAV3	SMARCC1	SDC4	SLIT2	FGFR1	CAMSAP1
GOBP_INTRINSIC_APOPTOTIC_SIGNALING_PATHWAY_IN_RESPONSE_TO_ENDOPLASMIC_RETICULUM_STRESS GO:0070059 M16339 18 -0.5007216492509223 -1.3614870185542183 0.13147410358565736 0.8176374523679913 CREB3L1	APP	SERINC3	EIF2AK3	ITPR1	GRINA	MAP3K5	ATP2A3 The series of molecular signals in which an intracellular signal is conveyed to trigger the apoptotic death of a cell. The pathway is induced in response to a stimulus indicating endoplasmic reticulum (ER) stress	and ends when the execution phase of apoptosis is triggered. ER stress usually results from the accumulation of unfolded or misfolded proteins in the ER lumen. [GOC:mah	GOC:mtg_apoptosis	PMID:18701708] http://amigo.geneontology.org/amigo/term/GO:0070059 2025.1.Hs down
GOBP_INTRACILIARY_TRANSPORT GO:0042073 M23499 19 -0.4863286046053163 -1.3391785226760031 0.1312127236580517 0.8176374523679913 SSX2IP	DYNC2H1	IFT172	IFT46	IFT122	WDR19	DYNLL1	ARL3	IFT88	DYNC2LI1	RABL2B The bidirectional movement of large protein complexes along microtubules within a cilium	mediated by motor proteins. [GOC:cilia	GOC:kmv	PMID:17981739	PMID:18180368	PMID:22869374] http://amigo.geneontology.org/amigo/term/GO:0042073 2025.1.Hs down
GOBP_NEGATIVE_REGULATION_OF_OSSIFICATION GO:0030279 M15467 17 -0.4980862901478982 -1.3390127734940018 0.1282565130260521 0.8176374523679913 HIF1A	RBPJ	SRGN	LTBP3	TGFB1 Any process that stops	prevents	or reduces the frequency	rate or extent of ossification	the formation of bone or of a bony substance or the conversion of fibrous tissue or of cartilage into bone or a bony substance. [GOC:go_curators] http://amigo.geneontology.org/amigo/term/GO:0030279 2025.1.Hs down
GOBP_POSITIVE_REGULATION_OF_RNA_SPLICING GO:0033120 M10625 22 0.45919391912074614 1.3318894273298307 0.1303501945525292 0.8176374523679913 POLR2A	DAZAP1	NUP98	TRA2B	HABP4	DYRK1A Any process that activates or increases the frequency	rate or extent of RNA splicing. [GOC:mah] http://amigo.geneontology.org/amigo/term/GO:0033120 2025.1.Hs up
GOBP_UNSATURATED_FATTY_ACID_METABOLIC_PROCESS GO:0033559 M15568 25 0.4518452186280487 1.3278612391235722 0.13026052104208416 0.8176374523679913 FADS2	SCD	TMEM135	DAGLB	ABHD6	PTGES3	PTGR1	FADS1 The chemical reactions and pathways involving an unsaturated fatty acid	any fatty acid containing one or more double bonds between carbon atoms. [GOC:mah] http://amigo.geneontology.org/amigo/term/GO:0033559 2025.1.Hs up
GOBP_FIBROBLAST_MIGRATION GO:0010761 M22676 24 0.4574933614486514 1.3266663285081475 0.12955465587044535 0.8176374523679913 PTK2	CORO1C	PLEC	SDC4	FUT8	PIP5K1A	WDPCP Cell migration that is accomplished by extension and retraction of a fibroblast pseudopodium. A fibroblast is a connective tissue cell which secretes an extracellular matrix rich in collagen and other macromolecules. [GOC:BHF	GOC:dph	GOC:tb] http://amigo.geneontology.org/amigo/term/GO:0010761 2025.1.Hs up
GOBP_REGULATION_OF_CARDIAC_MUSCLE_CONTRACTION GO:0055117 M15697 24 0.455399146268953 1.320593399373703 0.13157894736842105 0.8176374523679913 DLG1	ASPH	FKBP1A	PDE4D	PDE4B	JPH1 Any process that modulates the frequency	rate or extent of cardiac muscle contraction. [GOC:ecd] http://amigo.geneontology.org/amigo/term/GO:0055117 2025.1.Hs up
GOBP_NEGATIVE_REGULATION_OF_SMALL_MOLECULE_METABOLIC_PROCESS GO:0062014 M24325 34 -0.41546373161721134 -1.301795773048225 0.1277445109780439 0.8176374523679913 DDIT4	USP7	UBR4	LEPR	NFKB1	ANGPTL4	PPARA	ATP2B4	STAT3	EP300	DCAF5	CLK2	PLEK	NCOR1	KAT2A	PRKG1	ACACB Any process that stops	prevents or reduces the frequency	rate or extent of a small molecule metabolic process. [GOC:vw] http://amigo.geneontology.org/amigo/term/GO:0062014 2025.1.Hs down
GOBP_SMAD_PROTEIN_SIGNAL_TRANSDUCTION GO:0060395 M10081 34 -0.41338885487749055 -1.2952944455825266 0.1317365269461078 0.8176374523679913 WWTR1	RBPMS	RUNX2	OVOL2	HIPK2	SMAD1	BMPR2	CRKL	TGFB1	TGFBR1 An intracellular signaling cassette that starts with the activation of a SMAD protein	leading to the formation of a complex with co-SMADs	which translocates to the nucleus and regulates transcription of specific target genes. [GOC:BHF] http://amigo.geneontology.org/amigo/term/GO:0060395 2025.1.Hs down
GOBP_PYRUVATE_METABOLIC_PROCESS GO:0006090 M15816 53 -0.3671071606956491 -1.2601774439155577 0.130859375 0.8176374523679913 GAPDH	DDIT4	HIF1A	TPI1	HK1	VDAC1	GPI	ME2	APP	ENO1	ALDOA	LDHB	ME1	PPARA	COL6A1	STAT3	EP300	PSEN1 The chemical reactions and pathways involving pyruvate	2-oxopropanoate. [GOC:go_curators] http://amigo.geneontology.org/amigo/term/GO:0006090 2025.1.Hs down
GOBP_SINGLE_FERTILIZATION GO:0007338 M10123 39 0.389142024650155 1.2598883146330713 0.12989690721649486 0.8176374523679913 MYH9	POC1B	UBE3A	ASH1L	CCT3	TUBGCP3	ABHD2	TPST2 The union of male and female gametes to form a zygote. [GOC:ems	GOC:mtg_sensu] http://amigo.geneontology.org/amigo/term/GO:0007338 2025.1.Hs up
GOBP_POSITIVE_REGULATION_OF_NEUROGENESIS GO:0050769 M40461 86 -0.3260967457940348 -1.236702583185317 0.13051823416506717 0.8176374523679913 FN1	DICER1	HIF1A	CUX1	CAPRIN1	ROBO2	NPTN	NAP1L1	TGM2	PTN	MAP2K2	BMPR2	ETV5	VEGFC	TGFB1	BRAF	TIAM2	LIMK1	WDR62	BAIAP2	ZFYVE27 Any process that activates or increases the frequency	rate or extent of neurogenesis	the generation of cells within the nervous system. [GOC:ai] http://amigo.geneontology.org/amigo/term/GO:0050769 2025.1.Hs down
GOBP_REGULATION_OF_RESPONSE_TO_STRESS GO:0080134 M13345 485 0.23705573693572066 1.113875090046287 0.12955465587044535 0.8176374523679913 PTPRF	PTK2	FERMT2	SQSTM1	FADS2	ETS1	CREBBP	ACTR2	PRRX1	RNF216	NEAT1	CCL24	EXTL3	DHX33	MTCH2	ATXN7	CADM4	LAMP1	LDLR	INPP5D	MID1	FXR1	CLASP1	UBQLN1	PRKAR1B	NCR1	NEK7	ERCC6	BABAM1	AKT3	ASH1L	TMX1	PRKDC	DDX5	USP25	LRP8	SPIDR	MMP9	DAGLB	HELQ	PPP2R3C	RREB1	ADAMTS12	PPP3CA	SETD2	CHCHD2	SMARCC1	ZC3HAV1	CCDC134	IFNLR1
GOBP_UBIQUITIN_DEPENDENT_PROTEIN_CATABOLIC_PROCESS_VIA_THE_MULTIVESICULAR_BODY_SORTING_PATHWAY GO:0043162 M15937 16 -0.5135308907640551 -1.349886692948974 0.13226452905811623 0.8186592966152084 CHMP4A	CHMP5	TOM1L1	MVB12B	CHMP3	VPS37A The chemical reactions and pathways resulting in the breakdown of a protein or peptide covalently tagged with ubiquitin	via the multivesicular body (MVB) sorting pathway; ubiquitin-tagged proteins are sorted into MVBs	and delivered to a lysosome/vacuole for degradation. [GOC:jl	PMID:11511343] http://amigo.geneontology.org/amigo/term/GO:0043162 2025.1.Hs down
GOBP_NEGATIVE_REGULATION_OF_SMOOTHENED_SIGNALING_PATHWAY GO:0045879 M13653 20 -0.4733528260511636 -1.3069433003281052 0.13306451612903225 0.8213543968183826 UBR5	RUNX2	NCOA2	SUFU	VCP	IFT172	IFT122	KIF7 Any process that stops	prevents	or reduces the frequency	rate or extent of smoothened signaling. [GOC:go_curators] http://amigo.geneontology.org/amigo/term/GO:0045879 2025.1.Hs down
GOBP_REGULATION_OF_VASOCONSTRICTION GO:0019229 M14342 15 -0.5216943767884353 -1.3547397201382276 0.14087301587301587 0.8221227528158221 ATP2B1	PER2	ECE1 Any process that modulates the frequency	rate or extent of reductions in the diameter of blood vessels. [GOC:jl] http://amigo.geneontology.org/amigo/term/GO:0019229 2025.1.Hs down
GOBP_XENOBIOTIC_METABOLIC_PROCESS GO:0006805 M3609 18 -0.4900582479380142 -1.3324927010868641 0.1394422310756972 0.8221227528158221 ABCC4	ABCC1	GSTP1	POR	CYP2S1	CAD	ABCC5	ADA	ABCC3 The chemical reactions and pathways involving a xenobiotic compound	a compound foreign to the organism exposed to it. It may be synthesized by another organism (like ampicilin) or it can be a synthetic chemical. [GOC:cab2	GOC:krc] http://amigo.geneontology.org/amigo/term/GO:0006805 2025.1.Hs down
GOBP_MULTICELLULAR_ORGANISMAL_MOVEMENT GO:0050879 M11399 23 -0.4579101849307273 -1.3205885967593847 0.13861386138613863 0.8221227528158221 HSP90AA1	RCSD1	ITPR1	EEF2	HIPK2	COL6A1	VPS35	MYH14 Any physiological process involved in changing the position of a multicellular organism or an anatomical part of a multicellular organism. [GOC:dph	GOC:mtg_muscle	GOC:tb] http://amigo.geneontology.org/amigo/term/GO:0050879 2025.1.Hs down
GOBP_PROGRAMMED_NECROTIC_CELL_DEATH GO:0097300 M24757 15 0.5044271310082948 1.316579014972252 0.13453815261044177 0.8221227528158221 CFLAR	PGAM5	ARHGEF2	BAX A necrotic cell death process that results from the activation of endogenous cellular processes	such as signaling involving death domain receptors or Toll-like receptors. [GOC:mtg_apoptosis	PMID:21760595] http://amigo.geneontology.org/amigo/term/GO:0097300 2025.1.Hs up
GOBP_NEUROMUSCULAR_JUNCTION_DEVELOPMENT GO:0007528 M10077 23 -0.45467681605414595 -1.3112637330458246 0.1405940594059406 0.8221227528158221 FNTA	FARP1	ETV5	CRKL	GPHN	NEDD4L	PPFIBP2	RAC1 A process that is carried out at the cellular level which results in the assembly	arrangement of constituent parts	or disassembly of a neuromuscular junction. [GOC:mtg_OBO2OWL_2013] http://amigo.geneontology.org/amigo/term/GO:0007528 2025.1.Hs down
GOBP_CELLULAR_RESPONSE_TO_FLUID_SHEAR_STRESS GO:0071498 M10935 19 0.471877298945268 1.3105382834467347 0.13827655310621242 0.8221227528158221 PTK2	PLEC	ABL1	MTSS1	PTK2B	SREBF2	HAS2	PDPK1 Any process that results in a change in state or activity of a cell (in terms of movement	secretion	enzyme production	gene expression	etc.) as a result of a fluid shear stress stimulus. Fluid shear stress is the force acting on an object in a system where the fluid is moving across a solid surface. [GOC:mah] http://amigo.geneontology.org/amigo/term/GO:0071498 2025.1.Hs up
GOBP_REGULATION_OF_TRANSCRIPTION_BY_RNA_POLYMERASE_I GO:0006356 M22400 26 0.44115681961856984 1.3054075966371974 0.1375770020533881 0.8221227528158221 CREBBP	DHX33	FLNA	ERCC6 Any process that modulates the frequency	rate or extent of transcription mediated by RNA polymerase I. [GOC:go_curators] http://amigo.geneontology.org/amigo/term/GO:0006356 2025.1.Hs up
GOBP_ENDOCRINE_PROCESS GO:0050886 M16557 20 -0.47230057308654877 -1.3040379939970408 0.13911290322580644 0.8221227528158221 RPS6KA2	ECE1	PTPN11	RAB11FIP3 The process that involves the secretion of or response to endocrine hormones. An endocrine hormone is a hormone released into the circulatory system. [ISBN:0721662544] http://amigo.geneontology.org/amigo/term/GO:0050886 2025.1.Hs down
GOBP_KERATINIZATION GO:0031424 M15449 15 0.49832736838136166 1.3006583418417654 0.142570281124498 0.8221227528158221 KRT5	KRT7	KAZN	KRT6A	PPHLN1	PPL The process in which the cytoplasm of the outermost cells of the vertebrate epidermis is replaced by keratin. Keratinization occurs in the stratum corneum	feathers	hair	claws	nails	hooves	and horns. [GOC:dph	GOC:ebc	GOC:sdb_2009	GOC:tb] http://amigo.geneontology.org/amigo/term/GO:0031424 2025.1.Hs up
GOBP_REGULATION_OF_CHONDROCYTE_DIFFERENTIATION GO:0032330 M13341 23 -0.45036178287274886 -1.2988194070589427 0.14653465346534653 0.8221227528158221 EFEMP1	PTPN11	AXIN2	RUNX2	LTBP3	POR	ZBTB16	PKDCC	TGFBR1	PRKG2	TRPS1 Any process that modulates the frequency	rate or extent of chondrocyte differentiation. [GOC:mah] http://amigo.geneontology.org/amigo/term/GO:0032330 2025.1.Hs down
GOBP_REGULATION_OF_SODIUM_ION_TRANSPORT GO:0002028 M11902 24 0.4475817560934335 1.2979240686323077 0.1437246963562753 0.8221227528158221 ACTN4	DLG1	MLLT6 Any process that modulates the frequency	rate or extent of the directed movement of sodium ions (Na+) into	out of or within a cell	or between cells	by means of some agent such as a transporter or pore. [GOC:dph] http://amigo.geneontology.org/amigo/term/GO:0002028 2025.1.Hs up
GOBP_NEGATIVE_REGULATION_OF_EPITHELIAL_CELL_DIFFERENTIATION GO:0030857 M14860 15 0.4972309074596498 1.2977965262265398 0.142570281124498 0.8221227528158221 ZEB1	EXTL3	MMP9	CCND1 Any process that stops	prevents	or reduces the frequency	rate or extent of epithelial cell differentiation. [GOC:mah] http://amigo.geneontology.org/amigo/term/GO:0030857 2025.1.Hs up
GOBP_SOMITOGENESIS GO:0001756 M13075 22 -0.4613187718238487 -1.2935447425070257 0.13934426229508196 0.8221227528158221 NCKAP1	RBPJ	SEMA3C	AXIN2	ATM The formation of mesodermal clusters that are arranged segmentally along the anterior posterior axis of an embryo. [ISBN:0721662544] http://amigo.geneontology.org/amigo/term/GO:0001756 2025.1.Hs down
GOBP_NADP_METABOLIC_PROCESS GO:0006739 M10730 20 -0.46773881583916627 -1.2914428266206759 0.14516129032258066 0.8221227528158221 TALDO1	ME2	ME1	PGLS	MDH1	TP53I3	PC	TKT	ACO1	ACACB	G6PD The chemical reactions and pathways involving nicotinamide adenine dinucleotide phosphate (NADP+)	a coenzyme that interconverts with its reduced form	NADPH	in many redox and biosynthetic reactions. [GOC:mah] http://amigo.geneontology.org/amigo/term/GO:0006739 2025.1.Hs down
GOBP_POSITIVE_REGULATION_OF_GLIOGENESIS GO:0014015 M16883 21 -0.4619961713989646 -1.2899709762431084 0.145748987854251 0.8221227528158221 DICER1	PTN	ETV5	VEGFC	TGFB1 Any process that activates or increases the frequency	rate or extent of gliogenesis	the formation of mature glia. [GOC:ef] http://amigo.geneontology.org/amigo/term/GO:0014015 2025.1.Hs down
GOBP_MATURATION_OF_SSU_RRNA GO:0030490 M10864 22 -0.45674347120024883 -1.2807155310625224 0.14754098360655737 0.8221227528158221 RPS21	NOL10	RPS19	RPS16	RPS14	ERCC2 Any process involved in the maturation of a precursor Small SubUnit (SSU) ribosomal RNA (rRNA) molecule into a mature SSU-rRNA molecule. [GOC:curators] http://amigo.geneontology.org/amigo/term/GO:0030490 2025.1.Hs down
GOBP_MOLTING_CYCLE GO:0042303 M13884 40 -0.3912263338636459 -1.276456040122722 0.14538310412573674 0.8221227528158221 EXT1	PUM2	RBPJ	NOM1	TERT	ERCC2	COL6A1	NF1	IGFBP5	CD109	LDB2	PPP1R13L	NSUN2	KRT17 The periodic casting off and regeneration of an outer covering of cuticle	feathers	hair	horns	skin	etc. [GOC:jl	ISBN:0198506732] http://amigo.geneontology.org/amigo/term/GO:0042303 2025.1.Hs down
GOBP_REGULATION_OF_CELLULAR_RESPONSE_TO_INSULIN_STIMULUS GO:1900076 M15871 36 -0.39844123483323574 -1.2759920109032215 0.14807692307692308 0.8221227528158221 ATP2B1	SNX5	PTPN11	NCOA2	USO1	PIP4K2A	GRB10	PRKCB	KANK1	TSC2	MYO1C	KBTBD2	RPS6KB1	TNS2 Any process that modulates the frequency	rate or extent of cellular response to insulin stimulus. [GOC:TermGenie	GOC:yaf] http://amigo.geneontology.org/amigo/term/GO:1900076 2025.1.Hs down
GOBP_CARDIAC_MUSCLE_CONTRACTION GO:0060048 M24087 40 0.3860311007898922 1.2609255052512045 0.1359026369168357 0.8221227528158221 DLG1	ASPH	FLNA	FKBP1A	PDE4D	PDE4B	JPH1 Muscle contraction of cardiac muscle tissue. [GOC:dph] http://amigo.geneontology.org/amigo/term/GO:0060048 2025.1.Hs up
GOBP_CARDIAC_CHAMBER_MORPHOGENESIS GO:0003206 M10631 44 -0.37678410325673556 -1.2600505545470477 0.1485148514851485 0.8221227528158221 HIF1A	RBPJ	ROBO2	SEMA3C	DHRS3	FHL2	OVOL2	SLIT3	BMPR2	TGFB1	TGFBR1 The process in which a cardiac chamber is generated and organized. A cardiac chamber is an enclosed cavity within the heart. [GOC:mtg_heart] http://amigo.geneontology.org/amigo/term/GO:0003206 2025.1.Hs down
GOBP_SYNAPTIC_VESICLE_RECYCLING GO:0036465 M11777 45 -0.3772676658336369 -1.2559650593215703 0.14570858283433133 0.8221227528158221 MX1	ACTB	STX1A	PPP3CB	AP3S1	CLTA	PIP5K1C	AP2A2	RAB7A	SNX9	ACTG1	AP2B1	AP3D1	CAPN2	RAC1	RAB5A	DNM2	EPS15L1	LRRK2	GIT2	STON2 The trafficking of synaptic vesicles from the pre-synaptic membrane so the vesicle can dock and prime for another round of exocytosis and neurotransmitter release. Recycling occurs after synaptic vesicle exocytosis	and is necessary to replenish presynaptic vesicle pools	sustain transmitter release and preserve the structural integrity of the presynaptic membrane. Recycling can occur following transient fusion with the presynaptic membrane (kiss and run)	or via endocytosis of presynaptic membrane. [GOC:bf	GOC:pad	GOC:PARL	PMID:15217342	PMID:22026965	PMID:23245563] http://amigo.geneontology.org/amigo/term/GO:0036465 2025.1.Hs down
GOBP_FERTILIZATION GO:0009566 M15335 49 0.36826532397271405 1.2548929545777139 0.1413934426229508 0.8221227528158221 MYH9	POC1B	UBE3A	ASH1L	CCT3	TUBGCP3	ABHD2	TPST2	ZFY	BAX The union of gametes of opposite sexes during the process of sexual reproduction to form a zygote. It involves the fusion of the gametic nuclei (karyogamy) and cytoplasm (plasmogamy). [GOC:tb	ISBN:0198506732] http://amigo.geneontology.org/amigo/term/GO:0009566 2025.1.Hs up
GOBP_REGULATION_OF_OSTEOBLAST_DIFFERENTIATION GO:0045667 M14392 53 0.3604489457557265 1.2517792153256029 0.13673469387755102 0.8221227528158221 CRIM1	PTK2	FERMT2	DDX5	PPP3CA	SKI	GSK3B	LRP5	RASSF2	ACVR2A Any process that modulates the frequency	rate or extent of osteoblast differentiation. [GOC:go_curators] http://amigo.geneontology.org/amigo/term/GO:0045667 2025.1.Hs up
GOBP_POSITIVE_REGULATION_OF_ORGANELLE_ASSEMBLY GO:1902117 M16790 42 0.37882051953873436 1.2513822275441766 0.13883299798792756 0.8221227528158221 CNOT6L	POC1B	CNOT1	STIL	CNOT2	CNOT6	PAN3	SDC4	GSK3B	HTT Any process that activates or increases the frequency	rate or extent of organelle assembly. [GOC:pr	GOC:TermGenie] http://amigo.geneontology.org/amigo/term/GO:1902117 2025.1.Hs up
GOBP_POSITIVE_REGULATION_OF_DEVELOPMENTAL_GROWTH GO:0048639 M13900 58 -0.350828873957634 -1.226999551453955 0.14478764478764478 0.8221227528158221 FN1	CREB1	PUM2	RBPJ	YAP1	STAT5B	BBS2	BMPR2	NEDD4L	LIMK1 Any process that activates	maintains or increases the rate of developmental growth. [GOC:go_curators] http://amigo.geneontology.org/amigo/term/GO:0048639 2025.1.Hs down
GOBP_CARBOHYDRATE_BIOSYNTHETIC_PROCESS GO:0016051 M3786 58 -0.35042969630583526 -1.2256034554194914 0.14478764478764478 0.8221227528158221 PER2	TPI1	EXT1	GPI	USP7	ENO1	LEPR	NFKB1	MDH2	SLC25A13	TGFB1	NNMT	PPARA	EP300	ST8SIA6	EPM2A	CLK2	UGP2	GRB10	PLEK	PC The chemical reactions and pathways resulting in the formation of carbohydrates	any of a group of organic compounds based of the general formula Cx(H2O)y. [ISBN:0198506732] http://amigo.geneontology.org/amigo/term/GO:0016051 2025.1.Hs down
GOBP_DEVELOPMENTAL_GROWTH_INVOLVED_IN_MORPHOGENESIS GO:0060560 M15682 86 -0.3226307003425098 -1.2235578112161847 0.1401151631477927 0.8221227528158221 FN1	PPP3CB	EXT1	PUM2	DDR1	YAP1	APP	CPNE1	VCL	SLIT3	BMPR2	CYFIP1	TGFB1	NEDD4L	ULK2	LIMK1	PTPRS	SPAG9	NDEL1	ZFYVE27	SPG21	RTN4	SIN3A	SLC23A2	DNM2	TRPV2	USP9X	PLXNA1	RIMS2	PRKG1	EIF2AK4 The increase in size or mass of an anatomical structure that contributes to the structure attaining its shape. [GOC:dph] http://amigo.geneontology.org/amigo/term/GO:0060560 2025.1.Hs down
GOBP_RESPONSE_TO_ALCOHOL GO:0097305 M16155 86 -0.32069877254789786 -1.2162310895455761 0.1420345489443378 0.8221227528158221 RPS6	CREB1	RPL10A	FKBP5	GSTP1	GRAMD1B	GNB1	SLIT3	EEF2	CPT1A	GOT2	CBL	TGFB1	PRKCA	JUP	GLB1	SPI1	TGFBR1	MAP4K1	PPARA	CAD	STAT3	DNMT3A	SCNN1A	GNAI1	GOLPH3	SLC23A2	AKAP8	GRAMD1A	ADCY7	USP46	LIPA Any process that results in a change in state or activity of a cell or an organism (in terms of movement	secretion	enzyme production	gene expression	etc.) as a result of an alcohol stimulus. [GOC:pr	PMID:24014527] http://amigo.geneontology.org/amigo/term/GO:0097305 2025.1.Hs down
GOBP_LEUKOCYTE_MIGRATION GO:0050900 M12269 93 -0.31355411301356545 -1.212441882938327 0.13498098859315588 0.8221227528158221 RPL13A	CNN2	THBS1	EXT1	CD99L2	RPS19	PPIA	BCR	P4HB	LGMN	APP	IL27RA	STAT5B	PTN	WNK1	VEGFC	PIP5K1C	CRKL	TGFB1	MYO1G	SPI1	MPP1	PREX1	ICAM1	RHOA	GBF1	PIK3R1	ANO6	NF1	PIK3CG	RTN4	RAC1	GNAI1	GOLPH3	ADA The movement of a leukocyte within or between different tissues and organs of the body. [GOC:add	ISBN:0781735149	PMID:14680625	PMID:14708592	PMID:7507411	PMID:8600538] http://amigo.geneontology.org/amigo/term/GO:0050900 2025.1.Hs down
GOBP_POSITIVE_REGULATION_OF_PROTEOLYSIS GO:0045862 M14936 81 0.3193377717377445 1.2101746156743596 0.1483739837398374 0.8221227528158221 ZYG11B	PTK2	MYH9	ASPH	RHBDD1	UBQLN1	AXIN1	TMX1	FBXW11	DET1	SH3RF2	GSK3B Any process that activates or increases the frequency	rate or extent of the hydrolysis of a peptide bond or bonds within a protein. [GOC:go_curators] http://amigo.geneontology.org/amigo/term/GO:0045862 2025.1.Hs up
GOBP_REGULATION_OF_TRANSMEMBRANE_TRANSPORT GO:0034762 M16782 126 0.29719491336030973 1.1985626954783004 0.13865546218487396 0.8221227528158221 ACTN4	DLG1	ASPH	CEMIP	UBQLN1	FLNA	PTPRM	P2RX1	FKBP1A	MMP9	PPP3CA	UCP2	PDE4D	PDE4B	ABL1	VMP1	CNIH3	JPH1	CNIH2	AHNAK	PRKCI	HTT	AKT2	GRIN2D	BAX	TRPC1	SLMAP	TMSB4X	CHD7	STIM1	WWP2 Any process that modulates the frequency	rate or extent of the directed movement of a solute from one side of a membrane to the other. [GOC:mah] http://amigo.geneontology.org/amigo/term/GO:0034762 2025.1.Hs up
GOBP_GLIOGENESIS GO:0042063 M3208 113 -0.2984263247582569 -1.1862877915826098 0.1374764595103578 0.8221227528158221 DICER1	CREB1	TNFRSF21	VIM	ITGB4	PTPN11	CNP	LAMB1	RNF10	APP	GSTP1	ERCC2	PTN	LEPR	EEF2	MAP2K2	ETV5	VEGFC	CRKL	TGFB1	NF2	EIF2B3	GRB2	COL6A1	GRN	STAT3	RHOA	SRGAP2	PSEN1	EPM2A	NF1	NFIA	DLG5	RTN4 The process that results in the generation of glial cells. This includes the production of glial progenitors and their differentiation into mature glia. [GOC:dgh	GOC:jid] http://amigo.geneontology.org/amigo/term/GO:0042063 2025.1.Hs down
GOBP_REGULATION_OF_ANATOMICAL_STRUCTURE_SIZE GO:0090066 M12279 159 -0.2817179991958396 -1.174644034883001 0.14031620553359683 0.8221227528158221 FN1	ATP2B1	CREB1	PER2	NCKAP1	HSP90AA1	ECE1	SSH1	EXT1	PUM2	HTR7	PTPN11	SPECC1L	GPX1	WNK1	BBS2	BMPR2	CYFIP1	CAPZB	SNX9	ULK2	GRB2	LIMK1	SCARB1	PTPRS	COL6A1	PREX1	BAIAP2	RHOA	ZFYVE27	TMOD3	AKT1S1	PRR16	ANO6	CHMP3	BAIAP2L1	KCNMA1	RTN4	RAC1	CAPG	SLC12A6	PLEK	RAB5A	ADD3	KANK1	SIN3A	DNM2	GCLC	PFN1	TRPV2
GOBP_PROTEIN_LOCALIZATION_TO_NUCLEUS GO:0034504 M16062 162 -0.2787274770868154 -1.1636067682633875 0.1484375 0.8221227528158221 RBM22	EIF4ENIF1	BARD1	HSP90AA1	RPL11	PPP3CB	CHP1	WWTR1	UBR5	POM121	PHB2	JAK1	EI24	E2F3	TNPO3	SUMO3	YAP1	TFRC	YWHAE	APP	CHCHD10	TERT	NUP153	RANGAP1	EIF2AK3	YWHAZ	SUFU	ZBTB16	CIZ1	TGFB1	KAT7	SEC13	JUP	TYK2	NF2	KPNA5	NUP155	STAT3	CCT6A	EP300	ADAR	MARK3	PSEN1	EPM2A	PIK3R1	NF1 A process in which a protein transports or maintains the localization of another protein to the nucleus. [GOC:ecd] http://amigo.geneontology.org/amigo/term/GO:0034504 2025.1.Hs down
GOBP_MORPHOGENESIS_OF_AN_EPITHELIUM GO:0002009 M10083 180 0.27213185457794287 1.1617767719966514 0.13701431492842536 0.8221227528158221 COL5A1	DLG1	FERMT2	SCRIB	PLXND1	C1orf54	PHACTR4	CLASP1	FLNA	MYO9A	STIL	ARHGAP12	HS3ST3A1	STK3	PODXL	MICAL2	AHI1	MET	RREB1	ADAMTS12	MIB1	SDC4	SLIT2	FGFR1	ABL1	SKI	KLHL3	LRP5	FOXP1	CELSR1	MTSS1	TRIM28 The process in which the anatomical structures of epithelia are generated and organized. An epithelium consists of closely packed cells arranged in one or more layers	that covers the outer surfaces of the body or lines any internal cavity or tube. [GOC:dph	GOC:jl	GOC:tb	ISBN:0198506732] http://amigo.geneontology.org/amigo/term/GO:0002009 2025.1.Hs up
GOBP_NEGATIVE_REGULATION_OF_PROTEIN_METABOLIC_PROCESS GO:0051248 M14017 216 -0.26372065460514493 -1.1484778805144342 0.14741035856573706 0.8221227528158221 TIMP1	EIF4ENIF1	CEP85	RPL13A	GAPDH	CDK5RAP1	PER2	EIF3E	RPL5	RPL11	CAMLG	CAPRIN1	THBS1	CST3	CHP1	IRAK3	PPIA	PFDN2	USP7	PRNP	EIF4A3	ENC1	PAK2	EIF2AK1	EIF2AK3	PATL2	NXN	RPS3	WNK1	HIPK2	SUFU	EIF4EBP2	HSP90AB1	CYFIP1	EIF3H	PRKCA	TNRC6C Any process that stops	prevents	or reduces the frequency	rate or extent of chemical reactions and pathways involving a protein. [GOC:ai] http://amigo.geneontology.org/amigo/term/GO:0051248 2025.1.Hs down
GOBP_PROCESS_UTILIZING_AUTOPHAGIC_MECHANISM GO:0061919 M24318 252 -0.25919467814992003 -1.1456594231359585 0.14285714285714285 0.8221227528158221 EEF1A1	UVRAG	GAPDH	FBXW7	SNX5	HSP90AA1	HIF1A	HSPB1	ITGB4	VDAC1	PHB2	EXOC7	EI24	BNIP3L	RAB2A	CHMP4A	TRAPPC4	CHMP5	HUWE1	ATM	PACS2	EIF2AK1	UBR4	CAPNS1	ITPR1	WIPI1	TMEM59	WNK1	LEPR	VPS11	ATF6	ATP6V1E1	VCP	GPR137B	AMBRA1	MARK2	MTMR3	ATP6V0B	VTI1B	RAB7A	ULK2	VPS13D	C6orf89	EIF4G3	COL6A1	KEAP1	ATG3	STAT3	EP300	PIP4K2A
GOBP_RESPONSE_TO_GROWTH_FACTOR GO:0070848 M14540 271 -0.2555238856031178 -1.1413221177155832 0.13372093023255813 0.8221227528158221 EEF1A1	CREB1	FNTA	LTBP1	HTRA1	CD44	CREB3L1	DDIT4	HIF1A	HSPB1	SAP130	THBS1	EXT1	FSTL1	RBPJ	PTPN11	TGFB1I1	MAPKAPK2	FBN1	NPTN	EIF4A3	ITGB5	LGMN	ADAM9	APP	SYAP1	RUNX2	OVOL2	LTBP3	PAK2	GSTP1	STAT5B	RAPGEF1	LPXN	ITGA5	EEF2	HIPK2	SMAD1	HSP90AB1	BMPR2	VEGFC	CBL	CYFIP1	CRKL	TGFB1	LTBP2	SPI1	TGFBR1	PTPRK	GRB2
GOBP_CELL_ACTIVATION GO:0001775 M6709 360 -0.2458115084833214 -1.1304611569113883 0.13565891472868216 0.8221227528158221 FN1	DNASE1	RPL13A	TNFRSF21	MYL9	CD44	ARID1B	ACTB	MLH1	HSPB1	THBS1	PPP3CB	THEMIS2	HDAC5	PAX5	SLAMF6	RBPJ	TLN1	PTPN11	PPIA	PHB2	JAK1	PAG1	BCR	IFNGR2	ITFG2	PRNP	YY1	TFRC	ATM	ALKBH5	STXBP1	ADAM9	APP	RUNX2	IL27RA	VCL	CD276	STAT5B	HMCES	RPS3	LEPR	HSPA12A	ZBTB16	TP53BP1	CBL	GPR137B	TGFB1	KAT7	PRKCA
GOBP_NEGATIVE_REGULATION_OF_PROGRAMMED_CELL_DEATH GO:0043069 M46794 309 -0.248856255554405 -1.1268919066011016 0.14677103718199608 0.8221227528158221 TIMP1	CAST	TPT1	CREB1	CD44	CREB3L1	BARD1	HIF1A	CCND2	PPT1	HSPB1	THBS1	FSTL1	VDAC1	PPIA	PHB2	BNIP3L	ZMYND11	GPI	DAD1	PRNP	YAP1	GPX1	TFRC	FHL2	LGMN	STXBP1	EYA3	TLE1	ENO1	NAA38	IL27RA	TERT	PAK2	GSTP1	YWHAZ	STAT5B	POR	ITGA5	NFKB1	HIPK2	ARHGAP10	HSP90AB1	BFAR	CBL	ANGPTL4	PRKCA	GNAI2	GRK5	CAAP1
GOBP_CELLULAR_RESPONSE_TO_ENDOGENOUS_STIMULUS GO:0071495 M49522 454 -0.23672591804011572 -1.1102424595921618 0.147117296222664 0.8221227528158221 EEF1A1	ATP2B1	CREB1	SNX5	FNTA	LTBP1	HTRA1	CD44	CREB3L1	DDIT4	HIF1A	SAFB	HSPB1	SAP130	THBS1	EXT1	HDAC5	PKD2	BRD8	FSTL1	RBPJ	PTPN11	UBR5	ROBO2	PHB2	JAK1	TGFB1I1	MAPKAPK2	DDX17	FBN1	NR1D2	NPTN	AXIN2	EIF4A3	DHRS3	ITGB5	RAB31	LGMN	ADAM9	APP	SYAP1	RUNX2	OVOL2	LTBP3	NCOA2	PAK2	RANGAP1	USO1	GSTP1	GNB1
GOBP_NEGATIVE_REGULATION_OF_RNA_METABOLIC_PROCESS GO:0051253 M49484 496 0.23403692357199765 1.1030392523204746 0.1483739837398374 0.8221227528158221 CDYL	DLG1	SQSTM1	TAF15	GLIS3	NFATC3	CREBBP	PRRX1	ZEB1	PHC3	ZBTB49	IGF2BP3	CNOT1	SP100	MAP3K10	NFIC	NRIP1	AEBP2	FXR1	KAT6B	XPO1	ZNF148	ATP8B1	ZNF423	FOXK2	FLNA	PRDM11	WWC3	MNT	TRPV1	SOX6	N4BP2L2	CTBP1	L3MBTL4	CNOT2	AXIN1	DDX5	GLIS2	SMURF2	PTBP1	CALR	RERE	HINFP	ZNF85	RREB1	TCFL5	NBAS	JUN	CCND1	DUSP22
GOBP_P_BODY_ASSEMBLY GO:0033962 M10353 17 0.4844269925904183 1.302837386163542 0.14910536779324055 0.8223408882955584 CNOT6L	CNOT1	CNOT2	CNOT6	PAN3	LSM14A	EDC3 The aggregation	arrangement and bonding together of proteins and RNA molecules to form a cytoplasmic mRNA processing body. [GOC:mah	PMID:17429074] http://amigo.geneontology.org/amigo/term/GO:0033962 2025.1.Hs up
GOBP_MALE_GAMETE_GENERATION GO:0048232 M11476 182 0.27016931122522403 1.1543742558279626 0.1492842535787321 0.8223408882955584 CDYL	RAD23B	DAZAP1	POC1B	RHBDD1	TBP	FXR1	CFAP44	SSH2	CCNYL1	CALR	FOXJ3	RAN	TCFL5	CCNY	USP9Y	CREM	ABHD2	FANCA	KATNAL1	SMARCA2	NDRG3	AXL	AFF4	HERC4	SUN1	SBF1	ACVR2A	ZFY	BAX	VPS13B	TTLL5	NUP210L	DMC1	CCNB1	TTLL1 Generation of the male gamete; specialised haploid cells produced by meiosis and along with a female gamete takes part in sexual reproduction. [GOC:dph	GOC:jid] http://amigo.geneontology.org/amigo/term/GO:0048232 2025.1.Hs up
GOBP_CARDIAC_SEPTUM_MORPHOGENESIS GO:0060411 M15683 27 -0.42466620458192483 -1.2689426242146356 0.1515748031496063 0.826871746963833 RBPJ	ROBO2	SEMA3C	DHRS3	SLIT3	BMPR2	TGFBR1 The process in which the anatomical structure of a cardiac septum is generated and organized. A cardiac septum is a partition that separates parts of the heart. [GOC:dph	GOC:mtg_heart] http://amigo.geneontology.org/amigo/term/GO:0060411 2025.1.Hs down
GOBP_NEPHRON_DEVELOPMENT GO:0072006 M15872 51 0.3622597642049189 1.2488530793951755 0.15151515151515152 0.826871746963833 DLG1	ASXL1	CFLAR	HS3ST3A1	PODXL	AHI1	PPP3CA	KLHL3	MTSS1	NUP107	GREB1L The process whose specific outcome is the progression of the nephron over time	from its formation to the mature structure. A nephron is the functional unit of the kidney. [GOC:mtg_kidney_jan10] http://amigo.geneontology.org/amigo/term/GO:0072006 2025.1.Hs up
GOBP_REGULATION_OF_MIRNA_METABOLIC_PROCESS GO:2000628 M25507 39 0.38430340407466335 1.2442227706006947 0.15051546391752577 0.826871746963833 MALAT1	ETS1	NFATC3	NEAT1	DDX5	JUN	DROSHA Any process that modulates the frequency	rate or extent of miRNA metabolic process. [GOC:dph] http://amigo.geneontology.org/amigo/term/GO:2000628 2025.1.Hs up
GOBP_OSTEOBLAST_DIFFERENTIATION GO:0001649 M11227 92 0.319058481701898 1.226670370258136 0.1509433962264151 0.826871746963833 CRIM1	PTK2	FERMT2	FBL	VCAN	DDX5	CYP24A1	PPP3CA	RRBP1	RRAS2	SKI	GSK3B	LRP5	RASSF2	RSL1D1	ACVR2A	SATB2	FASN The process whereby a relatively unspecialized cell acquires the specialized features of an osteoblast	a mesodermal or neural crest cell that gives rise to bone. [CL:0000062	GO_REF:0000034	GOC:jid] http://amigo.geneontology.org/amigo/term/GO:0001649 2025.1.Hs up
GOBP_ENDOCARDIAL_CUSHION_DEVELOPMENT GO:0003197 M10798 16 -0.49898380726440317 -1.3116476798913932 0.15430861723446893 0.8348309402501157 RBPJ	ROBO2	BMPR2	TGFB1	TGFBR1 The progression of a cardiac cushion over time	from its initial formation to the mature structure. The endocardial cushion is a specialized region of mesenchymal cells that will give rise to the heart septa and valves. [GOC:mtg_heart] http://amigo.geneontology.org/amigo/term/GO:0003197 2025.1.Hs down
GOBP_REGULATION_OF_GLIAL_CELL_DIFFERENTIATION GO:0045685 M15023 18 -0.47843835938078416 -1.3008976473251932 0.15737051792828685 0.8348309402501157 DICER1	TNFRSF21	PTN	TGFB1 Any process that modulates the frequency	rate or extent of glia cell differentiation. [GOC:go_curators] http://amigo.geneontology.org/amigo/term/GO:0045685 2025.1.Hs down
GOBP_NUCLEAR_TRANSCRIBED_MRNA_POLY_A_TAIL_SHORTENING GO:0000289 M14619 20 0.4602782797027036 1.295646343576866 0.1541501976284585 0.8348309402501157 CNOT6L	CNOT1	CNOT10	TNRC6B	CNOT2	CNOT6	PAN3	SAMD4A	CNOT11 Shortening of the poly(A) tail of a nuclear-transcribed mRNA from full length to an oligo(A) length. [GOC:krc] http://amigo.geneontology.org/amigo/term/GO:0000289 2025.1.Hs up
GOBP_PEPTIDYL_THREONINE_MODIFICATION GO:0018210 M12785 23 0.44527411308086395 1.2894771244920251 0.15492957746478872 0.8348309402501157 CEMIP	MAP3K10	CADM4	PRKDC	PARD3 The modification of peptidyl-threonine. [GOC:go_curators] http://amigo.geneontology.org/amigo/term/GO:0018210 2025.1.Hs up
GOBP_NEGATIVE_REGULATION_OF_CARBOHYDRATE_METABOLIC_PROCESS GO:0045912 M14102 24 -0.4395814653957969 -1.2885522834541496 0.15748031496062992 0.8348309402501157 DDIT4	USP7	LEPR	TGFB1	PPARA	STAT3	EP300	CLK2	GRB10	PLEK	NCOR1	KAT2A	PRKG1 Any process that stops	prevents	or reduces the frequency	rate or extent of the chemical reactions and pathways involving carbohydrate. [GOC:go_curators] http://amigo.geneontology.org/amigo/term/GO:0045912 2025.1.Hs down
GOBP_INTRINSIC_APOPTOTIC_SIGNALING_PATHWAY_IN_RESPONSE_TO_OXIDATIVE_STRESS GO:0008631 M22556 24 -0.43928342768025375 -1.287678640661743 0.15748031496062992 0.8348309402501157 FBXW7	HIF1A	HSPB1	PPIA	GPX1	P4HB The series of molecular signals in which an intracellular signal is conveyed to trigger the apoptotic death of a cell. The pathway is induced in response to oxidative stress	a state often resulting from exposure to high levels of reactive oxygen species	and ends when the execution phase of apoptosis is triggered. [GOC:ai	GOC:mtg_apoptosis] http://amigo.geneontology.org/amigo/term/GO:0008631 2025.1.Hs down
GOBP_CERAMIDE_BIOSYNTHETIC_PROCESS GO:0046513 M12013 21 0.45067735520162044 1.2844222287681537 0.15748031496062992 0.8348309402501157 ST3GAL3	P2RX1	B4GALT5	B4GALT6	UGCG	SAMD8	SMPD4 The chemical reactions and pathways resulting in the formation of ceramides	any N-acylated sphingoid. [GOC:ai] http://amigo.geneontology.org/amigo/term/GO:0046513 2025.1.Hs up
GOBP_OVARIAN_FOLLICLE_DEVELOPMENT GO:0001541 M12328 18 0.47035620596526256 1.2840822735743151 0.156 0.8348309402501157 GAS2	UBE3A	ZFY	BAX	CTNNA1	DMC1	FOXO3 The process whose specific outcome is the progression of the ovarian follicle over time	from its formation to the mature structure. [https://www.ncbi.nlm.nih.gov/books/NBK279054/] http://amigo.geneontology.org/amigo/term/GO:0001541 2025.1.Hs up
GOBP_ADULT_LOCOMOTORY_BEHAVIOR GO:0008344 M11578 27 -0.4233205825715527 -1.2649217788857174 0.15551181102362205 0.8348309402501157 CCND2	PPT1	CNP	APP	HIPK2	PUM1	ARCN1	OXR1 Locomotory behavior in a fully developed and mature organism. [GOC:ai] http://amigo.geneontology.org/amigo/term/GO:0008344 2025.1.Hs down
GOBP_EXTERNAL_ENCAPSULATING_STRUCTURE_ORGANIZATION GO:0045229 M40442 96 -0.30733899528688546 -1.1852392636727835 0.1569767441860465 0.8348309402501157 CSGALNACT1	CREB3L1	CRISPLD2	LAMC1	PRDM5	CST3	EXT1	PLOD1	DDR1	LAMB1	AXIN2	APP	ERCC2	NID2	NID1	TGFB1	SMOC1	NTN4	RUNX1	TGFBR1	EFEMP2	COL6A1	COL1A2	STAT3	SLC39A8	DDR2	MYO1E	NF1	COL17A1	THSD4	CAPG A process that is carried out at the cellular level which results in the assembly	arrangement of constituent parts	or disassembly of external structures that lie outside the plasma membrane and surround the entire cell. [GOC:ai	GOC:dph	GOC:jl	GOC:mah] http://amigo.geneontology.org/amigo/term/GO:0045229 2025.1.Hs down
GOBP_REGULATION_OF_SYSTEM_PROCESS GO:0044057 M14237 150 -0.28201485331981596 -1.1709740966259994 0.15637065637065636 0.8348309402501157 DICER1	ATP2B1	TNFRSF21	PER2	MYL9	STX1A	HSP90AA1	ANXA6	ECE1	SSH1	PTPN11	CACNA1C	YY1	EIF4A3	RNF10	YWHAE	APP	ENO1	FTO	EIF2AK3	WNK1	GTF2IRD1	BMPR2	PRKCA	RNLS	JUP	UNC13B	NUP155	PPARA	ATP2B4	MGLL	BAIAP2	RHOA	ATP2A2 Any process that modulates the frequency	rate or extent of a system process	a multicellular organismal process carried out by any of the organs or tissues in an organ system. [GOC:jl] http://amigo.geneontology.org/amigo/term/GO:0044057 2025.1.Hs down
GOBP_LIPID_LOCALIZATION GO:0010876 M15749 131 -0.28349807690605106 -1.149506542190235 0.15637065637065636 0.8348309402501157 SLC13A3	THBS1	VAPB	PITPNA	VDAC1	PTPN11	ABCC4	VDAC2	SEC24A	ABCC1	SERINC2	SERINC3	HDLBP	GRAMD1B	NFKB1	CPT1A	STARD10	ABCC10	GOT2	FABP6	VAPA	ABCD4	VPS13D	PLA2G4A	SCARB1	PPARA	PIP4K2A	ARL8B	ATP10A	OSBPL2	ANO6	CROT	VPS13C	ESYT1	ABCC3	DENND5B	OSBPL1A	ZDHHC5	GRAMD1A	ABCA5	LIPA	COMMD1	ATP10D	SERAC1	RPS6KB1	ACACB	PDZD8	SYK	TEX2 Any process in which a lipid is transported to	or maintained in
GOBP_REGULATION_OF_SODIUM_ION_TRANSMEMBRANE_TRANSPORT GO:1902305 M16475 16 0.48568603467726384 1.2941887651142054 0.15904572564612326 0.8372196726184947 ACTN4	DLG1 Any process that modulates the frequency	rate or extent of sodium ion transmembrane transport. [GOC:BHF	GOC:mtg_cardiac_conduct_nov11	GOC:rl	GOC:TermGenie	PMID:18591664] http://amigo.geneontology.org/amigo/term/GO:1902305 2025.1.Hs up
GOBP_DEVELOPMENT_OF_PRIMARY_FEMALE_SEXUAL_CHARACTERISTICS GO:0046545 M23791 37 0.3851993198928273 1.2344150222239003 0.15866388308977036 0.8372196726184947 GAS2	NRIP1	UBE3A	TIPARP	SLIT2	FANCA	ZFY	BAX	NUP107	CTNNA1	DMC1	FOXO3 The process whose specific outcome is the progression of the primary female sexual characteristics over time	from their formation to the mature structure. The primary female sexual characteristics are the ovaries	and they develop in response to sex hormone secretion. [GOC:ai] http://amigo.geneontology.org/amigo/term/GO:0046545 2025.1.Hs up
GOBP_POSITIVE_REGULATION_OF_SECRETION GO:0051047 M4615 96 -0.3072952266545682 -1.1850704718750122 0.15891472868217055 0.8372196726184947 RPH3AL	CREB1	STX1A	HIF1A	PPP3CB	PTPN11	PPIA	SEC24A	STXBP1	ADAM9	ITPR1	FRMD4A	WLS	VEGFC	TGFB1	PRKCA	UNC13B	RAB7A	PLA2G4A	STXBP5 Any process that activates or increases the frequency	rate or extent of the controlled release of a substance from a cell or a tissue. [GOC:ai] http://amigo.geneontology.org/amigo/term/GO:0051047 2025.1.Hs down
GOBP_CELLULAR_RESPONSE_TO_MOLECULE_OF_BACTERIAL_ORIGIN GO:0071219 M48496 59 -0.3453071076780846 -1.2156168826280978 0.1599229287090559 0.8398749612622446 VIM	HDAC5	IRAK3	PTPN11	BCR	CHMP5	ADAM9	GSTP1	NFKB1	PRKCA	TLR1	SPI1	SCARB1	RHOA	HADHB	CDK19	CAPN2 Any process that results in a change in state or activity of a cell (in terms of movement	secretion	enzyme production	gene expression	etc.) as a result of a stimulus by molecules of bacterial origin such as peptides derived from bacterial flagellin. [GOC:mah] http://amigo.geneontology.org/amigo/term/GO:0071219 2025.1.Hs down
GOBP_NEGATIVE_REGULATION_OF_COLD_INDUCED_THERMOGENESIS GO:0120163 M24911 17 0.4776103792378694 1.2845045127717591 0.1610337972166998 0.8412413049190303 PGAM5	ZNF423	DOCK7	ABHD6	RHEB	ADAM17 Any process that stops	prevents	or reduces the rate of cold-induced thermogenesis. [PMID:27876809] http://amigo.geneontology.org/amigo/term/GO:0120163 2025.1.Hs up
GOBP_REGULATION_OF_TRANSCRIPTION_BY_RNA_POLYMERASE_III GO:0006359 M22401 17 0.47684192983104823 1.2824378141114963 0.1610337972166998 0.8412413049190303 BRF2	ERCC6 Any process that modulates the frequency	rate or extent of transcription mediated by RNA ploymerase III. [GOC:go_curators] http://amigo.geneontology.org/amigo/term/GO:0006359 2025.1.Hs up
GOBP_POLYOL_METABOLIC_PROCESS GO:0019751 M11003 30 -0.41587372359196545 -1.265949228682244 0.16167664670658682 0.8412413049190303 NUDT4	TPI1	INPP5B	GK	ITPKC	PLA2G4A	PRKG2	QDPR	PLEK	PLCG2	PRKG1	OCRL	AGK	INPP4B The chemical reactions and pathways involving a polyol	any alcohol containing three or more hydroxyl groups attached to saturated carbon atoms. [PMID:30240188] http://amigo.geneontology.org/amigo/term/GO:0019751 2025.1.Hs down
GOBP_NEURON_APOPTOTIC_PROCESS GO:0051402 M14106 115 -0.292449002539884 -1.168116940379147 0.16135084427767354 0.8412413049190303 COL6A3	GAPDH	FBXW7	TNFRSF21	HIF1A	PPT1	COL6A2	PRNP	GPX1	ATM	LGMN	STXBP1	APP	IL27RA	TERT	HIPK2	TGFB1	AMBRA1	BRAF	STAMBP	COL6A1	GRN	RHOA	OXR1	AKT1S1	GRINA	PSEN1	NF1	HDAC3	NONO	PINK1 Any apoptotic process in a neuron	the basic cellular unit of nervous tissue. Each neuron consists of a body	an axon	and dendrites. Their purpose is to receive	conduct	and transmit impulses in the nervous system. [CL:0000540	GOC:mtg_apoptosis] http://amigo.geneontology.org/amigo/term/GO:0051402 2025.1.Hs down
GOBP_POSITIVE_REGULATION_OF_AXON_EXTENSION GO:0045773 M13512 15 -0.5049015657558739 -1.311132027338019 0.17857142857142858 0.8424791997756381 FN1	BMPR2	LIMK1	ZFYVE27 Any process that activates or increases the frequency	rate or extent of axon extension. [GOC:go_curators] http://amigo.geneontology.org/amigo/term/GO:0045773 2025.1.Hs down
GOBP_SEMI_LUNAR_VALVE_DEVELOPMENT GO:1905314 M25342 15 -0.4992489047593857 -1.296453156494977 0.19444444444444445 0.8424791997756381 RBPJ	ROBO2	AXIN2	SLIT3	BMPR2	TGFB1	RHOA The process whose specific outcome is the progression of a semi-lunar valve over time	from its formation to the mature structure. [GO_REF:0000094	GOC:BHF	GOC:rl	GOC:TermGenie	PMID:19409885] http://amigo.geneontology.org/amigo/term/GO:1905314 2025.1.Hs down
GOBP_POSITIVE_REGULATION_OF_BIOMINERAL_TISSUE_DEVELOPMENT GO:0070169 M45909 15 -0.497582457843334 -1.2921257151248495 0.19444444444444445 0.8424791997756381 ATP2B1	PTN	BMPR2	PKDCC	SLC20A2	ANO6 Any process that activates or increases the frequency	rate or extent of biomineral tissue development	the formation of hard tissues that consist mainly of inorganic compounds. [GOC:mah] http://amigo.geneontology.org/amigo/term/GO:0070169 2025.1.Hs down
GOBP_POSITIVE_REGULATION_OF_BONE_MINERALIZATION GO:0030501 M22972 15 -0.497582457843334 -1.2921257151248495 0.19444444444444445 0.8424791997756381 ATP2B1	PTN	BMPR2	PKDCC	SLC20A2	ANO6 Any process that activates or increases the frequency	rate or extent of bone mineralization. [GOC:go_curators] http://amigo.geneontology.org/amigo/term/GO:0030501 2025.1.Hs down
GOBP_NEURON_RECOGNITION GO:0008038 M10326 17 -0.47744004049936395 -1.28350915383821 0.1843687374749499 0.8424791997756381 TNFRSF21	EXT1	ROBO2	NPTN	APP	YWHAZ	PALLD The process in which a neuronal cell in a multicellular organism interprets its surroundings. [GOC:go_curators] http://amigo.geneontology.org/amigo/term/GO:0008038 2025.1.Hs down
GOBP_REGULATION_OF_CELLULAR_SENESCENCE GO:2000772 M45292 22 0.4415502814064217 1.2807141535449718 0.16731517509727625 0.8424791997756381 B2M	AKT3	ABL1	RSL1D1	TERF2	RBL1	NEK6 Any process that modulates the frequency	rate or extent of cellular senescence. [GOC:BHF] http://amigo.geneontology.org/amigo/term/GO:2000772 2025.1.Hs up
GOBP_NEGATIVE_REGULATION_OF_SMOOTH_MUSCLE_CELL_PROLIFERATION GO:0048662 M10483 18 -0.47049114223365324 -1.2792887694273891 0.17928286852589642 0.8424791997756381 GSTP1	BMPR2	EFEMP2	MFN2	CDKN1B	MYOCD	IGFBP5	CTNNBIP1	MEF2C	PRKG1 Any process that stops	prevents or reduces the rate or extent of smooth muscle cell proliferation. [CL:0000192	GOC:ebc] http://amigo.geneontology.org/amigo/term/GO:0048662 2025.1.Hs down
GOBP_INNER_MITOCHONDRIAL_MEMBRANE_ORGANIZATION GO:0007007 M12841 16 -0.4859532058796763 -1.2773949489910295 0.18036072144288579 0.8424791997756381 DNAJC11	CHCHD10 A process that is carried out at the cellular level which results in the assembly	arrangement of constituent parts	or disassembly of the mitochondrial inner membrane. [GOC:ai	GOC:dph	GOC:jl	GOC:mah] http://amigo.geneontology.org/amigo/term/GO:0007007 2025.1.Hs down
GOBP_POSITIVE_REGULATION_OF_SUBSTRATE_ADHESION_DEPENDENT_CELL_SPREADING GO:1900026 M11525 23 0.4409383218511032 1.2769210305195595 0.16498993963782696 0.8424791997756381 FERMT2	FLNA	CALR	UNC13D	RREB1	ABL1 Any process that activates or increases the frequency	rate or extent of substrate adhesion-dependent cell spreading. [GOC:TermGenie	GOC:yaf] http://amigo.geneontology.org/amigo/term/GO:1900026 2025.1.Hs up
GOBP_CELL_REDOX_HOMEOSTASIS GO:0045454 M12813 18 -0.4696127810106031 -1.2769004616628394 0.18127490039840638 0.8424791997756381 APEX1	PRDX6	GPX1	TXN2	BOLA2	GSR	GLRX2	GCLC	PRDX3 Any process that maintains the redox environment of a cell or compartment within a cell. [GOC:ai	GOC:dph	GOC:tb] http://amigo.geneontology.org/amigo/term/GO:0045454 2025.1.Hs down
GOBP_POSITIVE_REGULATION_OF_INTRINSIC_APOPTOTIC_SIGNALING_PATHWAY GO:2001244 M15321 18 -0.4694283372138521 -1.2763989498242658 0.18127490039840638 0.8424791997756381 FBXW7	EI24	SERINC3	RPS3	TP53BP1 Any process that activates or increases the frequency	rate or extent of intrinsic apoptotic signaling pathway. [GOC:mtg_apoptosis] http://amigo.geneontology.org/amigo/term/GO:2001244 2025.1.Hs down
GOBP_POSITIVE_REGULATION_OF_NUCLEOTIDE_METABOLIC_PROCESS GO:0045981 M29198 18 -0.46927596875939576 -1.2759846524335103 0.18127490039840638 0.8424791997756381 HIF1A	APP	ENO1	VCP	PPARA	STAT3	PSEN1	PINK1 Any process that activates or increases the frequency	rate or extent of the chemical reactions and pathways involving nucleotides. [GOC:go_curators] http://amigo.geneontology.org/amigo/term/GO:0045981 2025.1.Hs down
GOBP_MESENCHYME_MORPHOGENESIS GO:0072132 M15995 17 -0.4746014535279901 -1.2758781383123365 0.18837675350701402 0.8424791997756381 NCKAP1	RBPJ	ROBO2	TGFB1	TGFBR1 The process in which the anatomical structures of a mesenchymal tissue are generated and organized. A mesenchymal tissue is made up of loosely packed stellate cells. [GOC:mtg_kidney_jan10] http://amigo.geneontology.org/amigo/term/GO:0072132 2025.1.Hs down
GOBP_TRANSCRIPTION_BY_RNA_POLYMERASE_III GO:0006383 M11167 27 0.4266033748737019 1.2734819816603278 0.1659919028340081 0.8424791997756381 BRF2	TBP	ERCC6 The synthesis of RNA from a DNA template by RNA polymerase III	originating at an RNAP III promoter. [GOC:jl	GOC:txnOH	PMID:12381659] http://amigo.geneontology.org/amigo/term/GO:0006383 2025.1.Hs up
GOBP_PROTEIN_LOCALIZATION_TO_CHROMOSOME_TELOMERIC_REGION GO:0070198 M12907 16 -0.4835001378052032 -1.2709467216103896 0.1903807615230461 0.8424791997756381 USP7	TERT	ATRX	BRCA2	CCT6A Any process in which a protein is transported to	or maintained at	the telomeric region of a chromosome. [GOC:BHF	GOC:mah] http://amigo.geneontology.org/amigo/term/GO:0070198 2025.1.Hs down
GOBP_ENERGY_RESERVE_METABOLIC_PROCESS GO:0006112 M18828 29 -0.42129349659356413 -1.2697141032290844 0.17131474103585656 0.8424791997756381 PHKG1	PER2	WIPI1	LEPR	COL6A1	ATG3	EPM2A	UGP2	GFPT2	GRB10	MRAP2	PHKA2 The chemical reactions and pathways by which a cell derives energy from stored compounds such as fats or glycogen. [GOC:mah] http://amigo.geneontology.org/amigo/term/GO:0006112 2025.1.Hs down
GOBP_KIDNEY_MORPHOGENESIS GO:0060993 M15599 26 0.4271209023308007 1.2638745357427357 0.17248459958932238 0.8424791997756381 DLG1	ASXL1	HS3ST3A1	AHI1	PPP3CA	KLHL3 Morphogenesis of a kidney. A kidney is an organ that filters the blood and excretes the end products of body metabolism in the form of urine. [GOC:dph	GOC:mtg_kidney_jan10] http://amigo.geneontology.org/amigo/term/GO:0060993 2025.1.Hs up
GOBP_HYDROGEN_PEROXIDE_METABOLIC_PROCESS GO:0042743 M15190 17 -0.4692100197994334 -1.2613842669234248 0.20641282565130262 0.8424791997756381 HBE1	PRDX6	GPX1	HBG2	STAT3	RAC1	PINK1	PRDX3 The chemical reactions and pathways involving hydrogen peroxide (H2O2)	a potentially harmful byproduct of aerobic cellular respiration which can cause damage to DNA. [GOC:jl	PMID:21734470] http://amigo.geneontology.org/amigo/term/GO:0042743 2025.1.Hs down
GOBP_INTERLEUKIN_12_PRODUCTION GO:0032615 M23115 18 -0.46385646195792773 -1.2612487444331206 0.19123505976095617 0.8424791997756381 THBS1	IRAK3	MAST2	NFKB1	LILRA5	PLCG2	C1QBP	HSPD1	SYK	LAPTM5	SCIMP The appearance of interleukin-12 due to biosynthesis or secretion following a cellular stimulus	resulting in an increase in its intracellular or extracellular levels. [GOC:mah] http://amigo.geneontology.org/amigo/term/GO:0032615 2025.1.Hs down
GOBP_ALPHA_AMINO_ACID_BIOSYNTHETIC_PROCESS GO:1901607 M49603 24 -0.43013037638954665 -1.26084815286901 0.1830708661417323 0.8424791997756381 PSAT1	SERINC3	GOT2	ENOPH1	ATP2B4	CAD	ASL	SEPHS1	SHMT1	APIP	GLUD1	ALDH18A1 The chemical reactions and pathways resulting in the formation of an alpha-amino acid. [GOC:TermGenie] http://amigo.geneontology.org/amigo/term/GO:1901607 2025.1.Hs down
GOBP_CELL_JUNCTION_MAINTENANCE GO:0034331 M23261 19 0.4531708991846543 1.2585852586105335 0.1623246492985972 0.8424791997756381 DLG1	FERMT2	SDF4	MTSS1	PKP1	CSMD2 The organization process that preserves a cell junction in a stable functional or structural state. A cell junction is a specialized region of connection between two cells or between a cell and the extracellular matrix. [GOC:dph	GOC:jl	GOC:mah] http://amigo.geneontology.org/amigo/term/GO:0034331 2025.1.Hs up
GOBP_IMMUNOGLOBULIN_PRODUCTION_INVOLVED_IN_IMMUNOGLOBULIN_MEDIATED_IMMUNE_RESPONSE GO:0002381 M14208 21 -0.4498196956516934 -1.2559722089820184 0.18016194331983806 0.8424791997756381 MLH1	TFRC	IL27RA	HMCES	TP53BP1	TGFB1	ERCC1	PCYT1A	HSPD1	MSH6	ATAD5	APLF The appearance of immunoglobulin due to biosynthesis or secretion following a cellular stimulus during an immune response	resulting in an increase in its intracellular or extracellular levels. [GOC:add	ISBN:0781735149	PMID:9185563] http://amigo.geneontology.org/amigo/term/GO:0002381 2025.1.Hs down
GOBP_SOMITE_DEVELOPMENT GO:0061053 M16087 29 -0.4151354124293904 -1.2511545802947288 0.1892430278884462 0.8424791997756381 NCKAP1	RBPJ	SEMA3C	AXIN2	ATM	WDR19	EP300	PSEN1 The progression of a somite from its initial formation to the mature structure. Somites are mesodermal clusters that are arranged segmentally along the anterior posterior axis of an embryo. [GOC:dph] http://amigo.geneontology.org/amigo/term/GO:0061053 2025.1.Hs down
GOBP_MOLTING_CYCLE_PROCESS GO:0022404 M45834 33 -0.40202456162714983 -1.2507124875069056 0.172 0.8424791997756381 EXT1	PUM2	RBPJ	NOM1	ERCC2	COL6A1	NF1	IGFBP5	CD109	LDB2	NSUN2	KRT17 A multicellular organismal process involved in the periodic casting off and regeneration of an outer covering of cuticle	feathers	hair	horns	skin. [GOC:isa_complete] http://amigo.geneontology.org/amigo/term/GO:0022404 2025.1.Hs down
GOBP_REGULATION_OF_PROTEIN_EXPORT_FROM_NUCLEUS GO:0046825 M11196 22 -0.44577198343357166 -1.249951315112766 0.1721311475409836 0.8424791997756381 RBM22	BARD1	PTPN11	YWHAE	RANGAP1 Any process that modulates the frequency	rate or extent of the directed movement of proteins from the nucleus to the cytoplasm. [GOC:bf] http://amigo.geneontology.org/amigo/term/GO:0046825 2025.1.Hs down
GOBP_REGULATION_OF_AUTOPHAGY_OF_MITOCHONDRION GO:1903146 M25145 26 -0.419125104499915 -1.2497907984003627 0.1766990291262136 0.8424791997756381 FBXW7	VDAC1	BNIP3L	HUWE1	EIF2AK1	AMBRA1	VPS13D	VPS13C	PINK1	TSC2	FBXL4 Any process that modulates the frequency	rate or extent of mitochondrion degradation by an autophagic process. [GO_REF:0000058	GOC:autophagy	GOC:bf	GOC:PARL	GOC:TermGenie	PMID:24600391] http://amigo.geneontology.org/amigo/term/GO:1903146 2025.1.Hs down
GOBP_POSITIVE_REGULATION_OF_VIRAL_PROCESS GO:0048524 M16056 26 -0.417288644572819 -1.2443146513171328 0.18446601941747573 0.8424791997756381 PABPC1	VAPB	PPIA	P4HB Any process that activates or increases the frequency	rate or extent of a multi-organism process in which a virus is a participant. [GOC:bf	GOC:jl] http://amigo.geneontology.org/amigo/term/GO:0048524 2025.1.Hs down
GOBP_POSITIVE_REGULATION_OF_REPRODUCTIVE_PROCESS GO:2000243 M10230 19 0.4479338331606577 1.244040427713335 0.1843687374749499 0.8424791997756381 SMURF2	CDC25C	BAX	AURKA	AGO2	INSR	ZP3	ACVR1B	LFNG	CTNNB1	PLCB1 Any process that activates or increases the frequency	rate or extent of reproductive process. [GOC:mah] http://amigo.geneontology.org/amigo/term/GO:2000243 2025.1.Hs up
GOBP_RIBOSOMAL_LARGE_SUBUNIT_BIOGENESIS GO:0042273 M16031 29 -0.41254484692620536 -1.2433470124558499 0.199203187250996 0.8424791997756381 RPL5	RPL11	RPL7A	RPL35A	BRIX1 A cellular process that results in the biosynthesis of constituent macromolecules	assembly	and arrangement of constituent parts of a large ribosomal subunit; includes transport to the sites of protein synthesis. [GOC:jl] http://amigo.geneontology.org/amigo/term/GO:0042273 2025.1.Hs down
GOBP_LIPOPOLYSACCHARIDE_MEDIATED_SIGNALING_PATHWAY GO:0031663 M14323 21 -0.4452229960472205 -1.2431374509399273 0.1862348178137652 0.8424791997756381 IRAK3	PTPN11	PRKCA	SPI1	SCARB1	PLCG2	MTDH	PRKCE	SCIMP The series of molecular signals initiated by the binding of a lipopolysaccharide (LPS) to a receptor on the surface of a target cell	and ending with the regulation of a downstream cellular process	e.g. transcription. Lipopolysaccharides are major components of the outer membrane of Gram-negative bacteria	making them prime targets for recognition by the immune system. [GOC:mah	GOC:signaling	PMID:15379975] http://amigo.geneontology.org/amigo/term/GO:0031663 2025.1.Hs down
GOBP_EAR_MORPHOGENESIS GO:0042471 M14023 33 0.39578286514377564 1.2410534677579363 0.16533864541832669 0.8424791997756381 PRRX1	ZEB1	SCRIB	FGFR1	TTC39C	WDPCP	CHD7	NR4A3 The process in which the anatomical structures of the ear are generated and organized. The ear is the sense organ in vertebrates that is specialized for the detection of sound	and the maintenance of balance. Includes the outer ear and middle ear	which collect and transmit sound waves; and the inner ear	which contains the organs of balance and (except in fish) hearing. Also includes the pinna	the visible part of the outer ear	present in some mammals. [GOC:jl	ISBN:0192801023] http://amigo.geneontology.org/amigo/term/GO:0042471 2025.1.Hs up
GOBP_NEGATIVE_REGULATION_OF_INTRACELLULAR_TRANSPORT GO:0032387 M16766 21 -0.44353201094908196 -1.2384159362761735 0.1882591093117409 0.8424791997756381 BARD1	CHP1	EI24	NUP153	RANGAP1	SUFU	VPS35	NF1	HDAC3 Any process that stops	prevents	or reduces the frequency	rate or extent of the directed movement of substances within cells. [GOC:mah] http://amigo.geneontology.org/amigo/term/GO:0032387 2025.1.Hs down
GOBP_NEGATIVE_REGULATION_OF_LIPID_BIOSYNTHETIC_PROCESS GO:0051055 M11192 18 -0.4552705647707461 -1.2379032638043592 0.20717131474103587 0.8424791997756381 FBXW7	LPCAT1	UBR4	NFKB1	ANGPTL4	ASXL3	DCAF5 Any process that stops	prevents	or reduces the frequency	rate or extent of the chemical reactions and pathways resulting in the formation of lipids. [GOC:ai] http://amigo.geneontology.org/amigo/term/GO:0051055 2025.1.Hs down
GOBP_FATTY_ACID_DERIVATIVE_BIOSYNTHETIC_PROCESS GO:1901570 M15813 22 0.4266832842506114 1.2375925103710348 0.19844357976653695 0.8424791997756381 FADS2	TMEM135	ACSF3	FASN	ACACA	AACS	HACD1	ACSL3	ELOVL5	ACSS3 The chemical reactions and pathways resulting in the formation of fatty acid derivative. [GOC:pr	GOC:TermGenie] http://amigo.geneontology.org/amigo/term/GO:1901570 2025.1.Hs up
GOBP_DENDRITIC_SPINE_DEVELOPMENT GO:0060996 M11017 41 -0.37602376453619596 -1.237254875720417 0.1643835616438356 0.8424791997756381 SIPA1L1	CAPRIN1	PAK2	TANC2	PDLIM5	PTPRS	BAIAP2	SRGAP2	PSEN1	DLG5	ABI2	RAC1	IQSEC1	ARF4	PPFIA2	EEF2K	ZMYND8	MEF2C	LRRK2	EPHB2	CPEB3 The process whose specific outcome is the progression of the dendritic spine over time	from its formation to the mature structure. A dendritic spine is a protrusion from a dendrite and a specialized subcellular compartment involved in synaptic transmission. [GOC:dph] http://amigo.geneontology.org/amigo/term/GO:0060996 2025.1.Hs down
GOBP_NEGATIVE_REGULATION_OF_VIRAL_PROCESS GO:0048525 M10974 23 -0.42892135736759074 -1.2369863612705765 0.18811881188118812 0.8424791997756381 MX1	VAPB	PPIA	TRIM62 Any process that stops	prevents	or reduces the frequency	rate or extent of a multi-organism process in which a virus is a participant. [GOC:bf	GOC:jl] http://amigo.geneontology.org/amigo/term/GO:0048525 2025.1.Hs down
GOBP_PRESYNAPTIC_ENDOCYTOSIS GO:0140238 M49568 43 -0.3737798096263246 -1.2342643160224824 0.17365269461077845 0.8424791997756381 MX1	ACTB	STX1A	PPP3CB	AP3S1	CLTA	PIP5K1C	AP2A2	AAK1	SNX9	ACTG1	AP2B1	AP3D1	CAPN2	RAC1 A vesicle-mediated transport process in which the presynapse take up external materials or membrane constituents by the invagination of a small region of the plasma membrane to form a new membrane-bounded vesicle. [PMID:24719103] http://amigo.geneontology.org/amigo/term/GO:0140238 2025.1.Hs down
GOBP_MEMORY GO:0007613 M10099 41 -0.3742496437087528 -1.2314173732780418 0.17416829745596868 0.8424791997756381 CREB1	CCND2	PPP3CB	PRNP	LGMN	APP	PTN	ITGA5	EIF4EBP2 The activities involved in the mental information processing system that receives (registers)	modifies	stores	and retrieves informational stimuli. The main stages involved in the formation and retrieval of memory are encoding (processing of received information by acquisition)	storage (building a permanent record of received information as a result of consolidation) and retrieval (calling back the stored information and use it in a suitable way to execute a given task). [GOC:curators	ISBN:0582227089] http://amigo.geneontology.org/amigo/term/GO:0007613 2025.1.Hs down
GOBP_FATTY_ACID_DERIVATIVE_METABOLIC_PROCESS GO:1901568 M16181 27 0.41250804524860407 1.2314050798813876 0.21052631578947367 0.8424791997756381 FADS2	TMEM135	ACSF3	FASN	PTGR1	ACACA	AACS	HACD1	ACSL3	ELOVL5	ACSS3 The chemical reactions and pathways involving fatty acid derivative. [GOC:pr	GOC:TermGenie] http://amigo.geneontology.org/amigo/term/GO:1901568 2025.1.Hs up
GOBP_NEGATIVE_REGULATION_OF_CELLULAR_RESPONSE_TO_GROWTH_FACTOR_STIMULUS GO:0090288 M12333 35 0.3880432103954439 1.2313626078840565 0.16288659793814433 0.8424791997756381 CRIM1	CFLAR	CADM4	SMURF2	ADAMTS12	SLIT2	ABL1	SKI	CTDSPL2	SEMA6A Any process that decreases the rate	frequency	or extent of a change in state or activity of a cell (in terms of movement	secretion	enzyme production	gene expression	etc.) as a result of a growth factor stimulus. [GOC:BHF] http://amigo.geneontology.org/amigo/term/GO:0090288 2025.1.Hs up
GOBP_AMYLOID_BETA_CLEARANCE GO:0097242 M24753 17 0.45771725663703544 1.231003150856911 0.20278330019880716 0.8424791997756381 LDLR	PICALM	ITGB2 The process in which amyloid-beta is removed from extracellular brain regions by mechanisms involving cell surface receptors. [GOC:aruk	GOC:bc	GOC:BHF	PMID:18289866	PMID:19098903	PMID:26005850] http://amigo.geneontology.org/amigo/term/GO:0097242 2025.1.Hs up
GOBP_REGULATION_OF_NEURON_MIGRATION GO:2001222 M13430 23 0.4250285680665845 1.230847695109397 0.193158953722334 0.8424791997756381 ZNF609	FLNA	ARHGEF2	CTNNA2	SEMA6A	SOCS7	ADAM17	NTNG1 Any process that modulates the frequency	rate or extent of neuron migration. [GOC:obol] http://amigo.geneontology.org/amigo/term/GO:2001222 2025.1.Hs up
GOBP_NEGATIVE_REGULATION_OF_CELL_CYCLE_G1_S_PHASE_TRANSITION GO:1902807 M14671 27 0.4123140157218075 1.230825869493381 0.21052631578947367 0.8424791997756381 DLG1	FBXO7	PRKDC	CCND1	RFWD3	TMSB4X	RBL1	EZH2	WAC	GIGYF2 Any signaling pathway that decreases or inhibits the activity of a cell cycle cyclin-dependent protein kinase to modulate the switch from G1 phase to S phase of the cell cycle. [GO_REF:0000058	GOC:mtg_cell_cycle	GOC:TermGenie] http://amigo.geneontology.org/amigo/term/GO:1902807 2025.1.Hs up
GOBP_CHLORIDE_TRANSPORT GO:0006821 M12615 24 0.4241800926709031 1.2300625398978926 0.20445344129554655 0.8424791997756381 GABRB3	ATP8B1	UCP2	SLC26A7	SLC12A9	GABRE	SLC1A4	CLNS1A The directed movement of chloride into	out of or within a cell	or between cells	by means of some agent such as a transporter or pore. [GOC:krc] http://amigo.geneontology.org/amigo/term/GO:0006821 2025.1.Hs up
GOBP_INTRINSIC_APOPTOTIC_SIGNALING_PATHWAY_IN_RESPONSE_TO_DNA_DAMAGE GO:0008630 M13458 41 -0.3730787508377849 -1.2275647100950693 0.1761252446183953 0.8424791997756381 TPT1	CD44	MLH1	DDIT4	EI24	RPS27L	ATM	RPS3	HIPK2	HIPK1	BRCA2	EP300	PPP2R5C	PIK3R1 The series of molecular signals in which an intracellular signal is conveyed to trigger the apoptotic death of a cell. The pathway is induced by the detection of DNA damage	and ends when the execution phase of apoptosis is triggered. [GOC:go_curators	GOC:mtg_apoptosis] http://amigo.geneontology.org/amigo/term/GO:0008630 2025.1.Hs down
GOBP_NEURAL_RETINA_DEVELOPMENT GO:0003407 M11465 22 -0.43723724544731785 -1.22601978202742 0.18442622950819673 0.8424791997756381 PER2	FAT3	HIPK2	HIPK1	ATP2B4	STAT3	RAB11FIP4	PSEN1 The progression of the neural retina over time from its initial formation to the mature structure. The neural retina is the part of the retina that contains neurons and photoreceptor cells. [GOC:ascb_2009	GOC:dph	GOC:tb] http://amigo.geneontology.org/amigo/term/GO:0003407 2025.1.Hs down
GOBP_SARCOPLASMIC_RETICULUM_CALCIUM_ION_TRANSPORT GO:0070296 M14090 16 0.46006355947182176 1.225913547838635 0.1988071570576541 0.8424791997756381 ASPH	FKBP1A	PDE4D	JPH1	CHD7 The directed movement of calcium ions (Ca2+) into	out of or within the sarcoplasmic reticulum. [GOC:BHF	GOC:vk] http://amigo.geneontology.org/amigo/term/GO:0070296 2025.1.Hs up
GOBP_ADULT_BEHAVIOR GO:0030534 M10832 46 -0.36631253937551855 -1.2243717179073137 0.16798418972332016 0.8424791997756381 CCND2	PPT1	PAX5	CNP	APP	BBS2	HIPK2	PUM1	ARCN1	PPARA	OXR1 Behavior in a fully developed and mature organism. [GOC:mah	ISBN:0877797099] http://amigo.geneontology.org/amigo/term/GO:0030534 2025.1.Hs down
GOBP_INTERLEUKIN_6_PRODUCTION GO:0032635 M23123 27 -0.4094170917829389 -1.2233768386557395 0.2047244094488189 0.8424791997756381 IRAK3	MAPKAPK2	APP	IL27RA	TGFB1	TLR1	ELF4	STAT3	LILRA5	CAPN2	PLCG2	HSPD1	SYK	LAPTM5	SCIMP	CD74	RIPK2 The appearance of interleukin-6 due to biosynthesis or secretion following a cellular stimulus	resulting in an increase in its intracellular or extracellular levels. [GOC:mah] http://amigo.geneontology.org/amigo/term/GO:0032635 2025.1.Hs down
GOBP_CELL_SURFACE_RECEPTOR_SIGNALING_PATHWAY_VIA_STAT GO:0097696 M24785 45 -0.36677320849829365 -1.2210278703615591 0.17365269461077845 0.8424791997756381 PKD2	JAK1	STAT5B	LEPR	TGFB1	TYK2	NF2	CRLF3	STAMBP	STAT3	EP300	NLK An intracellular signal transduction process in which STAT proteins (Signal Transducers and Activators of Transcription) convey a signal to trigger a change in the activity or state of a cell. The STAT cascade begins with receptor activation followed by activation of STAT proteins by kinases. It proceeds through STA dimerization and subsequent nuclear translocation of STAT proteins	and ends with regulation of target gene expression by STAT proteins. [GOC:rjd	PMID:21534947	PMID:24587195] http://amigo.geneontology.org/amigo/term/GO:0097696 2025.1.Hs down
GOBP_RETINA_HOMEOSTASIS GO:0001895 M15299 16 0.4581985868399121 1.2209440275001167 0.20079522862823063 0.8424791997756381 POC1B	ERCC6	USP45	ARAP1	NPHP4	CCDC66	CIB2 A tissue homeostatic process involved in the maintenance of an internal equilibrium within the retina of the eye	including control of cellular proliferation and death and control of metabolic function. [GOC:add	GOC:dph	GOC:tb	PMID:15365173	PMID:15365178] http://amigo.geneontology.org/amigo/term/GO:0001895 2025.1.Hs up
GOBP_RNA_3_END_PROCESSING GO:0031123 M6392 38 -0.3748057042712419 -1.2191963559127215 0.18476190476190477 0.8424791997756381 CPSF2	BARD1	CPSF1	RPS21	RPRD1B	CSTF3 Any process involved in forming the mature 3' end of an RNA molecule. [GOC:mah] http://amigo.geneontology.org/amigo/term/GO:0031123 2025.1.Hs down
GOBP_REGULATION_OF_EPITHELIAL_CELL_MIGRATION GO:0010632 M11069 29 0.40041491389103945 1.2188274532523056 0.204 0.8424791997756381 PTK2	CORO1C	CLASP1	MMP9	RREB1	JUN Any process that modulates the frequency	rate or extent of epithelial cell migration. [GOC:BHF	GOC:dph	GOC:tb] http://amigo.geneontology.org/amigo/term/GO:0010632 2025.1.Hs up
GOBP_MODIFIED_AMINO_ACID_METABOLIC_PROCESS GO:0006575 M1635 56 -0.3499402668191455 -1.2177087365056691 0.16926070038910507 0.8424791997756381 GPX1	P4HB	SERINC2	GSTP1	MTHFD1L	POR	CPT1A	ICMT	GOT2	ALDH7A1	PTDSS1	SERINC1	GSR	GLRX2	CROT	CRAT	CPQ	ATIC	ETHE1	GCLC	SHMT1	AAAS	GGT7	G6PD	CPT1C	MTHFS	ABHD12	GCLM The chemical reactions and pathways involving compounds derived from amino acids	organic acids containing one or more amino substituents. [GOC:ai] http://amigo.geneontology.org/amigo/term/GO:0006575 2025.1.Hs down
GOBP_MYELOID_CELL_DEVELOPMENT GO:0061515 M10592 33 -0.39130938314123276 -1.217377192061373 0.2 0.8424791997756381 FBXW7	PTPN11	FBN1	APP	ERCC2	MEIS1	PABPC4	LRRK1	FAM210B	EP300	PIP4K2A	TMOD3	FLI1	RAC1 The process whose specific outcome is the progression of a myeloid cell over time	from its formation to the mature structure. [GOC:dph] http://amigo.geneontology.org/amigo/term/GO:0061515 2025.1.Hs down
GOBP_POSITIVE_REGULATION_OF_CELL_JUNCTION_ASSEMBLY GO:1901890 M12995 34 0.3834946086911098 1.2171914030651674 0.18363273453093812 0.8424791997756381 FERMT2	STAU2	CLSTN3	SDC4	ABL1	CUX2 Any process that activates or increases the frequency	rate or extent of cell junction assembly. [GOC:TermGenie] http://amigo.geneontology.org/amigo/term/GO:1901890 2025.1.Hs up
GOBP_ALTERNATIVE_MRNA_SPLICING_VIA_SPLICEOSOME GO:0000380 M10881 29 0.3997540451668594 1.2168158275208882 0.204 0.8424791997756381 RSRC1	TRA2B	DDX5	PTBP1	RBM4	DYRK1A	CELF1	HNRNPM	CDK13	RNPS1	RBPMS2	KHDRBS1 The process of generating multiple mRNA molecules from a given set of exons by differential use of exons from the primary transcript(s) to form multiple mature mRNAs that vary in their exon composition. [GOC:krc	PMID:12110900] http://amigo.geneontology.org/amigo/term/GO:0000380 2025.1.Hs up
GOBP_ENDODERM_DEVELOPMENT GO:0007492 M13755 35 -0.3821035865106051 -1.215386812739472 0.20309477756286268 0.8424791997756381 FN1	NCKAP1	LAMC1	EXT1	LAMB1	ITGB5	ITGA5	TGFB1	SSBP3	GRB2	COL6A1	KIF16B The process whose specific outcome is the progression of the endoderm over time	from its formation to the mature structure. The endoderm is the innermost germ layer that develops into the gastrointestinal tract	the lungs and associated tissues. [GOC:dph	GOC:tb] http://amigo.geneontology.org/amigo/term/GO:0007492 2025.1.Hs down
GOBP_INTRINSIC_APOPTOTIC_SIGNALING_PATHWAY_BY_P53_CLASS_MEDIATOR GO:0072332 M15049 38 -0.3732728325086056 -1.2142101146528093 0.19238095238095237 0.8424791997756381 CD44	DDIT4	RPS27L	ERCC2	HIPK2	TP53BP1	HIPK1	BRCA2	EP300	PPP2R5C The series of molecular signals in which an intracellular signal is conveyed to trigger the apoptotic death of a cell. The pathway is induced by the cell cycle regulator phosphoprotein p53	or an equivalent protein	and ends when the execution phase of apoptosis is triggered. [GOC:mah	GOC:mtg_apoptosis] http://amigo.geneontology.org/amigo/term/GO:0072332 2025.1.Hs down
GOBP_NEGATIVE_REGULATION_OF_TRANSFERASE_ACTIVITY GO:0051348 M13535 38 -0.373270086654716 -1.214201182731502 0.19238095238095237 0.8424791997756381 CEP85	CDK5RAP1	RPL5	RPL11	CHP1	PPIA Any process that stops or reduces the rate of transferase activity	the catalysis of the transfer of a group	e.g. a methyl group	glycosyl group	acyl group	phosphorus-containing	or other groups	from a donor compound to an acceptor. [GOC:ai] http://amigo.geneontology.org/amigo/term/GO:0051348 2025.1.Hs down
GOBP_POSITIVE_REGULATION_OF_APOPTOTIC_SIGNALING_PATHWAY GO:2001235 M16706 44 -0.36295704262248624 -1.2138097623550537 0.18613861386138614 0.8424791997756381 FBXW7	THBS1	EI24	APP	SERINC3	PAK2	RPS3	TP53BP1	EEF1E1	TGFBR1	FAF1	STYXL1	NF1	CTSC Any process that activates or increases the frequency	rate or extent of apoptotic signaling pathway. [GOC:mtg_apoptosis] http://amigo.geneontology.org/amigo/term/GO:2001235 2025.1.Hs down
GOBP_REGULATION_OF_MRNA_PROCESSING GO:0050684 M23903 55 0.3454559158524421 1.212374277536942 0.1762295081967213 0.8424791997756381 DAZAP1	NUP98	SLTM	TRA2B	RBM39	DDX5	PTBP1	RBM4	DYRK1A	CPEB1	SRSF4	CELF1	CCNB1	CLNS1A	EXOSC10	RBM23	RNPS1	RBPMS2	KHDRBS1	CIRBP	SRRM1 Any process that modulates the frequency	rate or extent of mRNA processing	those processes involved in the conversion of a primary mRNA transcript into a mature mRNA prior to its translation into polypeptide. [GOC:ai] http://amigo.geneontology.org/amigo/term/GO:0050684 2025.1.Hs up
GOBP_FOCAL_ADHESION_ASSEMBLY GO:0048041 M10965 46 0.3585250273518978 1.2117108187514911 0.16532258064516128 0.8424791997756381 PTK2	FERMT2	CORO1C	CLASP1	DUSP3	DUSP22	SDC4	ABL1	THSD1	PIP5K1A	WDPCP	CTTN	CLASP2 The aggregation and bonding together of a set of components to form a focal adhesion	a complex of intracellular signaling and structural proteins that provides a structural link between the internal actin cytoskeleton and the ECM	and also function as a locus of signal transduction activity. [GOC:jid	GOC:mah] http://amigo.geneontology.org/amigo/term/GO:0048041 2025.1.Hs up
GOBP_NEUROTRANSMITTER_TRANSPORT GO:0006836 M11274 69 -0.33136151635177685 -1.2088790301537637 0.17196261682242991 0.8424791997756381 MCTP2	RPH3AL	PER2	STX1A	PPT1	STXBP1	APP	ICA1	PIP5K1C	BRAF	UNC13B	STXBP5	ATP2A2	PSEN1	OSBPL2	AP2B1	NF1	RAB5A	PRKCB	EFR3A	PPFIA2	FBXO45	SLC38A1	MEF2C	LRRK2	RIMS2	CACNA1B	SYN3 The directed movement of a neurotransmitter into	out of or within a cell	or between cells	by means of some agent such as a transporter or pore. Neurotransmitters are any chemical substance that is capable of transmitting (or inhibiting the transmission of) a nerve impulse from a neuron to another cell. [GOC:ai] http://amigo.geneontology.org/amigo/term/GO:0006836 2025.1.Hs down
GOBP_SOMATIC_DIVERSIFICATION_OF_IMMUNE_RECEPTORS GO:0002200 M13638 36 -0.3774679875183015 -1.2088260308867345 0.2076923076923077 0.8424791997756381 MLH1	YY1	TFRC	ATM	IL27RA	HMCES	TP53BP1	TGFB1	SAMHD1	ADAR	MCM3AP	ERCC1 The somatic process allowing for the production of immune receptors whose specificity is not encoded in the germline genomic sequences. [GOC:add	ISBN:0781735149	PMID:16102575	PMID:16166509] http://amigo.geneontology.org/amigo/term/GO:0002200 2025.1.Hs down
GOBP_ORGANELLE_MEMBRANE_FUSION GO:0090174 M12989 55 -0.34788046359871105 -1.2072050253112059 0.17315175097276264 0.8424791997756381 UVRAG	RPH3AL	STX1A	STX5	RAB2A	CHMP4A	CHMP5	STXBP1	USO1	VPS11	VTI1B	RAB7A	KIAA0319L	PIP4K2A	ARL8B	CHMP3	ANKFY1 The joining of two lipid bilayers to form a single organelle membrane. [GOC:ascb_2009	GOC:dph	GOC:tb] http://amigo.geneontology.org/amigo/term/GO:0090174 2025.1.Hs down
GOBP_POSITIVE_REGULATION_OF_PROTEIN_LOCALIZATION_TO_PLASMA_MEMBRANE GO:1903078 M46909 30 0.39249710404156574 1.2063876292304347 0.2055888223552894 0.8424791997756381 DLG1	SQSTM1	RHOG	PRKCI	PKP1	CNST	STAC	EZR	ACSL3	PDPK1	PTPN9	RER1	EPHA3 Any process that activates or increases the frequency	rate or extent of protein localization to plasma membrane. [GO_REF:0000058	GOC:BHF	GOC:rl	GOC:TermGenie	PMID:11602640] http://amigo.geneontology.org/amigo/term/GO:1903078 2025.1.Hs up
GOBP_REGULATION_OF_NEUROTRANSMITTER_TRANSPORT GO:0051588 M13574 35 -0.37886033655576584 -1.2050707535223202 0.20889748549323017 0.8424791997756381 MCTP2	PER2	STX1A	STXBP1	APP	BRAF	STXBP5	ATP2A2	NF1	RAB5A	PRKCB	PPFIA2	FBXO45	MEF2C	LRRK2	RIMS2	CACNA1B Any process that modulates the frequency	rate or extent of the directed movement of a neurotransmitter into	out of or within a cell	or between cells	by means of some agent such as a transporter or pore. [GOC:ai] http://amigo.geneontology.org/amigo/term/GO:0051588 2025.1.Hs down
GOBP_PYRIDINE_CONTAINING_COMPOUND_CATABOLIC_PROCESS GO:0072526 M29280 43 -0.36453234576991606 -1.2037281170151486 0.19560878243512975 0.8424791997756381 GAPDH	DDIT4	HIF1A	TPI1	HK1	GPI	APP	ENO1	ALDOA	PPARA	COL6A1	STAT3	EP300	PSEN1 The chemical reactions and pathways resulting in the breakdown of a pyridine-containing compound	i.e. any compound that contains pyridine or a formal derivative thereof. [GOC:mah] http://amigo.geneontology.org/amigo/term/GO:0072526 2025.1.Hs down
GOBP_MALE_SEX_DIFFERENTIATION GO:0046661 M16772 58 0.3403862444600847 1.2029437669407794 0.17355371900826447 0.8424791997756381 RHOBTB3	EIF2S2	FLNA	DHCR24	CCND1	FANCA	ACVR2A	BAX	GREB1L	CTNNA1	NUP210L	GFRA1	NASP	INSR	AGO4	FNDC3A	YBX3	KIF18A	NCOA1	CTNNB1 The establishment of the sex of a male organism by physical differentiation. [GOC:bf] http://amigo.geneontology.org/amigo/term/GO:0046661 2025.1.Hs up
GOBP_HOMOLOGOUS_RECOMBINATION GO:0035825 M23395 22 -0.42868446868224036 -1.2020376679361973 0.20491803278688525 0.8424791997756381 MLH1	BARD1	ATM	RBBP8	TOPBP1 A DNA recombination process that results in the exchange of an equal amount of genetic material between highly homologous DNA molecules. [GOC:mah	PMID:11139492	PMID:17304215] http://amigo.geneontology.org/amigo/term/GO:0035825 2025.1.Hs down
GOBP_POSITIVE_REGULATION_OF_INFLAMMATORY_RESPONSE GO:0050729 M15877 31 0.38833405591807857 1.2018127885400745 0.20355731225296442 0.8424791997756381 ETS1	NEAT1	CCL24	LDLR Any process that activates or increases the frequency	rate or extent of the inflammatory response. [GOC:ai] http://amigo.geneontology.org/amigo/term/GO:0050729 2025.1.Hs up
GOBP_MONOSACCHARIDE_METABOLIC_PROCESS GO:0005996 M15452 81 -0.32225145245797976 -1.1986050978570721 0.16666666666666666 0.8424791997756381 GAPDH	PER2	TPI1	HK1	FBN1	NUDT5	IGFBP4	GPI	USP7	ENO1	NCOA2	ALDOA	LEPR	MDH2	CPT1A	SLC25A13	GLB1	NNMT	PPARA	INPPL1	SLC2A3	EP300	HECTD4	CLK2	LCMT1	PC	SLC23A2	GCLC	ADPGK	DDB1	LIPA	KAT2A	KBTBD2	PFKL	ACACB	G6PD The chemical reactions and pathways involving monosaccharides	the simplest carbohydrates. They are polyhydric alcohols containing either an aldehyde or a keto group and between three to ten or more carbon atoms. They form the constitutional repeating units of oligo- and polysaccharides. [ISBN:0198506732] http://amigo.geneontology.org/amigo/term/GO:0005996 2025.1.Hs down
GOBP_AMYLOID_PRECURSOR_PROTEIN_METABOLIC_PROCESS GO:0042982 M14901 32 0.38592643427120993 1.1984446325388376 0.1968503937007874 0.8424791997756381 DLG1	PICALM	BACE2	DHCR24	FKBP1A	DYRK1A	FLOT2	GGA3	ADAM17	AGO2 The chemical reactions and pathways involving amyloid precursor protein (APP)	the precursor of amyloid-beta	a glycoprotein associated with Alzheimer's disease. [GOC:go_curators] http://amigo.geneontology.org/amigo/term/GO:0042982 2025.1.Hs up
GOBP_ERAD_PATHWAY GO:0036503 M15534 44 0.35766581545009507 1.196313944943644 0.193158953722334 0.8424791997756381 RHBDD1	UBE4B	UBQLN1	TMX1	USP25	CALR	UBXN6	STT3B	TRIM25	USP13	MAN1A2	RNFT2	TMEM259	USP14	RNF121 The protein catabolic pathway which targets endoplasmic reticulum (ER)-resident proteins for degradation by the cytoplasmic proteasome. It begins with recognition of the ER-resident protein	includes retrotranslocation (dislocation) of the protein from the ER to the cytosol	protein modifications necessary for correct substrate transfer (e.g. ubiquitination)	transport of the protein to the proteasome	and ends with degradation of the protein by the cytoplasmic proteasome. [GOC:bf	GOC:PARL	PMID:20940304	PMID:21969857] http://amigo.geneontology.org/amigo/term/GO:0036503 2025.1.Hs up
GOBP_NEGATIVE_REGULATION_OF_IMMUNE_RESPONSE GO:0050777 M15641 51 -0.3521841997630124 -1.195994109832215 0.20315581854043394 0.8424791997756381 PPP3CB	IRAK3	RPS19	BCR	GPX1	IL27RA	YWHAZ	TGFB1	SPI1	SAMHD1	GRB2	GRN	ADAR	CD59 Any process that stops	prevents	or reduces the frequency	rate or extent of the immune response	the immunological reaction of an organism to an immunogenic stimulus. [GOC:ai] http://amigo.geneontology.org/amigo/term/GO:0050777 2025.1.Hs down
GOBP_AXON_EXTENSION GO:0048675 M16466 41 -0.36164211640134536 -1.1899340254074402 0.2035225048923679 0.8424791997756381 FN1	PPP3CB	VCL	SLIT3	BMPR2	CYFIP1	ULK2	LIMK1	PTPRS	ZFYVE27	RTN4	SIN3A	DNM2	TRPV2 Long distance growth of a single axon process involved in cellular development. [GOC:BHF	GOC:dgh	GOC:dph	GOC:jid	GOC:lm	GOC:rl] http://amigo.geneontology.org/amigo/term/GO:0048675 2025.1.Hs down
GOBP_SULFUR_COMPOUND_METABOLIC_PROCESS GO:0006790 M9906 110 0.29981912169190605 1.1886002963370266 0.16772823779193205 0.8424791997756381 AHCY	EXTL3	PAPSS1	HMGCS1	PTER	HS3ST3A1	MICAL2	SUCLG2	PDHX	SULT1A3	SOD2	PDK1	ACSF3	TPST2	MTR	FASN	GUSB	NDST1	DLST	PXYLP1	OGDH	NOX4	ARSG	ACACA	DLAT	PDK3	HACD1	PHGDH	BLMH	ACSL3	CHSY1	ELOVL5	MVK The chemical reactions and pathways involving the nonmetallic element sulfur or compounds that contain sulfur	such as the amino acids methionine and cysteine or the tripeptide glutathione. [GOC:ai] http://amigo.geneontology.org/amigo/term/GO:0006790 2025.1.Hs up
GOBP_PROTEIN_AUTOUBIQUITINATION GO:0051865 M13272 37 0.37044295016219664 1.187126557451822 0.19624217118997914 0.8424791997756381 RNF213	UBE4B	RNF13	UBE3A	RNF19B	SH3RF2	UHRF1	WWP2	RAD18	RNF220 The ubiquitination by a protein of one or more of its own amino acid residues	or residues on an identical protein. Ubiquitination occurs on the lysine residue by formation of an isopeptide crosslink. [GOC:ai] http://amigo.geneontology.org/amigo/term/GO:0051865 2025.1.Hs up
GOBP_ESTABLISHMENT_OF_RNA_LOCALIZATION GO:0051236 M23968 88 0.3071108537453061 1.1841159391786755 0.18126272912423624 0.8424791997756381 NUP214	NUP98	NEAT1	IGF2BP3	FXR1	CPSF6	XPO1	KPNB1	RAN	SETD2	NUP188	POM121C	NUP54	SMG1	HNRNPA2B1	XPO5	NUP107	AKAP8L	UPF2	GLE1 The directed movement of RNA to a specific location. [GOC:ai] http://amigo.geneontology.org/amigo/term/GO:0051236 2025.1.Hs up
GOBP_REGULATION_OF_AXONOGENESIS GO:0050770 M6050 58 -0.33816517111217415 -1.182709132778205 0.20270270270270271 0.8424791997756381 FN1	SIPA1L1	ROBO2	PAK2	UST	MAP2K2	BMPR2	MARK2	BRAF	TIAM2	ULK2	LIMK1	PTPRS	ZFYVE27	PSEN1 Any process that modulates the frequency	rate or extent of axonogenesis	the generation of an axon	the long process of a neuron. [GOC:ai] http://amigo.geneontology.org/amigo/term/GO:0050770 2025.1.Hs down
GOBP_REGULATION_OF_MITOCHONDRION_ORGANIZATION GO:0010821 M12250 44 0.35295053708205215 1.1805423698522919 0.2012072434607646 0.8424791997756381 SQSTM1	PGAM5	MTCH2	TMEM135	MMP9	GSK3B	SPIRE1	BAX	MYO19	AURKA	RHOT1	OMA1	VAT1	FXN Any process that modulates the frequency	rate or extent of a process involved in the formation	arrangement of constituent parts	or disassembly of a mitochondrion. [GOC:dph	GOC:tb] http://amigo.geneontology.org/amigo/term/GO:0010821 2025.1.Hs up
GOBP_PURINE_CONTAINING_COMPOUND_CATABOLIC_PROCESS GO:0072523 M15874 61 -0.3343123676641273 -1.1804751975801882 0.2 0.8424791997756381 GAPDH	DDIT4	HIF1A	NUDT4	TPI1	HK1	GPI	PDE5A	APP	ENO1	ALDOA	SAMHD1	PPARA	COL6A1	PDE7B	STAT3	EP300 The chemical reactions and pathways resulting in the breakdown of a purine-containing compound	i.e. any compound that contains purine or a formal derivative thereof. [GOC:mah] http://amigo.geneontology.org/amigo/term/GO:0072523 2025.1.Hs down
GOBP_NUCLEAR_RECEPTOR_MEDIATED_SIGNALING_PATHWAY GO:0141193 M49582 86 0.3084898571860971 1.1782623750125305 0.17255717255717257 0.8424791997756381 ACTN4	ASXL1	CNOT1	SP100	UBE3A	CNOT2	DDX5	CALR	CYP24A1	ABHD2	KDM1A	FOXP1	GREB1L	ZMIZ1	ZNF536	ALDH1A2	EZH2	PDK3	NR4A3	RXRA	PPARGC1B	MED1	NR3C2 The series of molecular signals initiated by a signaling molecule binding to an intracellular receptor of the nuclear receptor protein family	and ending with regulation of a downstream cellular process	e.g. transcription. [PMID:25614732] http://amigo.geneontology.org/amigo/term/GO:0141193 2025.1.Hs up
GOBP_HORMONE_MEDIATED_SIGNALING_PATHWAY GO:0009755 M12291 86 0.3082753292959346 1.1774429959130845 0.17255717255717257 0.8424791997756381 ACTN4	ASXL1	CNOT1	SP100	UBE3A	CNOT2	DDX5	CALR	CYP24A1	ABHD2	KDM1A	FOXP1	GREB1L	ZMIZ1	ZNF536	ALDH1A2	ADIPOR2	EZH2	NR4A3	RXRA	PPARGC1B	MED1	NR3C2 The series of molecular signals mediated by the detection of a hormone. [GOC:sm] http://amigo.geneontology.org/amigo/term/GO:0009755 2025.1.Hs up
GOBP_EYE_MORPHOGENESIS GO:0048592 M16960 58 0.3329044863006412 1.1765028208386925 0.1962809917355372 0.8424791997756381 COL5A1	BCAR3	ZEB1	STAU2	PHACTR4	PTPRM	AHI1	SKI	LRP5	PRKCI	BAX The process in which the anatomical structures of the eye are generated and organized. [GOC:jid	GOC:mtg_sensu] http://amigo.geneontology.org/amigo/term/GO:0048592 2025.1.Hs up
GOBP_METHYLATION GO:0032259 M15919 71 0.3200427916469537 1.1757822072995658 0.19157894736842104 0.8424791997756381 FBL	PRDM11	METTL15	ASH1L	PCMT1	SETD2	PRDM2	SETD3	GTPBP3	SMYD3	EHMT1	TRMT2B	MTR	RAB6A	DOT1L	KMT2C	EZH2	FAM98A	AS3MT	SLC25A26	TYMS	CARM1	EZH1	NSD1	METTL9	NDUFAF7	PRMT5	WDR4	MTO1	METTL8	METTL5	COMT	PRDM15	KMT2A	SETD5 The process in which a methyl group is covalently attached to a molecule. [GOC:mah] http://amigo.geneontology.org/amigo/term/GO:0032259 2025.1.Hs up
GOBP_CALCIUM_ION_TRANSMEMBRANE_IMPORT_INTO_CYTOSOL GO:0097553 M45214 59 0.3306567240677696 1.1705528753801313 0.19254658385093168 0.8424791997756381 ASPH	CEMIP	FLNA	TRPV1	P2RX1	FKBP1A	PPP3CA	PDE4D	ABL1	JPH1	HTT	GRIN2D	BAX	TRPC1	CHD7 A process in which a calcium ion is transported from one side of a membrane to the other into the cytosol by means of some agent such as a transporter or pore. [GOC:vw] http://amigo.geneontology.org/amigo/term/GO:0097553 2025.1.Hs up
GOBP_NEGATIVE_REGULATION_OF_APOPTOTIC_SIGNALING_PATHWAY GO:2001234 M14668 85 -0.31062437189553427 -1.1699815620696912 0.18992248062015504 0.8424791997756381 TPT1	CD44	CREB3L1	HIF1A	HSPB1	THBS1	PPIA	ZMYND11	YAP1	GPX1	EYA3	ENO1	TERT	GSTP1 Any process that stops	prevents or reduces the frequency	rate or extent of apoptotic signaling pathway. [GOC:mtg_apoptosis] http://amigo.geneontology.org/amigo/term/GO:2001234 2025.1.Hs down
GOBP_NEGATIVE_REGULATION_OF_SUPRAMOLECULAR_FIBER_ORGANIZATION GO:1902904 M25114 65 0.3221788843400427 1.1691530961764245 0.2020618556701031 0.8424791997756381 HSPG2	ATXN7	LDLR	MID1	CLASP1	TBCD	SSH2	MET	NAV3	SLIT2	DYRK1A	ARHGEF2	CTNNA2	MTPN	DIAPH3	TMSB4X	TAOK1	ARAP1	CLASP2 Any process that stops	prevents or reduces the frequency	rate or extent of fibril organization. [GO_REF:0000058	GOC:PARL	GOC:rl	GOC:TermGenie	PMID:23921388] http://amigo.geneontology.org/amigo/term/GO:1902904 2025.1.Hs up
GOBP_POSITIVE_REGULATION_OF_DNA_REPAIR GO:0045739 M13735 59 0.3301141577124453 1.1686321444193444 0.19461697722567287 0.8424791997756381 CREBBP	ACTR2	ERCC6	BABAM1	PRKDC	SPIDR	HELQ	SMARCC1	SMARCA2	SPIRE1	TRIM28	MBTD1	FOXM1	INO80D	DDX11 Any process that activates or increases the frequency	rate or extent of DNA repair. [GOC:go_curators] http://amigo.geneontology.org/amigo/term/GO:0045739 2025.1.Hs up
GOBP_REGULATION_OF_CELL_SIZE GO:0008361 M13531 72 -0.31896581387369066 -1.1648468537293437 0.20881226053639848 0.8424791997756381 FN1	CREB1	HSP90AA1	PUM2	WNK1	BMPR2	ULK2	LIMK1	PTPRS	COL6A1	RHOA	ZFYVE27	AKT1S1	PRR16	ANO6	KCNMA1	RTN4	RAC1	SLC12A6	PLEK	SIN3A	DNM2	TRPV2 Any process that modulates the size of a cell. [GOC:go_curators] http://amigo.geneontology.org/amigo/term/GO:0008361 2025.1.Hs down
GOBP_REGULATION_OF_MICROTUBULE_BASED_PROCESS GO:0032886 M10491 105 0.29643179245598106 1.1641855649665118 0.19444444444444445 0.8424791997756381 POC1B	MEMO1	ATXN7	LAMP1	MID1	CLASP1	XPO1	SKA3	TBCD	STIL	HAUS6	MET	TACC3	NAV3	CAMSAP1	ABL1	DYRK1A	ARHGEF2	GSK3B Any process that modulates the frequency	rate or extent of any cellular process that depends upon or alters the microtubule cytoskeleton. [GOC:mah] http://amigo.geneontology.org/amigo/term/GO:0032886 2025.1.Hs up
GOBP_PROTEIN_PROCESSING GO:0016485 M22825 77 -0.31460832338792216 -1.1620723634151464 0.20616570327552985 0.8424791997756381 RPS6KA2	ECE1	THBS1	SEC11A	PITRM1	LONP2	METAP2	SRGN	PRNP	P4HB	LGMN	ADAM9	ENO1	INPP5B	DYNC2H1	IFT172	SPPL3	RUNX1	CPD Any protein maturation process achieved by the cleavage of a peptide bond or bonds within a protein. Protein maturation is the process leading to the attainment of the full functional capacity of a protein. [GOC:curators	GOC:jl	GOC:jsg] http://amigo.geneontology.org/amigo/term/GO:0016485 2025.1.Hs down
GOBP_CELLULAR_PROCESS_INVOLVED_IN_REPRODUCTION_IN_MULTICELLULAR_ORGANISM GO:0022412 M13832 109 0.29294769902964546 1.1602186940459174 0.20512820512820512 0.8424791997756381 CDYL	POC1B	ZFP57	RHBDD1	STAU2	FXR1	CFAP44	RAN	FBXW11	PPP2R1A	ABHD2	SMARCA2	AFF4	SBF1	CELF1	TPST2	ZFY	BAX	TRIM28	VPS13B	TTLL5	NUP210L	DMC1	AURKA	CCNB1	TTLL1 A process	occurring at the cellular level	that is involved in the reproductive function of a multicellular organism. [GOC:isa_complete] http://amigo.geneontology.org/amigo/term/GO:0022412 2025.1.Hs up
GOBP_REGENERATION GO:0031099 M11315 66 0.31899848948225484 1.1593403239026325 0.2053941908713693 0.8424791997756381 PTPRF	PRRX1	CFLAR	HSPG2	PPP3CA	UCP2	JUN	CCND1	LPIN1	MTR	CTNNA1	MAPK8IP3	AURKA	UPF2	CCNB1	EZH2	ADAM17 The regrowth of a lost or destroyed body part	such as an organ or tissue. This process may occur via renewal	repair	and/or growth alone (i.e. increase in size or mass). [GOC:mah	GOC:pr] http://amigo.geneontology.org/amigo/term/GO:0031099 2025.1.Hs up
GOBP_MICROTUBULE_BASED_MOVEMENT GO:0007018 M3616 156 -0.27833659380669323 -1.1593036595697916 0.1643835616438356 0.8424791997756381 VANGL1	EFCAB6	FNTA	SSX2IP	HIF1A	HSPB1	KIF5B	KTN1	STARD9	KIF20B	APP	VDAC3	CEP128	ACTR3	DYNC1H1	AP3S1	INPP5B	DYNC2H1	DNAAF5	BBS2	KLC1	MAP4	IFT172	IFT46	DNHD1	IFT122	WDR19	KIF7	KIAA0319L	DYNLRB1	ATP2B4	KIF16B	RFX3	NDEL1	ARL8B A microtubule-based process that results in the movement of organelles	other microtubules	or other cellular components. Examples include motor-driven movement along microtubules and movement driven by polymerization or depolymerization of microtubules. [GOC:cjm	ISBN:0815316194] http://amigo.geneontology.org/amigo/term/GO:0007018 2025.1.Hs down
GOBP_IMPORT_INTO_NUCLEUS GO:0051170 M23961 92 -0.29959090987213094 -1.1558799085786051 0.2 0.8424791997756381 RBM22	EIF4ENIF1	BACH2	HSP90AA1	CHP1	UBR5	POM121	PHB2	EI24	E2F3	TNPO3	TERT	NUP153	SUFU	HSPA12A	TGFB1	SEC13	JUP	KPNA5	NUP155	STAT3	EP300	ADAR	PSEN1	EPM2A	PIK3R1	NF1 The directed movement of substances into the nucleus. [GOC:ai] http://amigo.geneontology.org/amigo/term/GO:0051170 2025.1.Hs down
GOBP_RENAL_SYSTEM_DEVELOPMENT GO:0072001 M45915 126 0.2863308148455927 1.1547486777600549 0.18277310924369747 0.8424791997756381 DLG1	ASXL1	CFLAR	PLXND1	C1orf54	PCSK5	TIPARP	HS3ST3A1	PODXL	GLIS2	AHI1	MMP9	PPP3CA	ADAMTS6	SDC4	SLIT2	FGFR1	KLHL3	MTSS1	BAX	NUP107	GREB1L	WDPCP	GFRA1	LAMA5	ALDH1A2	EZH2	NDUFS6 The process whose specific outcome is the progression of the renal system over time	from its formation to the mature structure. The renal system maintains fluid balance and contributes to electrolyte balance	acid/base balance	and disposal of nitrogenous waste products. In humans	the renal system comprises a pair of kidneys	a pair of ureters	urinary bladder	urethra	sphincter muscle and associated blood vessels. [GOC:mtg_kidney_jan10	GOC:yaf	PMID:6996269] http://amigo.geneontology.org/amigo/term/GO:0072001 2025.1.Hs up
GOBP_B_CELL_ACTIVATION GO:0042113 M10657 94 -0.2989514943533614 -1.1537233964016096 0.20610687022900764 0.8424791997756381 TNFRSF21	MLH1	THEMIS2	HDAC5	PAX5	RBPJ	PHB2	ITFG2	YY1	TFRC	ATM	IL27RA	STAT5B	HMCES	TP53BP1	TGFB1	SKAP2	SPI1	EP300	PIK3R1	NFAM1	ERCC1	NFATC2	DOCK11	CD320	PRKCB	ADA	PLCG2	MEF2C	PCYT1A	EPHB2	HSPD1	SYK	MSH6	ATAD5	CTPS1	LAPTM5 The change in morphology and behavior of a mature or immature B cell resulting from exposure to a mitogen	cytokine	chemokine	cellular ligand	or an antigen for which it is specific. [GOC:mgi_curators	ISBN:0781735149] http://amigo.geneontology.org/amigo/term/GO:0042113 2025.1.Hs down
GOBP_EPITHELIAL_TUBE_MORPHOGENESIS GO:0060562 M24183 119 0.28792362868055055 1.1493772980542276 0.17857142857142858 0.8424791997756381 DLG1	SCRIB	PLXND1	C1orf54	PHACTR4	STIL	HS3ST3A1	STK3	PODXL	MICAL2	AHI1	MET	ADAMTS12	MIB1	SDC4	SLIT2	ABL1	SKI	KLHL3	LRP5	FOXP1	CELSR1	MTSS1 The process in which the anatomical structures of a tube are generated and organized from an epithelium. Epithelial tubes transport gases	liquids and cells from one site to another and form the basic structure of many organs and tissues	with tube shape and organization varying from the single-celled excretory organ in Caenorhabditis elegans to the branching trees of the mammalian kidney and insect tracheal system. [GOC:dph] http://amigo.geneontology.org/amigo/term/GO:0060562 2025.1.Hs up
GOBP_STEM_CELL_DIFFERENTIATION GO:0048863 M15304 102 -0.292711967601682 -1.1477592540737866 0.20446096654275092 0.8424791997756381 FN1	SEMA4G	HIF1A	EXT1	RBPJ	MLLT3	SEMA3C	YAP1	CHD2	RUNX2	OVOL2	LTBP3	MTA1	ERCC2	PTN	SMAD1	BMPR2	PUM1 The process in which a relatively unspecialized cell acquires specialized features of a stem cell. A stem cell is a cell that retains the ability to divide and proliferate throughout life to provide progenitor cells that can differentiate into specialized cells. [CL:0000034	GOC:isa_complete] http://amigo.geneontology.org/amigo/term/GO:0048863 2025.1.Hs down
GOBP_NUCLEOSIDE_TRIPHOSPHATE_METABOLIC_PROCESS GO:0009141 M13168 95 -0.2980312044547706 -1.1470030679912524 0.21011673151750973 0.8424791997756381 ADK	GAPDH	DDIT4	HIF1A	TPI1	HK1	NUDT5	GPI	NDUFB2	APP	ENO1	ALDOA	VCP	SLC25A13	TGFB1	NDUFS3	SAMHD1	PPARA	COL6A1	CAD	STAT3	EP300	PSEN1	NDUFA12 The chemical reactions and pathways involving a nucleoside triphosphate	a compound consisting of a nucleobase linked to a deoxyribose or ribose sugar esterified with triphosphate on the sugar. [GOC:go_curators	ISBN:0198506732] http://amigo.geneontology.org/amigo/term/GO:0009141 2025.1.Hs down
GOBP_REGULATION_OF_INTRACELLULAR_TRANSPORT GO:0032386 M16149 116 -0.28595908680850024 -1.1468587598252393 0.18317757009345795 0.8424791997756381 RBM22	BARD1	HSP90AA1	CHP1	PTPN11	UBR5	RAB11FIP3	EI24	USP7	KIF20B	ALKBH5	YWHAE	NUP153	DYNC1H1	RANGAP1	EHD2	WNK1	VPS11	EDEM2	MAP2K2	SUFU	PGAP1	TGFB1	JUP	NF2	TM9SF4	STX18	NDEL1	EP300	EDEM1	VPS35	PSEN1	EPM2A	PIK3R1	CHMP3	NF1 Any process that modulates the frequency	rate or extent of the directed movement of substances within cells. [GOC:mah] http://amigo.geneontology.org/amigo/term/GO:0032386 2025.1.Hs down
GOBP_REGULATION_OF_AUTOPHAGY GO:0010506 M10281 146 -0.27611697525400897 -1.1417474628068915 0.18095238095238095 0.8424791997756381 EEF1A1	UVRAG	GAPDH	FBXW7	SNX5	HIF1A	HSPB1	VDAC1	EXOC7	BNIP3L	HUWE1	ATM	EIF2AK1	UBR4	CAPNS1	ITPR1	WIPI1	TMEM59	WNK1	LEPR	ATF6	ATP6V1E1	GPR137B	AMBRA1	ATP6V0B	ULK2	VPS13D	EIF4G3	KEAP1	STAT3	EP300	PIP4K2A Any process that modulates the frequency	rate or extent of autophagy. Autophagy is the process in which cells digest parts of their own cytoplasm. [GOC:dph	GOC:tb] http://amigo.geneontology.org/amigo/term/GO:0010506 2025.1.Hs down
GOBP_REGULATION_OF_MRNA_METABOLIC_PROCESS GO:1903311 M29343 134 0.2802719399858055 1.1412370077037377 0.2070393374741201 0.8424791997756381 CNOT6L	TAF15	DAZAP1	CARHSP1	NUP98	IGF2BP3	CNOT1	CNOT10	SLTM	FXR1	TNRC6B	TRA2B	RBM39	CNOT2	CNOT6	DDX5	PTBP1	PAN3	RBM4	SAMD4A	NBAS	ZC3HAV1	DYRK1A	CNOT11	CPEB1	SRSF4 Any process that modulates the frequency	rate or extent of mRNA metabolic process. [GO_REF:0000058	GOC:TermGenie	GOC:vw] http://amigo.geneontology.org/amigo/term/GO:1903311 2025.1.Hs up
GOBP_SENSORY_PERCEPTION GO:0007600 M14699 107 -0.28829555824682646 -1.1379525936554953 0.2101313320825516 0.8424791997756381 CCDC50	NAV2	EFEMP1	PPT1	PITPNA	CEP250	TULP2	DHRS3	GPX1	SPATA7	EYA3	GNB1	BBS2	DIAPH1	ATF6	RABGGTA	PGAP1	ALDH7A1	PAX3	MYO6	COL6A1	MGLL	RABGGTB	EPAS1	MYH14	CDKN1B	EYA1	CDC14A	SCNN1A The series of events required for an organism to receive a sensory stimulus	convert it to a molecular signal	and recognize and characterize the signal. This is a neurological process. [GOC:ai	GOC:dph] http://amigo.geneontology.org/amigo/term/GO:0007600 2025.1.Hs down
GOBP_TISSUE_MORPHOGENESIS GO:0048729 M16103 220 0.2583490561158217 1.1327677475229954 0.18003913894324852 0.8424791997756381 COL5A1	DLG1	FERMT2	SCRIB	PLXND1	UBE4B	TXNRD1	C1orf54	PHACTR4	CLASP1	FLNA	MYO9A	STIL	ARHGAP12	HS3ST3A1	AXIN1	STK3	PODXL	MICAL2	AHI1	FKBP1A	MET	RREB1	ADAMTS12	MIB1	SDC4	SLIT2	FGFR1	ABL1	SKI	KLHL3	ROBO1	LRP5	FOXP1	CELSR1	MTSS1	TRIM28 The process in which the anatomical structures of a tissue are generated and organized. [GOC:dph	GOC:jid] http://amigo.geneontology.org/amigo/term/GO:0048729 2025.1.Hs up
GOBP_MACROAUTOPHAGY GO:0016236 M11871 167 -0.269124349432271 -1.1278236768631007 0.19577735124760076 0.8424791997756381 UVRAG	GAPDH	FBXW7	SNX5	HIF1A	VDAC1	PHB2	EXOC7	EI24	BNIP3L	RAB2A	CHMP4A	CHMP5	HUWE1	ATM	PACS2	EIF2AK1	CAPNS1	WIPI1	ATP6V1E1	VCP	AMBRA1	MTMR3	ATP6V0B	VTI1B	RAB7A	ULK2	VPS13D	ATG3	PIP4K2A	ARL8B	MFN2	GABARAP	ATP2A2	VPS35	AP4M1	PDCD6IP	PSEN1	NSFL1C	EPM2A	CHMP3	ABI2	VPS13C	TECPR1	PINK1 The autophagic process that proceeds via the formation of an autophagosome. [PMID:24366339] http://amigo.geneontology.org/amigo/term/GO:0016236 2025.1.Hs down
GOBP_POSITIVE_REGULATION_OF_CELL_DEVELOPMENT GO:0010720 M15451 159 -0.2704157781150518 -1.1275185881193128 0.1976284584980237 0.8424791997756381 FN1	DICER1	CREB1	ARID1B	ACTB	HIF1A	CUX1	CAPRIN1	ROBO2	NPTN	NAP1L1	TGM2	STAT5B	PTN	MAP2K2	ZBTB16	BMPR2	ETV5	VEGFC	TGFB1	PRKCA	AMBRA1	BRAF	SPI1	TIAM2	RUNX1	LIMK1	WDR62	RFX3	EP300	BAIAP2	RHOA	ZFYVE27 Any process that increases the rate	frequency or extent of the progression of the cell over time	from its formation to the mature structure. Cell development does not include the steps involved in committing a cell to a specific fate. [GOC:BHF	GOC:dph	GOC:tb] http://amigo.geneontology.org/amigo/term/GO:0010720 2025.1.Hs down
GOBP_REGULATION_OF_TRANSLATION GO:0006417 M17196 183 -0.2645193600945967 -1.1274161310036068 0.17248062015503876 0.8424791997756381 EIF4ENIF1	RPL13A	GAPDH	CDK5RAP1	EIF3E	PABPC1	RPL5	HSPB1	CAPRIN1	THBS1	PUM2	EIF4B	RPS27L	METAP2	EEFSEC	EIF4A3	ALKBH5	APP	ENC1	EIF2AK1	EIF2AK3	PATL2	RPS14	CTIF	RPS3	EEF2	EIF4EBP2	CYFIP1	PUM1	EIF3H	PRKCA	TNRC6C	ETF1	RPS4X	LARP4 Any process that modulates the frequency	rate or extent of the chemical reactions and pathways resulting in the formation of proteins by the translation of mRNA or circRNA. [GOC:isa_complete] http://amigo.geneontology.org/amigo/term/GO:0006417 2025.1.Hs down
GOBP_GLYCEROLIPID_METABOLIC_PROCESS GO:0046486 M12061 137 -0.2746126019242129 -1.1256718755527422 0.20610687022900764 0.8424791997756381 UVRAG	FBXW7	LPCAT1	PTPN11	PHB2	PRDX6	GPX1	ATM	SERINC2	INPP5B	PIGL	LPIN2	CPT1A	GK	PIP5K1C	PGAP1	GDE1	ACP6	MTMR3	CDS2	ITPKC	PLA2G4A	PTDSS1	SCARB1	INPPL1	PI4KA	PIGP	MGLL	PIP4K2A	SERINC1	PIK3R1	PIGN	CAPN2	DDHD1	PIK3CG	PLCB4 The chemical reactions and pathways involving glycerolipids	any lipid with a glycerol backbone. Diacylglycerol and phosphatidate are key lipid intermediates of glycerolipid biosynthesis. [GOC:ai	PMID:8906569] http://amigo.geneontology.org/amigo/term/GO:0046486 2025.1.Hs down
GOBP_REGULATION_OF_CYTOSKELETON_ORGANIZATION GO:0051493 M15989 209 0.25924337778235224 1.124497182726402 0.19797979797979798 0.8424791997756381 PTK2	DLG1	FERMT2	POC1B	CCL24	STAU2	ATXN7	MID1	CLASP1	FLNA	SKA3	TBCD	SEMA5A	STIL	ABL2	SSH2	HAUS6	MET	TACC3	NAV3	SDC4	SLIT2	CAMSAP1	ABL1	DYRK1A	ARHGEF2	GSK3B	CTNNA2	RICTOR	RHOG	MTPN	CELSR1	MTSS1	DIAPH3	CCNF	TMSB4X	CTTN	LPAR1	ARHGEF10L	TAOK1	ARAP1	CLASP2 Any process that modulates the frequency	rate or extent of the formation	arrangement of constituent parts	or disassembly of cytoskeletal structures. [GOC:ai] http://amigo.geneontology.org/amigo/term/GO:0051493 2025.1.Hs up
GOBP_POST_TRANSCRIPTIONAL_REGULATION_OF_GENE_EXPRESSION GO:0010608 M12155 248 -0.25516833568712366 -1.1235960515085839 0.17357001972386588 0.8424791997756381 DICER1	EIF4ENIF1	RPL13A	GAPDH	APEX1	CDK5RAP1	EIF3E	VIM	PABPC1	MLH1	RPL5	HSPB1	CAPRIN1	THBS1	PUM2	EIF4B	MAPKAPK2	RPS27L	RBM33	AXIN2	METAP2	EEFSEC	EIF4A3	ALKBH5	APP	FTO	ENC1	EIF2AK1	EIF2AK3	PATL2	RPS14	CTIF	RPS3	EEF2	PABPC4	EIF4EBP2	ZCCHC17	CYFIP1	PUM1	TGFB1	EIF3H	PRKCA	TNRC6C	ETF1	RPS4X	LARP4 Any process that modulates the frequency	rate or extent of gene expression after the production of an RNA transcript. [GOC:dph	GOC:tb] http://amigo.geneontology.org/amigo/term/GO:0010608 2025.1.Hs down
GOBP_ENDOMEMBRANE_SYSTEM_ORGANIZATION GO:0010256 M13914 243 -0.25281105898284406 -1.1129501883215571 0.1992110453648915 0.8424791997756381 RPH3AL	CREB1	NOMO1	CAMLG	VAPB	PDE4DIP	ARL1	STX5	RAB2A	EMC1	CHMP4A	SRGN	NOMO3	VDAC2	CHMP5	HUWE1	NPLOC4	SERINC2	TMED4	STXBP1	SERINC3	EHD2	USO1	EIF2AK3	AP3S1	UBR4	YWHAZ	DYNC2H1	SNX19	DCAF17	WNK1	EMC2	VPS11	HPS4	MAP2K2	AP1B1	AGFG1	PRKCA	VAPA	ATP6V0B	VTI1B	RAB7A	SNX9	KIAA0319L	NUP155	MVB12B	COL6A1	PLEKHM2	ANXA8	STX18
GOBP_REGULATION_OF_ANATOMICAL_STRUCTURE_MORPHOGENESIS GO:0022603 M7769 302 0.24626658853505518 1.1090843934158006 0.18533604887983707 0.8424791997756381 PTK2	DLG1	FERMT2	MYH9	HSPB6	ETS1	NFATC3	CORO1C	GAS2	CCL24	ANKRD27	PLXND1	HSPG2	STAU2	PGAM5	SP100	MTCH2	TMEM135	BVES	MYO9A	SEMA5A	PTPRM	ITGB2	AKT3	LPAR3	ZRANB1	PRKDC	AHI1	LRP8	RREB1	ADAMTS12	PPP3CA	PKM	FMNL2	WTIP	DNMBP	SLIT2	FGFR1	CAMSAP1	ABL1	GSK3B	ROBO1	RHOG	CUX2	FOXP1	SPIRE1	RYK	SEMA6A Any process that modulates the frequency	rate or extent of anatomical structure morphogenesis. [GOC:mah] http://amigo.geneontology.org/amigo/term/GO:0022603 2025.1.Hs up
GOBP_CELLULAR_RESPONSE_TO_NITROGEN_COMPOUND GO:1901699 M13878 244 -0.25194171624492356 -1.1084294597224271 0.19960474308300397 0.8424791997756381 ATP2B1	CREB1	SNX5	VIM	ACTB	SSH1	HDAC5	PKD2	HTR7	PTPN11	JAK1	FBN1	RGS10	PRNP	CHMP5	ABCC1	RAB31	LGMN	TGM2	APP	SYAP1	NCOA2	RANGAP1	USO1	GSTP1	GNB1	AP3S1	STAT5B	ITPR1	RAPGEF1	POR	NFKB1	LPIN2	DIAPH1	EIF4EBP2	CRKL	TGFB1	PRKCA	GNAI2	ATRX	JUP	TYK2	GRB2	COL6A1	ATP2B4	ICAM1	STAT3	NDEL1	EP300	BAIAP2
GOBP_TUBE_MORPHOGENESIS GO:0035239 M18329 317 0.24582365599709316 1.1084176316725962 0.1680327868852459 0.8424791997756381 PTK2	DLG1	MYH9	HSPB6	ETS1	NFATC3	RNF213	PRRX1	CCL24	ZEB1	SCRIB	PLXND1	HSPG2	SP100	LDLR	C1orf54	PHACTR4	SEMA5A	STIL	TIPARP	PTPRM	ITGB2	HS3ST3A1	AKT3	STK3	PODXL	MICAL2	AHI1	MET	ADAMTS12	JUN	PKM	MIB1	SDC4	SLIT2	CCDC134	FGFR1	ABL1	SKI	NPRL3	KLHL3	ROBO1	LRP5	ANXA2	HDAC9	FOXP1	CELSR1	SEMA6A	MTSS1	BAX The process in which the anatomical structures of a tube are generated and organized. Epithelial and endothelial tubes transport gases
GOBP_CELLULAR_HOMEOSTASIS GO:0019725 M5826 260 -0.2496739894384722 -1.107719871782304 0.1926070038910506 0.8424791997756381 TPT1	ATP2B1	FBXW7	APEX1	HIF1A	ANXA6	PPT1	HK1	VAPB	PPP3CB	CHP1	MT1E	PKD2	SLC31A1	PRDX6	CACNA1C	NPTN	ATP1B3	PRNP	GPX1	TFRC	TXN2	TGM2	YWHAE	BOLA2	APP	TMEM165	PACS2	GSTP1	ALDOA	ITPR1	WNK1	SMAD1	DIAPH1	ATP6V1E1	TGFB1	AMBRA1	ATP6V0B	UNC13B	RAB7A	ATP2B4	TM9SF4	ICAM1	GRN	SLC9A7	ATP13A1	ATP2A2	SLC39A8	GSR	GRINA
GOBP_POSITIVE_REGULATION_OF_CATABOLIC_PROCESS GO:0009896 M12781 234 0.25065212665966885 1.1053808072293883 0.20916334661354583 0.8424791997756381 MALAT1	ZYG11B	PTK2	CNOT6L	SQSTM1	NEAT1	RHBDD1	CNOT1	CNOT10	CLSTN3	LDLR	FXR1	ZC3H18	UBQLN1	TNRC6B	TIPARP	CNOT2	AXIN1	TMX1	CNOT6	FBXO7	DAGLB	PAN3	SAMD4A	CCNY	SETD2	MID2	ZC3HAV1	DET1	NPRL3	SH3RF2	GSK3B	CNOT11	ATG7	HTT	AKT2	VGLL4	SNX1	CELF1	BAX	GPSM1	GGA3	SESN2	ECSCR	USP13	AURKA	AGO3	AGO2	FOXO3	RNFT2
GOBP_RESPONSE_TO_ABIOTIC_STIMULUS GO:0009628 M14159 407 -0.23787476217409853 -1.105209145405652 0.16432865731462926 0.8424791997756381 TIMP1	COL6A3	FBXW7	CREB1	PER2	BARD1	DDIT4	STX1A	HSP90AA1	HIF1A	CCND2	CNN2	HSPB1	THBS1	COL6A2	EXT1	CHP1	PLOD1	PKD2	GPSM2	PTPN11	MAPKAPK2	CEP250	EI24	BNIP3L	GPI	YY1	YAP1	GPX1	TFRC	ATM	ALKBH5	P4HB	LGMN	YWHAE	EYA3	APP	ENO1	TERT	EIF2AK3	RCSD1	MTA1	ITPR1	ERCC2	PTN	WNK1	NFKB1	HIPK2	CPT1A	HSP90AB1
GOBP_REGULATION_OF_PROTEIN_MODIFICATION_PROCESS GO:0031399 M17904 266 -0.2477523080568015 -1.1029897730901779 0.19223300970873786 0.8424791997756381 FN1	UVRAG	CEP85	TCF25	FBXW7	CDK5RAP1	PER2	RPL5	HSP90AA1	HIF1A	RPL11	CAMLG	HSPB1	CHP1	RPS2	PPIA	WDFY2	FBN1	CHFR	MMD	NPTN	UBA2	HUWE1	FBXO33	SYAP1	TOM1L1	PAK2	MTA1	NXN	RPS3	WNK1	MAP2K2	HSP90AB1	VCP	MAP3K4	TGFB1	BRAF	NNMT	STK38	SNX9	TGFBR1	CDC14B	DCUN1D4	EP300	RHOA	CDC25A	GABARAP	ADAR	AKT1S1	EPAS1
GOBP_REGULATION_OF_CATABOLIC_PROCESS GO:0009894 M12729 435 -0.23596710153125353 -1.100475310901847 0.17706237424547283 0.8424791997756381 TIMP1	EIF4ENIF1	EEF1A1	UVRAG	GAPDH	FBXW7	SNX5	APEX1	LPCAT1	VIM	PABPC1	MLH1	BARD1	DDIT4	RPL5	HSP90AA1	HIF1A	RPL11	CAMLG	HSPB1	CAPRIN1	CST3	PUM2	IRAK3	VDAC1	EXOC7	TGFB1I1	MAPKAPK2	LONP2	CHFR	SUMO2	RBM33	STX5	BNIP3L	AXIN2	USP7	EIF4A3	HUWE1	GPX1	ATM	ALKBH5	ADAM9	APP	FTO	EIF2AK1	PATL2	UBR4	CAPNS1	ITPR1	WIPI1
GOBP_REGULATION_OF_RESPONSE_TO_EXTERNAL_STIMULUS GO:0032101 M14548 320 0.2431908207245585 1.0995951721156536 0.19183673469387755 0.8424791997756381 PTPRF	PTK2	SQSTM1	ETS1	CREBBP	RNF216	NEAT1	CCL24	EXTL3	DHX33	LAMP1	LDLR	INPP5D	FXR1	CLASP1	UBQLN1	NCR1	DUSP3	NEK7	ERCC6	SEMA5A	ASH1L	TMX1	PRKDC	CALR	LRP8	MMP9	DAGLB	MET	PPP2R3C	ADAMTS12	SLIT2	ZC3HAV1	CCDC134	IFNLR1	DROSHA	LSM14A	FGFR1	FANCA	TRIM25	CTNNA2	ROBO1	RICTOR	FLOT2	ANXA2	FOXP1	RYK	CELF1	MAPKBP1	SLC19A1
GOBP_MRNA_METABOLIC_PROCESS GO:0016071 M5804 316 -0.24258386167978835 -1.0995179268419493 0.20930232558139536 0.8424791997756381 RBM22	EIF4ENIF1	HNRNPA1L2	CREB1	APEX1	EIF3E	VIM	SUGP2	PABPC1	CPSF2	MLH1	PCBP2	BARD1	CPSF1	SAFB	CAPRIN1	TAF4B	PUM2	RPRD1B	SND1	MAPKAPK2	MBNL2	PRDX6	DDX17	CSTF3	RBM33	RBPMS	AXIN2	TAF12	SRSF11	EIF4A3	ATM	ALKBH5	CDC5L	ZCCHC7	FTO	NCOA2 The chemical reactions and pathways involving mRNA	messenger RNA	which is responsible for carrying the coded genetic 'message'	transcribed from DNA	to sites of protein assembly at the ribosomes. [ISBN:0198506732] http://amigo.geneontology.org/amigo/term/GO:0016071 2025.1.Hs down
GOBP_EXPORT_FROM_CELL GO:0140352 M42984 292 -0.24431868547748892 -1.0993394617401278 0.2034548944337812 0.8424791997756381 MCTP2	ATP2B1	RPH3AL	CREB1	PER2	CREB3L1	STX1A	HIF1A	PPT1	PPP3CB	PTPN11	PPIA	EXOC7	RAB11FIP3	ABCC4	BCR	ATP1B3	KIF5B	SEC24A	TVP23C	ABCC1	RAB31	TGM2	STXBP1	YWHAE	ADAM9	ITPR1	SNX19	VPS11	CPT1A	FRMD4A	WLS	VEGFC	PIP5K1C	AP1B1	CBL	TGFB1	PRKCA	GNAI2	BRAF	LTBP2	RAB40C	MYO1G	SPI1	VTI1B	NEDD4L	UNC13B	PDIA4	RAB7A	PLA2G4A
GOBP_CELL_ADHESION GO:0007155 M45069 469 -0.2323021954624609 -1.0919692687404956 0.1693227091633466 0.8424791997756381 FN1	LMO7	COL6A3	ARHGAP6	TNFRSF21	MYL9	SSX2IP	CD44	ARID1B	FAT3	ACTB	PDZD2	LAMC1	HSPB1	LPP	THBS1	COL6A2	THEMIS2	ITGB4	EXT1	RSU1	RBPJ	TLN1	CD99L2	PTPN11	ROBO2	PPIA	JAK1	TGFB1I1	PAG1	DDR1	FBLIM1	FBN1	LAMB1	CD164	MKLN1	BCR	NPTN	SPECC1L	PRNP	TFRC	ATM	ITGB5	PPFIA1	P4HB	TGM2	STXBP1	ADAM9	APP	MYO10
GOBP_REGULATION_OF_LOCOMOTION GO:0040012 M45143 356 0.23831141835793496 1.084618530226999 0.20766129032258066 0.8424791997756381 MALAT1	ACTN4	PTK2	FERMT2	ZNF609	ETS1	CORO1C	CCL24	CEMIP	PLXND1	SP100	CADM4	KRT5	BVES	CLASP1	DUSP3	FLNA	SEMA5A	PTPRM	AKT3	PODXL	FBXO7	ABL2	SMURF2	CALR	MMP9	MET	RREB1	NAV3	PPP3CA	DOCK7	JUN	DUSP22	ELP3	SDC4	SLIT2	RRAS2	FGFR1	ABL1	ABHD2	SOD2	SH3RF2	ARHGEF2	GSK3B	CTNNA2	ROBO1	RICTOR	ABHD6	AKT2	HDAC9
GOBP_POSITIVE_REGULATION_OF_TRANSCRIPTION_BY_RNA_POLYMERASE_II GO:0045944 M23765 448 0.23140449301276947 1.0806924764244128 0.21 0.8424791997756381 ACTN4	ZNF609	SQSTM1	ETS1	ASXL1	GLIS3	NFATC3	CREBBP	ACTR2	PRRX1	ZEB1	ZNF292	ZBTB49	MED13L	MLLT6	SP100	NFIC	NRIP1	TBP	UBE3A	KAT6B	ZNF148	FOXK2	ERCC6	ASH1L	MICAL2	CREB3L2	PRKDC	GLIS2	PTBP1	AHI1	FOXJ3	MYBL2	MLLT10	HINFP	MET	RREB1	PPP3CA	JUN	CHCHD2	PKM	SMARCC1	CREM	EAF2	KLF6	PRDM2	ABL1	SKI	SETD3	ARHGEF2
GOBP_POSITIVE_REGULATION_OF_CELLULAR_COMPONENT_ORGANIZATION GO:0051130 M634 423 0.23191043590737198 1.0785959715945574 0.208984375 0.8424791997756381 DLG1	CNOT6L	FERMT2	ASAP1	CORO1C	ACTR2	FIG4	POC1B	CFLAR	CCL24	ANKRD27	PLEKHM1	PLXND1	STAU2	PGAM5	B2M	CNOT1	DHX33	CLSTN3	CLASP1	DUSP3	FLNA	SKA3	NEK7	SEMA5A	STIL	CNOT2	NUSAP1	CNOT6	LPAR3	ABL2	AHI1	CALR	LRP8	CCT3	SPIDR	MMP9	PAN3	MET	RREB1	NAV3	PPP3CA	MIB1	SDC4	SLIT2	FGFR1	ABL1	GSK3B	ANAPC7	EHD1
GOBP_REGULATION_OF_SMALL_MOLECULE_METABOLIC_PROCESS GO:0062012 M24323 100 -0.29491369898179354 -1.1515366230310509 0.21092278719397364 0.8425692190567777 CREB1	DDIT4	HIF1A	LONP2	IGFBP4	USP7	ME2	APP	ENO1	NCOA2	UBR4	LEPR	NFKB1	CPT1A	VCP	ANGPTL4	ME1	NNMT	PPARA	ATP2B4	STAT3	EP300	PSEN1	DCAF5	CLK2	PINK1	PLEK	CD320	GNAI1	LCMT1 Any process that modulates the rate	frequency or extent of a small molecule metabolic process. [GOC:vw] http://amigo.geneontology.org/amigo/term/GO:0062012 2025.1.Hs down
GOBP_REGULATION_OF_POSTSYNAPSE_ASSEMBLY GO:0150052 M48533 20 -0.4426614983280191 -1.2222034975037268 0.21370967741935484 0.8430684248039914 PUM2	NEDD8	DOCK1	VPS35	RTN4	RAC1	ELMO1	SYNDIG1	UBE3B Any process that modulates the frequency	rate or extent of postsynapse assembly	the aggregation	arrangement and bonding together of a set of components to form a postsynapse. [GOC:aruk	GOC:bc	PMID:16394100	PMID:16672654	PMID:28185854] http://amigo.geneontology.org/amigo/term/GO:0150052 2025.1.Hs down
GOBP_REGULATION_OF_MITOCHONDRIAL_FISSION GO:0090140 M13263 17 0.4516037676414311 1.2145612883158057 0.2147117296222664 0.8430684248039914 PGAM5	TMEM135	SPIRE1	MYO19	AURKA Any process that modulates the rate	frequency or extent of mitochondrial fission. Mitochondrial fission is the division of a mitochondrion within a cell to form two or more separate mitochondrial compartments. [GOC:ascb_2009	GOC:dph	GOC:tb] http://amigo.geneontology.org/amigo/term/GO:0090140 2025.1.Hs up
GOBP_REGULATION_OF_SMOOTH_MUSCLE_CELL_DIFFERENTIATION GO:0051150 M10749 16 0.4546812800566314 1.211571596346302 0.2147117296222664 0.8430684248039914 NFATC3	ZEB1	SOD2	NFATC1	PIAS1	RBPMS2 Any process that modulates the frequency	rate or extent of smooth muscle cell differentiation. [CL:0000192	GOC:ai] http://amigo.geneontology.org/amigo/term/GO:0051150 2025.1.Hs up
GOBP_PROTEIN_ACYLATION GO:0043543 M15586 29 0.39548413861354736 1.2038186110100795 0.214 0.8430684248039914 CDYL	CREBBP The addition of an acyl group	any group or radical of the form RCO- where R is an organic group	to a protein amino acid. [GOC:jl] http://amigo.geneontology.org/amigo/term/GO:0043543 2025.1.Hs up
GOBP_NEGATIVE_REGULATION_OF_TOR_SIGNALING GO:0032007 M13058 36 -0.3747908420388885 -1.200252580286958 0.21346153846153845 0.8430684248039914 DDIT4	HIF1A	USP7	ITFG2	ATM	YWHAZ	SEC13	PREX1	NLK	AKT1S1	EPM2A	RPS6KA1 Any process that stops	prevents	or reduces the frequency	rate or extent of TOR signaling. [GOC:mah] http://amigo.geneontology.org/amigo/term/GO:0032007 2025.1.Hs down
GOBP_STRIATED_MUSCLE_CONTRACTION GO:0006941 M19924 55 0.3312687950116386 1.1625847107922076 0.2151639344262295 0.8430684248039914 DLG1	ASPH	DTNA	FLNA	FKBP1A	PDE4D	PDE4B	JPH1 A process in which force is generated within striated muscle tissue	resulting in the shortening of the muscle. Force generation involves a chemo-mechanical energy conversion step that is carried out by the actin/myosin complex activity	which generates force through ATP hydrolysis. Striated muscle is a type of muscle in which the repeating units (sarcomeres) of the contractile myofibrils are arranged in registry throughout the cell	resulting in transverse or oblique striations observable at the level of the light microscope. [GOC:jl	GOC:mtg_muscle	ISBN:0198506732] http://amigo.geneontology.org/amigo/term/GO:0006941 2025.1.Hs up
GOBP_POSITIVE_REGULATION_OF_NERVOUS_SYSTEM_DEVELOPMENT GO:0051962 M11606 96 -0.2970317617695121 -1.1454898727657445 0.2131782945736434 0.8430684248039914 FN1	DICER1	HIF1A	CUX1	CAPRIN1	ROBO2	NPTN	NAP1L1	TGM2	PTN	MAP2K2	BMPR2	ETV5	VEGFC	TGFB1	PRKCA	BRAF	TIAM2	LIMK1	WDR62	BAIAP2	ZFYVE27 Any process that activates	maintains or increases the frequency	rate or extent of nervous system development	the origin and formation of nervous tissue. [GOC:ai] http://amigo.geneontology.org/amigo/term/GO:0051962 2025.1.Hs down
GOBP_TELENCEPHALON_DEVELOPMENT GO:0021537 M15958 103 0.2919047106877741 1.1428832142340897 0.21367521367521367 0.8430684248039914 CORO1C	ARHGAP11B	HERC1	FXR1	FLNA	TRA2B	LRP8	RAN	TACC3	SLIT2	SKI	GSK3B	DCLK2	ROBO1	KDM1A	SUN1	FOXP1	RYK	BAX	VPS13B	OGDH	ZMIZ1	CHD7	SOCS7	LPAR1	WDR37	EZH2	XRN2	NR4A3 The process whose specific outcome is the progression of the telencephalon over time	from its formation to the mature structure. The telencephalon is the paired anteriolateral division of the prosencephalon plus the lamina terminalis from which the olfactory lobes	cerebral cortex	and subcortical nuclei are derived. [GO_REF:0000021	GOC:cls	GOC:dgh	GOC:dph	GOC:jid	PMID:12626695] http://amigo.geneontology.org/amigo/term/GO:0021537 2025.1.Hs up
GOBP_MRNA_CATABOLIC_PROCESS GO:0006402 M49337 116 -0.2820566681306305 -1.1312078389359246 0.21495327102803738 0.8430684248039914 EIF4ENIF1	APEX1	EIF3E	VIM	PABPC1	MLH1	CAPRIN1	PUM2	SND1	MAPKAPK2	RBM33	AXIN2	EIF4A3	ATM	ALKBH5	ZCCHC7	FTO	PATL2	CTIF	PABPC4	SMG5	PUM1	PRKCA	TNRC6C	ETF1	DIS3L The chemical reactions and pathways resulting in the breakdown of mRNA	messenger RNA	which is responsible for carrying the coded genetic 'message'	transcribed from DNA	to sites of protein assembly at the ribosomes. [ISBN:0198506732] http://amigo.geneontology.org/amigo/term/GO:0006402 2025.1.Hs down
GOBP_POSITIVE_REGULATION_OF_ORGANELLE_ORGANIZATION GO:0010638 M11547 206 0.25937999794228017 1.1227140873430972 0.212 0.8430684248039914 DLG1	CNOT6L	FERMT2	POC1B	CCL24	PGAM5	CNOT1	CLASP1	FLNA	SKA3	NEK7	SEMA5A	STIL	CNOT2	NUSAP1	CNOT6	CCT3	MMP9	PAN3	MET	NAV3	SDC4	ABL1	GSK3B	ANAPC7	LRP5	RICTOR	HTT	ANXA2	MAPKAPK5	SPIRE1	HNRNPA2B1	RTEL1	MTSS1	BAX	PTGES3	INO80D	DDX11	TERF2	MAD1L1	CTTN	PHIP	LPAR1	ARHGEF10L	AURKA Any process that increases the frequency	rate or extent of a process involved in the formation	arrangement of constituent parts	or disassembly of an organelle. [GOC:dph	GOC:tb] http://amigo.geneontology.org/amigo/term/GO:0010638 2025.1.Hs up
GOBP_POSITIVE_REGULATION_OF_CELLULAR_COMPONENT_BIOGENESIS GO:0044089 M12404 181 0.2609787542823288 1.1135384916586397 0.2135523613963039 0.8430684248039914 DLG1	CNOT6L	FERMT2	ACTR2	POC1B	CCL24	PLEKHM1	STAU2	CNOT1	DHX33	CLSTN3	CLASP1	FLNA	NEK7	STIL	CNOT2	CNOT6	SPIDR	PAN3	MET	NAV3	SDC4	ABL1	GSK3B	RICTOR	HTT	CUX2	MTSS1	BAX Any process that activates or increases the frequency	rate or extent of cellular component biogenesis	a process that results in the biosynthesis of constituent macromolecules	assembly	and arrangement of constituent parts of a cellular component. [GOC:jl] http://amigo.geneontology.org/amigo/term/GO:0044089 2025.1.Hs up
GOBP_GLUCAN_METABOLIC_PROCESS GO:0044042 M46802 23 -0.41972527308070023 -1.2104653437353519 0.21584158415841584 0.8442553630363037 PHKG1	PER2	WIPI1	LEPR	ATG3	EPM2A	UGP2	GRB10	PHKA2 The chemical reactions and pathways involving glucans	polysaccharides consisting only of glucose residues. [GOC:jl] http://amigo.geneontology.org/amigo/term/GO:0044042 2025.1.Hs down
GOBP_REGULATION_OF_SPINDLE_ASSEMBLY GO:0090169 M15257 17 -0.4629121466736551 -1.2444536010366811 0.21643286573146292 0.8451009471282253 GPSM2	CHMP4A	CHMP5	DYNC1H1	DRG1	PDCD6IP	CHMP3	PLK1	SENP6	TPR	CEP97 Any process that modulates the rate	frequency or extent of spindle assembly. Spindle assembly is the aggregation	arrangement and bonding together of a set of components to form the spindle	the array of microtubules and associated molecules that serves to move duplicated chromosomes apart. [GOC:ascb_2009	GOC:dph	GOC:tb] http://amigo.geneontology.org/amigo/term/GO:0090169 2025.1.Hs down
GOBP_NEGATIVE_REGULATION_OF_RESPONSE_TO_BIOTIC_STIMULUS GO:0002832 M12015 34 -0.38107926476880416 -1.1940569978065525 0.21756487025948104 0.8480513022398111 PCBP2	IRAK3	RPS19	YWHAZ	TGFB1	SAMHD1	GRB2	GRN	ADAR	ITCH Any process that stops	prevents	or reduces the frequency	rate	or extent of a response to biotic stimulus. [GOC:add] http://amigo.geneontology.org/amigo/term/GO:0002832 2025.1.Hs down
GOBP_MITOTIC_RECOMBINATION GO:0006312 M14528 17 -0.4619265646915638 -1.2418040463521827 0.218436873747495 0.8492391456093815 MLH1	TEP1	TERT	ERCC2	BRCA2	ERCC1 The exchange	reciprocal or nonreciprocal	of genetic material between one DNA molecule and a homologous DNA region that occurs during mitotic cell cycles. [GOC:elh] http://amigo.geneontology.org/amigo/term/GO:0006312 2025.1.Hs down
GOBP_RESPONSE_TO_FLUID_SHEAR_STRESS GO:0034405 M10752 24 0.41508470174403544 1.2036871869330208 0.21862348178137653 0.8492391456093815 PTK2	PLEC	ABL1	MTSS1	PTK2B	SREBF2	HAS2	PDPK1	SMAD7 Any process that results in a change in state or activity of a cell or an organism (in terms of movement	secretion	enzyme production	gene expression	etc.) as a result of a fluid shear stress stimulus. Fluid shear stress is the force acting on an object in a system where the fluid is moving across a solid surface. [GOC:sl] http://amigo.geneontology.org/amigo/term/GO:0034405 2025.1.Hs up
GOBP_ANTIGEN_RECEPTOR_MEDIATED_SIGNALING_PATHWAY GO:0050851 M11047 70 -0.31857154282301026 -1.161318673738212 0.2199248120300752 0.850188679245283 TNFRSF21	THEMIS2	PRNP	CD276	LPXN	RPS3	WNK1	NFKB1	CRKL	SPPL3	BRAF	EIF2B3	GRB2	ELF1	SPG21	PSEN1	CMTM3	CD226	IKBKB	NFAM1	NFATC2	PRKCB	ADA	EIF2B5	LCK	LIPA	PLCG2	MEF2C The series of molecular signals initiated by the cross-linking of an antigen receptor on a B or T cell. [GOC:add] http://amigo.geneontology.org/amigo/term/GO:0050851 2025.1.Hs down
GOBP_REGULATION_OF_CALCIUM_ION_TRANSPORT GO:0051924 M42858 76 0.3085965417848395 1.144720421592116 0.21991701244813278 0.850188679245283 ASPH	CEMIP	UBQLN1	TMX1	P2RX1	LPAR3	FKBP1A	PPP3CA	UCP2	PDE4D	PDE4B	ABL1	VMP1	JPH1	AHNAK	HTT	BAX	HOMER2	TRPC1	CHD7	STIM1	EPB41	PTK2B	STAC	PDPK1	SLC8A1	PSEN2 Any process that modulates the frequency	rate or extent of the directed movement of calcium ions into	out of or within a cell	or between cells	by means of some agent such as a transporter or pore. [GOC:ai] http://amigo.geneontology.org/amigo/term/GO:0051924 2025.1.Hs up
GOBP_POSITIVE_REGULATION_OF_MOLECULAR_FUNCTION GO:0044093 M12495 206 0.2578714132710707 1.1161842497467007 0.22 0.850188679245283 ACTN4	PTK2	ASPH	BCAR3	CORO1C	ARHGAP11B	SCRIB	CEMIP	MAP3K10	DHX33	PHACTR4	RAN	MMP9	MET	CCNY	MID2	PRKCZ	SNX13	FGFR1	ABL1	SKI	VMP1	ARHGEF2	GSK3B	TRIM25	ABR	RHOG	PRKCI	HTT	MTPN	CACUL1	RASSF2	SKP1	PIP5K1A	GPSM1	DDX11 Any process that activates or increases the rate or extent of a molecular function	an elemental biological activity occurring at the molecular level	such as catalysis or binding. [GO:jl] http://amigo.geneontology.org/amigo/term/GO:0044093 2025.1.Hs up
GOBP_RESPIRATORY_SYSTEM_PROCESS GO:0003016 M11273 16 -0.46815139774570924 -1.23060044384506 0.22444889779559118 0.8502393389874273 VANGL1	FTO	YWHAZ	HIPK2	COL6A1	AP3B1	MTG1 A process carried out by the organs or tissues of the respiratory system. The respiratory system is an organ system responsible for respiratory gaseous exchange. [GOC:dph	GOC:mtg_cardio	GOC:tb] http://amigo.geneontology.org/amigo/term/GO:0003016 2025.1.Hs down
GOBP_POSITIVE_REGULATION_OF_INTERLEUKIN_6_PRODUCTION GO:0032755 M16211 19 -0.44377508611056615 -1.2220010474199188 0.22266401590457258 0.8502393389874273 APP	TGFB1	TLR1	STAT3	LILRA5	PLCG2	HSPD1	SYK	LAPTM5	SCIMP	CD74	RIPK2 Any process that activates or increases the frequency	rate	or extent of interleukin-6 production. [GOC:mah] http://amigo.geneontology.org/amigo/term/GO:0032755 2025.1.Hs down
GOBP_POSITIVE_REGULATION_OF_DOUBLE_STRAND_BREAK_REPAIR_VIA_HOMOLOGOUS_RECOMBINATION GO:1905168 M25326 17 0.448695130606506 1.2067386831970932 0.220675944333996 0.8502393389874273 CREBBP	ACTR2	ERCC6	HELQ Any process that activates or increases the frequency	rate or extent of double-strand break repair via homologous recombination. [GO_REF:0000058	GOC:TermGenie	PMID:12023299] http://amigo.geneontology.org/amigo/term/GO:1905168 2025.1.Hs up
GOBP_REGULATION_OF_TISSUE_REMODELING GO:0034103 M16194 21 -0.4307412515785847 -1.202701985872454 0.22267206477732793 0.8502393389874273 CST3	BCR	SUCO	LTBP3	LEPR	GPR137B	TGFB1	PRKCA	RUNX1	DDR2	NF1 Any process that modulates the frequency	rate	or extent of tissue remodeling. [GOC:add] http://amigo.geneontology.org/amigo/term/GO:0034103 2025.1.Hs down
GOBP_NEGATIVE_REGULATION_OF_OSTEOBLAST_DIFFERENTIATION GO:0045668 M15707 20 0.42680213742619694 1.2014136950894556 0.22529644268774704 0.8502393389874273 CRIM1	SKI	GSK3B	LRP5 Any process that stops	prevents	or reduces the frequency	rate or extent of osteoblast differentiation. [GOC:go_curators] http://amigo.geneontology.org/amigo/term/GO:0045668 2025.1.Hs up
GOBP_MRNA_EXPORT_FROM_NUCLEUS GO:0006406 M22412 38 0.36496780923043415 1.1754807826027753 0.2222222222222222 0.8502393389874273 NUP214	NEAT1	XPO1	SETD2	SMG1	HNRNPA2B1	NUP107	AKAP8L	UPF2	GLE1 The directed movement of mRNA from the nucleus to the cytoplasm. [GOC:ma] http://amigo.geneontology.org/amigo/term/GO:0006406 2025.1.Hs up
GOBP_NEPHRON_EPITHELIUM_DEVELOPMENT GO:0072009 M12799 35 0.37021101702419085 1.1747763939117972 0.22474226804123712 0.8502393389874273 DLG1	ASXL1	HS3ST3A1	PODXL	AHI1	KLHL3	MTSS1	GREB1L	LAMA5 The process whose specific outcome is the progression of the nephron epithelium over time	from its formation to the mature structure. An epithelium is a tissue that covers the internal or external surfaces of an anatomical structure. The nephron epithelium is a tissue that covers the surface of a nephron. [GOC:mtg_kidney_jan10] http://amigo.geneontology.org/amigo/term/GO:0072009 2025.1.Hs up
GOBP_HOMOTYPIC_CELL_CELL_ADHESION GO:0034109 M14858 40 -0.3592936534474302 -1.1722691302282735 0.22396856581532418 0.8502393389874273 MYL9	ACTB	HSPB1	TLN1	PPIA	JAK1	STXBP1	VCL	PRKCA	JUP	PTPRU	ACTG1	PIK3CG	PLEK	METAP1	VPS33B	PLAUR	PDGFRA	PRKG1	CSRP1	SYK The attachment of a cell to a second cell of the identical type via adhesion molecules. [GOC:add] http://amigo.geneontology.org/amigo/term/GO:0034109 2025.1.Hs down
GOBP_GOLGI_ORGANIZATION GO:0007030 M16920 71 -0.31807622042529027 -1.1618567236955797 0.222011385199241 0.8502393389874273 PDE4DIP	ARL1	STX5	RAB2A	HUWE1	NPLOC4	TMED4	USO1	YWHAZ	DYNC2H1	MAP2K2	VTI1B	PLEKHM2	STX18	GBF1	NSFL1C	GOLPH3L	SEC23IP	DYM	GOLPH3	MYO5A	COG6	COG5	PLK1	LRRK2	TJAP1 A process that is carried out at the cellular level which results in the assembly	arrangement of constituent parts	or disassembly of the Golgi apparatus. [GOC:dph	GOC:jl	GOC:mah] http://amigo.geneontology.org/amigo/term/GO:0007030 2025.1.Hs down
GOBP_NEURON_PROJECTION_EXTENSION GO:1990138 M10515 61 -0.3272161665103935 -1.1554181244077153 0.225 0.8502393389874273 FN1	PPP3CB	DDR1	CPNE1	VCL	SLIT3	BMPR2	CYFIP1	NEDD4L	ULK2	LIMK1	PTPRS	SPAG9	NDEL1	ZFYVE27	RTN4	SIN3A	SLC23A2	DNM2	TRPV2	USP9X	PLXNA1	RIMS2	EIF2AK4 Long distance growth of a single neuron projection involved in cellular development. A neuron projection is a prolongation or process extending from a nerve cell	e.g. an axon or dendrite. [GOC:BHF	GOC:rl	PMID:22790009] http://amigo.geneontology.org/amigo/term/GO:1990138 2025.1.Hs down
GOBP_CELL_FATE_COMMITMENT GO:0045165 M15945 78 -0.31031216623539737 -1.1526690780392654 0.22413793103448276 0.8502393389874273 EXT1	SLAMF6	RBPJ	JAK1	TGFB1I1	NOTCH3	RUNX2	MTA1	SMAD1	SUFU	BRAF	TGFBR1	MGA	STAT3	EP300	RHOA	CHD3	EPAS1	PSEN1	GATAD2B	BRD4	NFIA	EYA1 The cellular developmental process by which a cell establishes the intrinsic character of a cell or tissue region irreversibly committing it to a particular fate. [ISBN:0716731185] http://amigo.geneontology.org/amigo/term/GO:0045165 2025.1.Hs down
GOBP_ERK1_AND_ERK2_CASCADE GO:0070371 M16677 85 -0.30129467681165 -1.1348408190517936 0.22286821705426357 0.8502393389874273 FN1	FBXW7	CD44	PTPN11	PHB2	APP	GSTP1	YWHAZ	MAP2K2	CRKL	TGFB1	PRKCA	GNAI2	BRAF	FAM83D	INPPL1	ICAM1	RANBP9	DDR2	NF1	EIF3A	PDE8A	SPRED2	GRB10 A MAPK cascade containing at least the ERK1 or ERK2 MAP kinases. It starts with the activation of a MAP3K	and the consecutive activation of a MPK2K and of ERK1 or ERK2. The cascade can also contain an additional tier: the upstream MAP4K. The kinases in each tier phosphorylate and activate the kinase in the downstream tier. The ERK1/ERK2 cascade is activated by mitogens	growth factors	G protein-coupled receptors	and results in cellular responses such as cell proliferation	cell differentiation and development. [PMID:20811974	PMID:23125017	PMID:28903453] http://amigo.geneontology.org/amigo/term/GO:0070371 2025.1.Hs down
GOBP_AMEBOIDAL_TYPE_CELL_MIGRATION GO:0001667 M11839 96 -0.2939900586263752 -1.1337596789115034 0.22286821705426357 0.8502393389874273 FN1	TIMP1	SEMA4G	NCKAP1	HIF1A	THBS1	ITGB4	PTPN11	SEMA3C	MCC	CAP1	ADAM9	OVOL2 Cell migration that is accomplished by extension and retraction of a pseudopodium. [GOC:dph] http://amigo.geneontology.org/amigo/term/GO:0001667 2025.1.Hs down
GOBP_HEAD_DEVELOPMENT GO:0060322 M14257 293 0.24356482731269194 1.0925744851453594 0.22474226804123712 0.8502393389874273 ASPH	CORO1C	ARHGAP11B	SCRIB	HSPG2	HERC1	B2M	ANKRD11	UBE3A	FXR1	GABRB3	ZNF148	FLNA	SOX6	TRA2B	SEMA5A	STIL	TIPARP	AKT3	AXIN1	PRKDC	AHI1	LRP8	RAN	RERE	TACC3	FBXW11	DOCK7	SLIT2	CCDC134	FGFR1	ABL1	SKI	SDF4	GSK3B	CTNNA2	ANAPC7	DCLK2	ARNT2	ROBO1	KDM1A	KDM4B	AXL	SUN1	GRIN2D	FOXP1	RYK	BAX	VPS13B	NDST1
GOBP_RESPONSE_TO_NITROGEN_COMPOUND GO:1901698 M10215 370 -0.2345209799472574 -1.0809723127625899 0.22586872586872586 0.8509736444519053 TIMP1	ATP2B1	RPS6	CREB1	SNX5	VIM	ACTB	HSP90AA1	SSH1	EXT1	HDAC5	PKD2	IRAK3	HTR7	PTPN11	JAK1	TCF12	FBN1	RGS10	PRNP	CHMP5	GPX1	FKBP5	NPLOC4	ABCC1	RAB31	LGMN	TGM2	NUDC	APP	SYAP1	NCOA2	RANGAP1	USO1	GSTP1	GNB1	AP3S1	STAT5B	ITPR1	RAPGEF1	POR	EEF2	NFKB1	EDEM2	LPIN2	DIAPH1	CPT1A	EIF4EBP2	ATF6	VCP
GOBP_REGULATION_OF_ANIMAL_ORGAN_MORPHOGENESIS GO:2000027 M25426 15 -0.4794985932047079 -1.245165405009249 0.22817460317460317 0.8526081559746905 ROBO2	PHB2	RUNX2	ETV5	TGFB1	NTN4 Any process that modulates the frequency	rate or extent of animal organ morphogenesis. [GOC:obol] http://amigo.geneontology.org/amigo/term/GO:2000027 2025.1.Hs down
GOBP_NEGATIVE_REGULATION_OF_TRANSLATIONAL_INITIATION GO:0045947 M11930 15 -0.47294071160650947 -1.2281358507791758 0.23015873015873015 0.8526081559746905 RPL13A	EIF3E	EIF2AK1	EIF2AK3	EIF4EBP2 Any process that stops	prevents	or reduces the frequency	rate or extent of translational initiation. [GOC:go_curators] http://amigo.geneontology.org/amigo/term/GO:0045947 2025.1.Hs down
GOBP_REGULATION_OF_LIPID_STORAGE GO:0010883 M10255 16 -0.46338815348838913 -1.2180796001064185 0.23046092184368738 0.8526081559746905 FBXW7	FTO	NFKB1	CPT1A	SCARB1	PPARA Any process that modulates the rate	frequency or extent of lipid storage. Lipid storage is the accumulation and maintenance in cells or tissues of lipids	compounds soluble in organic solvents but insoluble or sparingly soluble in aqueous solvents. Lipid reserves can be accumulated during early developmental stages for mobilization and utilization at later stages of development. [GOC:BHF	GOC:dph	GOC:tb] http://amigo.geneontology.org/amigo/term/GO:0010883 2025.1.Hs down
GOBP_OUTFLOW_TRACT_MORPHOGENESIS GO:0003151 M15408 29 -0.39968819396193234 -1.2045990286368449 0.2350597609561753 0.8526081559746905 HIF1A	RBPJ	ROBO2	SEMA3C	DHRS3	BMPR2	CRKL The process in which the anatomical structures of the outflow tract are generated and organized. The outflow tract is the portion of the heart through which blood flows into the arteries. [GOC:mtg_heart	UBERON:0004145] http://amigo.geneontology.org/amigo/term/GO:0003151 2025.1.Hs down
GOBP_POLYSACCHARIDE_BIOSYNTHETIC_PROCESS GO:0000271 M10417 17 -0.44788920554173 -1.2040672052073098 0.24448897795591182 0.8526081559746905 PER2	EXT1	NFKB1	TGFB1	EPM2A	UGP2	GRB10 The chemical reactions and pathways resulting in the formation of a polysaccharide	a polymer of many (typically more than 10) monosaccharide residues linked glycosidically. [GOC:go_curators] http://amigo.geneontology.org/amigo/term/GO:0000271 2025.1.Hs down
GOBP_POSITIVE_REGULATION_OF_STEM_CELL_PROLIFERATION GO:2000648 M15864 19 0.43187377390573833 1.19943704769264 0.24048096192384769 0.8526081559746905 FERMT2	PRRX1	N4BP2L2	FGFR1	KDM1A Any process that activates or increases the frequency	rate or extent of stem cell proliferation. [GOC:dph] http://amigo.geneontology.org/amigo/term/GO:2000648 2025.1.Hs up
GOBP_REGULATION_OF_NEURON_PROJECTION_REGENERATION GO:0070570 M14165 16 0.44908865702947554 1.1966691503781497 0.2345924453280318 0.8526081559746905 PTPRF	PRRX1 Any process that modulates the rate	frequency or extent of neuron projection regeneration	the regrowth of neuronal processes such as axons or dendrites following their loss or damage. [GOC:mah] http://amigo.geneontology.org/amigo/term/GO:0070570 2025.1.Hs up
GOBP_REGULATION_OF_CALCINEURIN_MEDIATED_SIGNALING GO:0106056 M24892 19 -0.434011863234412 -1.1951165535529467 0.23856858846918488 0.8526081559746905 PPP3CB	CHP1	PRNP	FHL2	SPPL3	CAMTA1	ATP2B4 Any process that modulates the frequency	rate or extent of calcineurin-mediated signaling. [PMID:25081204] http://amigo.geneontology.org/amigo/term/GO:0106056 2025.1.Hs down
GOBP_REGULATION_OF_PHAGOCYTOSIS GO:0050764 M15210 24 -0.4066701592995576 -1.1920788377787643 0.25 0.8526081559746905 CNN2	BCR	RAB31	TGM2	TGFB1	SCARB1	ATG3	STAT3	ANO6	DOCK2	PLCG2	SYK	RAP1A	ITGAV Any process that modulates the frequency	rate or extent of phagocytosis	the process in which phagocytes engulf external particulate material. [GOC:ai] http://amigo.geneontology.org/amigo/term/GO:0050764 2025.1.Hs down
GOBP_RNA_POLYMERASE_II_PREINITIATION_COMPLEX_ASSEMBLY GO:0051123 M23951 20 -0.43145882642141165 -1.1912725382100942 0.24596774193548387 0.8526081559746905 CREB1	TAF4B	TAF12	PSMC6 The formation of a large multiprotein-DNA complex that self-assembles on gene promoter through the sequential recruitment of the general initiation factors that compose the preinitiation complex (PIC) (which may include TFIIA	TFIIB	TFIID	TFIIE	TFIIF	and TFIIH complexes). The PIC engages RNA polymerase II on its DNA template strand and sparks polymerization of the first few RNA nucleotides of the nascent transcript	of which 8 are base-paired with the DNA template within a DNA bubble. PIC assembly may result in a pause step	which marks the end of the PIC assembly and may be followed by promoter clearance (exact synonym: promoter escape). For RNA polymerase II PIC assembly is preceded by the formation of a nucleosome-free region that allows the transcription machinery to access the promoter DNA. [GOC:txnOH	PMID:15020047	PMID:31300188] http://amigo.geneontology.org/amigo/term/GO:0051123 2025.1.Hs down
GOBP_RETROGRADE_VESICLE_MEDIATED_TRANSPORT_GOLGI_TO_ENDOPLASMIC_RETICULUM GO:0006890 M22482 29 -0.3952440123099824 -1.191204945494288 0.24701195219123506 0.8526081559746905 UVRAG	COPZ2	STX5	ARCN1	ERGIC2	COPA	COPB2	STX18	GBF1	GOLPH3L	GOLPH3	ARF4	ERGIC1	COPZ1 The directed movement of substances from the Golgi back to the endoplasmic reticulum	mediated by vesicles bearing specific protein coats such as COPI or COG. [ISBN:0716731363	PMID:16510524] http://amigo.geneontology.org/amigo/term/GO:0006890 2025.1.Hs down
GOBP_EMBRYONIC_HEART_TUBE_DEVELOPMENT GO:0035050 M12452 29 -0.3946236770910106 -1.189335350110958 0.250996015936255 0.8526081559746905 NCKAP1	HIF1A	ECE1	PKD2	YAP1	OVOL2	SUFU	IFT172	IFT122	C2CD3	PSEN1	CCDC40 The process whose specific outcome is the progression of the embryonic heart tube over time	from its formation to the mature structure. The heart tube forms as the heart rudiment from the heart field. [GOC:go_curators] http://amigo.geneontology.org/amigo/term/GO:0035050 2025.1.Hs down
GOBP_VESICLE_DOCKING_INVOLVED_IN_EXOCYTOSIS GO:0006904 M12489 22 -0.4230312764148471 -1.1861860321855926 0.22950819672131148 0.8526081559746905 STX1A	EXOC7	STXBP1	VPS11	VTI1B	UNC13B The initial attachment of a vesicle membrane to a target membrane	mediated by proteins protruding from the membrane of the vesicle and the target membrane	that contributes to exocytosis. [GOC:aruk	GOC:bc	GOC:jid	PMID:22438915] http://amigo.geneontology.org/amigo/term/GO:0006904 2025.1.Hs down
GOBP_INTERMEDIATE_FILAMENT_ORGANIZATION GO:0045109 M10607 17 0.4405887171016942 1.184936969536807 0.23856858846918488 0.8526081559746905 KRT19	PLEC	KRT5	KRT7 Control of the spatial distribution of intermediate filaments; includes organizing filaments into meshworks	bundles	or other structures	as by cross-linking. [GOC:ai] http://amigo.geneontology.org/amigo/term/GO:0045109 2025.1.Hs up
GOBP_NEGATIVE_REGULATION_OF_HIPPO_SIGNALING GO:0035331 M23323 15 0.4539018901597397 1.184705712093679 0.2429718875502008 0.8526081559746905 WWC3	WTIP	PPP2R1A	VGLL4	SLMAP Any process that stops	prevents	or reduces the frequency	rate or extent of hippo signaling. [GOC:bf] http://amigo.geneontology.org/amigo/term/GO:0035331 2025.1.Hs up
GOBP_SYNAPTIC_VESICLE_LOCALIZATION GO:0097479 M10129 27 -0.39645344188750076 -1.1846402315506088 0.2440944881889764 0.8526081559746905 MX1	KIF5B	AP3S1	AP3D1	PINK1	AP3B1	SYNDIG1	KIF1B	DNM2	LRRK2	SYN3 Any process in which a synaptic vesicle or vesicles are transported to	and/or maintained in	a specific location. [GOC:pr] http://amigo.geneontology.org/amigo/term/GO:0097479 2025.1.Hs down
GOBP_CELLULAR_RESPONSE_TO_HEAT GO:0034605 M13924 27 -0.395549275012326 -1.181938495752156 0.2440944881889764 0.8526081559746905 HSP90AA1	THBS1	MAPKAPK2	ATM	YWHAE	HSP90AB1	DNAJC7	VCP Any process that results in a change in state or activity of a cell (in terms of movement	secretion	enzyme production	gene expression	etc.) as a result of a heat stimulus	a temperature stimulus above the optimal temperature for that organism. [GOC:mah] http://amigo.geneontology.org/amigo/term/GO:0034605 2025.1.Hs down
GOBP_GLIAL_CELL_MIGRATION GO:0008347 M14116 20 0.41974088124407727 1.181536826775504 0.25296442687747034 0.8526081559746905 SCRIB	VCAN	LRP8	RRAS2	SUN1	ZMIZ1	SOCS7 The orderly movement of a glial cell	non-neuronal cells that provide support and nutrition	maintain homeostasis	form myelin	and participate in signal transmission in the nervous system. [GOC:jl	GOC:mtg_sensu] http://amigo.geneontology.org/amigo/term/GO:0008347 2025.1.Hs up
GOBP_REGULATION_OF_ERYTHROCYTE_DIFFERENTIATION GO:0045646 M13902 23 0.40791269476236713 1.1812815369988672 0.23541247484909456 0.8526081559746905 ETS1	B2M	INPP5D	PRKDC	ACVR2A	KLF13	FOXO3	BRD1	MED1	HSPA9 Any process that modulates the frequency	rate or extent of erythrocyte differentiation. [GOC:go_curators] http://amigo.geneontology.org/amigo/term/GO:0045646 2025.1.Hs up
GOBP_NEGATIVE_REGULATION_OF_CANONICAL_NF_KAPPAB_SIGNAL_TRANSDUCTION GO:0043124 M14214 27 -0.3952812131201722 -1.181137501566107 0.2440944881889764 0.8526081559746905 IRAK3	ZMYND11	TLE1	GSTP1	SPI1	STAT3	FAF1	SLC39A8	ITCH	TANK Any process that stops	prevents	or reduces the frequency	rate or extent of a canonical NF-kappaB signaling cascade. [GOC:jl] http://amigo.geneontology.org/amigo/term/GO:0043124 2025.1.Hs down
GOBP_POSITIVE_REGULATION_OF_MIRNA_METABOLIC_PROCESS GO:2000630 M29396 27 0.3950559795456261 1.1793077629718005 0.25101214574898784 0.8526081559746905 MALAT1	ETS1	NEAT1 Any process that activates or increases the frequency	rate or extent of miRNA metabolic process. [GOC:dph] http://amigo.geneontology.org/amigo/term/GO:2000630 2025.1.Hs up
GOBP_RELEASE_OF_SEQUESTERED_CALCIUM_ION_INTO_CYTOSOL_BY_ENDOPLASMIC_RETICULUM GO:1903514 M25173 15 0.4513919209304581 1.1781545719738113 0.24899598393574296 0.8526081559746905 ASPH	FKBP1A	PDE4D	JPH1	CHD7 The directed movement of calcium ion from endoplasmic reticulum to cytosol. [GO_REF:0000078	GOC:BHF	GOC:mtg_cardiac_conduct_nov11	GOC:rl	GOC:TermGenie	PMID:16402920] http://amigo.geneontology.org/amigo/term/GO:1903514 2025.1.Hs up
GOBP_LENS_DEVELOPMENT_IN_CAMERA_TYPE_EYE GO:0002088 M16757 27 0.39462686382537343 1.1780267812215959 0.25303643724696356 0.8526081559746905 DLG1	NHS	BCAR3 The process whose specific outcome is the progression of the lens over time	from its formation to the mature structure. The lens is a transparent structure in the eye through which light is focused onto the retina. An example of this process is found in Mus musculus. [GOC:dph	ISBN:0582064333] http://amigo.geneontology.org/amigo/term/GO:0002088 2025.1.Hs up
GOBP_POSITIVE_REGULATION_OF_SMALL_GTPASE_MEDIATED_SIGNAL_TRANSDUCTION GO:0051057 M15980 30 0.3828212203013205 1.1766476226777556 0.24151696606786427 0.8526081559746905 FERMT2	TNS3	FXR1	PICALM Any process that activates or increases the frequency	rate or extent of small GTPase mediated signal transduction. [GOC:ai] http://amigo.geneontology.org/amigo/term/GO:0051057 2025.1.Hs up
GOBP_REGULATION_OF_PROTEIN_TARGETING GO:1903533 M16731 32 -0.38011042089358626 -1.1756697003857564 0.24898785425101214 0.8526081559746905 FBXW7	ABLIM3	CHP1	BNIP3L	PRNP	HUWE1	VPS11	HPS4	NPEPPS	UBE2J2 Any process that modulates the frequency	rate or extent of protein targeting. [GO_REF:0000058	GOC:TermGenie] http://amigo.geneontology.org/amigo/term/GO:1903533 2025.1.Hs down
GOBP_RESPONSE_TO_NERVE_GROWTH_FACTOR GO:1990089 M11962 26 -0.3936708139800964 -1.17388854933457 0.2446601941747573 0.8526081559746905 CREB1	EIF4A3	APP	RAPGEF1	EEF2	CBL	CSNK1E	EEF2K	E2F1	KAT2A	SORT1	ACAP2	RAP1A	USP8 A process that results in a change in state or activity of a cell or an organism (in terms of movement	secretion	enzyme production	gene expression	etc.) as a result of a nerve growth factor stimulus. [PMID:22399805] http://amigo.geneontology.org/amigo/term/GO:1990089 2025.1.Hs down
GOBP_NUCLEOSIDE_TRIPHOSPHATE_BIOSYNTHETIC_PROCESS GO:0009142 M13233 34 -0.3730222457232909 -1.1688114889001773 0.25149700598802394 0.8526081559746905 ADK	NDUFB2	ENO1	ALDOA	VCP	SLC25A13	TGFB1	NDUFS3	PPARA	CAD	STAT3	NDUFA12	PINK1	NDUFS8 The chemical reactions and pathways resulting in the formation of a nucleoside triphosphate	a compound consisting of a nucleobase linked to a deoxyribose or ribose sugar esterified with triphosphate on the sugar. [GOC:go_curators	ISBN:0198506732] http://amigo.geneontology.org/amigo/term/GO:0009142 2025.1.Hs down
GOBP_CARDIAC_MUSCLE_CELL_CONTRACTION GO:0086003 M13694 25 0.39766376339366877 1.1686353553054536 0.25250501002004005 0.8526081559746905 DLG1	FLNA	PDE4D	PDE4B The actin filament-based process in which cytoplasmic actin filaments slide past one another resulting in contraction of a cardiac muscle cell. [GOC:BHF	GOC:mtg_cardiac_conduct_nov11] http://amigo.geneontology.org/amigo/term/GO:0086003 2025.1.Hs up
GOBP_REGULATION_OF_SIGNAL_TRANSDUCTION_BY_P53_CLASS_MEDIATOR GO:1901796 M14674 47 -0.34744782010339353 -1.1677424095663231 0.23031496062992127 0.8526081559746905 CD44	RPL5	RPL11	USP7	ATM	KDM8	HIPK2	TP53BP1	EEF1E1 Any process that modulates the frequency	rate or extent of signal transduction by p53 class mediator. [GOC:TermGenie] http://amigo.geneontology.org/amigo/term/GO:1901796 2025.1.Hs down
GOBP_REGULATION_OF_NUCLEOTIDE_METABOLIC_PROCESS GO:0006140 M15679 34 -0.3726002450822166 -1.1674892106627106 0.25349301397205587 0.8526081559746905 DDIT4	HIF1A	ME2	APP	ENO1	VCP	ME1	PPARA	STAT3	EP300	PSEN1 Any process that modulates the frequency	rate or extent of the chemical reactions and pathways involving nucleotides. [GOC:go_curators] http://amigo.geneontology.org/amigo/term/GO:0006140 2025.1.Hs down
GOBP_NEGATIVE_REGULATION_OF_SECRETION GO:0051048 M1310 47 -0.34668293637719033 -1.1651717007755504 0.23031496062992127 0.8526081559746905 PTPN11	RAB11FIP3	BCR	WNK1	FRMD4A	GNAI2	BRAF	SPI1	RAB7A	RAB11FIP1	NF1	GNAI1	ADA	STXBP6	PFKL	PRKG1	RAP1A	KLF7	GGCX	STK39	PSMD9	CD74 Any process that stops	prevents	or reduces the frequency	rate or extent of the controlled release of a substance from a cell or a tissue. [GOC:ai] http://amigo.geneontology.org/amigo/term/GO:0051048 2025.1.Hs down
GOBP_REGULATION_OF_MONONUCLEAR_CELL_MIGRATION GO:0071675 M12011 38 -0.35787574268814365 -1.1641252958070882 0.24 0.8526081559746905 CNN2	THBS1	CD99L2	BCR	P4HB	LGMN	APP	IL27RA	WNK1	CRKL	TGFB1	SPI1 Any process that modulates the rate	frequency or extent of mononuclear cell migration. Mononuclear cell migration is the movement of a mononuclear cell within or between different tissues and organs of the body. [GOC:mah] http://amigo.geneontology.org/amigo/term/GO:0071675 2025.1.Hs down
GOBP_CELL_ADHESION_MEDIATED_BY_INTEGRIN GO:0033627 M15495 36 -0.36294038907817716 -1.1623019818510785 0.24423076923076922 0.8526081559746905 ITGB4	EXT1	PTPN11	FBN1	ITGB5	ADAM9	LPXN	WNK1	ITGA5	CRKL The attachment of a cell	either to another cell or to an underlying substrate such as the extracellular matrix	via an integrin	a heterodimeric adhesion receptor formed by the non-covalent association of particular alpha and beta subunits. [GOC:add	PMID:12213832	PMID:14754902] http://amigo.geneontology.org/amigo/term/GO:0033627 2025.1.Hs down
GOBP_ALPHA_BETA_T_CELL_ACTIVATION GO:0046631 M14300 52 -0.33977822899775506 -1.162156947700469 0.23874755381604695 0.8526081559746905 SLAMF6	JAK1	ZBTB16	BRAF	TYK2	ELF4	RUNX1	STAT3	EP300	RHOA	AP3D1	PIK3R1	ITCH	BRD4	AP3B1	TWSG1	ADA	GLI3	DOCK2 The change in morphology and behavior of an alpha-beta T cell resulting from exposure to a mitogen	cytokine	chemokine	cellular ligand	or an antigen for which it is specific. [GOC:add] http://amigo.geneontology.org/amigo/term/GO:0046631 2025.1.Hs down
GOBP_CELLULAR_RESPONSE_TO_BIOTIC_STIMULUS GO:0071216 M10812 68 -0.3206779919169056 -1.1615337400997308 0.23193916349809887 0.8526081559746905 VIM	HDAC5	IRAK3	PTPN11	BCR	CHMP5	ADAM9	GSTP1	EIF2AK3	NFKB1	PRKCA	TLR1	SPI1	SCARB1	RHOA	HADHB	CDK19 Any process that results in a change in state or activity of a cell (in terms of movement	secretion	enzyme production	gene expression	etc.) as a result of a biotic stimulus	a stimulus caused or produced by a living organism. [GOC:mah] http://amigo.geneontology.org/amigo/term/GO:0071216 2025.1.Hs down
GOBP_REGULATION_OF_POSTSYNAPTIC_MEMBRANE_POTENTIAL GO:0060078 M12831 37 0.3617729861872153 1.1593426720186009 0.23173277661795408 0.8526081559746905 GABRB3	PRKAR1B	TRPV1	P2RX1	MET	PPP3CA	PRKCZ	GSK3B	GRIN2D	CUX2 Any process that modulates the potential difference across a post-synaptic membrane. [GOC:dph	GOC:ef] http://amigo.geneontology.org/amigo/term/GO:0060078 2025.1.Hs up
GOBP_MEMBRANE_DOCKING GO:0022406 M11875 46 -0.3463536563843909 -1.1576606741166267 0.233201581027668 0.8526081559746905 STX1A	VAPB	CHP1	EXOC7	STX5	STXBP1	PACS2	USO1	VPS11	VAPA	VTI1B	UNC13B	RAB7A	ICAM1	ATP2A2	CEP83	PLEK	ESYT1 The initial attachment of a membrane or protein to a target membrane. Docking requires only that the proteins come close enough to interact and adhere. [GOC:isa_complete	PMID:27875684] http://amigo.geneontology.org/amigo/term/GO:0022406 2025.1.Hs down
GOBP_SPECIFICATION_OF_SYMMETRY GO:0009799 M12038 41 -0.3496671547710245 -1.1505320485617636 0.25048923679060664 0.8526081559746905 HIF1A	NOMO1	PKD2	NOMO3	BICC1	OVOL2	DYNC2H1	SUFU	AP1B1	IFT172	RFX3	C2CD3	PSEN1	DISP1	CCDC40 The establishment of an organism's body plan or part of an organism such that a similar arrangement in form and relationship of parts around a common axis	or around each side of a plane is created. [GOC:go_curators] http://amigo.geneontology.org/amigo/term/GO:0009799 2025.1.Hs down
GOBP_PRODUCTION_OF_MOLECULAR_MEDIATOR_OF_IMMUNE_RESPONSE GO:0002440 M16237 71 -0.3144202377287354 -1.1485022891137442 0.22960151802656548 0.8526081559746905 GALNT2	MLH1	HK1	IRAK3	PHB2	MAPKAPK2	GPI	YY1	TFRC	IL27RA	HMCES	TP53BP1	TGFB1	SAMHD1 The synthesis or release of any molecular mediator of the immune response	resulting in an increase in its intracellular or extracellular levels. [GO_REF:0000022	GOC:add	ISBN:0781735149] http://amigo.geneontology.org/amigo/term/GO:0002440 2025.1.Hs down
GOBP_GLIAL_CELL_DEVELOPMENT GO:0021782 M11130 47 -0.34099041582002243 -1.1460396260083092 0.25196850393700787 0.8526081559746905 DICER1	VIM	ITGB4	APP	GSTP1	ERCC2	MAP2K2	TGFB1	EIF2B3	GRB2	COL6A1	GRN	PSEN1	NF1 The process aimed at the progression of a glial cell over time	from initial commitment of the cell to a specific fate	to the fully functional differentiated cell. [GO_REF:0000021	GOC:cls	GOC:dgh	GOC:dph	GOC:jid] http://amigo.geneontology.org/amigo/term/GO:0021782 2025.1.Hs down
GOBP_REGULATION_OF_TRANSLATIONAL_INITIATION GO:0006446 M17238 48 -0.3398712871716085 -1.1460071449332587 0.2446183953033268 0.8526081559746905 RPL13A	EIF3E	HSPB1	EIF4B	METAP2	EIF2AK1	EIF2AK3	CTIF	EIF4EBP2	EIF3H	EIF4G3	EIF1	BZW2 Any process that modulates the frequency	rate or extent of translational initiation. [GOC:go_curators] http://amigo.geneontology.org/amigo/term/GO:0006446 2025.1.Hs down
GOBP_REGULATION_OF_LEUKOCYTE_MIGRATION GO:0002685 M11696 57 -0.32826207441998745 -1.1432650782929512 0.24951267056530213 0.8526081559746905 CNN2	THBS1	CD99L2	BCR	P4HB	LGMN	APP	IL27RA	PTN	WNK1	VEGFC	CRKL	TGFB1	SPI1	MPP1	ICAM1	RHOA	PIK3R1	ANO6	NF1	RTN4	RAC1 Any process that modulates the frequency	rate	or extent of leukocyte migration. [GOC:add] http://amigo.geneontology.org/amigo/term/GO:0002685 2025.1.Hs down
GOBP_REGULATION_OF_BINDING GO:0051098 M4198 57 0.3234264627680433 1.1418747365211421 0.24539877300613497 0.8526081559746905 PTPRF	RAN	MMP9	MET	JUN	ABL1	SKI	SYMPK	GSK3B	BAX	GPSM1	DDX11	DOT1L	AURKA	TFAP4	GAS8	EPB41	RNF220 Any process that modulates the frequency	rate or extent of binding	the selective interaction of a molecule with one or more specific sites on another molecule. [GOC:ai] http://amigo.geneontology.org/amigo/term/GO:0051098 2025.1.Hs up
GOBP_POSITIVE_REGULATION_OF_CYTOSKELETON_ORGANIZATION GO:0051495 M8358 73 0.3089892197470995 1.1386463430447316 0.23443983402489627 0.8526081559746905 DLG1	FERMT2	POC1B	CCL24	CLASP1	FLNA	SEMA5A	STIL	MET	NAV3	SDC4	ABL1	RICTOR	MTSS1	CTTN	LPAR1	ARHGEF10L Any process that activates or increases the frequency	rate or extent of the formation	arrangement of constituent parts	or disassembly of cytoskeletal structures. [GOC:ai] http://amigo.geneontology.org/amigo/term/GO:0051495 2025.1.Hs up
GOBP_POSITIVE_REGULATION_OF_NEURON_PROJECTION_DEVELOPMENT GO:0010976 M16634 66 0.3124182106782015 1.1354255317904738 0.24896265560165975 0.8526081559746905 FIG4	CFLAR	ANKRD27	STAU2	ABL2	LRP8	FGFR1	ABL1	EHD1	KDM1A	PRKCI	CUX2	RYK Any process that increases the rate	frequency or extent of neuron projection development. Neuron projection development is the process whose specific outcome is the progression of a neuron projection over time	from its formation to the mature structure. A neuron projection is any process extending from a neural cell	such as axons or dendrites (collectively called neurites). [GOC:dph	GOC:tb] http://amigo.geneontology.org/amigo/term/GO:0010976 2025.1.Hs up
GOBP_RESPONSE_TO_CARBOHYDRATE GO:0009743 M9582 66 -0.31595997515605007 -1.1350467311444716 0.24615384615384617 0.8526081559746905 COL6A3	RPS6KA2	HIF1A	THBS1	COL6A2	PPP3CB	GPX1	GSTP1	TGFB1	KAT7	ME1	UNC13B	EIF2B3	PPARA	ICAM1 Any process that results in a change in state or activity of a cell or an organism (in terms of movement	secretion	enzyme production	gene expression	etc.) as a result of a carbohydrate stimulus. [GOC:jl] http://amigo.geneontology.org/amigo/term/GO:0009743 2025.1.Hs down
GOBP_PROTEIN_LOCALIZATION_TO_CELL_JUNCTION GO:1902414 M25073 47 0.33395940376676686 1.1331795655987849 0.24493927125506074 0.8526081559746905 DLG1	FERMT2	SCRIB	STAU2	CLSTN3	FLNA A process in which a protein is transported to	or maintained in	a location within a cell junction. [GOC:TermGenie	PMID:18332111] http://amigo.geneontology.org/amigo/term/GO:1902414 2025.1.Hs up
GOBP_NEGATIVE_REGULATION_OF_MITOTIC_CELL_CYCLE GO:0045930 M13508 95 0.29111859944276963 1.1298795830822355 0.2336065573770492 0.8526081559746905 DLG1	TOM1L2	SCRIB	KNTC1	SKA3	BABAM1	FBXO7	BUB1B	PRKDC	CCND1	ABL1	RFWD3	FOXN3	ZNF207	MAD1L1	TAOK1	CCNB1	RBL1	EZH2	WAC	NEK11	GIGYF2	SPC24	XRCC3	ZWILCH	ATF2	FANCD2	BUB1	CLSPN Any process that stops	prevents or reduces the rate or extent of progression through the mitotic cell cycle. [GOC:dph	GOC:go_curators	GOC:tb] http://amigo.geneontology.org/amigo/term/GO:0045930 2025.1.Hs up
GOBP_GLIAL_CELL_DIFFERENTIATION GO:0010001 M15366 83 -0.30055235299233074 -1.1288048624665454 0.2403846153846154 0.8526081559746905 DICER1	TNFRSF21	VIM	ITGB4	PTPN11	CNP	APP	GSTP1	ERCC2	PTN	MAP2K2	TGFB1	EIF2B3	GRB2	COL6A1	GRN	STAT3	RHOA	PSEN1	NF1	NFIA	DLG5 The process in which a relatively unspecialized cell acquires the specialized features of a glial cell. [GOC:go_curators	GOC:mtg_sensu] http://amigo.geneontology.org/amigo/term/GO:0010001 2025.1.Hs down
GOBP_KIDNEY_EPITHELIUM_DEVELOPMENT GO:0072073 M11503 51 0.32675237803363966 1.126445037037504 0.25252525252525254 0.8526081559746905 DLG1	ASXL1	HS3ST3A1	PODXL	AHI1	SDC4	SLIT2	FGFR1	KLHL3	MTSS1	GREB1L The process whose specific outcome is the progression of an epithelium in the kidney over time	from its formation to the mature structure. An epithelium is a tissue that covers the internal or external surfaces of an anatomical structure. [GOC:mtg_kidney_jan10] http://amigo.geneontology.org/amigo/term/GO:0072073 2025.1.Hs up
GOBP_RESPONSE_TO_XENOBIOTIC_STIMULUS GO:0009410 M9008 117 -0.2802607254596691 -1.123388343198076 0.2391713747645951 0.8526081559746905 RBM22	CREB1	HSP90AA1	THBS1	HDAC5	EI24	SEMA3C	ABCC4	PRNP	GPX1	TFRC	ABCC1	SRP68	GSTP1	POR	CYP2S1	EEF2	SUFU	CPT1A	NPAS2	VEGFC	CRKL	TGFB1	BRAF	MYO6	COL6A1	CAD	STAT3 Any process that results in a change in state or activity of a cell or an organism (in terms of movement	secretion	enzyme production	gene expression	etc.) as a result of a stimulus from a xenobiotic	a compound foreign to the organism exposed to it. It may be synthesized by another organism (like ampicilin) or it can be a synthetic chemical. [GOC:jl	GOC:krc] http://amigo.geneontology.org/amigo/term/GO:0009410 2025.1.Hs down
GOBP_REGULATION_OF_VASCULATURE_DEVELOPMENT GO:1901342 M16954 96 -0.2905892490832666 -1.1206446070833977 0.23449612403100775 0.8526081559746905 WARS2	VASH2	CREB3L1	HIF1A	HSPB1	THBS1	JAK1	TGM2	TERT	WNK1	ITGA5	CCM2	HIPK2	SMAD1	VEGFC	ANGPTL4	TGFB1	PRKCA	JUP	HIPK1	RUNX1	TGFBR1	TJP1	ATP2B4	GRN	STAT3 Any process that modulates the frequency	rate or extent of vasculature development. [GOC:TermGenie] http://amigo.geneontology.org/amigo/term/GO:1901342 2025.1.Hs down
GOBP_MAINTENANCE_OF_LOCATION GO:0051235 M12798 84 -0.29736620882208714 -1.11622139514266 0.25146198830409355 0.8526081559746905 UVRAG	LTBP1	BARD1	ANXA6	HK1	PKD2	GPSM2	FBN1	CACNA1C	SRGN	CHCHD10	RANGAP1	ITPR1	DIAPH1	CIZ1	TGFB1 Any process in which a cell	substance or cellular entity	such as a protein complex or organelle	is maintained in a location and prevented from moving elsewhere. [GOC:ai	GOC:dph	GOC:tb] http://amigo.geneontology.org/amigo/term/GO:0051235 2025.1.Hs down
GOBP_CELL_SURFACE_RECEPTOR_PROTEIN_SERINE_THREONINE_KINASE_SIGNALING_PATHWAY GO:0007178 M7385 144 -0.26886207660009614 -1.1103390645939588 0.2320754716981132 0.8526081559746905 CREB1	FNTA	LTBP1	HTRA1	NOMO1	SAP130	THBS1	EXT1	WWTR1	FSTL1	RBPJ	TGFB1I1	FBN1	RBPMS	NOMO3	ITGB5	ADAM9	RUNX2	OVOL2	LTBP3	LPXN	HIPK2	SMAD1	HSP90AB1	BMPR2	CRKL	TGFB1	LTBP2	SPI1	TGFBR1	PTPRK	PPARA	COL1A2 The series of molecular signals initiated by an extracellular ligand binding to a receptor on the surface of the target cell where the receptor possesses serine/threonine kinase activity	and ending with the regulation of a downstream cellular process	e.g. transcription. [GOC:mah	GOC:signaling] http://amigo.geneontology.org/amigo/term/GO:0007178 2025.1.Hs down
GOBP_RNA_LOCALIZATION GO:0006403 M16023 114 0.2790342737659588 1.1100939343286291 0.24893617021276596 0.8526081559746905 NUP214	NUP98	NEAT1	STAU2	IGF2BP3	FBL	FXR1	CPSF6	XPO1	KPNB1	CCT3	RAN	SETD2	NUP188	POM121C	NUP54	SMG1	HNRNPA2B1	XPO5	NUP107 A process in which RNA is transported to	or maintained in	a specific location. [GOC:ai] http://amigo.geneontology.org/amigo/term/GO:0006403 2025.1.Hs up
GOBP_REGULATION_OF_NEUROGENESIS GO:0050767 M3259 124 -0.27607694162717855 -1.1097620195738185 0.2446183953033268 0.8526081559746905 FN1	DICER1	PER2	HIF1A	CUX1	CAPRIN1	ROBO2	NPTN	YAP1	RNF10	NAP1L1	TGM2	PTN	MAP2K2	BMPR2	ETV5	VEGFC	TGFB1	BRAF	NF2	TIAM2	ULK2	LIMK1	PTPRS	WDR62	BAIAP2	ZFYVE27 Any process that modulates the frequency	rate or extent of neurogenesis	the generation of cells in the nervous system. [GOC:ai] http://amigo.geneontology.org/amigo/term/GO:0050767 2025.1.Hs down
GOBP_REGULATION_OF_EPITHELIAL_CELL_PROLIFERATION GO:0050678 M46816 119 0.2774267000849123 1.1074740632193096 0.23739495798319327 0.8526081559746905 DLG1	NEAT1	CFLAR	CCL24	ZEB1	EXTL3	HSPG2	B2M	SEMA5A	PTPRM	AKT3	STK3	PRKDC	RREB1	JUN	CCND1	EAF2	FGFR1	ROBO1	RICTOR Any process that modulates the frequency	rate or extent of epithelial cell proliferation. [GOC:ai] http://amigo.geneontology.org/amigo/term/GO:0050678 2025.1.Hs up
GOBP_BEHAVIOR GO:0007610 M10444 211 -0.2537400702107098 -1.1033921110681781 0.22709163346613545 0.8526081559746905 CREB1	NAV2	HIF1A	CCND2	PPT1	THBS1	PPP3CB	EXT1	PAX5	VDAC1	CNP	NR1D2	GPI	PRNP	EIF4A3	LGMN	APP	VDAC3	NCOA2	MTA1	PTN	LEPR	MEIS1	ITGA5	BBS2	HIPK2	CPT1A	EIF4EBP2	NPAS2	ETV5	PUM1	PRKCA	BRAF	PRKAR2B	ARCN1	PPARA	CSNK1E	COL6A1	DYNLRB1	GRN	STAT3	EP300	OXR1	VPS35	SPG21	PSEN1	EPM2A	MYH14	NF1	CAPN2
GOBP_PROTEIN_TARGETING GO:0006605 M11119 141 -0.2686925693541676 -1.103348588356159 0.2413127413127413 0.8526081559746905 FBXW7	ABLIM3	HSP90AA1	RPL11	CHP1	PITRM1	LONP2	BNIP3L	CHMP4A	PRNP	HUWE1	YWHAE	SRP68	YWHAZ	HSPA4	VPS11	HPS4	ICMT	ZDHHC20	LTBP2	NPEPPS	RAB7A	VPS13D	UBE2J2	SSR1	ATG3	ZDHHC3	PEX6	NAGPA	MFN2	GABARAP	EDEM1	AP4M1	AP3D1	GOLPH3L	TOMM20	PEX1	VPS13C	UBL5	PINK1	TOMM6	AP3B1	GOLPH3	AP4S1 The process of targeting specific proteins to particular regions of the cell	typically membrane-bounded subcellular organelles. Usually requires an organelle specific protein sequence motif. [GOC:ma] http://amigo.geneontology.org/amigo/term/GO:0006605 2025.1.Hs down
GOBP_NEGATIVE_REGULATION_OF_CELL_DIFFERENTIATION GO:0045596 M9266 217 0.2520264336466171 1.099940101098013 0.2315369261477046 0.8526081559746905 COL5A1	CRIM1	FERMT2	ASXL1	TRIO	NFATC3	ZEB1	EXTL3	B2M	LDLR	INPP5D	SOX6	N4BP2L2	SEMA5A	AXIN1	FBXO7	PTBP1	CALR	MMP9	ADAMTS12	PPP3CA	CCND1	SMARCC1	MIB1	SKI	SOD2	GSK3B	SMARCA2	LRP5	IL4R	FOXP1	RYK	TNPO2	ZBTB46	MYB	CTNNA1	SUZ12	TMSB4X	ZNF536	KLF13 Any process that stops	prevents	or reduces the frequency	rate or extent of cell differentiation. [GOC:go_curators] http://amigo.geneontology.org/amigo/term/GO:0045596 2025.1.Hs up
GOBP_INTRACELLULAR_MONOATOMIC_ION_HOMEOSTASIS GO:0006873 M49346 170 -0.2607614070114915 -1.0954232485080293 0.23196881091617932 0.8526081559746905 TPT1	ATP2B1	HIF1A	ANXA6	PPT1	VAPB	CHP1	MT1E	PKD2	SLC31A1	CACNA1C	NPTN	ATP1B3	PRNP	TFRC	TGM2	YWHAE	BOLA2	APP	TMEM165	PACS2	ITPR1	WNK1	SMAD1	DIAPH1	TGFB1	ATP6V0B	RAB7A	ATP2B4	TM9SF4	GRN	SLC9A7	ATP13A1	ATP2A2	SLC39A8	GRINA	PSEN1	OSBPL2 A homeostatic process involved in the maintenance of a steady state level of monoatomic ions within a cell. Monatomic ions (also called simple ions) are ions consisting of exactly one atom. [GOC:mah] http://amigo.geneontology.org/amigo/term/GO:0006873 2025.1.Hs down
GOBP_ORGANELLE_FISSION GO:0048285 M12565 200 0.2543086989480974 1.09420667777904 0.24539877300613497 0.8526081559746905 CORO1C	ACTR2	TOM1L2	PGAM5	MTCH2	KNTC1	TMEM135	CLASP1	FLNA	SKA3	NUSAP1	KPNB1	BUB1B	CALR	FOXJ3	MYBL2	RAN	UCP2	PPP2R1A	LSM14A	FANCA	CDC25C	ORC4	ANAPC7	CENPI	LRP5	KIF22	SUN1	SPIRE1	ZNF207	MAD1L1	UHRF1	AKAP8L	BAZ1B	PHIP	MYO19	DMC1	AURKA	CCNB1	CLASP2	RANBP1	MLH3	INO80	KIFC1	SPC24	CCDC66	NDE1	INSR	XRCC3	TOP2A
GOBP_POSITIVE_REGULATION_OF_RESPONSE_TO_BIOTIC_STIMULUS GO:0002833 M14494 146 -0.26386117989315144 -1.0910695816477671 0.24761904761904763 0.8526081559746905 PCBP2	HSP90AA1	PPT1	PUM2	IRAK3	SLAMF6	PTPN11	RPS19	PHB2	MAPKAPK2	NPLOC4	YWHAE	TRIM62	APP	PAK2	STAT5B	CPT1A	PUM1	PRKCA	TLR1	SPI1	GPATCH3	SCARA3	PTPRS	GRN	ZDHHC3	EP300	CD226	IKBKB	PIK3R1	ITCH	ECSIT	BRCC3	MARK4	RTN4	NONO	AP3B1	SIN3A	MAPKAPK3	MR1	ZNFX1 Any process that activates or increases the frequency	rate	or extent of a response to biotic stimulus. [GOC:add] http://amigo.geneontology.org/amigo/term/GO:0002833 2025.1.Hs down
GOBP_CELLULAR_COMPONENT_DISASSEMBLY GO:0022411 M4053 174 -0.258118548340522 -1.090312267683587 0.23586744639376217 0.8526081559746905 DICER1	UVRAG	TCF25	DDIT4	LAMC1	CST3	IRAK3	DDR1	STX5	KIF5B	CHMP4A	APEH	SPECC1L	CHMP5	WNK1	KLC1	MAP4	MRRF	VCP	TGFB1	PRKCA	ETF1	CAPZB	KLHDC10	VTI1B	TGFBR1	COL6A1	SCAF4	STAT3	GRWD1	NEMF	GABARAP	ATP2A2	TMOD3	ACIN1	GBF1	OGFOD1	DDR2	PIK3R1	CHMP3	GAS2L1	RAC1	CAPG	TECPR1	PLEK	MTRF1	IQSEC1	PRKCB	ADD3 A cellular process that results in the breakdown of a cellular component. [GOC:isa_complete] http://amigo.geneontology.org/amigo/term/GO:0022411 2025.1.Hs down
GOBP_MULTICELLULAR_ORGANISMAL_LEVEL_HOMEOSTASIS GO:0048871 M14669 278 0.24461759352882576 1.0897663124727175 0.23421588594704684 0.8526081559746905 SQSTM1	ETS1	ASXL1	POC1B	SCD	SCRIB	PLEKHM1	PGAM5	B2M	MLLT6	MTCH2	CLSTN3	INPP5D	PTBP3	PICALM	ZNF423	SLC1A5	TRPV1	ERCC6	AKT3	PRKDC	GLIS2	PPP2R3C	USP45	DOCK7	UCP2	PPP2R1A	PDE4B	ABL1	SOD2	KDM1A	LPIN1	EHMT1	IL4R	ABHD6	AXL	RASSF2	ACVR2A	ZFY	BAX	VPS13B	APBB2	MYB	DIAPH3	KMT2E	SFXN5	KLF13	WDR37	RHEB	ARAP1
GOBP_IMMUNE_EFFECTOR_PROCESS GO:0002252 M14818 175 -0.2561426215741286 -1.085125385872152 0.24806201550387597 0.8526081559746905 DNASE1	GALNT2	MLH1	HK1	PPP3CB	IRAK3	SLAMF6	RPS19	PHB2	JAK1	MAPKAPK2	BCR	GPI	KIF5B	ITFG2	TFRC	STXBP1	APP	IL27RA	STAT5B	HMCES	TP53BP1	CBL	TGFB1	MYO1G	SPI1	GRB2	LIMK1	ICAM1	GRN	PLEKHM2	STAT3	EP300	ARL8B	GBF1	PSEN1	CD226	PIK3R1	CD59	BRD4	ERCC1	PIK3CG	RTN4	CTSC	DOCK11 Any process of the immune system that executes a component of an immune response. An effector immune process takes place after its activation. [GO_REF:0000022	GOC:add	ISBN:0781735149] http://amigo.geneontology.org/amigo/term/GO:0002252 2025.1.Hs down
GOBP_CHEMICAL_HOMEOSTASIS GO:0048878 M17520 311 -0.23946468303423896 -1.0834195424833093 0.23483365949119372 0.8526081559746905 TPT1	ATP2B1	FBXW7	RPH3AL	RPS6	LPCAT1	HIF1A	ANXA6	PPT1	HK1	VAPB	PPP3CB	EXT1	CHP1	MT1E	PKD2	SLC31A1	PTPN11	FBN1	CACNA1C	NR1D2	NPTN	ATP1B3	GPI	PRNP	SEC24A	GPX1	TFRC	TGM2	YWHAE	BOLA2	APP	TMEM165	PACS2	GSTP1	GRAMD1B	EIF2AK1	ITPR1	WNK1	LEPR	SMAD1	DIAPH1 Any biological process involved in the maintenance of an internal steady state of a chemical. [GOC:isa_complete] http://amigo.geneontology.org/amigo/term/GO:0048878 2025.1.Hs down
GOBP_HEART_DEVELOPMENT GO:0007507 M8348 230 -0.24679559134622547 -1.0827605362192096 0.251984126984127 0.8526081559746905 FN1	CREB1	RPS6KA2	NCKAP1	HIF1A	ECE1	PPP3CB	EXT1	PKD2	RBPJ	PTPN11	ROBO2	FBN1	SEMA3C	CACNA1C	AXIN2	BICC1	YY1	DHRS3	YAP1	ATM	FHL2	OVOL2	TERT	DYNC2H1	SLIT3	WNK1	MEIS1	CCM2	SMAD1	MAP2K2	SUFU	BMPR2	AP1B1	IFT172	CRKL	TGFB1	PDLIM5	IFT122	MEF2D	RUNX1	TGFBR1	PPARA	COL6A1	CAD	EP300	RHOA	C2CD3	MAML1	PSEN1
GOBP_NEGATIVE_REGULATION_OF_MULTICELLULAR_ORGANISMAL_PROCESS GO:0051241 M1241 334 -0.23718397818595538 -1.080875744773937 0.2495049504950495 0.8526081559746905 FN1	TIMP1	DICER1	ATP2B1	FBXW7	TNFRSF21	CREB3L1	EFEMP1	HIF1A	SAP130	THBS1	CST3	IRAK3	RBPJ	PTPN11	RPS19	ROBO2	PHB2	PAG1	RAB11FIP3	FBN1	MCC	BCR	NPTN	SRGN	PRNP	YY1	RNF10	ATM	NPLOC4	LGMN	TRIM62	APP	OVOL2	IL27RA	LTBP3	GSTP1	EIF2AK3	PTN	WNK1	BBS2	NFKB1	BMPR2	GPR137B	ANGPTL4	TGFB1	PRKCA	RNLS	NF2	SPI1
GOBP_PROTEIN_MODIFICATION_BY_SMALL_PROTEIN_CONJUGATION GO:0032446 M3309 368 -0.23324415426165623 -1.0741264556871184 0.2441860465116279 0.8526081559746905 LMO7	TCF25	FBXW7	PER2	BARD1	RPL5	STX1A	HSP90AA1	HIF1A	RPL11	CAMLG	CHP1	RPS2	WWTR1	UBR5	PPIA	UBA1	NEDD8	CHFR	SUMO2	FBXO9	UBE2R2	USP7	SUMO3	UBA2	RNF10	HUWE1	FBXO33	UBE2F	TRIM62	RNF114	UBA3	ENC1	RANGAP1	UBR4	MTA1	NXN	DCAF17	RPS3	WNK1	VPS11	UBE3C	ZBTB16	HSP90AB1	VCP	BFAR	CBL	SH3RF3	AMBRA1	HERC2P3
GOBP_SUPRAMOLECULAR_FIBER_ORGANIZATION GO:0097435 M24772 325 0.23527005281928762 1.0668816741085048 0.25252525252525254 0.8526081559746905 COL5A1	DLG1	FERMT2	CORO1C	GAS2	ACTR2	CFLAR	CCL24	KRT19	HSPG2	PLEC	B2M	ATXN7	LDLR	KRT5	MID1	CLASP1	KRT7	FLNA	WIPF1	TBCD	SEMA5A	ARHGAP12	AXIN1	KPNB1	MICAL2	SSH2	FKBP1A	HAUS6	MET	NAV3	ADAMTS12	SDC4	SLIT2	TUBGCP3	CAMSAP1	ABL1	ARPC1B	DYRK1A	ARHGEF2	KATNAL1	CTNNA2	OBSCN	RICTOR	RHOG	PRKCI	MTPN	ANXA2	SPIRE1	MTSS1
GOBP_NEGATIVE_REGULATION_OF_TRANSCRIPTION_BY_RNA_POLYMERASE_II GO:0000122 M22135 333 0.23400516844011332 1.0595179285921923 0.2535496957403651 0.8526081559746905 DLG1	SQSTM1	GLIS3	NFATC3	CREBBP	PRRX1	ZEB1	ZBTB49	CNOT1	SP100	NFIC	NRIP1	AEBP2	XPO1	ZNF148	FOXK2	WWC3	MNT	TRPV1	N4BP2L2	CTBP1	CNOT2	DDX5	GLIS2	SMURF2	CALR	HINFP	ZNF85	RREB1	TCFL5	JUN	CCND1	DUSP22	CREM	RALY	FGFR1	PRDM2	SKI	ZNF133	SMARCA2	KDM1A	TLE4	EHMT1	BACH1	HDAC9	CUX2	HSF4	FOXP1	NOC2L	SATB2
GOBP_NEGATIVE_REGULATION_OF_CELL_JUNCTION_ASSEMBLY GO:1901889 M11443 18 -0.4358110742016232 -1.1849919430392717 0.2549800796812749 0.8538660057390018 RPS6	ARHGAP6	THBS1	ROBO2 Any process that stops	prevents or reduces the frequency	rate or extent of cell junction assembly. [GOC:TermGenie] http://amigo.geneontology.org/amigo/term/GO:1901889 2025.1.Hs down
GOBP_REGULATION_OF_CELL_KILLING GO:0031341 M16351 19 -0.4297063605247637 -1.1832607081359088 0.2544731610337972 0.8538660057390018 DNASE1	PPP3CB	SLAMF6	STAT5B	TGFB1	SPI1	GRB2	ICAM1	CD226	CD59 Any process that modulates the frequency	rate or extent of cell killing	the process in which a cell brings about the death of another cell	either in the same or a different organism. [GOC:mah] http://amigo.geneontology.org/amigo/term/GO:0031341 2025.1.Hs down
GOBP_NEURON_PROJECTION_REGENERATION GO:0031102 M14446 24 0.4026905305280425 1.1677458356313184 0.2550607287449393 0.8538660057390018 PTPRF	PRRX1	JUN	MTR	CTNNA1	MAPK8IP3	ADAM17 The regrowth of neuronal processes such as axons or dendrites in response to their loss or damage. [GOC:dgh	GOC:dph	GOC:tb] http://amigo.geneontology.org/amigo/term/GO:0031102 2025.1.Hs up
GOBP_PHOSPHATIDYLINOSITOL_DEPHOSPHORYLATION GO:0046856 M13981 16 0.44047494103415263 1.173716514990066 0.25646123260437376 0.8572806484534926 FIG4	INPP5D The process of removing one or more phosphate groups from a phosphatidylinositol. [ISBN:0198506732] http://amigo.geneontology.org/amigo/term/GO:0046856 2025.1.Hs up
GOBP_ENDODERM_FORMATION GO:0001706 M14962 23 0.3983685882511714 1.1536425913284114 0.2575452716297787 0.8596288844176169 COL5A1	MYH9	ITGB2	MMP9	SETD2 The formation of the endoderm during gastrulation. [GOC:go_curators] http://amigo.geneontology.org/amigo/term/GO:0001706 2025.1.Hs up
GOBP_VENTRICULAR_SEPTUM_MORPHOGENESIS GO:0060412 M10479 17 -0.44505985964550715 -1.1964610326010525 0.25851703406813625 0.861506770320985 RBPJ	ROBO2	SLIT3	BMPR2	TGFBR1 The developmental process in which a ventricular septum is generated and organized. A ventricular septum is an anatomical structure that separates the lower chambers (ventricles) of the heart from one another. [GOC:dph] http://amigo.geneontology.org/amigo/term/GO:0060412 2025.1.Hs down
GOBP_CHEMICAL_SYNAPTIC_TRANSMISSION_POSTSYNAPTIC GO:0099565 M45928 37 0.3544118390093087 1.1357530388392456 0.2588726513569937 0.861506770320985 GABRB3	PRKAR1B	TRPV1	P2RX1	MET	PPP3CA	PRKCZ	GSK3B	GRIN2D	CUX2 The part of synaptic transmission occurring in the post-synapse: a signal transduction pathway consisting of neurotransmitter receptor activation and its effects on postsynaptic membrane potential and the ionic composition of the postsynaptic cytosol. [GOC:dos] http://amigo.geneontology.org/amigo/term/GO:0099565 2025.1.Hs up
GOBP_LOCOMOTION GO:0040011 M40425 400 0.22819656591843718 1.052775554015629 0.2608695652173913 0.8668718737976144 MALAT1	ACTN4	PTK2	FERMT2	ZNF609	ETS1	CORO1C	CCL24	SCRIB	CEMIP	PLXND1	PLEC	SP100	CADM4	KRT5	BVES	CLASP1	DUSP3	FLNA	SEMA5A	PTPRM	ITGB2	AKT3	PODXL	FBXO7	ABL2	SMURF2	CALR	MMP9	MET	RREB1	NAV3	PPP3CA	DOCK7	CMTM7	JUN	DUSP22	ELP3	SDC4	SLIT2	RRAS2	FGFR1	PDE4B	ABL1	ABHD2	SOD2	SH3RF2	ARHGEF2	GSK3B	CTNNA2
GOBP_MUSCLE_CELL_DIFFERENTIATION GO:0042692 M17152 148 0.2670725351530302 1.097447670309197 0.2616033755274262 0.8680300516396041 ACTN4	MYH9	NFATC3	CFLAR	ZEB1	KRT19	PLEC	BVES	SOX6	PTBP1	CALR	RBM4	PPP3CA	SKI	SETD3	SOD2	OBSCN	EHD1	KDM1A	SMYD3	IL4R	HDAC9	FOXP1	TNPO2	GREB1L	CCNB1	NOX4	DCAF8	NFATC1	EZH2 The process in which a relatively unspecialized cell acquires specialized features of a muscle cell. [CL:0000187	GOC:go_curators] http://amigo.geneontology.org/amigo/term/GO:0042692 2025.1.Hs up
GOBP_MATURATION_OF_SSU_RRNA_FROM_TRICISTRONIC_RRNA_TRANSCRIPT_SSU_RRNA_5_8S_RRNA_LSU_RRNA GO:0000462 M13062 15 -0.4542621357916091 -1.17963119039193 0.2638888888888889 0.8683094890510948 RPS21	NOL10	RPS19	RPS16	ERCC2 Any process involved in the maturation of a precursor Small SubUnit (SSU) ribosomal RNA (rRNA) molecule into a mature SSU-rRNA molecule from the pre-rRNA molecule originally produced as a tricistronic rRNA transcript that contains the Small Subunit (SSU) rRNA	5.8S rRNA	and the Large Subunit (LSU) in that order from 5' to 3' along the primary transcript. [GOC:curators] http://amigo.geneontology.org/amigo/term/GO:0000462 2025.1.Hs down
GOBP_REGULATION_OF_HEMATOPOIETIC_PROGENITOR_CELL_DIFFERENTIATION GO:1901532 M14258 20 0.41634164831250853 1.1719682594262086 0.2628458498023715 0.8683094890510948 N4BP2L2	PRKDC	ABL1	MYB	TMSB4X	YTHDF2	HSPA9 Any process that modulates the frequency	rate or extent of hematopoietic progenitor cell differentiation. [GOC:BHF	GOC:rl	GOC:TermGenie] http://amigo.geneontology.org/amigo/term/GO:1901532 2025.1.Hs up
GOBP_CENTRAL_NERVOUS_SYSTEM_NEURON_AXONOGENESIS GO:0021955 M16736 18 0.42605292850144105 1.1631334000800446 0.264 0.8683094890510948 ARHGEF28	B4GALT5	B4GALT6	SLIT2 Generation of a long process from a neuron whose cell body resides in the central nervous system. The process carries efferent (outgoing) action potentials from the cell body towards target cells. [GO_REF:0000021	GOC:cls	GOC:dgh	GOC:dph	GOC:jid] http://amigo.geneontology.org/amigo/term/GO:0021955 2025.1.Hs up
GOBP_POSITIVE_REGULATION_OF_CYTOSOLIC_CALCIUM_ION_CONCENTRATION GO:0007204 M45070 26 0.38799695011414426 1.148104582377281 0.26283367556468173 0.8683094890510948 ASPH	LPAR3	ABL2	ABL1	JPH1	BAX	LPAR1	LRP6	SLC8A1	CIB2 Any process that increases the concentration of calcium ions in the cytosol. [GOC:ai] http://amigo.geneontology.org/amigo/term/GO:0007204 2025.1.Hs up
GOBP_CENTROSOME_DUPLICATION GO:0051298 M15996 42 -0.3452305926346517 -1.137949682584696 0.2633663366336634 0.8683094890510948 CEP85	PKD2	CEP192	CHMP5	CEP135	CCDC57	WDR62	BRCA2	C2CD3	PDCD6IP	CHMP3	CNTROB	CDK5RAP2 The replication of a centrosome	a structure comprised of a pair of centrioles and peri-centriolar material from which a microtubule spindle apparatus is organized. [GOC:ai] http://amigo.geneontology.org/amigo/term/GO:0051298 2025.1.Hs down
GOBP_NEGATIVE_REGULATION_OF_CELL_CELL_ADHESION GO:0022408 M11239 58 0.313289241772073 1.1071814645068938 0.26239669421487605 0.8683094890510948 PTK2	DLG1	SCRIB	DUSP3	TMX1	PODXL	DUSP22	SDC4	ABL1	IL4R	MAD1L1	SERPINE2 Any process that stops	prevents or reduces the rate or extent of cell adhesion to another cell. [GOC:isa_complete] http://amigo.geneontology.org/amigo/term/GO:0022408 2025.1.Hs up
GOBP_REGULATION_OF_PHOSPHORUS_METABOLIC_PROCESS GO:0051174 M16371 228 -0.2442246632535108 -1.069330660943654 0.26452905811623245 0.8687812943671599 FN1	UVRAG	CEP85	CDK5RAP1	LPCAT1	BARD1	DDIT4	HIF1A	HSPB1	THBS1	CHP1	PPIA	PHB2	WDFY2	FBN1	MMD	NPTN	ME2	APP	SYAP1	TOM1L1	ENO1	PAK2	MAP2K2	SMG5	VCP	MAP3K4	TGFB1	ME1	MTMR3	BRAF	STK38	SNX9	SCARB1	PPARA	STAT3	KCTD20	EP300	RHOA	CDC25A	ADAR	AKT1S1	PSEN1	EPM2A	IKBKB	DDR2	LILRA5	CAPN2	CDKN1B	PIK3CG
GOBP_FOREBRAIN_DEVELOPMENT GO:0030900 M11811 148 0.26648520324267855 1.0950342209579025 0.26582278481012656 0.8717594383947819 CORO1C	ARHGAP11B	HERC1	B2M	FXR1	FLNA	TRA2B	SEMA5A	STIL	LRP8	RAN	TACC3	DOCK7	SLIT2	FGFR1	SKI	GSK3B	DCLK2	ROBO1	KDM1A	AXL	SUN1	FOXP1	RYK	BAX	VPS13B	NDST1	OGDH	ZMIZ1	CHD7	SOCS7	LPAR1	WDR37	ALDH1A2	EZH2	XRN2	NR4A3	ARL13B	TTBK2 The process whose specific outcome is the progression of the forebrain over time	from its formation to the mature structure. The forebrain is the anterior of the three primary divisions of the developing chordate brain or the corresponding part of the adult brain (in vertebrates	includes especially the cerebral hemispheres	the thalamus	and the hypothalamus and especially in higher vertebrates is the main control center for sensory and associative information processing	visceral functions	and voluntary motor functions). [PMID:4975589	PMID:4992177] http://amigo.geneontology.org/amigo/term/GO:0030900 2025.1.Hs up
GOBP_OOGENESIS GO:0048477 M11093 24 -0.4006229948140288 -1.1743526863832887 0.2677165354330709 0.8728876328953816 RPS6KA2	MLH1	TAF4B	ATM	PTN The complete process of formation and maturation of an ovum or female gamete from a primordial female germ cell. Examples of this process are found in Mus musculus and Drosophila melanogaster. [GOC:kmv	GOC:mtg_sensu	GOC:pr] http://amigo.geneontology.org/amigo/term/GO:0048477 2025.1.Hs down
GOBP_MULTICELLULAR_ORGANISM_GROWTH GO:0035264 M13366 71 -0.3039430887168586 -1.1102317575778329 0.2675521821631879 0.8728876328953816 CREB1	EXT1	WWTR1	PTPN11	ATM	LGMN	APP	FTO	STAT5B	ERCC2	BBS2	CCM2	PKDCC	ATRX The increase in size or mass of an entire multicellular organism	as opposed to cell growth. [GOC:bf	GOC:curators	GOC:dph	GOC:tb] http://amigo.geneontology.org/amigo/term/GO:0035264 2025.1.Hs down
GOBP_CELL_ACTIVATION_INVOLVED_IN_IMMUNE_RESPONSE GO:0002263 M12069 100 -0.2824230770386216 -1.1027650377786284 0.2674199623352166 0.8728876328953816 DNASE1	MLH1	SLAMF6	JAK1	BCR	ITFG2	TFRC	STXBP1	APP	IL27RA	HMCES	TP53BP1	CBL	TGFB1	SPI1	ICAM1	GRN	STAT3	EP300	GBF1	PSEN1	PIK3R1	BRD4	ERCC1	PIK3CG A change in the morphology or behavior of a cell resulting from exposure to an activating factor such as a cellular or soluble ligand	leading to the initiation or perpetuation of an immune response. [GO_REF:0000022	GOC:add	ISBN:0781735149] http://amigo.geneontology.org/amigo/term/GO:0002263 2025.1.Hs down
GOBP_POSITIVE_REGULATION_OF_MAPK_CASCADE GO:0043410 M11151 126 0.2723865331368849 1.0985125340040034 0.2668067226890756 0.8728876328953816 FERMT2	BCAR3	CFLAR	MAP3K10	RNF13	DHX33	MID1	AXIN1	STK3	LPAR3	GRM4	JUN	DUSP22	PRKCZ	FGFR1	ABL1	SH3RF2	ROBO1	RASSF2	RYK	MAPKBP1	NDST1	MAPK8IP3	LPAR1	TAOK1	NOX4	EZH2	EDA2R	NMNAT1	KSR1	CD40	PTK2B Any process that activates or increases the frequency	rate or extent of signal transduction mediated by the MAPK cascade. [GOC:go_curators] http://amigo.geneontology.org/amigo/term/GO:0043410 2025.1.Hs up
GOBP_EMBRYONIC_SKELETAL_SYSTEM_MORPHOGENESIS GO:0048704 M10927 25 0.3920353634164369 1.152094881134358 0.2685370741482966 0.8742977284047864 DLG1	PRRX1	ZEB1 The process in which the anatomical structures of the skeleton are generated and organized during the embryonic phase. [GOC:dph	GOC:dsf	GOC:jid	GOC:tb	PMID:16049113] http://amigo.geneontology.org/amigo/term/GO:0048704 2025.1.Hs up
GOBP_REGULATION_OF_CENTROSOME_DUPLICATION GO:0010824 M49367 22 0.4031616011492682 1.1693679983921559 0.2723735408560311 0.8771219332708217 POC1B	XPO1	STIL Any process that modulates the frequency	rate or extent of centrosome duplication. Centrosome duplication is the replication of a centrosome	a structure comprised of a pair of centrioles and peri-centriolar material from which a microtubule spindle apparatus is organized. [GOC:dph	GOC:tb] http://amigo.geneontology.org/amigo/term/GO:0010824 2025.1.Hs up
GOBP_POSITIVE_REGULATION_OF_T_CELL_PROLIFERATION GO:0042102 M17020 17 -0.4345745815053318 -1.168273303605012 0.28857715430861725 0.8771219332708217 TFRC	CD276	STAT5B	RPS3	TYK2 Any process that activates or increases the rate or extent of T cell proliferation. [GOC:ai] http://amigo.geneontology.org/amigo/term/GO:0042102 2025.1.Hs down
GOBP_NUCLEAR_MEMBRANE_ORGANIZATION GO:0071763 M24514 17 -0.4334468761296307 -1.165241676490053 0.28857715430861725 0.8771219332708217 CHMP4A	CHMP5	PRKCA	NSFL1C	CHMP3	PRKCB	REEP3	ANKLE2	PLK1 A process that is carried out at the cellular level which results in the assembly	arrangement of constituent parts	or disassembly of the nuclear inner or outer membrane. [GOC:mah] http://amigo.geneontology.org/amigo/term/GO:0071763 2025.1.Hs down
GOBP_ICOSANOID_METABOLIC_PROCESS GO:0006690 M22457 24 -0.3966854011502046 -1.1628103541735655 0.28346456692913385 0.8771219332708217 MAPKAPK2	GPX1	ABCC1	GSTP1	CYP2S1	ABCC10	PLA2G4A	MGLL The chemical reactions and pathways involving icosanoids	any of a group of C20 polyunsaturated fatty acids. [GOC:ma] http://amigo.geneontology.org/amigo/term/GO:0006690 2025.1.Hs down
GOBP_LEUKOCYTE_MEDIATED_CYTOTOXICITY GO:0001909 M11242 29 -0.3856120189767399 -1.1621755921424959 0.2788844621513944 0.8771219332708217 DNASE1	PPP3CB	SLAMF6	KIF5B	STAT5B	TGFB1	SPI1	GRB2	ICAM1	PLEKHM2	ARL8B	CD226	PIK3R1 The directed killing of a target cell by a leukocyte. [GO_REF:0000022	GOC:add	ISBN:0781735149	PMID:11911826] http://amigo.geneontology.org/amigo/term/GO:0001909 2025.1.Hs down
GOBP_COLLAGEN_METABOLIC_PROCESS GO:0032963 M23167 28 -0.38648907524085774 -1.1615229524070556 0.2784313725490196 0.8771219332708217 VIM	CREB3L1	HIF1A	CST3	SUCO	TGFB1	RUNX1	C6orf89	COL6A1	COL1A2 The chemical reactions and pathways involving collagen	any of a group of fibrous proteins of very high tensile strength that form the main component of connective tissue in animals. Collagen is highly enriched in glycine (some regions are 33% glycine) and proline	occurring predominantly as 3-hydroxyproline (about 20%). [GOC:mah	ISBN:0198506732] http://amigo.geneontology.org/amigo/term/GO:0032963 2025.1.Hs down
GOBP_NEGATIVE_REGULATION_OF_PROTEASOMAL_PROTEIN_CATABOLIC_PROCESS GO:1901799 M25029 23 -0.40240200886422844 -1.1605059719288844 0.2712871287128713 0.8771219332708217 RPL11	CAMLG	USP7	HSP90AB1	EIF3H	PSMF1 Any process that stops	prevents or reduces the frequency	rate or extent of proteasomal protein catabolic process. [GOC:BHF	GOC:rl	GOC:TermGenie	PMID:21669198] http://amigo.geneontology.org/amigo/term/GO:1901799 2025.1.Hs down
GOBP_MONOSACCHARIDE_CATABOLIC_PROCESS GO:0046365 M11279 15 -0.44660289391173724 -1.1597416158393248 0.28174603174603174 0.8771219332708217 TPI1	HK1	NUDT5	GPI	ENO1	GLB1 The chemical reactions and pathways resulting in the breakdown of monosaccharides	polyhydric alcohols containing either an aldehyde or a keto group and between three to ten or more carbon atoms. [ISBN:0198506732] http://amigo.geneontology.org/amigo/term/GO:0046365 2025.1.Hs down
GOBP_REGULATION_OF_RUFFLE_ASSEMBLY GO:1900027 M11232 15 0.4435968878720718 1.15780916167605 0.28313253012048195 0.8771219332708217 CORO1C	PLEKHM1	RHOG	WDPCP	FAM98A Any process that modulates the frequency	rate or extent of ruffle assembly. [GOC:TermGenie	GOC:yaf] http://amigo.geneontology.org/amigo/term/GO:1900027 2025.1.Hs up
GOBP_VESICLE_COATING GO:0006901 M45067 17 -0.4301445236813231 -1.1563639133427277 0.2905811623246493 0.8771219332708217 TRAPPC4	AP3S1	TRAPPC9	TFG	PREB	GBF1	AP3D1	TRAPPC11	SAR1A	TRAPPC8 A protein coat is added to the vesicle to form the proper shape of the vesicle and to target the vesicle for transport to its destination. [GOC:jid] http://amigo.geneontology.org/amigo/term/GO:0006901 2025.1.Hs down
GOBP_FATTY_ACID_TRANSPORT GO:0015908 M15938 28 -0.3846529636314469 -1.156004851342536 0.2823529411764706 0.8771219332708217 THBS1	ABCC4	CPT1A	GOT2	FABP6	ABCD4	PLA2G4A	PPARA The directed movement of fatty acids into	out of or within a cell	or between cells	by means of some agent such as a transporter or pore. Fatty acids are aliphatic monocarboxylic acids liberated from naturally occurring fats and oils by hydrolysis. [GOC:ai] http://amigo.geneontology.org/amigo/term/GO:0015908 2025.1.Hs down
GOBP_POSITIVE_REGULATION_OF_DNA_REPLICATION GO:0045740 M10227 19 -0.4189982770057145 -1.153774399224737 0.2882703777335984 0.8771219332708217 BAZ1A	CIZ1	KAT7	ATRX	FAF1	CDC25A	CDKN1B	BRPF3	ATF1	ATAD5 Any process that activates or increases the frequency	rate or extent of DNA replication. [GOC:go_curators] http://amigo.geneontology.org/amigo/term/GO:0045740 2025.1.Hs down
GOBP_AMINO_ACID_BIOSYNTHETIC_PROCESS GO:0008652 M11377 28 -0.3834736070366037 -1.1524605085868467 0.28627450980392155 0.8771219332708217 PSAT1	SERINC3	GOT2	ENOPH1	ATP2B4	CAD	ASL	SEPHS1	SHMT1	SLC38A1	APIP	GLUD1	ALDH18A1 The chemical reactions and pathways resulting in the formation of amino acids	organic acids containing one or more amino substituents. [ISBN:0198506732] http://amigo.geneontology.org/amigo/term/GO:0008652 2025.1.Hs down
GOBP_TERPENOID_METABOLIC_PROCESS GO:0006721 M29052 15 0.4403217912183047 1.1492610022665104 0.2971887550200803 0.8771219332708217 HMGCS1	LDLR	LRP8 The chemical reactions and pathways involving terpenoids	any member of a class of compounds characterized by an isoprenoid chemical structure and including derivatives with various functional groups. [ISBN:0198506732] http://amigo.geneontology.org/amigo/term/GO:0006721 2025.1.Hs up
GOBP_NUCLEAR_TRANSCRIBED_MRNA_CATABOLIC_PROCESS_NONSENSE_MEDIATED_DECAY GO:0000184 M15478 25 -0.39059329679682675 -1.146994434844535 0.28429423459244535 0.8771219332708217 EIF3E	PABPC1	EIF4A3	CTIF	SMG5	ETF1 The nonsense-mediated decay pathway for nuclear-transcribed mRNAs degrades mRNAs in which an amino-acid codon has changed to a nonsense codon; this prevents the translation of such mRNAs into truncated	and potentially harmful	proteins. [GOC:krc	GOC:ma	PMID:10025395] http://amigo.geneontology.org/amigo/term/GO:0000184 2025.1.Hs down
GOBP_POSITIVE_REGULATION_OF_CHROMOSOME_SEGREGATION GO:0051984 M16418 15 0.4390997216697975 1.146071342108491 0.30120481927710846 0.8771219332708217 SKA3	MAD1L1	CCNB1	RAD18	NCAPG Any process that activates or increases the frequency	rate or extent of chromosome segregation	the process in which genetic material	in the form of chromosomes	is organized and then physically separated and apportioned to two or more sets. [GOC:ai] http://amigo.geneontology.org/amigo/term/GO:0051984 2025.1.Hs up
GOBP_AUTOPHAGOSOME_MATURATION GO:0097352 M24764 29 -0.3801252062936126 -1.1456391786875693 0.29880478087649404 0.8771219332708217 UVRAG	CHMP4A	CHMP5	VCP	VTI1B	GABARAP	ATP2A2	CHMP3	TECPR1	VPS33B	VPS33A	MFSD8	TMEM39A	WIPI2	UBQLN4	ELP6 Removal of PI3P and Atg8/LC3 after the closure of the phagophore and before the fusion with the endosome/lysosome (e.g. mammals and insects) or vacuole (yeast)	and that very likely destabilizes other Atg proteins and thus enables their efficient dissociation and recycling. [GOC:autophagy	GOC:lf	PMID:28077293] http://amigo.geneontology.org/amigo/term/GO:0097352 2025.1.Hs down
GOBP_INNATE_IMMUNE_RESPONSE_ACTIVATING_CELL_SURFACE_RECEPTOR_SIGNALING_PATHWAY GO:0002220 M45808 29 0.3763156488695992 1.145471429806767 0.286 0.8771219332708217 SQSTM1	CREBBP The series of molecular signals initiated by a ligand binding to a cell surface receptor that leads to the activation of an innate immune response. [GOC:add	ISBN:0781735149	PMID:15199967] http://amigo.geneontology.org/amigo/term/GO:0002220 2025.1.Hs up
GOBP_SOMATIC_DIVERSIFICATION_OF_IMMUNOGLOBULINS GO:0016445 M34109 30 -0.3756474813281209 -1.1434976827493648 0.2934131736526946 0.8771219332708217 MLH1	YY1	TFRC	IL27RA	HMCES	TP53BP1	TGFB1	SAMHD1	MCM3AP	ERCC1	PCYT1A	HSPD1	MSH6	ATAD5	CTNNBL1	APLF The somatic process that results in the generation of sequence diversity of immunoglobulins. [GOC:add	GOC:ma	ISBN:0781735149] http://amigo.geneontology.org/amigo/term/GO:0016445 2025.1.Hs down
GOBP_POSITIVE_REGULATION_OF_FAT_CELL_DIFFERENTIATION GO:0045600 M10890 24 -0.3894551678280773 -1.1416162538974202 0.3031496062992126 0.8771219332708217 CREB1	WDFY2	AXIN2	SYAP1	ZBTB16 Any process that activates or increases the frequency	rate or extent of adipocyte differentiation. [GOC:go_curators] http://amigo.geneontology.org/amigo/term/GO:0045600 2025.1.Hs down
GOBP_NEGATIVE_REGULATION_OF_ERK1_AND_ERK2_CASCADE GO:0070373 M10186 24 0.39367183354264923 1.1415928842974397 0.2732793522267207 0.8771219332708217 DLG1	DUSP3	ABL1	SEMA6A	CNKSR3 Any process that stops	prevents	or reduces the frequency	rate or extent of signal transduction mediated by the ERK1 and ERK2 cascade. [GOC:add	ISBN:0121245462	ISBN:0896039986] http://amigo.geneontology.org/amigo/term/GO:0070373 2025.1.Hs up
GOBP_REGULATION_OF_GLUCONEOGENESIS GO:0006111 M16528 20 -0.41346012274436494 -1.141577503363583 0.2903225806451613 0.8771219332708217 USP7	LEPR	NNMT	PPARA	EP300	CLK2	DDB1	KAT2A	SIRT6 Any process that modulates the frequency	rate or extent of gluconeogenesis	the formation of glucose from noncarbohydrate precursors	such as pyruvate	amino acids and glycerol. [GOC:go_curators] http://amigo.geneontology.org/amigo/term/GO:0006111 2025.1.Hs down
GOBP_POSITIVE_REGULATION_OF_LAMELLIPODIUM_ASSEMBLY GO:0010592 M13928 17 -0.42458447730396986 -1.1414167580651062 0.30060120240480964 0.8771219332708217 NCKAP1	HSP90AA1	ACTR3	CYFIP1	PIK3R1	ABI2	RAC1 Any process that increases the rate	frequency or extent of the formation of a lamellipodium	a thin sheetlike extension of the surface of a migrating cell. [GOC:dph	GOC:tb] http://amigo.geneontology.org/amigo/term/GO:0010592 2025.1.Hs down
GOBP_NEGATIVE_REGULATION_OF_LIPID_METABOLIC_PROCESS GO:0045833 M10685 26 -0.3825002412268939 -1.1405789744846648 0.2815533980582524 0.8771219332708217 FBXW7	LPCAT1	UBR4	NFKB1	ANGPTL4	ASXL3	DCAF5	PIK3CG Any process that stops	prevents	or reduces the frequency	rate or extent of the chemical reactions and pathways involving lipids. [GOC:go_curators] http://amigo.geneontology.org/amigo/term/GO:0045833 2025.1.Hs down
GOBP_REGULATION_OF_FIBROBLAST_MIGRATION GO:0010762 M11312 17 0.42408802624607905 1.140559349641463 0.2823061630218688 0.8771219332708217 PTK2	CORO1C Any process that modulates the rate	frequency or extent of fibroblast cell migration. Fibroblast cell migration is accomplished by extension and retraction of a pseudopodium. [GOC:dph	GOC:tb] http://amigo.geneontology.org/amigo/term/GO:0010762 2025.1.Hs up
GOBP_NEGATIVE_REGULATION_OF_IMMUNE_EFFECTOR_PROCESS GO:0002698 M16089 22 -0.40674590099396196 -1.140521595700266 0.2807377049180328 0.8771219332708217 PPP3CB	IRAK3	RPS19	BCR	TGFB1	SPI1	GRB2	GRN	CD59 Any process that stops	prevents	or reduces the frequency	rate	or extent of an immune effector process. [GOC:add] http://amigo.geneontology.org/amigo/term/GO:0002698 2025.1.Hs down
GOBP_G0_TO_G1_TRANSITION GO:0045023 M23678 18 -0.419089491362268 -1.139525129292514 0.29880478087649404 0.8771219332708217 ARID1B	ACTB The mitotic cell cycle phase transition whose occurrence commits the cell from the G0 quiescent state to the G1 phase. Under certain conditions	cells exit the cell cycle during G1 and remain in the G0 state as nongrowing	non-dividing (quiescent) cells. Appropriate stimulation of such cells induces them to return to G1 and resume growth and division. The G0 to G1 transition is accompanied by many changes in the program of gene expression. [GOC:mtg_cell_cycle	ISBN:0716731363] http://amigo.geneontology.org/amigo/term/GO:0045023 2025.1.Hs down
GOBP_SKELETAL_MUSCLE_CELL_DIFFERENTIATION GO:0035914 M15486 19 -0.41377810576531193 -1.1393998772582334 0.3121272365805169 0.8771219332708217 PAX5	DDX17	NR1D2	EEF2	COL6A1 The process in which a relatively unspecialized cell acquires specialized features of a skeletal muscle cell	a somatic cell located in skeletal muscle. [CL:0000188	GOC:BHF	GOC:vk] http://amigo.geneontology.org/amigo/term/GO:0035914 2025.1.Hs down
GOBP_RESPONSE_TO_ESTROGEN GO:0043627 M13475 22 0.3927730226733266 1.1392359838750938 0.29766536964980544 0.8771219332708217 KRT19	ASH2L	CCND1	ARPC1B	TRIM25	CTNNA1 Any process that results in a change in state or activity of a cell or an organism (in terms of movement	secretion	enzyme production	gene expression	etc.) as a result of stimulus by an estrogen	C18 steroid hormones that can stimulate the development of female sexual characteristics. [GOC:jl	ISBN:0198506732] http://amigo.geneontology.org/amigo/term/GO:0043627 2025.1.Hs up
GOBP_PROTEIN_LOCALIZATION_TO_SYNAPSE GO:0035418 M15091 32 0.36653637268237504 1.1382313038519352 0.281496062992126 0.8771219332708217 DLG1	SCRIB	STAU2	CLSTN3 Any process in which a protein is transported to	and/or maintained at the synapse	the junction between a nerve fiber of one neuron and another neuron or muscle fiber or glial cell. [GOC:bf] http://amigo.geneontology.org/amigo/term/GO:0035418 2025.1.Hs up
GOBP_RUFFLE_ASSEMBLY GO:0097178 M24749 18 0.41668890908453626 1.1375694313470772 0.292 0.8771219332708217 CORO1C	PLEKHM1	RHOG	PIP5K1A	WDPCP	FAM98A The aggregation	arrangement and bonding together of a set of components to form a ruffle	a projection at the leading edge of a crawling cell; the protrusions are supported by a microfilament meshwork. The formation of ruffles (also called membrane ruffling) is thought to be controlled by a group of enzymes known as Rho GTPases	specifically RhoA	Rac1 and cdc42. [GOC:yaf	PMID:12556481	Wikipedia:Membrane_ruffling] http://amigo.geneontology.org/amigo/term/GO:0097178 2025.1.Hs up
GOBP_GLYCOSYL_COMPOUND_METABOLIC_PROCESS GO:1901657 M14640 15 -0.4380154220944836 -1.137441607090871 0.2976190476190476 0.8771219332708217 ADK	ICMT	NT5C3A	TYW1B	ADA	APOBEC3C	DNPH1 The chemical reactions and pathways involving glycosyl compound. [GOC:pr	GOC:TermGenie] http://amigo.geneontology.org/amigo/term/GO:1901657 2025.1.Hs down
GOBP_CELL_FATE_SPECIFICATION GO:0001708 M15496 30 -0.37358536329534797 -1.1372204486156643 0.3013972055888224 0.8771219332708217 RBPJ	MTA1	SUFU	MGA	CHD3	PSEN1	GATAD2B	NFIA	EYA1	GLI3 The cellular developmental process involved in cell fate commitment in which the cell is designated to follow a developmental path	unless they receive extrinsic cues that direct an alternative fate. [GOC:go_curators] http://amigo.geneontology.org/amigo/term/GO:0001708 2025.1.Hs down
GOBP_RAC_PROTEIN_SIGNAL_TRANSDUCTION GO:0016601 M16065 33 -0.36537726607978305 -1.1367014679091605 0.294 0.8771219332708217 FNTA	SSX2IP	NCKAP1	FARP1	CYFIP1	CRKL	GABARAP	NF1	ABI2	PIK3CG	RTN4	RAC1	ARHGAP24	ELMO1 An intracellular signaling cassette in which a small monomeric GTPase of the Rac subfamily relays a signal. [GOC:bf] http://amigo.geneontology.org/amigo/term/GO:0016601 2025.1.Hs down
GOBP_REGULATION_OF_CALCIUM_MEDIATED_SIGNALING GO:0050848 M10452 31 -0.3707365963611308 -1.1364692342462532 0.3024193548387097 0.8771219332708217 PPP3CB	CHP1	PRNP	FHL2	APP	ITPR1	SPPL3	CAMTA1	ATP2B4	PLEK	ADA	PLCG2	PDGFRA	LRRK2	SYK Any process that modulates the frequency	rate or extent of calcium-mediated signaling	the process in which a cell uses calcium ions to convert an extracellular signal into a response. [GOC:ai] http://amigo.geneontology.org/amigo/term/GO:0050848 2025.1.Hs down
GOBP_NEGATIVE_REGULATION_OF_MYELOID_LEUKOCYTE_DIFFERENTIATION GO:0002762 M13329 18 -0.4174268705835491 -1.1350043808679338 0.3047808764940239 0.8771219332708217 FBXW7	FBN1	GPR137B	RUNX1	PIK3R1	NF1 Any process that stops	prevents	or reduces the frequency	rate	or extent of myeloid leukocyte differentiation. [GOC:add] http://amigo.geneontology.org/amigo/term/GO:0002762 2025.1.Hs down
GOBP_REGULATION_OF_LYMPHOCYTE_MIGRATION GO:2000401 M16579 19 -0.41201099378276385 -1.1345338702173515 0.3220675944333996 0.8771219332708217 CD99L2	P4HB	APP	IL27RA	WNK1	CRKL Any process that modulates the frequency	rate or extent of lymphocyte migration. [GOC:mah] http://amigo.geneontology.org/amigo/term/GO:2000401 2025.1.Hs down
GOBP_PHAGOCYTOSIS_ENGULFMENT GO:0006911 M45812 15 0.4342125090633607 1.1333154827111567 0.3192771084337349 0.8771219332708217 MYH9	ARHGAP12	ITGB2 The internalization of bacteria	immune complexes and other particulate matter or of an apoptotic cell by phagocytosis	including the membrane and cytoskeletal processes required	which involves one of three mechanisms: zippering of pseudopods around a target via repeated receptor-ligand interactions	sinking of the target directly into plasma membrane of the phagocytosing cell	or induced uptake via an enhanced membrane ruffling of the phagocytosing cell similar to macropinocytosis. [GOC:curators	ISBN:0781735149] http://amigo.geneontology.org/amigo/term/GO:0006911 2025.1.Hs up
GOBP_MYELOID_DENDRITIC_CELL_ACTIVATION GO:0001773 M16283 15 -0.4360289749504832 -1.132283186820944 0.2976190476190476 0.8771219332708217 RBPJ	TGFB1	SPI1	PSEN1	DOCK2 The change in morphology and behavior of a dendritic cell resulting from exposure to a cytokine	chemokine	cellular ligand	or soluble factor. [GOC:mgi_curators	ISBN:0781735149] http://amigo.geneontology.org/amigo/term/GO:0001773 2025.1.Hs down
GOBP_CILIUM_MOVEMENT GO:0003341 M13169 45 -0.34002708576134427 -1.1319871211213428 0.2874251497005988 0.8771219332708217 VANGL1	EFCAB6	VDAC3	CEP128	INPP5B	DYNC2H1	DNAAF5	BBS2	DNHD1	KIAA0319L	ATP2B4	RFX3 The directed	self-propelled movement of a cilium. [GOC:dph	GOC:jl] http://amigo.geneontology.org/amigo/term/GO:0003341 2025.1.Hs down
GOBP_NEGATIVE_REGULATION_OF_RESPONSE_TO_CYTOKINE_STIMULUS GO:0060761 M14154 32 -0.3657771296539566 -1.131337276724173 0.32186234817813764 0.8771219332708217 DICER1	IRAK3	GSTP1	SLIT3	SAMHD1	ADAR	TANK	IL1RN	METTL3 Any process that decreases the rate	frequency	or extent of a response to cytokine stimulus. [GOC:BHF	GOC:dph	GOC:tb] http://amigo.geneontology.org/amigo/term/GO:0060761 2025.1.Hs down
GOBP_RECEPTOR_METABOLIC_PROCESS GO:0043112 M13654 34 -0.3606268590800874 -1.129972329884757 0.2874251497005988 0.8771219332708217 UVRAG	CAMLG	ECE1	CHMP5	LGMN	EPS15	TGFB1	NEDD4L	KIF16B	PEX6	PSEN1	ITCH	PEX1 The chemical reactions and pathways involving a receptor molecule	a macromolecule that undergoes combination with a hormone	neurotransmitter	drug or intracellular messenger to initiate a change in cell function. [GOC:jl] http://amigo.geneontology.org/amigo/term/GO:0043112 2025.1.Hs down
GOBP_NEGATIVE_REGULATION_OF_REPRODUCTIVE_PROCESS GO:2000242 M10204 18 -0.41509676277928287 -1.128668702088943 0.31274900398406374 0.8771219332708217 TIMP1	RPS6KA2	CHFR Any process that stops	prevents	or reduces the frequency	rate or extent of reproductive process. [GOC:mah] http://amigo.geneontology.org/amigo/term/GO:2000242 2025.1.Hs down
GOBP_NEGATIVE_REGULATION_OF_PROTEIN_LOCALIZATION_TO_NUCLEUS GO:1900181 M24954 20 -0.40819947903140275 -1.1270526866144677 0.31048387096774194 0.8771219332708217 CHP1	EI24	APP	YWHAZ	SUFU	MARK3	NF1	SIN3A Any process that stops	prevents or reduces the frequency	rate or extent of protein localization to nucleus. [GOC:TermGenie] http://amigo.geneontology.org/amigo/term/GO:1900181 2025.1.Hs down
GOBP_POSITIVE_REGULATION_OF_EPITHELIAL_CELL_MIGRATION GO:0010634 M14851 23 0.38871942569627327 1.1256994120158819 0.3038229376257545 0.8771219332708217 PTK2	CLASP1	MMP9	RREB1	JUN Any process that activates or increases the frequency	rate or extent of epithelial cell migration. [GOC:BHF	GOC:dph	GOC:tb] http://amigo.geneontology.org/amigo/term/GO:0010634 2025.1.Hs up
GOBP_RESPONSE_TO_ALKALOID GO:0043279 M12438 29 -0.3733428804158901 -1.1251982867932713 0.3147410358565737 0.8771219332708217 CREB1	HSP90AA1	HDAC5	FKBP5	TGM2	CPT1A Any process that results in a change in state or activity of a cell or an organism (in terms of movement	secretion	enzyme production	gene expression	etc.) as a result of an alkaloid stimulus. Alkaloids are a large group of nitrogenous substances found in naturally in plants	many of which have extracts that are pharmacologically active. [GOC:jl] http://amigo.geneontology.org/amigo/term/GO:0043279 2025.1.Hs down
GOBP_ACTIVATION_OF_PROTEIN_KINASE_ACTIVITY GO:0032147 M15758 17 -0.41854563615510887 -1.1251824516901505 0.3226452905811623 0.8771219332708217 PPIA	FBN1	TOM1L1 Any process that initiates the activity of an inactive protein kinase. [GOC:mah] http://amigo.geneontology.org/amigo/term/GO:0032147 2025.1.Hs down
GOBP_POSITIVE_REGULATION_OF_ERK1_AND_ERK2_CASCADE GO:0070374 M15144 38 -0.34550752518255473 -1.1238930220180072 0.2876190476190476 0.8771219332708217 FBXW7	CD44	PTPN11	PHB2	APP	CRKL	TGFB1	PRKCA	GNAI2	BRAF Any process that activates or increases the frequency	rate or extent of signal transduction mediated by the ERK1 and ERK2 cascade. [GOC:mah] http://amigo.geneontology.org/amigo/term/GO:0070374 2025.1.Hs down
GOBP_POSTSYNAPTIC_DENSITY_ORGANIZATION GO:0097106 M49544 17 0.4177035105394137 1.123388576991672 0.3061630218687873 0.8771219332708217 DLG1	FGFR1	CSMD2	PTK2B A process that results in the assembly	arrangement of constituent parts	or disassembly of a postsynaptic density	a region that lies adjacent to the cytoplasmic face of the postsynaptic membrane at excitatory synapse. [GOC:BHF	GOC:sjp	PMID:21525273] http://amigo.geneontology.org/amigo/term/GO:0097106 2025.1.Hs up
GOBP_POSITIVE_REGULATION_OF_ACTIN_FILAMENT_BUNDLE_ASSEMBLY GO:0032233 M15855 27 0.3762625848105736 1.1232063559531502 0.3097165991902834 0.8771219332708217 FERMT2	FLNA	SDC4	ABL1	MTSS1	LPAR1	ARHGEF10L Any process that activates or increases the frequency	rate or extent of the assembly of actin filament bundles. [GOC:mah] http://amigo.geneontology.org/amigo/term/GO:0032233 2025.1.Hs up
GOBP_POSITIVE_REGULATION_OF_CANONICAL_WNT_SIGNALING_PATHWAY GO:0090263 M14526 48 -0.3330416446992375 -1.1229783709058578 0.2759295499021526 0.8771219332708217 RBPJ	UBR5	YAP1	RPS12	WNK1	NFKB1	PLEKHA4	LRRK1	WLS	VCP	TGFB1	JUP	RUVBL1	CSNK1E	VPS35	GID8 Any process that increases the rate	frequency	or extent of the Wnt signaling pathway through beta-catenin	the series of molecular signals initiated by binding of a Wnt protein to a frizzled family receptor on the surface of the target cell	followed by propagation of the signal via beta-catenin	and ending with a change in transcription of target genes. [GOC:tb] http://amigo.geneontology.org/amigo/term/GO:0090263 2025.1.Hs down
GOBP_CELLULAR_RESPONSE_TO_TOPOLOGICALLY_INCORRECT_PROTEIN GO:0035967 M11845 47 -0.33397781494951073 -1.1224708742014298 0.2874015748031496 0.8771219332708217 CREB3L1	VAPB	UBR5	EIF2AK3	UBR4	EDEM2	ATF6	VCP	BFAR Any process that results in a change in state or activity of a cell (in terms of movement	secretion	enzyme production	gene expression	etc.) as a result of a protein that is not folded in its correct three-dimensional structure. [GOC:bf] http://amigo.geneontology.org/amigo/term/GO:0035967 2025.1.Hs down
GOBP_GLYCOSAMINOGLYCAN_METABOLIC_PROCESS GO:0030203 M49393 23 -0.38911061366805416 -1.1221742957427658 0.299009900990099 0.8771219332708217 CD44	CSGALNACT1	EXT1	XYLT1	NFKB1	TGFB1 The chemical reactions and pathways involving glycosaminoglycans	any of a group of linear polysaccharides composed of repeating disaccharide units. [PMID:38500384] http://amigo.geneontology.org/amigo/term/GO:0030203 2025.1.Hs down
GOBP_ACIDIC_AMINO_ACID_TRANSPORT GO:0015800 M14313 19 -0.4073326718093227 -1.1216514112180909 0.33001988071570576 0.8771219332708217 PER2	STXBP1	SLC25A13	PSEN1	EPM2A	NF1 The directed movement of acidic amino acids	amino acids with a pH below 7	into	out of or within a cell	or between cells	by means of some agent such as a transporter or pore. [GOC:ai] http://amigo.geneontology.org/amigo/term/GO:0015800 2025.1.Hs down
GOBP_GRANULOCYTE_CHEMOTAXIS GO:0071621 M34241 27 0.3754698841727605 1.120840012790946 0.3117408906882591 0.8771219332708217 PTK2	CCL24	ITGB2	SLIT2	PDE4B The movement of a granulocyte in response to an external stimulus. [GOC:rph] http://amigo.geneontology.org/amigo/term/GO:0071621 2025.1.Hs up
GOBP_NEGATIVE_REGULATION_OF_INNATE_IMMUNE_RESPONSE GO:0045824 M11125 28 -0.37283938755045243 -1.1205012869545108 0.30980392156862746 0.8771219332708217 IRAK3	RPS19	YWHAZ	TGFB1	SAMHD1	GRB2	GRN	ADAR Any process that stops	prevents	or reduces the frequency	rate or extent of the innate immune response. [GOC:go_curators] http://amigo.geneontology.org/amigo/term/GO:0045824 2025.1.Hs down
GOBP_NEGATIVE_REGULATION_OF_CELL_SUBSTRATE_ADHESION GO:0010812 M12057 25 0.3808194883048518 1.1191342007740679 0.28857715430861725 0.8771219332708217 ACTN4	CORO1C	TBCD	DUSP22 Any process that decreases the frequency	rate or extent of cell-substrate adhesion. Cell-substrate adhesion is the attachment of a cell to the underlying substrate via adhesion molecules. [GOC:dph	GOC:pf	GOC:tb] http://amigo.geneontology.org/amigo/term/GO:0010812 2025.1.Hs up
GOBP_GLYCOSPHINGOLIPID_METABOLIC_PROCESS GO:0006687 M29051 20 0.39748761163593016 1.1188956623498243 0.3142292490118577 0.8771219332708217 ST3GAL3	B4GALT5	B4GALT6	UGCG	CREM	BAX The chemical reactions and pathways involving glycosphingolipids	any compound with residues of sphingoid and at least one monosaccharide. [ISBN:0198547684] http://amigo.geneontology.org/amigo/term/GO:0006687 2025.1.Hs up
GOBP_EXTRACELLULAR_MATRIX_ASSEMBLY GO:0085029 M11366 17 -0.41594877542976494 -1.1182012724226225 0.33266533066132264 0.8771219332708217 TGFB1	NTN4	TGFBR1	EFEMP2	COL6A1	COL1A2	THSD4 The aggregation	arrangement and bonding together of the extracellular matrix. [GOC:jl] http://amigo.geneontology.org/amigo/term/GO:0085029 2025.1.Hs down
GOBP_SMOOTH_MUSCLE_CELL_DIFFERENTIATION GO:0051145 M10794 22 0.38493291543912944 1.1164957961253221 0.321011673151751 0.8771219332708217 NFATC3	ZEB1	SOD2	NFATC1	PIAS1	RBPMS2 The process in which a relatively unspecialized cell acquires specialized features of a smooth muscle cell; smooth muscle lacks transverse striations in its constituent fibers and are almost always involuntary. [CL:0000192	GOC:ai] http://amigo.geneontology.org/amigo/term/GO:0051145 2025.1.Hs up
GOBP_OSTEOCLAST_DIFFERENTIATION GO:0030316 M16135 35 -0.351012329728156 -1.116492416510515 0.3036750483558994 0.8771219332708217 FBXW7	CREB1	FBN1	TFRC	LRRK1	GPR137B	TGFB1	SPI1 The process in which a relatively unspecialized monocyte acquires the specialized features of an osteoclast. An osteoclast is a specialized phagocytic cell associated with the absorption and removal of the mineralized matrix of bone tissue. [CL:0000092	GOC:add	ISBN:0781735149	PMID:12161749] http://amigo.geneontology.org/amigo/term/GO:0030316 2025.1.Hs down
GOBP_DIGESTIVE_TRACT_MORPHOGENESIS GO:0048546 M13216 17 -0.4148523060474494 -1.1152536174927314 0.3346693386773547 0.8771219332708217 NCKAP1	HIF1A	OVOL2 The process in which the anatomical structures of the digestive tract are generated and organized. The digestive tract is the anatomical structure through which food passes and is processed. [GOC:dph	GOC:go_curators	PMID:12618131] http://amigo.geneontology.org/amigo/term/GO:0048546 2025.1.Hs down
GOBP_TOLL_LIKE_RECEPTOR_SIGNALING_PATHWAY GO:0002224 M11996 30 -0.36633976283323677 -1.1151643248550078 0.3253493013972056 0.8771219332708217 IRAK3	MAPKAPK2	YWHAE	APP	TLR1	IKBKB	AP3B1	MAPKAPK3	PLCG2	HSPD1	PRKCE	HSP90B1	SCIMP The series of molecular signals initiated by a ligand binding to a toll-like receptor of a target cell. Toll-like receptors directly bind pattern motifs from a variety of microbial sources to initiate an innate immune response. [GO_REF:0000022	GOC:add	ISBN:0781735149	PMID:12467241	PMID:12524386	PMID:12855817	PMID:15585605	PMID:15728447] http://amigo.geneontology.org/amigo/term/GO:0002224 2025.1.Hs down
GOBP_NUCLEOSIDE_DIPHOSPHATE_METABOLIC_PROCESS GO:0009132 M10329 55 -0.3212117225397201 -1.1146599082554964 0.2918287937743191 0.8771219332708217 GAPDH	DDIT4	HIF1A	TPI1	HK1	NUDT5	GPI	APP	ENO1	ALDOA	MPP1	PPARA	COL6A1	CAD	STAT3	EP300	PSEN1 The chemical reactions and pathways involving a nucleoside diphosphate	a compound consisting of a nucleobase linked to a deoxyribose or ribose sugar esterified with diphosphate on the sugar. [GOC:go_curators	ISBN:0198506732] http://amigo.geneontology.org/amigo/term/GO:0009132 2025.1.Hs down
GOBP_PROTEIN_LOCALIZATION_TO_POSTSYNAPSE GO:0062237 M34225 21 0.390917675700862 1.114108233958062 0.3248031496062992 0.8771219332708217 DLG1	SCRIB Any process in which a protein is transported to	and/or maintained at the postsynapse	the part of a synapse that is part of the post-synaptic cell. [PMID:31189538] http://amigo.geneontology.org/amigo/term/GO:0062237 2025.1.Hs up
GOBP_NUCLEAR_TRANSCRIBED_MRNA_CATABOLIC_PROCESS_DEADENYLATION_DEPENDENT_DECAY GO:0000288 M14218 34 0.3509978478311902 1.1140484199573693 0.2954091816367265 0.8771219332708217 CNOT6L	CNOT1	CNOT10	TNRC6B	CNOT2	CNOT6	PAN3	SAMD4A A major pathway of degradation of nuclear-transcribed mRNAs that proceeds through a series of ordered steps that includes poly(A) tail shortening and that can regulate mRNA stability. [GOC:jp	GOC:krc] http://amigo.geneontology.org/amigo/term/GO:0000288 2025.1.Hs up
GOBP_MODIFICATION_OF_SYNAPTIC_STRUCTURE GO:0099563 M24871 18 -0.4096910240136671 -1.1139702300614374 0.3247011952191235 0.8771219332708217 CAP1	KIF5B	CYFIP1	BAIAP2	RHOA	DLGAP4	AGAP1 Any process that modifies the structure/morphology of a synapse. [GOC:dos] http://amigo.geneontology.org/amigo/term/GO:0099563 2025.1.Hs down
GOBP_MITOCHONDRIAL_RNA_METABOLIC_PROCESS GO:0000959 M13702 22 -0.397061306911476 -1.1133658489068146 0.3012295081967213 0.8771219332708217 WARS2	CDK5RAP1	CHCHD10 The chemical reactions and pathways involving RNA transcribed from the mitochondrial genome and occurring in the mitochondrion. [GOC:krc	GOC:mah] http://amigo.geneontology.org/amigo/term/GO:0000959 2025.1.Hs down
GOBP_REGULATION_OF_EXTRINSIC_APOPTOTIC_SIGNALING_PATHWAY_VIA_DEATH_DOMAIN_RECEPTORS GO:1902041 M12226 19 0.4007780051580368 1.1130752000509798 0.2965931863727455 0.8771219332708217 CFLAR	SP100	STK3	ARHGEF2	GSK3B Any process that modulates the frequency	rate or extent of extrinsic apoptotic signaling pathway via death domain receptors. [GOC:TermGenie	PMID:17245429] http://amigo.geneontology.org/amigo/term/GO:1902041 2025.1.Hs up
GOBP_NEGATIVE_REGULATION_OF_BMP_SIGNALING_PATHWAY GO:0030514 M13373 21 0.3905413269128795 1.1130356467879379 0.32677165354330706 0.8771219332708217 CRIM1	SMURF2	ABL1	SKI	CTDSPL2 Any process that stops	prevents	or reduces the frequency	rate or extent of the BMP signaling pathway. [GOC:go_curators] http://amigo.geneontology.org/amigo/term/GO:0030514 2025.1.Hs up
GOBP_REGULATION_OF_NUCLEOTIDE_EXCISION_REPAIR GO:2000819 M45294 15 -0.42849463848606595 -1.1127179675520171 0.32142857142857145 0.8771219332708217 ARID1B	ACTB Any process that modulates the frequency	rate or extent of nucleotide-excision repair. [GOC:jp	PMID:18836076] http://amigo.geneontology.org/amigo/term/GO:2000819 2025.1.Hs down
GOBP_B_CELL_ACTIVATION_INVOLVED_IN_IMMUNE_RESPONSE GO:0002312 M16926 36 -0.34736170905577163 -1.1124118863710588 0.3096153846153846 0.8771219332708217 MLH1	ITFG2	TFRC	IL27RA	HMCES	TP53BP1	TGFB1	SPI1	ERCC1	DOCK11	ADA	PLCG2	PCYT1A	HSPD1	MSH6	ATAD5 The change in morphology and behavior of a mature or immature B cell during an immune response	resulting from exposure to a mitogen	cytokine	chemokine	cellular ligand	or an antigen for which it is specific. [GOC:jal] http://amigo.geneontology.org/amigo/term/GO:0002312 2025.1.Hs down
GOBP_ATP_METABOLIC_PROCESS GO:0046034 M23771 78 -0.2993665463529283 -1.1120110602388191 0.2739463601532567 0.8771219332708217 GAPDH	DDIT4	HIF1A	TPI1	HK1	NUDT5	GPI	NDUFB2	APP	ENO1	ALDOA	VCP	SLC25A13	TGFB1	NDUFS3	PPARA	COL6A1	STAT3	EP300	PSEN1	NDUFA12 The chemical reactions and pathways involving ATP	adenosine triphosphate	a universally important coenzyme and enzyme regulator. [GOC:go_curators] http://amigo.geneontology.org/amigo/term/GO:0046034 2025.1.Hs down
GOBP_PROTEIN_EXPORT_FROM_NUCLEUS GO:0006611 M42633 39 -0.3401673282330709 -1.111989916244636 0.31334622823984526 0.8771219332708217 RBM22	BARD1	CHP1	PTPN11	XPO6	YWHAE	RANGAP1	XPO7	RANBP3	TGFB1 The directed movement of a protein from the nucleus into the cytoplasm. [GOC:jl] http://amigo.geneontology.org/amigo/term/GO:0006611 2025.1.Hs down
GOBP_REGULATION_OF_MICROTUBULE_POLYMERIZATION GO:0031113 M12587 28 0.3708490786262171 1.1108458259974476 0.3089430894308943 0.8771219332708217 CLASP1	TBCD	HAUS6	MET	NAV3	CAMSAP1	ABL1	DYRK1A Any process that modulates the frequency	rate or extent of microtubule polymerization. [GOC:mah] http://amigo.geneontology.org/amigo/term/GO:0031113 2025.1.Hs up
GOBP_FACE_MORPHOGENESIS GO:0060325 M45181 17 0.41274370301012764 1.1100494716648293 0.3260437375745527 0.8771219332708217 ASPH	ANKRD11	TIPARP	SKI The process in which the anatomical structures of the face are generated and organized. The face is the ventral division of the head. [GOC:dph] http://amigo.geneontology.org/amigo/term/GO:0060325 2025.1.Hs up
GOBP_CARDIAC_MUSCLE_CELL_ACTION_POTENTIAL_INVOLVED_IN_CONTRACTION GO:0086002 M24635 17 0.41248634795402966 1.109357330653426 0.3260437375745527 0.8771219332708217 DLG1	FLNA An action potential that occurs in a cardiac muscle cell and is involved in its contraction. [GOC:BHF	GOC:mtg_cardiac_conduct_nov11] http://amigo.geneontology.org/amigo/term/GO:0086002 2025.1.Hs up
GOBP_REGULATION_OF_MITOTIC_SISTER_CHROMATID_SEGREGATION GO:0033047 M40414 25 0.37705935376572897 1.1080840962193461 0.3026052104208417 0.8771219332708217 KNTC1	SKA3	BUB1B	ZNF207	MAD1L1	CCNB1	SPC24	XRCC3	ZWILCH	BUB1 Any process that modulates the frequency	rate or extent of sister chromatid segregation during mitosis. [GOC:mah] http://amigo.geneontology.org/amigo/term/GO:0033047 2025.1.Hs up
GOBP_MEIOTIC_CHROMOSOME_SEGREGATION GO:0045132 M10086 30 -0.36397414923833876 -1.1079632286184982 0.3313373253493014 0.8771219332708217 ESPL1	MLH1	CHFR	ATM	ACTR3 The process in which genetic material	in the form of chromosomes	is organized into specific structures and then physically separated and apportioned to two or more sets during M phase of the meiotic cell cycle. [GOC:ai	GOC:mah] http://amigo.geneontology.org/amigo/term/GO:0045132 2025.1.Hs down
GOBP_REGULATION_OF_OSTEOCLAST_DIFFERENTIATION GO:0045670 M10369 21 -0.39646287166261374 -1.106990986644168 0.3259109311740891 0.8771219332708217 FBXW7	CREB1	FBN1 Any process that modulates the frequency	rate or extent of osteoclast differentiation. [GOC:go_curators] http://amigo.geneontology.org/amigo/term/GO:0045670 2025.1.Hs down
GOBP_AXONAL_TRANSPORT GO:0098930 M42973 34 -0.3531893967157848 -1.106668112618026 0.3253493013972056 0.8771219332708217 HIF1A	HSPB1	KIF5B	DYNC1H1	AP3S1	NDEL1	ARL8B	AP3D1	AP3B1	DLG2	KIF1B The directed movement of organelles or molecules along microtubules in axons. [ISBN:0815316194] http://amigo.geneontology.org/amigo/term/GO:0098930 2025.1.Hs down
GOBP_NEGATIVE_REGULATION_OF_LYMPHOCYTE_ACTIVATION GO:0051250 M23970 42 0.33482011557380487 1.1060328584193948 0.30181086519114686 0.8771219332708217 DLG1	SCRIB	INPP5D	DUSP3	FBXO7	DUSP22	SDC4	IL4R	AXL Any process that stops	prevents	or reduces the frequency	rate or extent of lymphocyte activation. [GOC:ai] http://amigo.geneontology.org/amigo/term/GO:0051250 2025.1.Hs up
GOBP_ENDOTHELIAL_CELL_PROLIFERATION GO:0001935 M3696 50 0.32125641243036407 1.1058567162790123 0.2787878787878788 0.8771219332708217 DLG1	CCL24	HSPG2	SEMA5A	PTPRM	AKT3	JUN	FGFR1	RICTOR The multiplication or reproduction of endothelial cells	resulting in the expansion of a cell population. Endothelial cells are thin flattened cells which line the inside surfaces of body cavities	blood vessels	and lymph vessels	making up the endothelium. [GOC:add	ISBN:0781735149] http://amigo.geneontology.org/amigo/term/GO:0001935 2025.1.Hs up
GOBP_REGULATION_OF_VIRAL_PROCESS GO:0050792 M42844 48 -0.3277868235327909 -1.1052597143749998 0.3111545988258317 0.8771219332708217 MX1	PABPC1	VAPB	PPIA	P4HB	TRIM62 Any process that modulates the rate or extent of the viral life cycle	the set of processes by which a virus reproduces and spreads among hosts. [GOC:go_curators	GOC:tb] http://amigo.geneontology.org/amigo/term/GO:0050792 2025.1.Hs down
GOBP_POSITIVE_REGULATION_OF_EPITHELIAL_TO_MESENCHYMAL_TRANSITION GO:0010718 M10621 22 0.3809202539716468 1.104857093691659 0.32879377431906615 0.8771219332708217 PTK2	FERMT2 Any process that increases the rate	frequency	or extent of epithelial to mesenchymal transition. Epithelial to mesenchymal transition is where an epithelial cell loses apical/basolateral polarity	severs intercellular adhesive junctions	degrades basement membrane components and becomes a migratory mesenchymal cell. [GOC:BHF	GOC:dph	GOC:tb] http://amigo.geneontology.org/amigo/term/GO:0010718 2025.1.Hs up
GOBP_SPINDLE_LOCALIZATION GO:0051653 M10835 28 0.3687745417007675 1.1046317329409137 0.31910569105691056 0.8771219332708217 MYH9	ACTR2	CLASP1	SKA3	NUSAP1	KPNB1	FBXW11	HTT	SPIRE1	GPSM1 Any process in which is the spindle is transported to	and/or maintained in	a specific location. [GOC:ai] http://amigo.geneontology.org/amigo/term/GO:0051653 2025.1.Hs up
GOBP_RENAL_TUBULE_DEVELOPMENT GO:0061326 M13089 31 0.356912442389467 1.1045694579597263 0.3201581027667984 0.8771219332708217 DLG1	C1orf54	HS3ST3A1	AHI1	KLHL3	MTSS1	GREB1L	LAMA5 The progression of the renal tubule over time from its formation to the mature form. A renal tubule is a tube that filters	re-absorbs and secretes substances to rid an organism of waste and to play a role in fluid homeostasis. [GOC:dph	GOC:mtg_kidney_jan10] http://amigo.geneontology.org/amigo/term/GO:0061326 2025.1.Hs up
GOBP_ORGANELLE_FUSION GO:0048284 M16852 68 -0.3049034209082348 -1.1043963720108163 0.2984790874524715 0.8771219332708217 UVRAG	RPH3AL	STX1A	STX5	RAB2A	CHMP4A	CHMP5	HUWE1	TFRC	STXBP1	USO1	VPS11	VTI1B	RAB7A	KIAA0319L	PIP4K2A	ARL8B	MFN2 The creation of a single organelle from two or more organelles. [GOC:jid] http://amigo.geneontology.org/amigo/term/GO:0048284 2025.1.Hs down
GOBP_REGULATION_OF_GLIOGENESIS GO:0014013 M16014 30 -0.3627697594545963 -1.1042969803530571 0.3333333333333333 0.8771219332708217 DICER1	RNF10	PTN	ETV5	VEGFC	TGFB1	NF2 Any process that modulates the frequency	rate or extent of gliogenesis	the formation of mature glia. [GOC:ef] http://amigo.geneontology.org/amigo/term/GO:0014013 2025.1.Hs down
GOBP_NEGATIVE_REGULATION_OF_MYELOID_CELL_DIFFERENTIATION GO:0045638 M14891 28 -0.36705087703689954 -1.1031049664568326 0.3333333333333333 0.8771219332708217 FBXW7	FBN1	STAT5B	MEIS1	ZBTB16	GPR137B	RUNX1	PIK3R1	NF1 Any process that stops	prevents	or reduces the frequency	rate or extent of myeloid cell differentiation. [GOC:go_curators] http://amigo.geneontology.org/amigo/term/GO:0045638 2025.1.Hs down
GOBP_ARTERY_DEVELOPMENT GO:0060840 M11359 42 0.3339292877707799 1.103090129546458 0.3038229376257545 0.8771219332708217 NFATC3	PRRX1	PLXND1	LDLR	AKT3	ADAMTS6	NPRL3	ROBO1	NDST1	ZMIZ1	CHD7 The progression of the artery over time	from its initial formation to the mature structure. An artery is a blood vessel that carries blood away from the heart to a capillary bed. [GOC:dph	GOC:sdb_2009	GOC:tb] http://amigo.geneontology.org/amigo/term/GO:0060840 2025.1.Hs up
GOBP_RESPONSE_TO_IONIZING_RADIATION GO:0010212 M10262 64 -0.30911004466990083 -1.1030451600878024 0.2876190476190476 0.8771219332708217 BARD1	CCND2	YAP1	GPX1	ATM	EYA3	MTA1	SWI5	TP53BP1	CBL	TGFB1	GRB2	TOPBP1	BRCA2	DNMT3A	CLK2	XRRA1	EYA1	BRCC3	ERCC1	TANK Any process that results in a change in state or activity of a cell or an organism (in terms of movement	secretion	enzyme production	gene expression	etc.) as a result of a ionizing radiation stimulus. Ionizing radiation is radiation with sufficient energy to remove electrons from atoms and may arise from spontaneous decay of unstable isotopes	resulting in alpha and beta particles and gamma rays. Ionizing radiation also includes X-rays. [PMID:12509526] http://amigo.geneontology.org/amigo/term/GO:0010212 2025.1.Hs down
GOBP_REGULATION_OF_MITOTIC_NUCLEAR_DIVISION GO:0007088 M642 45 0.3281392666069834 1.101315045443545 0.27345309381237526 0.8771219332708217 TOM1L2	KNTC1	SKA3	NUSAP1	BUB1B	CDC25C	ANAPC7	LRP5	ZNF207	MAD1L1	PHIP	AURKA	CCNB1	SPC24	INSR	XRCC3	ZWILCH	BUB1	CUL7	PRMT5	DYNC1LI1	NSMCE2	CUL3 Any process that modulates the frequency	rate or extent of mitosis. [GOC:go_curators] http://amigo.geneontology.org/amigo/term/GO:0007088 2025.1.Hs up
GOBP_RESPONSE_TO_FATTY_ACID GO:0070542 M14177 18 0.4029786708700246 1.1001401944528673 0.336 0.8771219332708217 SCD	LDLR	UCP2	CCNB1	FOXO3	PDK3	CAT	CDK4 Any process that results in a change in state or activity of a cell or an organism (in terms of movement	secretion	enzyme production	gene expression	etc.) as a result of a fatty acid stimulus. [GOC:lp] http://amigo.geneontology.org/amigo/term/GO:0070542 2025.1.Hs up
GOBP_HEMOSTASIS GO:0007599 M14945 82 -0.29361756366655994 -1.0997982818939944 0.2746615087040619 0.8771219332708217 MYL9	ACTB	HSPB1	THBS1	TLN1	PPIA	GPI	STXBP1	VCL	HPS4	PABPC4	ANGPTL4	PRKCA	PLA2G4A	ANXA8	ACTG1	ANO6	CD59	PIK3CG	FLI1	PRRG1	PLEK	AP3B1	METAP1	VPS33B	SVEP1	PLAUR	LCK	PLCG2	DGKA	ITPR3	PDGFRA	PRKG1	CSRP1	EPHB2	SYK	F3	COL3A1 The stopping of bleeding (loss of body fluid) or the arrest of the circulation to an organ or part. [ISBN:0198506732] http://amigo.geneontology.org/amigo/term/GO:0007599 2025.1.Hs down
GOBP_POSTSYNAPTIC_SPECIALIZATION_ORGANIZATION GO:0099084 M24846 20 0.39055716895982684 1.099387023535796 0.3359683794466403 0.8771219332708217 DLG1	FGFR1	ABL1 A process that results in the assembly	arrangement of constituent parts	or disassembly of a postsynaptic specialization	a structure that lies adjacent to the cytoplasmic face of the postsynaptic membrane. [GOC:BHF	GOC:sjp	PMID:21525273	PMID:26834556] http://amigo.geneontology.org/amigo/term/GO:0099084 2025.1.Hs up
GOBP_LUNG_ALVEOLUS_DEVELOPMENT GO:0048286 M16792 21 -0.3935802118246589 -1.0989421157756427 0.3340080971659919 0.8771219332708217 CREB1	FBN1	LTBP3	BMPR2	PKDCC	TGFB1	COL6A1	MYOCD	ADA	IGFBP5	TMEM38B The process whose specific outcome is the progression of the alveolus over time	from its formation to the mature structure. The alveolus is a sac for holding air in the lungs; formed by the terminal dilation of air passageways. [GOC:mtg_lung	PMID:9751757] http://amigo.geneontology.org/amigo/term/GO:0048286 2025.1.Hs down
GOBP_CALCIUM_ION_REGULATED_EXOCYTOSIS GO:0017156 M13877 23 -0.38102520235151477 -1.098856399928008 0.3346534653465347 0.8771219332708217 RPH3AL	STX1A	PPP3CB	STXBP1	GNAI2	UNC13B	ARL8B	ATP2A2 The release of intracellular molecules (e.g. hormones	matrix proteins) contained within a membrane-bounded vesicle by fusion of the vesicle with the plasma membrane of a cell	induced by a rise in cytosolic calcium-ion levels. [GOC:go_curators] http://amigo.geneontology.org/amigo/term/GO:0017156 2025.1.Hs down
GOBP_NON_CANONICAL_NF_KAPPAB_SIGNAL_TRANSDUCTION GO:0038061 M13738 46 0.3250869162567499 1.0986996817832575 0.29435483870967744 0.8771219332708217 ACTN4	DLG1	CALR	MAP3K14	RASSF2	LITAF	AGO3	LETMD1	RC3H2	NR3C2	EZR An intracellular signaling cassette characterized by the NIK-dependent processing and activation of NF-kappaB. Begins with activation of the NF-kappaB-inducing kinase (NIK)	which in turn phosphorylates and activates IkappaB kinase alpha (IKKalpha). IKKalpha phosphorylates the NF-kappa B2 protein (p100) leading to p100 processing and release of an active NF-kappaB (p52). The non-canonical NF-kappaB signaling pathway is generally activated by ligands of the TNF receptor superfamily	including lymphotoxin beta (LTB)	CD40	OX40	RANK	TWEAK and B cell-activating factor (BAFF). [GOC:bf	GOC:mg2	GOC:signaling	GOC:vs	PMID:11239468	PMID:15140882	PMID:34659217] http://amigo.geneontology.org/amigo/term/GO:0038061 2025.1.Hs up
GOBP_SMOOTH_MUSCLE_CELL_PROLIFERATION GO:0048659 M23873 51 -0.3231004830766863 -1.0972277430494881 0.3175542406311637 0.8771219332708217 THBS1	NOTCH3	TERT	GSTP1	BMPR2	TGFB1	PRKCA	GNAI2	MEF2D	EFEMP2	MFN2	DDR2	PIK3R1	NF1	CDKN1B	MYOCD	MAP3K5	IGFBP5	CTNNBIP1	DNMT1	MEF2C	PRKG1 The multiplication or reproduction of smooth muscle cells	resulting in the expansion of a cell population. [CL:0000192	GOC:ebc	PMID:1840698] http://amigo.geneontology.org/amigo/term/GO:0048659 2025.1.Hs down
GOBP_NEGATIVE_REGULATION_OF_VIRAL_GENOME_REPLICATION GO:0045071 M15907 16 -0.4171924036791616 -1.0966477075760672 0.3306613226452906 0.8771219332708217 MX1 Any process that stops	prevents	or reduces the frequency	rate or extent of viral genome replication. [GOC:go_curators] http://amigo.geneontology.org/amigo/term/GO:0045071 2025.1.Hs down
GOBP_VACUOLE_ORGANIZATION GO:0007033 M1054 108 -0.2769251308043706 -1.0966194379514176 0.27631578947368424 0.8771219332708217 PPT1	PPP3CB	EXT1	CLVS1	CHMP4A	CHMP5	ATM	TMEM165	PACS2	WIPI1	VPS11	HPS4	AMBRA1	MTMR3	ATP6V0B	RAB7A	ULK2	TMEM63A	GRN	ATG3	PIP4K2A	NAGPA	ARL8B	MFN2	GABARAP	ATP2A2	VPS35	AP4M1	PSEN1	NSFL1C	EPM2A	CHMP3 A process that is carried out at the cellular level which results in the assembly	arrangement of constituent parts	or disassembly of a vacuole. [GOC:mah] http://amigo.geneontology.org/amigo/term/GO:0007033 2025.1.Hs down
GOBP_SEQUESTERING_OF_CALCIUM_ION GO:0051208 M34204 46 0.3240991223698685 1.095361224358761 0.2963709677419355 0.8771219332708217 ASPH	CEMIP	FLNA	CALR	FKBP1A	PDE4D	ABL1	JPH1	HTT	BAX	TRPC1	CHD7 The process of binding or confining calcium ions such that they are separated from other components of a biological system. [GOC:ai] http://amigo.geneontology.org/amigo/term/GO:0051208 2025.1.Hs up
GOBP_EMBRYONIC_SKELETAL_SYSTEM_DEVELOPMENT GO:0048706 M10808 34 0.34509236515908626 1.0953047334060286 0.3213572854291417 0.8771219332708217 DLG1	PRRX1	ZEB1	PCSK5	ACVR2A	SATB2	MBTD1	NDST1 The process	occurring during the embryonic phase	whose specific outcome is the progression of the skeleton over time	from its formation to the mature structure. [GOC:dph	GOC:dsf	GOC:jid	GOC:tb	PMID:16049113] http://amigo.geneontology.org/amigo/term/GO:0048706 2025.1.Hs up
GOBP_REGULATION_OF_NON_CANONICAL_NF_KAPPAB_SIGNAL_TRANSDUCTION GO:1901222 M13660 35 0.3450675098690414 1.0949894688671225 0.3237113402061856 0.8771219332708217 ACTN4	DLG1	CALR	RASSF2	LITAF	AGO3	RC3H2	NR3C2	EZR Any process that modulates the frequency	rate or extent of the non-canonical NF-kappaB signaling cascade. [GOC:TermGenie] http://amigo.geneontology.org/amigo/term/GO:1901222 2025.1.Hs up
GOBP_HOMEOSTASIS_OF_NUMBER_OF_CELLS GO:0048872 M18350 132 0.2685202382911462 1.0946223725646744 0.2766393442622951 0.8771219332708217 ETS1	ASXL1	POC1B	B2M	MTCH2	INPP5D	PTBP3	SLC1A5	AKT3	PRKDC	GLIS2	PPP2R3C	PPP2R1A	PDE4B	ABL1	AXL	RASSF2	ACVR2A	ZFY	BAX	MYB	DIAPH3	KMT2E	KLF13	WDR37	ARSG	EZH2	ADAM17	SLC15A4	FOXO3	BRD1	RC3H2	MED1	HSPA9	GIGYF2 Any biological process involved in the maintenance of the steady-state number of cells within a population of cells. [GOC:isa_complete] http://amigo.geneontology.org/amigo/term/GO:0048872 2025.1.Hs up
GOBP_REGULATION_OF_DEVELOPMENTAL_GROWTH GO:0048638 M10722 111 -0.2751478721498324 -1.0938276645220542 0.27902621722846443 0.8771219332708217 FN1	CREB1	PUM2	RBPJ	YY1	YAP1	LGMN	APP	FTO	STAT5B	BBS2	BMPR2	NEDD4L	RUNX1	TGFBR1	ULK2	LIMK1	PPARA	PTPRS	GRN	SPAG9	STAT3	ZFYVE27 Any process that modulates the frequency	rate or extent of developmental growth. [GOC:go_curators] http://amigo.geneontology.org/amigo/term/GO:0048638 2025.1.Hs down
GOBP_POST_GOLGI_VESICLE_MEDIATED_TRANSPORT GO:0006892 M19178 59 -0.31032894737513905 -1.0924799959493208 0.31021194605009633 0.8771219332708217 RAB11FIP3	RAB31	AP3S1	WIPI1	BBS2	EPS15	PKDCC	VTI1B	STXBP5	KLHL20	KIF16B	AP4M1	GBF1	AP3D1	GOLPH3L	RABEP1	ANKFY1	VPS13C	GOLPH3	MYO5A	DNM2	CCDC91	COMMD1	ARL3	SORT1 The directed movement of substances from the Golgi to other parts of the cell	including organelles and the plasma membrane	mediated by small transport vesicles. [GOC:ai	GOC:mah] http://amigo.geneontology.org/amigo/term/GO:0006892 2025.1.Hs down
GOBP_BASEMENT_MEMBRANE_ORGANIZATION GO:0071711 M16086 16 -0.4155949194073284 -1.0924485000901563 0.3366733466933868 0.8771219332708217 LAMC1	EXT1	LAMB1	NID2	NID1	NTN4	COL6A1 A process that is carried out at the cellular level which results in the assembly	arrangement of constituent parts	or disassembly of the basement membrane. [GOC:mah] http://amigo.geneontology.org/amigo/term/GO:0071711 2025.1.Hs down
GOBP_ADAPTIVE_IMMUNE_RESPONSE GO:0002250 M13847 97 -0.28108797217140274 -1.0920639726605255 0.2729007633587786 0.8771219332708217 BACH2	TNFRSF21	MLH1	PPP3CB	SLAMF6	JAK1	PAG1	TFRC	IL27RA	HMCES	TP53BP1	TGFB1	TYK2	MYO1G	PLA2G4A	ICAM1	STAT3	EP300	CD226	BRD4	ERCC1	PIK3CG	CTSC	PRKCB	ADA	MR1	ADCY7	C1QBP	MEF2C	IL20RB	PCYT1A	EIF2AK4	C1R	EPHB2	HSPD1	SYK	MSH6	ATAD5	CTNNBL1 An immune response mediated by cells expressing specific receptors for antigens produced through a somatic diversification process	and allowing for an enhanced secondary response to subsequent exposures to the same antigen (immunological memory). [GO_REF:0000022	GOC:add	ISBN:0781735149] http://amigo.geneontology.org/amigo/term/GO:0002250 2025.1.Hs down
GOBP_REGULATION_OF_FAT_CELL_DIFFERENTIATION GO:0045598 M10293 45 0.32536418765208763 1.0920012067282872 0.2934131736526946 0.8771219332708217 FERMT2	ASXL1	TRIO	AXIN1	STK3	RREB1	SOD2	LRP5 Any process that modulates the frequency	rate or extent of adipocyte differentiation. [GOC:go_curators] http://amigo.geneontology.org/amigo/term/GO:0045598 2025.1.Hs up
GOBP_NEGATIVE_REGULATION_OF_MOLECULAR_FUNCTION GO:0044092 M13509 105 -0.2770035822144003 -1.090997650688741 0.2883895131086142 0.8771219332708217 TIMP1	CEP85	GAPDH	CDK5RAP1	RPL5	RPL11	CHP1	PPIA	PHB2	COMMD7	USP7	SUMO3	CPNE1	PAK2 Any process that stops or reduces the rate or extent of a molecular function	an elemental biological activity occurring at the molecular level	such as catalysis or binding. [GO:jl] http://amigo.geneontology.org/amigo/term/GO:0044092 2025.1.Hs down
GOBP_NEGATIVE_REGULATION_OF_DEFENSE_RESPONSE GO:0031348 M13454 67 -0.3019674932063968 -1.0902373743414555 0.3135755258126195 0.8771219332708217 PCBP2	IRAK3	RPS19	NR1D2	BCR	GPX1	GSTP1	YWHAZ	NFKB1	TGFB1	SAMHD1	ELF4	GRB2	PPARA	GRN	STAT3	SLC39A8	ADAR	VPS35	ITCH Any process that stops	prevents	or reduces the frequency	rate or extent of a defense response. [GOC:mah] http://amigo.geneontology.org/amigo/term/GO:0031348 2025.1.Hs down
GOBP_PROTEIN_FOLDING GO:0006457 M13856 94 -0.28244678333101414 -1.0900278751649035 0.27099236641221375 0.8771219332708217 HSP90AA1	HSPB1	ST13	CCT6B	PPIA	PFDN2	FKBP5	P4HB	AHSA1	NUDC	HSPA4	HSP90AB1	ATF6	DNAJC7	UGGT1	LYRM7	TTC1	VAPA	CDC123	PDIA4	LMAN2L	GRN	CCT6A	PDIA6	PPIL2 The process of assisting in the covalent and noncovalent assembly of single chain polypeptides or multisubunit complexes into the correct tertiary structure. [GOC:go_curators	GOC:rb] http://amigo.geneontology.org/amigo/term/GO:0006457 2025.1.Hs down
GOBP_REGULATION_OF_NEURON_DIFFERENTIATION GO:0045664 M12739 52 -0.3186188584310548 -1.0897847136535903 0.33659491193737767 0.8771219332708217 EIF4ENIF1	CDK5RAP1	TCF12	NOTCH3	MMD	APP	CPNE1	MEIS1	ETV5	WDR62	SPAG9	RHOA	TCF4	CDK5RAP2	EYA1	RAC1	SIN3A	GLI3	MEF2C	ZFHX3	LRRK2	TIAM1	EIF2AK4 Any process that modulates the frequency	rate or extent of neuron differentiation. [GOC:go_curators] http://amigo.geneontology.org/amigo/term/GO:0045664 2025.1.Hs down
GOBP_MESENCHYMAL_CELL_DIFFERENTIATION GO:0048762 M12556 89 -0.2851700697598381 -1.0893561193294972 0.2737864077669903 0.8771219332708217 FN1	SEMA4G	HIF1A	EXT1	WWTR1	RBPJ	TGFB1I1	DDX17	SEMA3C	AXIN2	TRIM62	OVOL2 The process in which a relatively unspecialized cell acquires specialized features of a mesenchymal cell. A mesenchymal cell is a loosely associated cell that is part of the connective tissue in an organism. Mesenchymal cells give rise to more mature connective tissue cell types. [GOC:dph	GOC:jid] http://amigo.geneontology.org/amigo/term/GO:0048762 2025.1.Hs down
GOBP_POSITIVE_REGULATION_OF_INTRACELLULAR_TRANSPORT GO:0032388 M11997 66 -0.3032053362760546 -1.0892272846765545 0.3096153846153846 0.8771219332708217 RBM22	HSP90AA1	UBR5	KIF20B	YWHAE	DYNC1H1	EHD2	VPS11	EDEM2	PGAP1	TGFB1	JUP	NF2	TM9SF4	STX18	EP300	EDEM1	PSEN1	PIK3R1 Any process that activates or increases the frequency	rate or extent of the directed movement of substances within cells. [GOC:mah] http://amigo.geneontology.org/amigo/term/GO:0032388 2025.1.Hs down
GOBP_CELL_SURFACE_RECEPTOR_SIGNALING_PATHWAY_VIA_JAK_STAT GO:0007259 M11564 37 -0.3390567294699362 -1.0882110018349103 0.3365200764818356 0.8771219332708217 PKD2	JAK1	STAT5B	TYK2	NF2	CRLF3	STAMBP	STAT3	EP300 A cell surface receptor signaling pathway in which ligand binding causes the receptor to dimerize	bringing the receptor-associated JAKs into close proximity. The JAKs then phosphorylate and activate each other on tyrosine residues.This leads to the activation of associated STAT protein	causing the STATs to dissociate from the receptor	translocate to the nucleus. The pathway ends with regulation of target gene expression by STAT proteins. [PMID:12039028] http://amigo.geneontology.org/amigo/term/GO:0007259 2025.1.Hs down
GOBP_RECOMBINATIONAL_REPAIR GO:0000725 M15461 90 0.2840397204145287 1.0877204899388355 0.2869198312236287 0.8771219332708217 CREBBP	ACTR2	NSMCE4A	ERCC6	SPIDR	HELQ	SETD2	MCM7	ABL1	KDM1A	RFWD3	RTEL1	MBTD1	RNF138	MCM2	RNF169	UHRF1	DMC1 A DNA repair process that involves the exchange	reciprocal or nonreciprocal	of genetic material between the broken DNA molecule and a homologous DNA region. [GOC:elh] http://amigo.geneontology.org/amigo/term/GO:0000725 2025.1.Hs up
GOBP_ORGANIC_HYDROXY_COMPOUND_TRANSPORT GO:0015850 M11947 72 -0.2974895579558976 -1.0864166645127842 0.31417624521072796 0.8771219332708217 ACTB	STX1A	VAPB	PTPN11	ABCC4	SEC24A	TGM2	GRAMD1B	NFKB1	VAPA	SCARB1	PIP4K2A	ARL8B	OSBPL2	PINK1	ABCC3	OSBPL1A	FLVCR2	GRAMD1A	ABCA5	LIPA	COMMD1	SERAC1	ACACB	SYK The directed movement of an organic hydroxy compound (organic alcohol) into	out of or within a cell	or between cells	by means of some agent such as a transporter or pore. An organic hydroxy compound is an organic compound having at least one hydroxy group attached to a carbon atom. [GOC:ai] http://amigo.geneontology.org/amigo/term/GO:0015850 2025.1.Hs down
GOBP_DETECTION_OF_ABIOTIC_STIMULUS GO:0009582 M14474 26 0.3668926745579042 1.085655855739755 0.33675564681724846 0.8771219332708217 PTK2	TRPV1	GNAQ The series of events in which an (non-living) abiotic stimulus is received by a cell and converted into a molecular signal. [GOC:hb] http://amigo.geneontology.org/amigo/term/GO:0009582 2025.1.Hs up
GOBP_REGULATION_OF_NUCLEOCYTOPLASMIC_TRANSPORT GO:0046822 M12698 63 -0.30541044455263666 -1.0845089836632278 0.30666666666666664 0.8771219332708217 RBM22	BARD1	HSP90AA1	CHP1	PTPN11	UBR5	EI24	ALKBH5	YWHAE	NUP153	RANGAP1	WNK1	SUFU	TGFB1	JUP Any process that modulates the frequency	rate or extent of the directed movement of substances between the nucleus and the cytoplasm. [GOC:bf] http://amigo.geneontology.org/amigo/term/GO:0046822 2025.1.Hs down
GOBP_HEART_MORPHOGENESIS GO:0003007 M12997 95 0.2791977608608156 1.0836128307938206 0.2766393442622951 0.8771219332708217 COL5A1	PTK2	ASXL1	PLXND1	UBE4B	STIL	MICAL2	AHI1	FKBP1A	JUN	MIB1	SLIT2 The developmental process in which the heart is generated and organized. The heart is a hollow	muscular organ	which	by contracting rhythmically	keeps up the circulation of the blood. [GOC:dph	GOC:isa_complete] http://amigo.geneontology.org/amigo/term/GO:0003007 2025.1.Hs up
GOBP_ADAPTIVE_IMMUNE_RESPONSE_BASED_ON_SOMATIC_RECOMBINATION_OF_IMMUNE_RECEPTORS_BUILT_FROM_IMMUNOGLOBULIN_SUPERFAMILY_DOMAINS GO:0002460 M16548 75 -0.2928855508326024 -1.083467177108939 0.32007575757575757 0.8771219332708217 BACH2	MLH1	PPP3CB	SLAMF6	JAK1	TFRC	IL27RA	HMCES	TP53BP1	TGFB1	TYK2	MYO1G	PLA2G4A	ICAM1	STAT3	EP300	CD226	BRD4	ERCC1	CTSC	ADA	MR1	C1QBP	MEF2C	IL20RB	PCYT1A	C1R	EPHB2	HSPD1 An immune response mediated by lymphocytes expressing specific receptors for antigen produced through a somatic diversification process that includes somatic recombination of germline gene segments encoding immunoglobulin superfamily domains. Recombined receptors for antigen encoded by immunoglobulin superfamily domains include T cell receptors and immunoglobulins (antibodies) produced by B…	whereas others differentiate into effector cells. The memory cells generated during the primary response enable a much faster and stronger secondary immune response upon subsequent exposures to the same antigen (immunological memory). An example of this is the adaptive immune response found in Mus musculus. [GOC:add	GOC:mtg_sensu	ISBN:0781735149	ISBN:1405196831] http://amigo.geneontology.org/amigo/term/GO:0002460 2025.1.Hs down
GOBP_TAXIS GO:0042330 M12201 114 -0.2715243005838577 -1.0828796371819356 0.3007518796992481 0.8771219332708217 RPL13A	SEMA4G	CREB1	HSPB1	THBS1	RPS19	ROBO2	PPIA	SEMA3C	ABCC1	LGMN	APP	GSTP1	SLIT3	PTN	WNK1	ELMO2	BMPR2	VEGFC	PIP5K1C	CRKL	TGFB1 The directed movement of a motile cell or organism in response to an external stimulus. [GOC:jl	ISBN:0192801023] http://amigo.geneontology.org/amigo/term/GO:0042330 2025.1.Hs down
GOBP_COGNITION GO:0050890 M10386 104 -0.27575136369253495 -1.0828742016082178 0.3007518796992481 0.8771219332708217 CREB1	HIF1A	CCND2	PPT1	PPP3CB	VDAC1	GPI	PRNP	EIF4A3	LGMN	APP	VDAC3	PTN	ITGA5	EIF4EBP2	CYFIP1	SHROOM4	PRKCA	BRAF	PRKAR2B The operation of the mind by which an organism becomes aware of objects of thought or perception; it includes the mental activities associated with thinking	learning	and memory. [ISBN:0721619908] http://amigo.geneontology.org/amigo/term/GO:0050890 2025.1.Hs down
GOBP_NEGATIVE_REGULATION_OF_TRANSLATION GO:0017148 M11812 67 -0.2992685119987129 -1.0804928480216938 0.32122370936902483 0.8771219332708217 EIF4ENIF1	RPL13A	GAPDH	EIF3E	CAPRIN1	EIF4A3	ENC1	EIF2AK1	EIF2AK3	PATL2	RPS3	EIF4EBP2	CYFIP1	PRKCA	TNRC6C Any process that stops	prevents	or reduces the frequency	rate or extent of the chemical reactions and pathways resulting in the formation of proteins by the translation of mRNA or circRNA. [GOC:isa_complete] http://amigo.geneontology.org/amigo/term/GO:0017148 2025.1.Hs down
GOBP_REGULATION_OF_MICROTUBULE_CYTOSKELETON_ORGANIZATION GO:0070507 M34229 74 0.29357643372524 1.0795063267355984 0.3298538622129436 0.8771219332708217 ATXN7	MID1	CLASP1	SKA3	TBCD	STIL	HAUS6	MET	TACC3	NAV3	CAMSAP1	ABL1	DYRK1A	ARHGEF2	GSK3B Any process that modulates the frequency	rate or extent of the formation	arrangement of constituent parts	or disassembly of cytoskeletal structures comprising microtubules and their associated proteins. [GOC:mah] http://amigo.geneontology.org/amigo/term/GO:0070507 2025.1.Hs up
GOBP_REGULATION_OF_ENDOTHELIAL_CELL_MIGRATION GO:0010594 M12838 69 0.2954386932911188 1.0789355210687006 0.3169164882226981 0.8771219332708217 PTK2	ETS1	SP100	SEMA5A	PTPRM	AKT3	CALR	MET	SLIT2	FGFR1	ABL1	HDAC9	FOXP1	AAMP Any process that modulates the rate	frequency	or extent of the orderly movement of an endothelial cell into the extracellular matrix to form an endothelium. [GOC:BHF	GOC:dph	GOC:tb] http://amigo.geneontology.org/amigo/term/GO:0010594 2025.1.Hs up
GOBP_DEVELOPMENTAL_MATURATION GO:0021700 M3318 95 -0.27995538586433366 -1.0774364619789247 0.2918287937743191 0.8771219332708217 RPS6KA2	HIF1A	EXT1	RBPJ	STXBP1	APP	NOM1	RUNX2	XYLT1	YWHAZ	SNX19	ERCC2	ZBTB16	ATP6V1E1	ZDHHC20	TGFB1	NTN4	FAM210B	ARCN1	RFX3	BRCA2	RHOA	DLGAP4	VPS35	EPAS1	SPG21	AP3D1	NF1	NFIA A developmental process	independent of morphogenetic (shape) change	that is required for an anatomical structure	cell or cellular component to attain its fully functional state. [GO_REF:0000021	GOC:cls	GOC:dgh	GOC:dph	GOC:jid] http://amigo.geneontology.org/amigo/term/GO:0021700 2025.1.Hs down
GOBP_JNK_CASCADE GO:0007254 M13069 70 0.29420205339936284 1.0768608532775243 0.3276595744680851 0.8771219332708217 MAP3K10	RNF13	DUSP3	ERCC6	AXIN1	STK3	MAP2K4	JUN	DUSP22	SH3RF2	RASSF2	HIPK3	MAPKBP1	MAPK8IP3	TAOK1	MAP4K3	EDA2R A MAPK cascade containing at least the JNK (MAPK8) MAP kinase. It starts with the activation of JUN3K (a MAPK3K)	which activates JNKK a MAP2K)	which in turn activates JNK. The cascade can also contain an additional tier: the upstream MAP4K. The kinases in each tier phosphorylate and activate the kinases in the downstream tier. The JNK cascade is activated by stress signals	as well as by G protein-coupled receptors	growth factors	and cytokines	and results in cellular responses such as cell proliferation	cell differentiation	apoptosis and inflammation. [PMID:11790549	PMID:20811974	PMID:23125017] http://amigo.geneontology.org/amigo/term/GO:0007254 2025.1.Hs up
GOBP_REGULATION_OF_PROTEIN_CATABOLIC_PROCESS GO:0042176 M13743 162 -0.2578738923868008 -1.0765490710707537 0.28515625 0.8771219332708217 TIMP1	EEF1A1	FBXW7	LPCAT1	BARD1	HSP90AA1	RPL11	CAMLG	CST3	IRAK3	CHFR	SUMO2	STX5	AXIN2	USP7	GPX1	ADAM9	APP	VPS11	HSP90AB1	VCP	PSMC6	SH3RF3	EIF3H	FAM83D	NEDD4L	RAB7A	SNX9	CSNK1E	KEAP1	PSMF1	FAF1	GABARAP	VPS35	PSEN1	EPM2A	ITCH Any process that modulates the frequency	rate or extent of the chemical reactions and pathways resulting in the breakdown of a protein by the destruction of the native	active configuration	with or without the hydrolysis of peptide bonds. [GOC:go_curators	GOC:jl] http://amigo.geneontology.org/amigo/term/GO:0042176 2025.1.Hs down
GOBP_FATTY_ACID_METABOLIC_PROCESS GO:0006631 M17829 112 0.2706640556035196 1.0752939001739685 0.3036093418259023 0.8771219332708217 FADS2	SCD	AASDH	ACAD10	TMEM135	EIF6	PCCB	DAGLB	SCAP	ABHD2	PDK1	LPIN1	ABHD6	AKT2	ACSF3	ETFA	PTGES3	FASN	PTGR1	SESN2	FADS1	ADIPOR2	NDUFS6	ACACA	PDK3	AACS The chemical reactions and pathways involving fatty acids	aliphatic monocarboxylic acids liberated from naturally occurring fats and oils by hydrolysis. [ISBN:0198547684] http://amigo.geneontology.org/amigo/term/GO:0006631 2025.1.Hs up
GOBP_INORGANIC_ION_HOMEOSTASIS GO:0098771 M45921 168 -0.2562802374747735 -1.07457851182873 0.2804642166344294 0.8771219332708217 TPT1	ATP2B1	HIF1A	ANXA6	VAPB	EXT1	MT1E	PKD2	SLC31A1	CACNA1C	NPTN	ATP1B3	PRNP	TFRC	TGM2	YWHAE	BOLA2	APP	TMEM165	PACS2	EIF2AK1	ITPR1	WNK1	SMAD1	DIAPH1 Any process involved in the maintenance of an internal steady state of inorganic ions within an organism or cell. [GOC:dos] http://amigo.geneontology.org/amigo/term/GO:0098771 2025.1.Hs down
[truncated: 1,427 more rows]
[truncated: 95 more columns]

## Sheet: GSEA Reactome
pathway REACTOME_SET_ID msigdb_id size_num_pathway_genes_found Enrichment_Score_ES Normalized_Enrichment_Score_NES pval padj leadingEdge_core_genes_used_in_Enrichment_Score gs_description gs_url db_version regulation
[truncated: 643 more rows]
[truncated: 56 more columns]
